# Supplementary material
Source: publisher figshare collection journal article supplement (https://gsapubs.figshare.com/ndownloader/files/25190330)
Supplement: Supplementary file 1 [file 25190330]

## Sheet: ALL DZ SAMPLES
U/Pb detrital zircon geochronologic analyses by LA-ICP-MS analysis
	Isotope Ratios										Apparent Ages (Ma)
Analysis	U	206Pb	U/Th	206Pb*	± 1σ	207Pb*	± 1σ	206Pb*	± 1σ	error	206Pb*	± 1σ	207Pb*	± 1σ	206Pb*	± 1σ	Best Age	± 1σ	% conc
	(ppm)	204Pb		207Pb*	(%)	235U	(%)	238U	(%)	corr.	238U	(Ma)	235U	(Ma)	207Pb*	(Ma)	(Ma)	(Ma)
Sample 101517AL1: (Lat/Long: 46.52051, -112.966)--NAD 1983 coordinate system
101517AL1-0	52.7317	24694.4	2.24464	8.80976	0.791094	5.26335	1.23181	0.336445	0.944211	0.766521	1869.54	15.3233	1862.94	10.511	1855.56	14.2952	1855.56	14.2952	100.754
101517AL1-1	1667.1	42142.2	5.68622	20.6474	0.953101	0.0730674	1.21863	0.0109465	0.759382	0.623143	70.1824	0.530061	71.6061	0.842557	119.431	22.4773	70.1824	0.530061	NA
101517AL1-2	229.731	239380	3.14459	10.6927	0.61591	3.46842	1.08622	0.269096	0.894717	0.823702	1536.21	12.2298	1520.06	8.56118	1497.63	11.6493	1497.63	11.6493	102.576
101517AL1-3	273.505	24081.9	2.40856	10.3139	1.09257	3.25003	1.26862	0.24322	0.64475	0.508228	1403.41	8.13132	1469.18	9.8508	1565.54	20.4788	1565.54	20.4788	89.6442
101517AL1-4	463.161	85396.8	1.99474	17.9579	0.800366	0.500079	1.25701	0.0651603	0.969277	0.771095	406.932	3.82238	411.756	4.25498	438.87	17.8333	406.932	3.82238	92.7227
101517AL1-5	567.71	386896	2.85737	9.36546	0.525779	4.73995	0.96894	0.3221	0.813881	0.83997	1799.98	12.7822	1774.33	8.1246	1744.27	9.63109	1744.27	9.63109	103.194
101517AL1-6	143.444	347251	3.90794	12.2156	0.90831	2.37716	1.26347	0.210699	0.878256	0.695113	1232.54	9.85293	1235.76	9.03054	1241.38	17.8005	1241.38	17.8005	99.2876
101517AL1-7	345.71	659849	0.931067	9.92407	0.691675	3.9769	1.2753	0.286366	1.07144	0.840145	1623.35	15.376	1629.49	10.3477	1637.42	12.845	1637.42	12.845	99.1402
101517AL1-8	337.349	642752	0.895447	9.58656	0.487003	4.28763	1.25525	0.298241	1.15693	0.921671	1682.58	17.1332	1690.99	10.3355	1701.41	8.96882	1701.41	8.96882	98.8932
101517AL1-9	446.264	873010	2.95685	13.1629	0.583943	1.9413	1.30126	0.18541	1.16288	0.893656	1096.46	11.7251	1095.45	8.72083	1093.46	11.7057	1093.46	11.7057	100.274
101517AL1-10	2516.54	58768.3	1.93003	16.8536	2.17142	0.0339317	2.3677	0.00414941	0.943896	0.398655	26.6935	0.251438	33.882	0.788988	578.437	47.1678	26.6935	0.251438	NA
101517AL1-11	169.352	111370	4.12886	13.649	0.795542	1.6985	1.27477	0.168211	0.996067	0.78137	1002.25	9.24573	1007.97	8.14731	1020.4	16.1065	1020.4	16.1065	98.2215
101517AL1-13	689.636	539475	3.19339	12.3869	0.63647	2.32021	1.13525	0.208534	0.940057	0.828059	1221.01	10.4566	1218.49	8.05553	1214.05	12.5215	1214.05	12.5215	100.573
101517AL1-15	472.756	19064.8	1.20576	21.5543	1.29164	0.0746475	1.70214	0.0116745	1.10858	0.651287	74.8224	0.824674	73.1001	1.20054	17.1008	31.0175	74.8224	0.824674	NA
101517AL1-16	256.947	103262	1.68556	9.12262	0.451533	5.06496	1.20801	0.335262	1.12045	0.927516	1863.83	18.1355	1830.26	10.2439	1792.26	8.22356	1792.26	8.22356	103.994
101517AL1-18	1409.99	22400.2	2.1274	21.7572	1.59797	0.0256924	1.87486	0.00405598	0.980622	0.523036	26.0936	0.255363	25.7582	0.476857	NA	NA	26.0936	0.255363	NA
101517AL1-19	427.901	379717	601.075	8.89087	0.426076	5.24365	1.15647	0.338272	1.07512	0.929657	1878.35	17.5186	1859.74	9.86222	1838.98	7.71567	1838.98	7.71567	102.141
101517AL1-20	941.081	253446	1.8061	19.5078	0.616787	0.277593	1.1744	0.0392921	0.999399	0.850984	248.444	2.43571	248.746	2.59098	251.624	14.186	248.444	2.43571	NA
101517AL1-21	82.7113	259723	1.22793	8.53766	0.636688	5.71405	1.24462	0.353973	1.06944	0.859252	1953.54	18.0234	1933.5	10.7558	1912.06	11.4288	1912.06	11.4288	102.17
101517AL1-22	457.487	500473	4.32225	9.31544	0.551851	4.72742	1.19361	0.319533	1.05838	0.886704	1787.45	16.5217	1772.11	10.0039	1754.08	10.0982	1754.08	10.0982	101.902
101517AL1-23	72.2276	273247	4.5073	5.18031	0.428797	14.5939	0.843908	0.548547	0.726853	0.861293	2819.13	16.598	2789.13	8.01956	2767.5	7.0367	2767.5	7.0367	101.866
101517AL1-24	89.8778	136451	0.824585	8.3603	0.47099	5.83545	1.07185	0.353984	0.96282	0.898282	1953.6	16.2269	1951.69	9.29141	1949.65	8.41692	1949.65	8.41692	100.202
101517AL1-25	397.338	279488	1.21751	9.99873	0.419328	4.0083	1.09949	0.290799	1.01638	0.924416	1645.52	14.7608	1635.88	8.93513	1623.49	7.79955	1623.49	7.79955	101.357
101517AL1-26	377.836	270591	1.2102	5.44784	0.513	11.6426	1.26414	0.460216	1.15537	0.913958	2440.51	23.474	2576.1	11.8211	2684.56	8.48029	2684.56	8.48029	90.9092
101517AL1-27	975.979	362951	7.67489	5.70545	0.506043	11.0976	1.09185	0.459417	0.967497	0.88611	2436.99	19.6335	2531.36	10.1704	2607.89	8.43001	2607.89	8.43001	93.4468
101517AL1-28	94.7189	50614	1.1903	13.1082	0.727944	2.0221	1.07475	0.192324	0.790687	0.735694	1133.95	8.22173	1122.96	7.30195	1101.77	14.5714	1101.77	14.5714	102.921
101517AL1-29	5484.69	32485.3	0.377834	19.6264	0.721703	0.054822	1.14623	0.00780696	0.890504	0.776895	50.1315	0.444691	54.193	0.604893	237.662	16.6572	50.1315	0.444691	NA
101517AL1-30	119.871	17289.9	1.91159	7.85783	2.13485	5.78549	2.78413	0.329861	1.78713	0.641897	1837.71	28.5759	1944.24	24.1079	2059.7	37.6685	2059.7	37.6685	89.2219
101517AL1-31	216.998	39400.4	3.2609	11.1316	0.812055	2.87645	1.02498	0.232327	0.625417	0.610176	1346.69	7.60085	1375.76	7.72281	1421.16	15.5181	1421.16	15.5181	94.7593
101517AL1-32	736.927	320691	2.07469	12.4458	0.540916	2.29688	1.13543	0.207419	0.998309	0.879231	1215.05	11.0554	1211.33	8.03223	1204.72	10.6695	1204.72	10.6695	100.858
101517AL1-33	701.455	35361.4	1.26218	20.841	1.22204	0.0805071	1.57966	0.0121742	1.00097	0.633664	78.0061	0.776115	78.6215	1.19509	97.343	28.9325	78.0061	0.776115	NA
101517AL1-34	1302.86	32985.8	2.45668	20.7359	0.992399	0.104435	1.34731	0.015713	0.911249	0.676349	100.505	0.908747	100.862	1.29361	109.295	23.4351	100.505	0.908747	NA
101517AL1-35	662.085	8776.98	0.563234	21.9499	2.60556	0.0256599	2.96015	0.00408672	1.40482	0.474578	26.291	0.368589	25.726	0.751961	NA	NA	26.291	0.368589	NA
101517AL1-36	251.262	466298	1.35414	5.69879	0.420051	11.7806	1.04812	0.48712	0.960265	0.91618	2558.2	20.2769	2587.12	9.81002	2609.83	6.99615	2609.83	6.99615	98.0219
101517AL1-37	101.606	127527	1.58958	8.86816	0.586324	5.23329	1.17335	0.336741	1.01636	0.866199	1870.97	16.5049	1858.05	10.003	1843.61	10.6097	1843.61	10.6097	101.484
101517AL1-38	283.312	3902.36	2.26907	8.91897	7.79959	0.0680399	7.90206	0.00440318	1.26842	0.160518	28.3224	0.35846	66.8377	5.11152	1833.27	141.546	28.3224	0.35846	NA
101517AL1-39	1062.03	40057.2	1.08757	18.8713	0.845771	0.187731	1.16569	0.0257055	0.80218	0.688162	163.614	1.29596	174.692	1.87081	327.399	19.1875	163.614	1.29596	NA
101517AL1-40	209.413	242769	1.33778	10.0047	0.467017	4.0732	1.02163	0.295685	0.908638	0.8894	1669.87	13.3672	1648.95	8.32888	1622.37	8.688	1622.37	8.688	102.928
101517AL1-41	209.857	295952	0.982289	10.1716	0.57894	3.56163	1.11065	0.262861	0.947828	0.853397	1504.46	12.718	1541.03	8.80537	1591.54	10.8154	1591.54	10.8154	94.529
101517AL1-42	2099.87	25291.5	1.06593	21.4617	0.985617	0.0255675	1.29614	0.00398144	0.841744	0.649424	25.6151	0.215185	25.6345	0.3281	27.4828	23.6577	25.6151	0.215185	NA
101517AL1-44	567.008	6624.49	0.947204	17.5569	2.03777	0.091341	2.14284	0.0116359	0.662763	0.309292	74.577	0.491421	88.7518	1.82107	488.955	44.9721	74.577	0.491421	NA
101517AL1-46	502.538	2.5362e+06	5.23639	9.41989	0.608719	3.71293	1.94891	0.253776	1.8514	0.949971	1457.92	24.1575	1574.16	15.5912	1733.65	11.1655	1733.65	11.1655	84.0953
101517AL1-47	201.409	22530.4	2.84112	12.137	0.645147	1.96262	1.15428	0.172837	0.957159	0.829224	1027.72	9.09287	1102.78	7.76445	1254.03	12.6324	1254.03	12.6324	81.9536
101517AL1-50	698.468	366728	1.8164	8.18951	0.609307	6.08381	1.24107	0.361511	1.0812	0.871186	1989.33	18.5066	1987.93	10.8231	1986.46	10.842	1986.46	10.842	100.145
101517AL1-51	517.126	1.44179e+07	4.60021	9.30866	0.576002	4.67879	1.09281	0.316016	0.928686	0.849814	1770.24	14.3759	1763.45	9.14249	1755.41	10.5384	1755.41	10.5384	100.845
101517AL1-52	322.544	134417	1.75653	13.3994	0.503735	1.79052	1.20613	0.174081	1.0959	0.908609	1034.56	10.4747	1042.01	7.85823	1057.7	10.1409	1057.7	10.1409	97.8119
101517AL1-53	854.319	19385.4	2.77156	21.3061	1.15524	0.0770554	1.54501	0.0119123	1.0259	0.664011	76.3376	0.77853	75.3727	1.12234	44.8722	27.6291	76.3376	0.77853	NA
101517AL1-55	567.897	343364	1.65439	11.1807	0.487346	3.08337	1.23591	0.250139	1.13577	0.918973	1439.19	14.6498	1428.57	9.47625	1412.75	9.32357	1412.75	9.32357	101.872
101517AL1-57	110.724	46629.6	4.29175	11.6731	0.520843	2.7036	0.936592	0.228991	0.778414	0.831112	1329.21	9.34971	1329.45	6.94234	1329.81	10.0803	1329.81	10.0803	99.9543
101517AL1-58	623.173	270702	1.61208	20.5999	1.18968	0.0702868	1.50834	0.0105057	0.927221	0.614729	67.3711	0.621426	68.9716	1.00578	124.816	28.0363	67.3711	0.621426	NA
101517AL1-59	509.794	18736.6	1.1814	21.5904	1.28621	0.0758343	1.75438	0.0118799	1.19311	0.680076	76.1316	0.902991	74.2209	1.25566	13.0809	30.9271	76.1316	0.902991	NA
101517AL1-60	224.411	380912	2.35537	12.9802	0.547531	2.04534	1.02607	0.192634	0.867771	0.845724	1135.63	9.03545	1130.74	6.9975	1121.36	10.9185	1121.36	10.9185	101.272
101517AL1-61	101.422	204443	1.59655	6.1304	0.470734	10.9629	0.999625	0.487644	0.88185	0.882181	2560.47	18.6345	2519.99	9.30182	2487.53	7.93484	2487.53	7.93484	102.932
101517AL1-62	125.505	94521.5	1.35029	13.3459	0.607294	1.86376	1.63142	0.180478	1.51417	0.928133	1069.58	14.9231	1068.32	10.7811	1065.76	12.2114	1065.76	12.2114	100.359
101517AL1-63	119.169	287275	2.30919	9.21788	0.640232	4.76636	0.962002	0.318791	0.718018	0.746379	1783.82	11.1888	1778.99	8.07421	1773.32	11.6857	1773.32	11.6857	100.592
101517AL1-64	78.9909	130188	1.29272	8.57841	0.661697	5.57253	1.23229	0.346854	1.03957	0.843605	1919.56	17.2583	1911.86	10.6091	1903.51	11.8899	1903.51	11.8899	100.843
101517AL1-65	190.184	413689	0.89248	6.04345	0.610388	11.3188	1.09875	0.496332	0.913608	0.831497	2598.02	19.5355	2549.76	10.2512	2511.57	10.2614	2511.57	10.2614	103.442
101517AL1-66	189.527	110845	1.36097	10.6512	0.677326	3.41619	1.09688	0.264015	0.862769	0.786568	1510.35	11.6169	1508.13	8.61575	1504.99	12.7983	1504.99	12.7983	100.356
101517AL1-67	345.91	192644	1.78878	8.66333	0.605427	5.44811	1.11954	0.342467	0.941717	0.841163	1898.53	15.4865	1892.46	9.60498	1885.79	10.8998	1885.79	10.8998	100.675
101517AL1-68	114.872	398659	2.54966	13.1979	0.63023	1.93925	0.967354	0.185707	0.733883	0.75865	1098.08	7.40961	1094.74	6.48065	1088.09	12.6425	1088.09	12.6425	100.917
101517AL1-70	416.285	170581	2.16622	18.326	0.752456	0.463427	1.14163	0.0616223	0.858568	0.752052	385.484	3.21263	386.638	3.67087	393.533	16.8788	385.484	3.21263	NA
101517AL1-71	78.4646	233170	1.53276	3.73238	0.536107	25.4564	1.02536	0.689399	0.874045	0.852427	3380.32	22.9928	3325.89	10.0181	3293.23	8.4171	3293.23	8.4171	102.645
101517AL1-72	196.948	154773	1.73182	9.89666	0.411546	4.14684	0.8765	0.297779	0.773874	0.882914	1680.29	11.4468	1663.59	7.17077	1642.56	7.63766	1642.56	7.63766	102.297
101517AL1-73	1766.99	519553	1.45338	5.37661	0.595933	10.6446	1.2649	0.415264	1.11573	0.882064	2238.94	21.104	2492.6	11.7412	2706.3	9.8352	2706.3	9.8352	82.7308
101517AL1-74	210.574	859803	1.59199	8.12881	0.594188	6.17015	1.10439	0.363924	0.930922	0.842929	2000.75	16.0123	2000.23	9.65012	1999.68	10.5547	1999.68	10.5547	100.053
101517AL1-75	1208.03	1.09913e+06	2.04351	12.6421	5.15553	0.495078	5.6139	0.0454129	2.22179	0.395766	286.298	6.22176	408.365	18.8779	1173.82	102.069	286.298	6.22176	NA
101517AL1-76	266.684	31505.9	2.27997	19.5597	1.15357	0.316791	1.36939	0.0449598	0.737912	0.538861	283.503	2.04667	279.431	3.34515	245.467	26.5536	283.503	2.04667	NA
101517AL1-78	247.553	344068	2.21888	9.89466	0.656083	3.93036	1.11471	0.282177	0.901184	0.808447	1602.31	12.7851	1619.95	9.02312	1642.93	12.1754	1642.93	12.1754	97.5278
101517AL1-79	611.468	3.4498e+06	2.72633	15.9706	1.7694	0.860159	2.00181	0.0996755	0.936204	0.467678	612.507	5.47032	630.21	9.39927	694.242	37.7242	612.507	5.47032	88.2267
101517AL1-80	1313.91	2.77428e+06	2.22573	8.86261	0.400927	4.60322	0.976649	0.296014	0.890562	0.911855	1671.51	13.1125	1749.85	8.14708	1844.74	7.25515	1844.74	7.25515	90.6093
101517AL1-81	217.433	1.6748e+06	1.23354	7.78242	0.421813	6.76678	0.931313	0.382107	0.830312	0.89155	2086.12	14.798	2081.39	8.23904	2076.7	7.42619	2076.7	7.42619	100.454
101517AL1-83	173.148	618058	1.5148	10.0968	0.672555	3.32399	1.02413	0.243517	0.772336	0.754142	1404.96	9.74996	1486.7	7.99406	1605.32	12.5418	1605.32	12.5418	87.5187
101517AL1-85	326.09	27724.8	1.66819	20.1865	1.07644	0.174756	1.44989	0.0255966	0.971312	0.669923	162.93	1.56272	163.538	2.19003	172.339	25.1067	162.93	1.56272	NA
101517AL1-86	112.938	194584	1.23653	8.60103	0.815136	5.47023	1.50177	0.341384	1.26129	0.839872	1893.33	20.6932	1895.93	12.8927	1898.78	14.6534	1898.78	14.6534	99.713
101517AL1-87	262.312	479511	2.78285	11.3717	0.638164	2.99039	1.28397	0.246739	1.11415	0.867738	1421.64	14.2143	1405.18	9.77039	1380.28	12.2631	1380.28	12.2631	102.997
101517AL1-88	1216.66	431753	2.30154	11.5804	0.601105	2.67929	1.04097	0.225128	0.849875	0.816427	1308.92	10.0675	1322.76	7.69717	1345.24	11.6077	1345.24	11.6077	97.3001
101517AL1-89	753.346	32788	2.39524	20.6475	1.05821	0.102449	1.69317	0.0153485	1.32175	0.780635	98.191	1.28801	99.0349	1.59765	119.42	24.9275	98.191	1.28801	NA
101517AL1-90	455.748	162966	2.36881	8.44265	0.493401	5.95685	1.13237	0.364908	1.01922	0.90008	2005.4	17.5658	1969.57	9.84545	1932.12	8.83374	1932.12	8.83374	103.793
101517AL1-91	193.727	50902.3	1.46422	16.5015	0.896229	0.852042	1.26993	0.102017	0.899719	0.708479	626.219	5.3692	625.769	5.93232	624.122	19.3475	626.219	5.3692	100.336
101517AL1-92	587.087	801193	1.86238	14.2273	0.444904	1.47889	1.04851	0.152668	0.949435	0.905511	915.903	8.1064	921.777	6.35164	935.843	9.11079	935.843	9.11079	97.8693
101517AL1-93	334.684	472158	2.10448	10.7137	0.503038	3.3654	1.25203	0.261616	1.14653	0.915737	1498.11	15.3264	1496.38	9.80098	1493.92	9.51909	1493.92	9.51909	100.28
101517AL1-94	643.569	12747.2	1.65507	21.0993	1.42028	0.0751233	1.79412	0.0115009	1.09621	0.610999	73.7164	0.803482	73.5496	1.27291	68.1475	33.802	73.7164	0.803482	NA
101517AL1-95	80.3209	77303.5	2.40279	10.882	0.71562	3.20405	1.35342	0.252985	1.14875	0.848778	1453.85	14.9518	1458.14	10.4739	1464.38	13.5957	1464.38	13.5957	99.2812
101517AL1-96	81.8423	103895	2.4469	17.9382	1.3182	0.56467	1.5867	0.0734956	0.883158	0.556601	457.181	3.89778	454.562	5.81434	441.315	29.3451	457.181	3.89778	103.595
101517AL1-97	1357.94	405562	2.20303	20.6372	0.786842	0.0947542	1.16348	0.0141885	0.857071	0.736643	90.8224	0.772954	91.9225	1.02252	120.565	18.5517	90.8224	0.772954	NA
101517AL1-98	112.83	120147	1.37851	8.81846	0.578279	5.23025	1.12897	0.334659	0.969618	0.858855	1860.92	15.673	1857.56	9.62368	1853.78	10.4513	1853.78	10.4513	100.386
101517AL1-101	357.097	123048	1.14631	5.31815	0.473831	10.4848	1.44738	0.404583	1.36762	0.944895	2190.11	25.3949	2478.57	13.4176	2724.32	7.80671	2724.32	7.80671	80.3909
101517AL1-102	1051.27	1.1382e+06	6.28308	9.11936	0.759606	4.54403	1.18169	0.300672	0.905195	0.766021	1694.64	13.4892	1739.07	9.8347	1792.91	13.8315	1792.91	13.8315	94.5192
101517AL1-103	2128.78	155651	2.12316	20.2997	0.606619	0.177833	0.944062	0.0261932	0.723372	0.766233	166.679	1.19025	166.194	1.4473	159.292	14.193	166.679	1.19025	NA
101517AL1-104	59.4165	123589	2.06027	12.9848	0.907582	1.94878	1.23708	0.183605	0.840632	0.679529	1086.64	8.40625	1098.03	8.30153	1120.65	18.1017	1120.65	18.1017	96.9652
101517AL1-105	251.769	1.15677e+06	1.57746	8.84225	0.528892	5.21402	1.03784	0.334521	0.892964	0.860406	1860.26	14.4295	1854.91	8.84243	1848.91	9.56414	1848.91	9.56414	100.614
101517AL1-106	268.944	120573	3.20609	12.7807	0.604477	2.10757	1.12954	0.195445	0.95419	0.844756	1150.81	10.0565	1151.28	7.77862	1152.17	11.9825	1152.17	11.9825	99.882
101517AL1-107	501.998	36196.1	2.04865	19.5483	0.823429	0.249741	1.85798	0.0354232	1.66555	0.89643	224.401	3.67321	226.366	3.77002	246.842	18.9682	224.401	3.67321	NA
101517AL1-108	460.186	159899	1.65323	12.2517	0.595877	2.12233	1.39077	0.188667	1.25665	0.903565	1114.15	12.8579	1156.09	9.59912	1235.61	11.6871	1235.61	11.6871	90.17
101517AL1-109	872.561	24562.1	0.849089	15.2984	1.02528	0.556284	4.76853	0.0617491	4.657	0.976612	386.254	17.4596	449.105	17.3087	785.214	21.5336	386.254	17.4596	NA
101517AL1-110	562.758	238182	2.21925	9.31511	0.645834	4.57105	1.23093	0.308952	1.0479	0.851304	1735.55	15.9443	1744	10.2555	1754.14	11.8179	1754.14	11.8179	98.9402
101517AL1-111	1032.55	42437.8	3.16922	15.5464	3.71678	0.178552	4.46219	0.020141	2.46914	0.553347	128.547	3.14256	166.814	6.86436	751.355	78.5135	128.547	3.14256	NA
101517AL1-112	675.729	5.26913e+06	1.61259	9.97992	0.508058	4.01474	1.08381	0.290719	0.957355	0.883321	1645.12	13.9006	1637.19	8.81058	1626.99	9.44604	1626.99	9.44604	101.114
101517AL1-114	538.776	1.32024e+06	1.92586	8.09971	0.640353	5.98252	1.49922	0.351594	1.35558	0.904193	1942.21	22.7322	1973.31	13.0434	2006.05	11.3666	2006.05	11.3666	96.8174
101517AL1-115	293.132	5660.01	1.11425	15.4671	1.81376	0.105286	1.97026	0.0118159	0.76954	0.390578	75.7239	0.579316	101.644	1.90568	762.135	38.2379	75.7239	0.579316	NA
101517AL1-117	136.441	147805	1.09828	7.96699	0.617972	6.66499	1.17744	0.385285	1.00223	0.851197	2100.92	17.9692	2067.99	10.3961	2035.33	10.9322	2035.33	10.9322	103.223
101517AL1-118	277.122	2194.14	2.03663	24.5037	2.53622	0.0233395	2.7924	0.00414965	1.16838	0.418414	26.695	0.311254	23.4262	0.646665	NA	NA	26.695	0.311254	NA
101517AL1-119	232.199	61315.5	6.91599	14.64	0.620247	1.41294	1.16149	0.15009	0.98202	0.84548	901.47	8.26152	894.398	6.90608	876.978	12.8385	901.47	8.26152	102.793
101517AL1-120	229.414	621856	0.528632	9.77153	0.663189	4.06752	1.11941	0.28839	0.901803	0.805609	1633.48	13.0126	1647.82	9.12354	1666.13	12.2691	1666.13	12.2691	98.0401
101517AL1-121	134.68	61877.9	1.13008	20.9164	1.6246	0.174838	1.88642	0.0265344	0.958784	0.508256	168.822	1.59763	163.609	2.85053	88.8339	38.5209	168.822	1.59763	NA
101517AL1-122	57.6048	74954.2	0.712299	8.74021	0.644445	5.20812	1.06806	0.330287	0.851724	0.797453	1839.77	13.6321	1853.95	9.09822	1869.87	11.6266	1869.87	11.6266	98.3904
101517AL1-123	95.7481	90478.6	1.82777	13.3301	0.727043	1.93648	1.3253	0.187298	1.10807	0.836093	1106.72	11.2684	1093.78	8.87443	1068.13	14.6139	1068.13	14.6139	103.613
101517AL1-124	363.612	750580	2.19263	12.5807	0.588991	2.24796	1.0561	0.205203	0.876604	0.830039	1203.21	9.62154	1196.15	7.42198	1183.44	11.6389	1183.44	11.6389	101.671
101517AL1-125	275.965	5296.44	0.854887	21.7409	2.96827	0.0254894	3.24527	0.00402092	1.31194	0.404262	25.8686	0.3387	25.5572	0.819049	NA	NA	25.8686	0.3387	NA
101517AL1-126	47.9423	52809.7	1.35272	5.2983	0.607289	13.7057	1.04103	0.526898	0.845547	0.812219	2728.37	18.8093	2729.59	9.85198	2730.48	9.99654	2730.48	9.99654	99.9225
101517AL1-127	7220.33	460880	5.70544	20.8851	0.598759	0.0797201	1.08104	0.0120807	0.90007	0.8326	77.4104	0.692581	77.8817	0.810451	92.3683	14.2073	77.4104	0.692581	NA
101517AL1-128	333.701	70835.5	1.05605	18.042	0.893917	0.536475	1.32284	0.0702298	0.975097	0.737125	437.54	4.12487	436.098	4.6899	428.468	19.9306	437.54	4.12487	102.117
101517AL1-129	424.159	341170	1.79898	9.14049	0.533597	4.94513	1.09693	0.32797	0.958402	0.873711	1828.54	15.2585	1809.99	9.26484	1788.69	9.72063	1788.69	9.72063	102.228
101517AL1-130	135.07	5.65867e+06	1.11142	8.85033	0.543255	5.2304	0.871377	0.335878	0.681303	0.781868	1866.81	11.0427	1857.58	7.42785	1847.25	9.82587	1847.25	9.82587	101.059
101517AL1-131	196.503	163473	2.20506	8.15837	0.608164	6.02582	0.971056	0.356704	0.757025	0.779589	1966.53	12.8307	1979.58	8.45675	1993.23	10.8111	1993.23	10.8111	98.6604
101517AL1-132	256.475	82174	3.11353	13.1233	0.46935	1.94411	0.89531	0.185119	0.762424	0.851575	1094.88	7.67722	1096.42	6.0031	1099.49	9.39042	1099.49	9.39042	99.5807
101517AL1-133	127.74	130424	2.45331	8.82934	0.624577	5.22272	1.02108	0.33459	0.80778	0.791103	1860.59	13.055	1856.33	8.70196	1851.55	11.2912	1851.55	11.2912	100.488
101517AL1-134	799.782	491891	1.44485	17.9467	0.55204	0.522613	0.867575	0.0680537	0.669281	0.77144	424.419	2.74907	426.895	3.02363	440.264	12.2825	424.419	2.74907	96.4011
101517AL1-135	758.833	705999	5.62581	15.0047	1.01276	0.324053	3.13746	0.0352803	2.96951	0.946468	223.511	6.52344	285.016	7.79701	825.794	21.1341	223.511	6.52344	NA
101517AL1-136	174.195	318994	1.85794	10.6724	0.446518	3.38123	1.12147	0.261834	1.02875	0.917319	1499.22	13.761	1500.06	8.78835	1501.22	8.44131	1501.22	8.44131	99.8663
101517AL1-137	240.922	203647	1.84033	9.82751	0.516228	4.22553	0.894448	0.301309	0.730442	0.81664	1697.8	10.9027	1678.99	7.34418	1655.56	9.56274	1655.56	9.56274	102.551
101517AL1-138	379.282	75494.6	2.44264	17.8749	0.627182	0.536787	1.03862	0.06962	0.827874	0.79709	433.866	3.47366	436.304	3.68364	449.168	13.9536	433.866	3.47366	96.5932
101517AL1-139	1364.82	3.10624e+06	2.59201	12.4779	0.630718	2.14225	1.2265	0.193955	1.0519	0.857645	1142.76	11.0156	1162.55	8.49059	1199.63	12.416	1199.63	12.416	95.26
101517AL1-140	132.203	1342.7	2.20945	29.3498	6.89117	0.019879	7.13452	0.00423339	1.84747	0.258948	27.2326	0.502051	19.9868	1.41202	NA	NA	27.2326	0.502051	NA
101517AL1-141	53.8983	51312.4	1.67716	13.9895	1.04244	1.61698	1.4599	0.164133	1.02207	0.700097	979.703	9.28953	976.82	9.15946	970.324	21.2587	970.324	21.2587	100.967
101517AL1-142	550.975	1.26055e+06	2.89068	10.4131	0.482704	3.61155	1.04053	0.272874	0.921791	0.885886	1555.37	12.7388	1552.08	8.27447	1547.58	9.06956	1547.58	9.06956	100.503
101517AL1-143	43.5007	59112.2	2.08086	13.5441	0.905122	1.68295	1.40596	0.165391	1.07586	0.765213	986.664	9.84265	1002.1	8.95513	1036	18.2999	1036	18.2999	95.2376
101517AL1-144	266.077	85357.2	3.44315	11.6802	0.662772	2.46914	1.39506	0.209259	1.22756	0.879939	1224.87	13.6939	1263.04	10.0823	1328.64	12.8285	1328.64	12.8285	92.1896
101517AL1-145	123.227	111760	3.17148	14.0675	0.676455	1.56939	1.09003	0.16019	0.854733	0.784139	957.832	7.60772	958.184	6.76043	959.01	13.8266	959.01	13.8266	99.8771
101517AL1-146	116.999	128028	0.947721	5.84417	0.556608	11.4827	1.05013	0.486916	0.890488	0.847976	2557.32	18.7981	2563.17	9.80897	2567.8	9.30839	2567.8	9.30839	99.5919
101517AL1-149	463.385	9217.73	1.75208	21.9252	3.32281	0.0251561	3.58391	0.00400198	1.34287	0.374695	25.7469	0.34506	25.2271	0.892978	NA	NA	25.7469	0.34506	NA
101517AL1-150	653.438	375901	3.27408	8.61448	0.462583	5.33441	1.19394	0.333429	1.10068	0.921894	1854.98	17.7425	1874.39	10.2096	1895.97	8.31758	1895.97	8.31758	97.8383
101517AL1-151	222.382	12317.8	1.52084	18.9874	3.67493	0.0397822	4.74254	0.00548077	2.99777	0.632102	35.2348	1.05338	39.6114	1.84242	313.474	83.6349	35.2348	1.05338	NA
101517AL1-152	470.158	48490.2	2.18588	11.731	1.40252	0.582787	2.27327	0.0496057	1.78905	0.786994	312.1	5.45061	466.251	8.4992	1320.24	27.1795	312.1	5.45061	NA
101517AL1-154	253.868	1.44394e+06	3.23803	12.7347	0.50332	2.10742	0.958761	0.194728	0.816022	0.851121	1146.93	8.57391	1151.23	6.60234	1159.32	9.99951	1159.32	9.99951	98.9314
101517AL1-156	371.083	209486	2.01684	9.01106	0.455592	5.05204	1.22166	0.330316	1.13352	0.927859	1839.92	18.1437	1828.09	10.3552	1814.63	8.27283	1814.63	8.27283	101.393
101517AL1-157	581.462	278520	1.15655	10.0018	0.563871	4.06248	1.16399	0.29482	1.01829	0.87483	1665.57	14.9465	1646.81	9.4846	1622.92	10.4894	1622.92	10.4894	102.628
101517AL1-158	101.982	7936.17	1.64165	14.224	5.40858	0.125582	5.5852	0.0129609	1.39345	0.24949	83.0148	1.14935	120.12	6.32737	936.318	110.994	83.0148	1.14935	NA
101517AL1-159	303.32	192607	5.15275	9.51791	0.485881	4.50918	0.847522	0.311406	0.694416	0.819348	1747.62	10.6299	1732.67	7.04367	1714.64	8.93503	1714.64	8.93503	101.924
101517AL1-160	248.453	154040	1.96896	9.94913	0.419532	4.12831	0.93665	0.29802	0.83744	0.89408	1681.48	12.3947	1659.92	7.6562	1632.74	7.79571	1632.74	7.79571	102.985
101517AL1-161	165.72	579607	2.88966	10.7187	0.671597	3.26799	1.16702	0.254163	0.954403	0.817815	1459.91	12.4683	1473.46	9.07352	1493.03	12.7103	1493.03	12.7103	97.7813
101517AL1-163	737.667	742911	1.98781	8.47515	0.605229	5.09202	1.22679	0.313131	1.06711	0.869835	1756.09	16.4038	1834.78	10.4123	1925.24	10.8452	1925.24	10.8452	91.2142
101517AL1-165	399.417	148466	1.1275	9.98336	0.547566	4.11437	1.16969	0.298035	1.03361	0.88366	1681.56	15.2987	1657.16	9.55486	1626.35	10.1816	1626.35	10.1816	103.394
101517AL1-166	123.074	155383	2.03407	11.4208	0.51355	2.90569	1.23437	0.240787	1.12247	0.909346	1390.79	14.042	1383.39	9.3248	1371.98	9.87967	1371.98	9.87967	101.371
101517AL1-168	29.3662	111660	0.643289	8.44977	0.818341	5.78735	1.37481	0.354823	1.10472	0.803547	1957.59	18.651	1944.52	11.9034	1930.61	14.6554	1930.61	14.6554	101.397
101517AL1-169	1862.56	927181	0.638094	20.2294	0.636252	0.178844	0.992797	0.026251	0.762121	0.767651	167.042	1.25671	167.066	1.52936	167.385	14.859	167.042	1.25671	NA
101517AL1-171	432.584	2.94111e+07	3.68758	9.42441	0.582909	4.60084	1.21608	0.314615	1.06728	0.877633	1763.38	16.4655	1749.42	10.1436	1732.77	10.6931	1732.77	10.6931	101.766
101517AL1-172	345.293	23691.6	1.11757	18.0036	3.00271	0.0954392	3.15835	0.0124674	0.979236	0.310047	79.8729	0.777319	92.5576	2.79402	433.21	66.9047	79.8729	0.777319	NA
101517AL1-173	243.082	9055.7	2.01182	12.042	6.17448	0.0465971	6.29007	0.00407141	1.20035	0.190832	26.1927	0.313765	46.2446	2.84358	1269.39	120.627	26.1927	0.313765	NA
101517AL1-174	195.891	246523	5.21154	4.44955	0.617052	14.8403	1.60691	0.479121	1.48371	0.923333	2523.44	30.9822	2805.05	15.2874	3014.27	9.90864	3014.27	9.90864	83.7164
101517AL1-175	562.731	113700	1.15612	9.9249	0.58983	3.92567	1.03686	0.282701	0.852754	0.822435	1604.95	12.1156	1618.99	8.39094	1637.27	10.9538	1637.27	10.9538	98.0261
101517AL1-176	1227.02	621210	1.52987	9.06894	0.508453	4.05685	1.15088	0.266952	1.03248	0.897117	1525.31	14.024	1645.68	9.37525	1803	9.24796	1803	9.24796	84.5988
101517AL1-177	355.934	10378.8	1.77245	14.0454	3.90478	0.039567	4.07883	0.00403232	1.17878	0.289	25.9417	0.305181	39.4012	1.57633	962.227	79.7947	25.9417	0.305181	NA
101517AL1-178	793.106	22085.3	1.09878	19.1667	2.12904	0.0294496	2.42231	0.00409558	1.15533	0.476953	26.3479	0.303783	29.4708	0.703614	292.03	48.6416	26.3479	0.303783	NA
101517AL1-179	135.144	146926	3.13908	7.83184	0.690925	6.76398	1.30254	0.384374	1.10419	0.84772	2096.68	19.7635	2081.02	11.5228	2065.55	12.1808	2065.55	12.1808	101.507
101517AL1-180	77.6667	130334	0.785126	13.0869	0.678336	1.98472	0.960053	0.188462	0.679384	0.707653	1113.04	6.94499	1110.33	6.48226	1105.03	13.5602	1105.03	13.5602	100.725
101517AL1-181	884.056	7843.07	0.856433	21.5892	1.64589	0.0253354	1.9099	0.00396874	0.968905	0.507305	25.5335	0.246906	25.4046	0.479185	13.2235	39.5759	25.5335	0.246906	NA
101517AL1-182	75.0409	154760	0.870774	8.82534	0.602527	5.47625	0.988204	0.350673	0.783268	0.792618	1937.81	13.1094	1896.88	8.48489	1852.37	10.8914	1852.37	10.8914	104.613
101517AL1-184	411.477	4119.91	1.52586	20.3433	2.54918	0.0273785	2.90522	0.00404127	1.39356	0.479674	25.9992	0.361585	27.4259	0.786119	154.252	59.6958	25.9992	0.361585	NA
101517AL1-185	158.265	2.24072e+06	2.59749	8.10451	0.571756	6.09171	0.8749	0.358223	0.662227	0.756917	1973.75	11.2592	1989.06	7.63106	2005	10.1499	2005	10.1499	98.4414
101517AL1-186	304.337	153205	1.40898	10.0555	0.477622	3.69793	1.13304	0.269806	1.02745	0.906809	1539.82	14.0732	1570.92	9.05602	1612.95	8.89613	1612.95	8.89613	95.466
101517AL1-188	408.431	6303.52	1.793	19.3879	3.18043	0.0305598	3.39296	0.00429902	1.18197	0.348359	27.6539	0.32616	30.5652	1.02161	265.769	72.9971	27.6539	0.32616	NA
101517AL1-189	1007.43	617165	2.6661	10.7204	0.610137	3.19279	1.15615	0.248354	0.982045	0.849411	1429.98	12.5946	1455.42	8.93968	1492.73	11.5476	1492.73	11.5476	95.7964
101517AL1-191	138.999	33425.9	1.1829	5.12847	0.668101	13.2963	1.59865	0.494773	1.45235	0.908486	2591.29	30.9902	2700.92	15.0981	2783.99	10.944	2783.99	10.944	93.0785
101517AL1-193	100.192	122046	3.89328	8.83567	0.55949	5.39	1.18998	0.345554	1.05025	0.882577	1913.33	17.387	1883.27	10.1923	1850.25	10.1159	1850.25	10.1159	103.409
101517AL1-194	620.696	29029.4	1.37337	21.7964	1.93368	0.0284603	2.24545	0.00450103	1.14147	0.508346	28.9504	0.329718	28.4945	0.630936	NA	NA	28.9504	0.329718	NA
101517AL1-195	468.184	216380	1.07169	9.49623	0.574132	4.48367	1.27143	0.308939	1.13442	0.892239	1735.48	17.2602	1727.95	10.556	1718.83	10.5523	1718.83	10.5523	100.969
101517AL1-196	707.068	110564	1.1852	19.9288	0.62305	0.181035	1.08027	0.0261776	0.88249	0.816917	166.581	1.45123	168.95	1.68136	202.258	14.4656	166.581	1.45123	NA
101517AL1-199	528.708	33311.4	1.12004	18.2843	0.838247	0.462767	1.33742	0.0613943	1.04213	0.77921	384.1	3.88592	386.181	4.29624	398.646	18.7869	384.1	3.88592	NA
101517AL1-200	283.452	234209	1.40421	8.86984	0.536438	5.15131	1.18027	0.331529	1.05132	0.890745	1845.79	16.8743	1844.61	10.0364	1843.27	9.70913	1843.27	9.70913	100.137
101517AL1-201	121.982	41554.4	3.00262	12.6732	0.570179	2.20448	0.958427	0.202712	0.770375	0.803791	1189.88	8.37027	1182.46	6.69489	1168.95	11.3095	1168.95	11.3095	101.79
101517AL1-202	344.446	186194	2.65067	9.26972	0.454447	4.81096	0.927271	0.323583	0.808276	0.871672	1807.2	12.7383	1786.82	7.79523	1763.07	8.30649	1763.07	8.30649	102.503
101517AL1-203	632.77	311039	1.71331	13.393	3.85203	0.0402732	4.11738	0.00391365	1.45419	0.353183	25.1797	0.365447	40.0907	1.61853	1058.66	77.5595	25.1797	0.365447	NA
101517AL1-204	304.997	191543	3.55071	20.4206	1.06087	0.174602	1.49592	0.0258706	1.05468	0.705036	164.652	1.71456	163.405	2.25787	145.402	24.8761	164.652	1.71456	NA
101517AL1-205	132.971	128633	1.6795	5.8443	0.529621	11.6966	0.972701	0.495998	0.815873	0.838771	2596.57	17.4378	2580.43	9.09899	2567.76	8.8571	2567.76	8.8571	101.122
101517AL1-206	201.9	1739.44	1.85092	20.2904	9.37865	0.0297661	9.45969	0.00438228	1.23553	0.13061	28.1883	0.347516	29.7829	2.77645	160.363	219.777	28.1883	0.347516	NA
101517AL1-208	629.631	885854	3.39275	11.6988	0.706766	2.69348	1.33807	0.228634	1.13618	0.849121	1327.34	13.6296	1326.67	9.9083	1325.57	13.6868	1325.57	13.6868	100.133
101517AL1-209	216.164	10455.6	1.82677	21.7296	3.93505	0.0272426	4.18127	0.00429524	1.41367	0.338097	27.6296	0.389757	27.2916	1.12594	NA	NA	27.6296	0.389757	NA
101517AL1-210	560.17	158231	2.18786	13.3032	0.593959	1.84599	1.33464	0.178186	1.19519	0.895514	1057.06	11.6523	1062	8.79023	1072.2	11.9173	1072.2	11.9173	98.5879
101517AL1-211	242.862	18304.5	2.22473	14.014	6.40235	0.0410724	6.54279	0.00417639	1.34833	0.206079	26.8667	0.361497	40.8705	2.62097	966.751	130.825	26.8667	0.361497	NA
101517AL1-212	1512.08	85146.9	9.69733	19.5458	0.630451	0.255701	1.1042	0.0362637	0.906528	0.820981	229.632	2.04504	231.196	2.2831	247.141	14.5208	229.632	2.04504	NA
101517AL1-213	642.456	64849.4	2.63866	18.1388	1.79941	0.117418	2.15506	0.0154536	1.18592	0.550297	98.8584	1.16344	112.728	2.29936	416.527	40.2249	98.8584	1.16344	NA
101517AL1-214	298.633	443570	1.58838	9.40828	0.535674	4.13387	1.03984	0.282199	0.891245	0.857099	1602.43	12.6449	1661.03	8.50194	1735.91	9.82261	1735.91	9.82261	92.3104
101517AL1-215	165.426	141518	2.27743	10.7189	0.520908	3.3099	0.895945	0.257426	0.728953	0.813613	1476.66	9.62028	1483.39	6.9866	1493.01	9.85847	1493.01	9.85847	98.905
101517AL1-216	193.467	985942	1.92689	13.7127	0.750815	1.7143	1.23169	0.170568	0.976388	0.792723	1015.24	9.17152	1013.9	7.89894	1010.98	15.2224	1010.98	15.2224	100.422
101517AL1-217	347.531	180271	1.97542	6.1396	0.475262	9.52283	1.5108	0.424223	1.4341	0.949232	2279.62	27.537	2389.75	13.8835	2485	8.01321	2485	8.01321	91.7352
101517AL1-218	602.897	22677.4	1.27139	20.5614	0.840585	0.160953	1.32427	0.0240125	1.02328	0.772715	152.965	1.54685	151.537	1.86419	129.226	19.7898	152.965	1.54685	NA
101517AL1-219	469.603	32933.2	1.68324	20.1086	1.44942	0.0821347	1.82112	0.0119838	1.10258	0.605439	76.7935	0.841685	80.15	1.40351	181.36	33.7877	76.7935	0.841685	NA
101517AL1-220	424.17	1.58853e+06	3.05275	10.6891	0.549581	3.31852	1.10114	0.25738	0.954181	0.866542	1476.42	12.5909	1485.42	8.59193	1498.26	10.3938	1498.26	10.3938	98.5424
101517AL1-221	186.208	18227.6	2.97458	20.411	3.65205	0.0290072	3.93581	0.00429594	1.46735	0.372821	27.6341	0.404621	29.0344	1.12655	146.508	85.6858	27.6341	0.404621	NA
101517AL1-222	267.804	42717.8	0.948098	21.8608	3.28004	0.0262245	3.46537	0.00415969	1.1181	0.32265	26.7595	0.298579	26.2848	0.899178	NA	NA	26.7595	0.298579	NA
101517AL1-223	72.4548	86409.3	6.0843	9.96371	0.753026	3.73861	1.37757	0.270283	1.15353	0.837371	1542.24	15.8222	1579.67	11.0362	1630.02	13.9961	1630.02	13.9961	94.6149
101517AL1-226	293.131	1.16379e+06	2.03042	19.6981	1.28141	0.184155	1.53438	0.0263205	0.843997	0.550056	167.478	1.39531	171.629	2.42292	229.21	29.6012	167.478	1.39531	NA
101517AL1-229	76.3273	2.69532e+06	2.24025	12.2249	0.595279	2.43565	1.06897	0.216047	0.887882	0.830598	1260.95	10.1688	1253.19	7.695	1239.88	11.6497	1239.88	11.6497	101.7
101517AL1-230	590.876	4590.09	1.11595	21.8796	2.15291	0.0253357	2.37319	0.00402216	0.998501	0.420742	25.8765	0.257859	25.405	0.595428	NA	NA	25.8765	0.257859	NA
101517AL1-231	565.647	19546.6	1.33732	20.2264	1.18334	0.0819928	1.4914	0.0120332	0.907731	0.608645	77.1082	0.695765	80.0167	1.14756	167.725	27.6436	77.1082	0.695765	NA
101517AL1-233	352.913	64069.8	0.879276	20.4106	1.83778	0.0803986	2.09621	0.0119067	1.00829	0.481006	76.3021	0.764811	78.5196	1.58391	146.557	43.1163	76.3021	0.764811	NA
101517AL1-234	49.0059	38663.1	0.346308	8.19032	0.714548	6.22564	1.08307	0.369976	0.813914	0.75149	2029.29	14.1696	2008.06	9.47558	1986.28	12.715	1986.28	12.715	102.165
101517AL1-236	1510.57	318171	1.34644	19.9523	0.486651	0.17852	0.797783	0.0258444	0.632162	0.792398	164.487	1.02667	166.786	1.22706	199.534	11.3217	164.487	1.02667	NA
101517AL1-237	313.275	119561	1.42166	11.6979	0.605164	2.58183	1.30143	0.219141	1.15217	0.885311	1277.34	13.3508	1295.5	9.52547	1325.71	11.7182	1325.71	11.7182	96.3514
101517AL1-238	281.601	169701	2.31741	5.9922	0.58172	10.2658	1.21078	0.44634	1.06188	0.877022	2378.96	21.1247	2459.02	11.2032	2525.88	9.76843	2525.88	9.76843	94.1833
101517AL1-240	483.058	2.61931e+06	6.3913	9.00846	0.539488	4.693	1.28226	0.306753	1.16325	0.907185	1724.71	17.603	1765.99	10.7333	1815.16	9.79599	1815.16	9.79599	95.0169
101517AL1-241	348.161	15004.2	2.70891	14.1353	6.08764	0.0378092	6.17917	0.00387784	1.05963	0.171484	24.9499	0.263865	37.6829	2.28581	949.156	124.709	24.9499	0.263865	NA
101517AL1-242	107.247	135203	1.23935	8.4168	0.598676	5.66189	1.03476	0.345777	0.843991	0.815637	1914.4	13.9791	1925.58	8.92989	1937.61	10.7121	1937.61	10.7121	98.8023
101517AL1-244	195.924	28614.9	1.62504	16.9391	3.53247	0.0997916	3.6514	0.0122651	0.92431	0.253139	78.5852	0.721961	96.584	3.36414	567.459	76.9222	78.5852	0.721961	NA
101517AL1-245	313.313	673680	1.42972	9.07662	0.536639	4.85041	1.07854	0.319441	0.93556	0.86743	1787	14.6013	1793.69	9.07968	1801.46	9.76248	1801.46	9.76248	99.1974
101517AL1-246	411.115	307008	1.50394	9.38238	0.622327	4.41192	1.19827	0.30035	1.02399	0.854559	1693.05	15.247	1714.58	9.91917	1740.97	11.4047	1740.97	11.4047	97.2474
101517AL1-247	325.765	144490	2.59169	9.2725	0.582115	4.66192	1.43148	0.313653	1.30778	0.913583	1758.66	20.129	1760.43	11.9684	1762.52	10.6408	1762.52	10.6408	99.7806
101517AL1-248	383.527	114291	11.9063	18.1131	0.605585	0.528078	1.18107	0.0694031	1.014	0.858542	432.559	4.24221	430.533	4.14438	419.688	13.5225	432.559	4.24221	103.067
101517AL1-249	987.976	200355	1.69163	9.68866	0.636379	4.03102	0.905636	0.283378	0.644359	0.711498	1608.35	9.17186	1640.48	7.36801	1681.88	11.7512	1681.88	11.7512	95.6285
101517AL1-250	303.69	99653.4	2.67249	16.2259	0.739673	0.882636	1.15189	0.103915	0.883026	0.766589	637.312	5.35839	642.405	5.48353	660.373	15.8361	637.312	5.35839	96.5078
101517AL1-251	72.4586	135055	2.72486	5.26644	0.526564	14.0868	0.901226	0.538291	0.731395	0.811556	2776.29	16.4987	2755.57	8.54454	2740.4	8.6595	2740.4	8.6595	101.31
101517AL1-252	223.549	121519	1.70366	8.8557	0.595699	4.33108	1.20889	0.278296	1.05193	0.870162	1582.77	14.7632	1699.3	9.97269	1846.16	10.7761	1846.16	10.7761	85.7334
101517AL1-253	293.464	2100.35	1.57146	24.7072	7.98758	0.0225863	8.10118	0.00404908	1.35193	0.166881	26.0493	0.351458	22.6786	1.81687	NA	NA	26.0493	0.351458	NA
101517AL1-256	764.904	34354.5	1.97046	17.6099	2.67715	0.0982873	3.07036	0.0125586	1.50333	0.489624	80.454	1.20197	95.1941	2.78999	482.3	59.1453	80.454	1.20197	NA
101517AL1-257	410.835	66310.9	2.73173	19.789	1.04501	0.186774	1.47307	0.0268182	1.03822	0.704797	170.603	1.748	173.873	2.35398	218.594	24.1866	170.603	1.748	NA
101517AL1-258	421.323	159279	2.54221	14.211	0.52175	1.55292	1.00603	0.160126	0.860156	0.855002	957.479	7.65338	951.657	6.2138	938.199	10.6943	938.199	10.6943	102.055
101517AL1-259	311.887	6.53004e+06	1.28623	11.3718	0.489307	2.82158	1.09294	0.232815	0.977294	0.894185	1349.23	11.8975	1361.29	8.19382	1380.24	9.40266	1380.24	9.40266	97.7533
101517AL1-260	208.927	912317	0.94194	8.71985	0.655361	5.36175	1.09233	0.339237	0.873898	0.800027	1883	14.27	1878.77	9.3482	1874.08	11.8176	1874.08	11.8176	100.476
101517AL1-261	125.348	146373	1.66157	12.3489	0.68441	2.29374	1.23116	0.205523	1.02339	0.831244	1204.92	11.2472	1210.36	8.7058	1220.05	13.4622	1220.05	13.4622	98.7599
101517AL1-263	408.655	24979.6	4.10055	17.1319	3.39627	0.0536892	3.6139	0.0066739	1.23515	0.341777	42.8798	0.527872	53.102	1.86974	542.745	74.2655	42.8798	0.527872	NA
101517AL1-265	463.799	221874	2.23757	13.4823	0.586109	1.76655	0.998006	0.172813	0.807769	0.809384	1027.59	7.67278	1033.25	6.47077	1045.28	11.8402	1045.28	11.8402	98.3075
101517AL1-267	115.923	2.45071e+06	1.3918	13.1757	0.739568	1.92205	1.24157	0.18375	0.997268	0.803229	1087.43	9.97923	1088.78	8.29256	1091.51	14.8058	1091.51	14.8058	99.6263
101517AL1-268	319.536	274011	1.86235	5.94447	0.433729	11.2672	0.985572	0.485977	0.885003	0.89796	2553.25	18.6581	2545.49	9.1918	2539.3	7.27353	2539.3	7.27353	100.549
101517AL1-269	821.548	6374.91	0.818266	12.7328	8.34254	0.186409	8.40557	0.0172218	1.02742	0.12223	110.074	1.12132	173.561	13.4108	1159.62	165.709	110.074	1.12132	NA
101517AL1-270	1447.07	80727.3	2.13644	20.164	0.598273	0.162944	1.34479	0.0238398	1.20437	0.895588	151.878	1.8078	153.276	1.91321	174.938	13.9419	151.878	1.8078	NA
101517AL1-271	751.752	76351.5	2.55302	9.41442	0.64128	4.34017	1.31556	0.296475	1.14867	0.873145	1673.8	16.9332	1701.03	10.8569	1734.72	11.7613	1734.72	11.7613	96.4887
101517AL1-272	146.688	73277.5	2.2357	14.1799	0.780629	1.52889	1.11739	0.157303	0.799489	0.715496	941.77	7.0052	942.053	6.85944	942.695	15.9954	942.695	15.9954	99.9018
101517AL1-273	221.772	135214	1.65025	13.3642	0.558449	1.83752	1.16954	0.178181	1.0276	0.878635	1057.03	10.0183	1058.97	7.69037	1063	11.2337	1063	11.2337	99.4384
101517AL1-274	433.844	383117	4.27563	9.2219	0.61673	4.08426	1.32014	0.273289	1.16722	0.884167	1557.47	16.1498	1651.17	10.7684	1772.52	11.2578	1772.52	11.2578	87.8677
101517AL1-275	557.117	157154	2.63905	9.60503	0.481339	4.51398	0.909549	0.314591	0.771746	0.848493	1763.26	11.9055	1733.55	7.56064	1697.87	8.86845	1697.87	8.86845	103.851
101517AL1-279	284.409	46790.4	2.27292	20.1987	1.17006	0.182688	1.62583	0.0267745	1.12885	0.694322	170.329	1.89759	170.371	2.55004	170.927	27.3033	170.329	1.89759	NA
101517AL1-280	603.819	303887	1.80831	19.605	0.987732	0.114081	1.38371	0.0162281	0.969037	0.700319	103.773	0.99755	109.691	1.4387	240.157	22.7833	103.773	0.99755	NA
101517AL1-281	533.866	38377.7	0.974724	20.157	1.76482	0.0796166	2.10134	0.0116444	1.14064	0.542816	74.6309	0.846363	77.7844	1.57348	175.752	41.1642	74.6309	0.846363	NA
101517AL1-282	224.838	6449.1	1.42335	18.2453	3.06677	0.0916114	3.21377	0.0121279	0.960858	0.298982	77.7115	0.742214	89.0033	2.73859	403.433	68.6928	77.7115	0.742214	NA
101517AL1-283	276.141	10398.2	1.73282	21.0238	1.52495	0.171507	1.79765	0.0261626	0.95188	0.529514	166.486	1.56446	160.726	2.67222	76.6397	36.2096	166.486	1.56446	NA
101517AL1-285	291.732	55401.3	4.10956	16.0398	1.41776	0.763042	2.32636	0.0888048	1.84443	0.792838	548.465	9.69767	575.764	10.2237	685.048	30.2468	548.465	9.69767	80.0623
101517AL1-286	84.5735	89786.5	0.901776	9.86798	0.553394	4.00212	0.906889	0.286554	0.718473	0.792239	1624.29	10.3159	1634.63	7.36763	1647.94	10.2631	1647.94	10.2631	98.5645
101517AL1-287	370.493	63739.5	2.36267	18.0977	0.713864	0.518283	1.1862	0.0680577	0.947344	0.79864	424.443	3.89142	424.004	4.11153	421.592	15.9347	424.443	3.89142	100.676
101517AL1-288	1252.96	43765	2.61543	20.6827	0.871205	0.0708774	1.47769	0.0106366	1.19355	0.807716	68.2058	0.809782	69.5317	0.993074	115.406	20.5379	68.2058	0.809782	NA
101517AL1-289	110.103	242465	1.98505	9.91471	0.604518	3.90982	1.13892	0.28127	0.965244	0.847508	1597.76	13.6596	1615.71	9.20929	1639.17	11.2239	1639.17	11.2239	97.4733
101517AL1-290	482.672	30942.3	2.52852	20.2372	1.02156	0.179455	1.38722	0.0263507	0.938503	0.676537	167.668	1.55328	167.591	2.14313	166.484	23.8895	167.668	1.55328	NA
101517AL1-291	165.988	1147.04	2.27262	28.7203	4.31003	0.0196191	4.44576	0.00408842	1.09012	0.245206	26.3019	0.286139	19.728	0.868593	NA	NA	26.3019	0.286139	NA
101517AL1-292	443.311	17090.1	2.35131	20.1252	0.923213	0.174091	1.45809	0.0254216	1.12858	0.774014	161.83	1.80365	162.963	2.19527	179.433	21.5364	161.83	1.80365	NA
101517AL1-293	446.447	296125	1.75163	9.93588	0.395771	4.08771	0.930608	0.294696	0.842257	0.905061	1664.95	12.3586	1651.85	7.59211	1635.21	7.35183	1635.21	7.35183	101.819
101517AL1-295	127.778	11228.6	1.22072	19.9911	2.77966	0.0819258	3.05499	0.0118835	1.26747	0.414884	76.1544	0.959553	79.9539	2.3489	195.042	64.6256	76.1544	0.959553	NA
101517AL1-296	24.983	23506.5	0.56759	5.40495	0.749888	13.4364	1.13104	0.526942	0.846708	0.748612	2728.55	18.8362	2710.82	10.6892	2697.62	12.3829	2697.62	12.3829	101.147
101517AL1-297	936.684	248646	2.06242	16.5624	0.620693	0.805248	1.36117	0.09677	1.21141	0.88998	595.452	6.89026	599.785	6.1651	616.179	13.4228	595.452	6.89026	96.6362
101517AL1-298	499.159	107911	2.28884	10.9102	0.426324	2.99567	0.935749	0.237144	0.832991	0.890186	1371.83	10.2932	1406.52	7.12362	1459.46	8.10478	1459.46	8.10478	93.9961
101517AL1-299	383.544	152267	2.01062	9.34967	0.410272	4.5331	1.03693	0.307524	0.952311	0.918397	1728.51	14.4387	1737.06	8.62612	1747.36	7.51197	1747.36	7.51197	98.9213
101517AL1-302	96.9899	1.94547e+06	1.61177	8.35725	0.550592	5.84304	1.25095	0.354315	1.12326	0.897929	1955.17	18.944	1952.82	10.8461	1950.31	9.83872	1950.31	9.83872	100.25
101517AL1-303	189.476	83249.7	17.6717	8.79922	0.580509	5.0834	1.16596	0.324553	1.01117	0.867245	1811.93	15.9721	1833.34	9.89316	1857.72	10.4866	1857.72	10.4866	97.535
101517AL1-304	85.6134	30987.1	1.87496	12.4703	0.853847	2.14764	1.05883	0.194324	0.626155	0.591364	1144.76	6.56757	1164.29	7.33569	1200.8	16.8118	1200.8	16.8118	95.3329
101517AL1-305	380.995	64004.5	2.45922	9.89621	0.635581	3.77749	1.24643	0.271244	1.07221	0.860222	1547.11	14.7479	1587.97	10.0073	1642.64	11.7953	1642.64	11.7953	94.1845
101517AL1-306	346.598	3662.35	1.65463	17.53	4.16096	0.0337257	4.43892	0.00428973	1.54609	0.348303	27.5942	0.425719	33.6797	1.47049	492.312	91.8065	27.5942	0.425719	NA
101517AL1-308	111.01	89431.9	2.21507	11.7236	0.649641	2.30517	1.0637	0.196088	0.842278	0.791835	1154.27	8.90146	1213.88	7.53299	1321.46	12.5864	1321.46	12.5864	87.3478
101517AL1-309	254.482	367677	2.35941	4.849	0.52286	15.965	0.980261	0.561707	0.829174	0.845871	2873.68	19.2254	2874.71	9.36697	2875.42	8.4935	2875.42	8.4935	99.9397
101517AL1-311	130.818	584763	61.4467	18.2565	1.0982	0.482529	1.34522	0.0639188	0.776911	0.577532	399.414	3.00891	399.806	4.44578	402.055	24.5982	399.414	3.00891	NA
101517AL1-312	181.371	146422	2.29487	13.4186	0.635669	1.75449	0.969299	0.170823	0.731755	0.754932	1016.64	6.88237	1028.82	6.26907	1054.82	12.8226	1054.82	12.8226	96.3802
101517AL1-313	219.491	17497.5	1.14623	16.5141	3.64953	0.0358801	3.9207	0.0042993	1.43278	0.36544	27.6557	0.395396	35.7937	1.37892	622.476	78.7568	27.6557	0.395396	NA
101517AL1-314	333.693	2822.65	1.73916	23.7528	2.81166	0.0242908	3.00141	0.00418644	1.05026	0.349921	26.9312	0.282256	24.3697	0.722726	NA	NA	26.9312	0.282256	NA
Sample 101517AL2: (Lat/Long: 46.52790, -112.945)--NAD 1983 coordinate system
101517AL2-1	604.585	130660	1.62734	15.9968	0.710671	0.946638	1.26233	0.109877	1.04328	0.826469	672.032	6.65809	676.35	6.23315	690.762	15.1531	672.032	6.65809	97.2884
101517AL2-2	90.2363	180426	2.71653	9.49662	0.712755	4.04667	1.32248	0.27884	1.11398	0.842336	1585.52	15.6579	1643.63	10.7679	1718.75	13.1004	1718.75	13.1004	92.248
101517AL2-3	893.578	96673.7	2.10085	20.7717	0.81065	0.115393	1.31171	0.0173916	1.03123	0.786172	111.149	1.13639	110.887	1.37791	105.225	19.1348	111.149	1.13639	NA
101517AL2-4	242.72	192302	0.563619	10.0186	0.673863	3.86117	1.19251	0.280682	0.983863	0.825036	1594.8	13.9004	1605.6	9.61796	1619.8	12.541	1619.8	12.541	98.4565
101517AL2-5	228.227	22048.8	2.72872	12.2646	0.790546	2.03942	1.30604	0.181487	1.03961	0.795999	1075.09	10.2945	1128.77	8.89845	1233.55	15.5169	1233.55	15.5169	87.1542
101517AL2-6	219.443	4004.36	2.08237	11.4534	3.90657	0.177822	4.05828	0.0147776	1.09925	0.270867	94.5658	1.03193	166.184	6.22131	1366.5	75.2446	94.5658	1.03193	NA
101517AL2-7	278.665	435521	2.00628	11.1452	0.559836	2.98884	1.04573	0.241702	0.883253	0.844628	1395.54	11.0832	1404.78	7.95636	1418.82	10.7016	1418.82	10.7016	98.3592
101517AL2-8	131.911	1.33477e+06	0.8747	5.23436	0.463467	13.3975	1.13324	0.508833	1.03413	0.912545	2651.65	22.4817	2708.08	10.7079	2750.45	7.61778	2750.45	7.61778	96.4076
101517AL2-9	215.292	92036.8	1.77449	9.80188	0.583663	4.28299	1.14146	0.30461	0.980953	0.859385	1714.13	14.7649	1690.1	9.39659	1660.4	10.8055	1660.4	10.8055	103.236
101517AL2-11	433.793	576559	2.94656	9.19299	0.644045	4.83388	1.18115	0.322433	0.990111	0.838261	1801.6	15.5621	1790.81	9.93773	1778.25	11.7482	1778.25	11.7482	101.313
101517AL2-12	1722.17	96126.5	13.0889	13.8788	0.61432	1.4543	1.1128	0.146452	0.927865	0.833811	881.041	7.64085	911.653	6.69545	986.529	12.4825	986.529	12.4825	89.3072
101517AL2-13	1371.27	10109	2.50153	16.0662	3.71451	0.120244	3.80104	0.0140173	0.806448	0.212165	89.734	0.718644	115.294	4.14274	681.506	79.3656	89.734	0.718644	NA
101517AL2-16	358.816	4807.28	1.81269	11.4537	5.2806	0.746178	5.42579	0.0620121	1.24677	0.229787	387.851	4.69303	566.004	23.5464	1366.44	101.724	387.851	4.69303	NA
101517AL2-17	861.619	40527.9	1.81996	19.3491	1.33749	0.13097	1.682	0.0183874	1.01993	0.606379	117.456	1.18712	124.969	1.97778	270.347	30.649	117.456	1.18712	NA
101517AL2-19	422.311	176048	2.29969	10.756	0.472653	3.42903	0.903346	0.267614	0.769826	0.852194	1528.68	10.4769	1511.07	7.10156	1486.46	8.95304	1486.46	8.95304	102.84
101517AL2-20	242.593	1207.32	2.08623	5.00596	22.0815	0.555274	22.7876	0.0201689	5.62867	0.247006	128.723	7.17355	448.446	82.7922	2823.53	365.54	128.723	7.17355	NA
101517AL2-21	119.198	20789.7	2.79857	10.9191	0.908328	3.01579	1.49765	0.238934	1.19075	0.795081	1381.15	14.8036	1411.62	11.4206	1457.89	17.272	1457.89	17.272	94.7362
101517AL2-22	523.958	36904.4	1.99306	17.5675	0.772622	0.52518	1.21732	0.0669431	0.94071	0.772768	417.713	3.80486	428.606	4.25624	487.621	17.0467	417.713	3.80486	85.6635
101517AL2-23	131.111	119356	3.1708	9.12999	0.550743	4.78394	1.08453	0.316916	0.93428	0.861464	1774.65	14.4938	1782.08	9.10843	1790.78	10.0323	1790.78	10.0323	99.099
101517AL2-24	428.308	29246.6	0.897694	19.0546	1.12978	0.267289	1.61864	0.0369545	1.15913	0.716117	233.928	2.66293	240.524	3.46646	305.437	25.7329	233.928	2.66293	NA
101517AL2-26	269.297	87009.7	2.27424	12.0712	0.771149	2.32121	1.47538	0.203306	1.2578	0.852529	1193.06	13.6995	1218.79	10.4705	1264.67	15.0625	1264.67	15.0625	94.3375
101517AL2-27	811.029	83160.6	2.74532	20.9995	1.0221	0.0967504	1.4863	0.0147418	1.07907	0.726012	94.3378	1.01056	93.7723	1.33132	79.3864	24.2502	94.3378	1.01056	NA
101517AL2-28	34.3322	70644.8	2.28109	4.92657	0.572665	15.7679	1.33395	0.563644	1.20477	0.903162	2881.67	27.9957	2862.84	12.7376	2849.6	9.32846	2849.6	9.32846	101.126
101517AL2-29	270.522	128053	1.26535	12.9319	0.697391	2.03431	1.27876	0.190883	1.07185	0.838197	1126.15	11.0752	1127.06	8.70534	1128.82	13.8923	1128.82	13.8923	99.7635
101517AL2-30	392.766	744872	2.49229	9.16393	0.598751	4.8877	1.03508	0.324993	0.84433	0.815713	1814.07	13.3503	1800.14	8.72518	1784.02	10.914	1784.02	10.914	101.684
101517AL2-31	261.147	385310	1.70309	10.7581	0.741351	3.23673	1.35386	0.252656	1.13284	0.836751	1452.16	14.7294	1466	10.5025	1486.09	14.0435	1486.09	14.0435	97.7165
101517AL2-32	383.93	45021.3	2.93108	17.2956	0.616473	0.636575	1.06999	0.0798862	0.874551	0.817345	495.443	4.17059	500.183	4.22596	521.908	13.5291	495.443	4.17059	94.9294
101517AL2-33	943.963	38678.9	1.40001	16.7508	0.964555	0.451272	1.33024	0.054848	0.916063	0.688645	344.217	3.07054	378.17	4.20003	591.711	20.8918	344.217	3.07054	NA
101517AL2-34	1731.31	37984.3	2.7442	19.5709	1.28791	0.111071	1.56045	0.0157724	0.881067	0.564624	100.882	0.881918	106.944	1.58393	244.174	29.6672	100.882	0.881918	NA
101517AL2-35	441.293	8.11361e+06	1.37221	18.0438	0.508686	0.535193	1.10558	0.0700689	0.981598	0.887862	436.571	4.14348	435.25	3.91352	428.248	11.3412	436.571	4.14348	101.944
101517AL2-36	278.928	423450	1.52259	10.0287	0.617234	4.02413	0.991226	0.292821	0.775597	0.782462	1655.61	11.3245	1639.08	8.06163	1617.93	11.4897	1617.93	11.4897	102.329
101517AL2-37	79.6335	8039.58	1.43238	7.28023	2.182	6.52092	2.31998	0.344462	0.788156	0.339725	1908.1	13.0174	2048.73	20.4273	2193.39	37.93	2193.39	37.93	86.9933
101517AL2-38	119.958	12333	2.02621	17.9746	2.429	0.111337	2.96124	0.0145207	1.69378	0.571984	92.9332	1.56279	107.188	3.0123	436.805	54.1036	92.9332	1.56279	NA
101517AL2-39	45.2524	7870.17	1.77259	4.98381	2.44356	13.7743	2.65242	0.498102	1.03166	0.388952	2605.64	22.1123	2734.31	25.1144	2830.77	39.8738	2830.77	39.8738	92.0469
101517AL2-40	125.176	129600	2.98244	9.60913	0.63825	3.77963	1.26951	0.263524	1.0974	0.864429	1507.85	14.7543	1588.43	10.1938	1697.08	11.7613	1697.08	11.7613	88.8495
101517AL2-41	280.319	46920	2.63664	13.3655	0.510401	1.78224	0.982133	0.172838	0.839092	0.854357	1027.73	7.97131	1039	6.38818	1062.8	10.2667	1062.8	10.2667	96.7003
101517AL2-42	284.104	196819	2.38672	9.49667	0.55713	4.48305	1.01039	0.30891	0.842905	0.834239	1735.34	12.8239	1727.84	8.3884	1718.74	10.24	1718.74	10.24	100.966
101517AL2-43	232.374	24122.8	1.96544	8.14956	0.754008	5.69113	1.12474	0.336527	0.834573	0.742014	1869.94	13.5465	1930.02	9.71392	1995.15	13.4013	1995.15	13.4013	93.7242
101517AL2-46	137.311	1.63237e+06	3.24277	13.4805	0.706518	1.74827	1.15921	0.171002	0.919027	0.792802	1017.63	8.65149	1026.53	7.48775	1045.55	14.2686	1045.55	14.2686	97.3299
101517AL2-47	712.086	31047.9	1.69968	19.2074	1.21021	0.181361	1.52367	0.0252755	0.925719	0.60756	160.911	1.47115	169.231	2.3751	287.214	27.675	160.911	1.47115	NA
101517AL2-48	1260.26	16017.1	1.44639	18.1942	1.55129	0.117538	1.80259	0.0155167	0.918065	0.509303	99.259	0.904282	112.838	1.92506	409.705	34.7012	99.259	0.904282	NA
101517AL2-49	1165.98	182877	1.36471	9.17735	0.468886	3.89985	1.13124	0.259689	1.02949	0.910054	1488.25	13.6814	1613.65	9.14241	1781.35	8.54925	1781.35	8.54925	83.5459
101517AL2-50	533.965	24125.9	2.68036	16.7047	2.22412	0.102676	2.44327	0.012445	1.01137	0.41394	79.7308	0.801405	99.2437	2.31007	597.676	48.1985	79.7308	0.801405	NA
101517AL2-52	282.052	73484.8	2.70768	9.1477	0.56114	4.91511	1.12115	0.326237	0.970619	0.865734	1820.12	15.3915	1804.85	9.45969	1787.25	10.2243	1787.25	10.2243	101.839
101517AL2-53	25.2084	7169.17	3.13556	11.9157	1.38467	2.06869	1.68568	0.178856	0.961361	0.57031	1060.72	9.40258	1138.5	11.5389	1289.9	26.9497	1289.9	26.9497	82.2328
101517AL2-54	270.401	2.0337e+06	2.06338	7.78015	0.659327	6.18069	1.18656	0.348909	0.986514	0.831408	1929.39	16.4495	2001.72	10.3706	2077.21	11.6083	2077.21	11.6083	92.8835
101517AL2-55	147.241	130243	2.25514	8.14227	0.614837	5.87102	1.2127	0.346854	1.04529	0.861948	1919.56	17.3532	1956.96	10.5218	1996.74	10.9253	1996.74	10.9253	96.1344
101517AL2-56	314.369	15596.5	1.83259	17.6763	1.89862	0.203193	2.09831	0.0260609	0.89339	0.425767	165.848	1.46277	187.825	3.59812	473.977	42.0004	165.848	1.46277	NA
101517AL2-57	83.5725	53097	1.82014	5.36937	0.551988	12.941	0.91401	0.504174	0.728508	0.797046	2631.71	15.7411	2675.37	8.6152	2708.52	9.108	2708.52	9.108	97.1641
101517AL2-59	102.989	48232.4	1.27353	9.86423	0.644273	4.04951	1.25297	0.289837	1.07464	0.857673	1640.71	15.5669	1644.2	10.2033	1648.65	11.9474	1648.65	11.9474	99.5189
101517AL2-60	640.887	1.36136e+06	1.02545	5.11677	0.400742	13.3811	0.935204	0.496794	0.844992	0.903538	2600	18.0795	2706.93	8.83582	2787.73	6.56087	2787.73	6.56087	93.2661
101517AL2-61	516.691	375442	4.66365	12.7262	0.659582	2.10296	1.3138	0.194187	1.13623	0.864843	1144.01	11.9105	1149.78	9.04117	1160.64	13.0831	1160.64	13.0831	98.5677
101517AL2-62	191.436	51715.8	0.947904	9.70163	0.525261	4.03027	1.05946	0.283705	0.920088	0.868448	1609.99	13.1084	1640.32	8.61923	1679.4	9.7023	1679.4	9.7023	95.8669
101517AL2-63	600.33	207063	2.31458	9.54914	0.646944	4.08872	1.52247	0.283295	1.37818	0.905226	1607.94	19.6127	1652.06	12.4216	1708.61	11.9042	1708.61	11.9042	94.108
101517AL2-64	869.659	225747	5.00615	4.84506	0.33323	14.3631	0.952885	0.504935	0.892719	0.936859	2634.97	19.3087	2774	9.04589	2876.74	5.41484	2876.74	5.41484	91.5958
101517AL2-65	178.175	133439	2.73459	9.53724	0.587554	4.32026	1.22003	0.298965	1.06923	0.876397	1686.17	15.864	1697.24	10.0599	1710.9	10.8081	1710.9	10.8081	98.5546
101517AL2-66	392.793	8378.84	1.01593	21.9762	1.23138	0.0753363	1.74428	0.0120128	1.2354	0.708259	76.9781	0.945331	73.7508	1.24081	NA	NA	76.9781	0.945331	NA
101517AL2-67	111.572	106351	1.19366	6.52952	0.55159	9.3655	0.981299	0.443711	0.811601	0.827068	2367.23	16.0798	2374.46	9.00292	2380.65	9.39665	2380.65	9.39665	99.4363
101517AL2-68	372.65	87087.6	1.95491	12.6054	0.697964	2.00433	1.26218	0.183321	1.05164	0.833193	1085.09	10.5026	1116.98	8.55034	1179.57	13.8006	1179.57	13.8006	91.9906
101517AL2-69	169.109	27612.5	1.36595	9.72046	0.668353	3.92199	1.16746	0.276619	0.957213	0.819914	1574.31	13.3705	1618.23	9.44601	1675.82	12.3494	1675.82	12.3494	93.9426
101517AL2-71	161.507	50663.9	4.14115	8.56169	0.723839	5.38038	1.24427	0.334242	1.01206	0.813377	1858.91	16.3438	1881.74	10.6544	1907.01	13.0011	1907.01	13.0011	97.4774
101517AL2-72	1307.75	14938	2.07098	9.49205	0.597634	0.921648	1.06546	0.0634765	0.882069	0.827873	396.733	3.39395	663.231	5.18876	1719.64	10.9832	396.733	3.39395	NA
101517AL2-73	700.55	6.78024e+06	5.06539	13.2554	0.542176	1.87141	1.1838	0.179991	1.05234	0.888954	1066.92	10.3478	1071.03	7.83413	1079.38	10.8606	1079.38	10.8606	98.8463
101517AL2-74	811.533	29269.7	1.15681	16.7037	0.974979	0.487005	1.9495	0.0590247	1.68818	0.865957	369.692	6.06548	402.868	6.48305	597.849	21.1052	369.692	6.06548	NA
101517AL2-75	215.032	94654.3	3.25358	9.26374	0.759769	4.72053	1.37361	0.317296	1.14436	0.833104	1776.51	17.7691	1770.89	11.5098	1764.25	13.8853	1764.25	13.8853	100.695
101517AL2-77	253.33	132380	2.27537	10.7298	0.678848	3.27231	1.06031	0.25476	0.814511	0.76818	1462.98	10.6607	1474.49	8.24641	1491.09	12.8509	1491.09	12.8509	98.1147
101517AL2-79	347.843	31474.2	2.04391	19.7575	1.37923	0.104526	1.83993	0.0149845	1.2178	0.661876	95.8799	1.15899	100.945	1.76798	222.268	31.8984	95.8799	1.15899	NA
101517AL2-80	222.261	302743	2.27772	9.26082	0.624865	4.61522	1.33099	0.31012	1.17519	0.882946	1741.3	17.9328	1752.02	11.1083	1764.83	11.419	1764.83	11.419	98.6666
101517AL2-81	606.34	1.54425e+06	2.15322	11.12	0.630813	3.11758	1.07786	0.251542	0.873984	0.810854	1446.42	11.3237	1437.04	8.28658	1423.15	12.0513	1423.15	12.0513	101.635
101517AL2-82	1407.2	174182	3.92144	13.1537	0.64102	1.81083	1.01872	0.172828	0.791758	0.77721	1027.67	7.52125	1049.38	6.66398	1094.84	12.8154	1094.84	12.8154	93.8652
101517AL2-83	687.19	5177.6	2.03068	14.0915	4.97607	0.148122	5.04028	0.0151448	0.801964	0.159111	96.8979	0.771275	140.253	6.60272	955.495	101.825	96.8979	0.771275	NA
101517AL2-85	151.964	76923.6	1.9026	9.40514	0.777031	4.41707	1.24206	0.30143	0.968981	0.780143	1698.4	14.4677	1715.54	10.2838	1736.52	14.2482	1736.52	14.2482	97.8044
101517AL2-86	384.666	57299.6	1.2665	17.9265	0.797192	0.456289	1.32021	0.0593503	1.05236	0.797109	371.673	3.80071	381.674	4.20019	442.765	17.7296	371.673	3.80071	NA
101517AL2-87	682.435	21324.3	5.65452	18.5274	1.27205	0.135901	1.46934	0.0182694	0.735427	0.500514	116.709	0.850588	129.387	1.78499	368.972	28.6367	116.709	0.850588	NA
101517AL2-88	474.427	180135	4.83421	13.4164	0.64047	1.7622	1.32478	0.171546	1.15967	0.875369	1020.62	10.9464	1031.66	8.58189	1055.15	12.9182	1055.15	12.9182	96.7276
101517AL2-89	173.9	102121	3.0425	11.3064	0.668686	2.85672	1.07455	0.234357	0.841135	0.782782	1357.29	10.2949	1370.58	8.0819	1391.33	12.8303	1391.33	12.8303	97.5535
101517AL2-90	371.253	61695.5	2.06947	11.2752	0.594061	2.86626	1.12192	0.234493	0.951735	0.848308	1358	11.654	1373.09	8.44554	1396.62	11.3902	1396.62	11.3902	97.235
101517AL2-91	180.497	712097	1.91364	10.6656	0.660304	3.28924	1.23935	0.254546	1.0488	0.846252	1461.88	13.7181	1478.51	9.65055	1502.44	12.4809	1502.44	12.4809	97.3003
101517AL2-92	942.538	278008	2.66307	10.7188	0.758064	2.93263	1.34663	0.228081	1.11299	0.826502	1324.44	13.3252	1390.37	10.1969	1493.03	14.3468	1493.03	14.3468	88.7082
101517AL2-93	470.742	92436.3	3.82353	11.2889	0.454163	3.0484	1.07928	0.249696	0.97907	0.907152	1436.91	12.6107	1419.83	8.25205	1394.3	8.71058	1394.3	8.71058	103.056
101517AL2-94	252.214	168406	1.96599	9.09736	0.704005	4.98972	1.18456	0.329366	0.952659	0.80423	1835.31	15.2157	1817.58	10.0201	1797.3	12.8138	1797.3	12.8138	102.114
101517AL2-95	306.745	105548	3.2703	9.2042	0.588677	4.80684	1.31398	0.321021	1.17474	0.894029	1794.71	18.4028	1786.1	11.0448	1776.03	10.741	1776.03	10.741	101.052
101517AL2-96	270.493	87195.8	2.76384	11.4622	0.659905	2.6705	1.30952	0.222099	1.13109	0.863745	1292.96	13.2513	1320.33	9.67438	1365.03	12.7088	1365.03	12.7088	94.7202
101517AL2-97	273.666	130900	3.50687	8.30544	0.520468	5.55553	1.16571	0.334793	1.04307	0.894793	1861.57	16.8653	1909.23	10.0312	1961.41	9.28629	1961.41	9.28629	94.9097
101517AL2-98	397.245	36599.4	9.13008	18.1609	0.744908	0.453602	1.13999	0.0597722	0.862948	0.756982	374.24	3.13754	379.799	3.61211	413.807	16.6501	374.24	3.13754	NA
101517AL2-99	177.868	27318.9	2.33497	12.99	0.551352	1.96653	1.0325	0.185352	0.872969	0.845488	1096.15	8.79967	1104.12	6.94992	1119.86	11.0033	1119.86	11.0033	97.8825
101517AL2-101	330.184	88901.8	2.41154	20.1216	0.87604	0.176134	1.21049	0.0257154	0.835364	0.690106	163.677	1.35008	164.728	1.84067	179.845	20.4218	163.677	1.35008	NA
101517AL2-102	55.3618	112972	2.65009	14.0401	0.890989	1.55343	1.34591	0.158252	1.00877	0.749508	947.053	8.88499	951.856	8.31427	962.999	18.2089	962.999	18.2089	98.3441
101517AL2-103	222.263	10225.2	2.89078	17.3433	1.42301	0.143886	1.69368	0.0181067	0.91847	0.542294	115.679	1.053	136.499	2.1632	515.852	31.2598	115.679	1.053	NA
101517AL2-104	217.042	445072	2.52876	9.23476	0.42806	4.70304	1.09418	0.315131	1.00697	0.920299	1765.91	15.5546	1767.78	9.16224	1769.98	7.81747	1769.98	7.81747	99.7702
101517AL2-105	266.6	233137	2.29623	8.8273	0.513958	5.14627	1.07738	0.329616	0.946883	0.878878	1836.52	15.132	1843.78	9.15989	1851.97	9.29059	1851.97	9.29059	99.1659
101517AL2-106	334.431	38129.1	1.9216	12.3453	1.03987	1.89725	1.28581	0.169948	0.756291	0.588181	1011.82	7.08201	1080.13	8.54981	1220.63	20.4384	1220.63	20.4384	82.8937
101517AL2-107	280.272	90065.4	1.31834	9.82483	0.474257	3.99553	1.33878	0.284831	1.25196	0.935152	1615.65	17.8917	1633.29	10.873	1656.06	8.78453	1656.06	8.78453	97.5594
101517AL2-108	288.533	1.33456e+06	1.38624	6.25021	0.685582	10.443	1.36855	0.473594	1.18445	0.865474	2499.3	24.5395	2474.87	12.6824	2454.85	11.5915	2454.85	11.5915	101.811
101517AL2-109	568.859	30560.9	2.02691	19.7926	1.03461	0.105859	1.47317	0.0152027	1.04872	0.711879	97.2653	1.01238	102.171	1.4319	218.171	23.9249	97.2653	1.01238	NA
101517AL2-110	533.305	20044.1	1.85454	19.5505	1.48604	0.108296	1.89235	0.0153623	1.17162	0.619134	98.2789	1.14272	104.405	1.87753	246.598	34.2421	98.2789	1.14272	NA
101517AL2-112	140.825	105246	3.08267	9.76627	0.801154	4.02355	1.26936	0.285119	0.984593	0.775662	1617.09	14.0818	1638.97	10.3235	1667.13	14.82	1667.13	14.82	96.9986
101517AL2-113	511.449	92099.1	2.55595	13.1313	0.625261	1.78442	1.19827	0.170017	1.02221	0.853067	1012.2	9.5754	1039.79	7.79752	1098.26	12.4941	1098.26	12.4941	92.1644
101517AL2-114	280.869	94186.1	0.7664	9.87684	0.897713	3.89095	3.5495	0.278844	3.4341	0.967489	1585.54	48.2707	1611.81	28.6797	1646.28	16.6525	1646.28	16.6525	96.3105
101517AL2-115	191.883	15830.9	1.69371	20.79	1.74357	0.105359	2.07362	0.0158932	1.12244	0.541294	101.649	1.132	101.711	2.00691	103.143	41.207	101.649	1.132	NA
101517AL2-116	279.116	179122	1.58329	8.51272	0.664549	4.54663	1.22972	0.280831	1.03469	0.841404	1595.55	14.6246	1739.54	10.2356	1917.31	11.9195	1917.31	11.9195	83.218
101517AL2-118	115.739	105882	3.52242	12.0175	0.602514	2.34656	0.855096	0.204613	0.606767	0.709589	1200.05	6.64394	1226.51	6.08811	1273.33	11.7359	1273.33	11.7359	94.2456
101517AL2-121	289.579	194126	2.82915	11.5232	0.659388	2.74188	1.33419	0.22925	1.15986	0.869336	1330.57	13.9442	1339.89	9.92708	1354.79	12.7165	1354.79	12.7165	98.2117
101517AL2-122	183.58	68874.2	1.43382	4.98573	0.531751	12.1	2.35826	0.437727	2.29753	0.974247	2340.46	45.0934	2612.19	22.121	2830.14	8.67324	2830.14	8.67324	82.6975
101517AL2-123	205.323	34774.1	2.45656	9.50112	0.96796	4.18335	1.23454	0.288394	0.766255	0.62068	1633.5	11.0568	1670.76	10.1173	1717.88	17.7914	1717.88	17.7914	95.088
101517AL2-124	360.17	127471	1.79411	18.5083	1.05366	0.131544	1.54459	0.0176654	1.12941	0.731204	112.885	1.26384	125.484	1.82324	371.288	23.7291	112.885	1.26384	NA
101517AL2-126	1843.73	14390.2	1.34919	18.3989	0.945527	0.0788599	1.24463	0.0105278	0.809374	0.650292	67.5117	0.543571	77.0725	0.923766	384.619	21.2437	67.5117	0.543571	NA
101517AL2-127	366.398	8402.93	3.42678	16.5923	1.153	0.176642	1.79827	0.0212661	1.37999	0.767396	135.652	1.85243	165.167	2.74117	612.288	24.9209	135.652	1.85243	NA
101517AL2-129	121.896	199386	1.20702	4.53504	0.426621	17.9065	0.86232	0.589223	0.749394	0.869043	2986.27	17.9112	2984.72	8.29292	2983.68	6.86424	2983.68	6.86424	100.087
101517AL2-130	366.926	26463.1	1.30736	19.7209	1.53708	0.107851	1.7891	0.0154326	0.915571	0.51175	98.7249	0.897011	103.998	1.76851	226.564	35.524	98.7249	0.897011	NA
101517AL2-131	257.526	2.76098e+06	4.54354	10.6954	0.599527	3.38339	1.10127	0.262565	0.923778	0.838829	1502.95	12.3842	1500.56	8.63131	1497.16	11.3401	1497.16	11.3401	100.387
101517AL2-132	735.813	96788.6	2.8734	12.89	0.5088	2.09696	1.01875	0.196125	0.882599	0.866352	1154.47	9.32908	1147.81	7.00424	1135.27	10.1419	1135.27	10.1419	101.691
101517AL2-133	148.566	98018.8	1.21741	5.49501	0.536613	12.8348	1.18238	0.511736	1.0536	0.891083	2664.04	22.9915	2667.6	11.1384	2670.3	8.88602	2670.3	8.88602	99.7656
101517AL2-136	184.017	107246	1.46392	12.6754	0.718236	1.96107	1.1935	0.180361	0.953191	0.798654	1068.94	9.38914	1102.25	8.02611	1168.61	14.2427	1168.61	14.2427	91.4712
101517AL2-137	409.696	244726	1.60681	9.42871	0.475246	4.48795	1.05538	0.307035	0.942319	0.892873	1726.1	14.2698	1728.75	8.76369	1731.93	8.72043	1731.93	8.72043	99.6632
101517AL2-138	831.865	75561.7	0.893189	17.6801	0.646026	0.523493	1.12672	0.0671557	0.923124	0.819299	418.997	3.74484	427.482	3.93116	473.51	14.2977	418.997	3.74484	88.4873
101517AL2-139	159.479	119749	2.27943	11.4065	0.582127	2.93077	1.07441	0.242562	0.903041	0.8405	1400	11.364	1389.89	8.13416	1374.39	11.1953	1374.39	11.1953	101.863
101517AL2-140	439.565	106305	2.04885	10.6727	0.654739	3.1445	1.17	0.243507	0.969648	0.828759	1404.91	12.2404	1443.65	9.01378	1501.18	12.3778	1501.18	12.3778	93.5865
101517AL2-141	562.656	916766	3.32614	9.53078	0.644802	4.43933	1.14694	0.306997	0.948529	0.827007	1725.91	14.3625	1719.71	9.50509	1712.15	11.8595	1712.15	11.8595	100.804
101517AL2-142	1369.86	42467.4	3.73204	18.0691	0.601298	0.332109	1.06698	0.0435416	0.881414	0.826082	274.748	2.37079	291.174	2.70102	425.119	13.4137	274.748	2.37079	NA
101517AL2-144	144.897	237658	3.04613	9.99057	0.706269	3.80035	1.23182	0.275487	1.00924	0.819309	1568.59	14.0521	1592.82	9.90245	1625.01	13.1353	1625.01	13.1353	96.5283
101517AL2-145	944.528	90904.4	3.54174	17.4238	0.771823	0.536991	1.05876	0.0678887	0.724751	0.684527	423.423	2.97015	436.439	3.756	505.684	16.9651	423.423	2.97015	83.7328
101517AL2-147	162.725	151357	2.25732	13.5878	0.69368	1.55475	1.09474	0.153284	0.846912	0.773621	919.345	7.25633	952.383	6.76486	1029.5	14.044	1029.5	14.044	89.3002
101517AL2-148	922.339	62278.6	1.29938	12.9958	0.57642	1.59419	2.84767	0.150325	2.78872	0.979299	902.785	23.4928	967.94	17.7706	1118.99	11.5085	1118.99	11.5085	80.6784
101517AL2-149	123.592	371534	1.37962	13.009	0.894245	1.89726	1.22407	0.179085	0.835861	0.682856	1061.97	8.18403	1080.13	8.13924	1116.97	17.8637	1116.97	17.8637	95.0768
101517AL2-151	183.127	8182.08	3.02532	21.3359	1.78652	0.0989571	2.10527	0.0153196	1.11378	0.529044	98.0074	1.08333	95.8132	1.92488	41.5535	42.7054	98.0074	1.08333	NA
101517AL2-152	351.527	438228	2.91177	9.17449	0.562007	4.7521	1.14492	0.316341	0.997487	0.871232	1771.84	15.453	1776.48	9.60452	1781.92	10.2468	1781.92	10.2468	99.4339
101517AL2-153	266.603	121767	3.69778	9.43654	0.711489	4.5345	1.64868	0.310477	1.48726	0.902089	1743.06	22.7147	1737.32	13.7165	1730.41	13.0562	1730.41	13.0562	100.731
101517AL2-154	2161.95	13604.1	2.5596	17.2426	1.19504	0.0850962	1.50605	0.0106463	0.916555	0.608582	68.2679	0.622411	82.925	1.19925	528.678	26.1962	68.2679	0.622411	NA
101517AL2-155	1327.59	182696	1.76696	18.9605	0.682431	0.322698	1.30884	0.0443949	1.11685	0.853312	280.017	3.06042	283.976	3.24231	316.673	15.5249	280.017	3.06042	NA
101517AL2-156	64.5142	20318.2	2.02854	11.1011	0.721117	3.097	1.06619	0.249455	0.785339	0.736583	1435.67	10.1076	1431.95	8.18371	1426.41	13.7705	1426.41	13.7705	100.649
101517AL2-157	309.156	91090	1.5229	10.4987	0.626184	3.40137	1.28224	0.259106	1.11894	0.872646	1485.27	14.8437	1504.71	10.0619	1532.18	11.7878	1532.18	11.7878	96.9383
101517AL2-158	510.414	1.01249e+06	6.98084	8.92201	0.533374	5.15947	1.12841	0.334007	0.994391	0.881235	1857.77	16.0499	1845.96	9.59776	1832.65	9.66619	1832.65	9.66619	101.371
101517AL2-159	552.512	89248.8	1.97838	11.561	0.577953	2.75218	0.978004	0.230867	0.788963	0.806707	1339.04	9.53951	1342.68	7.28402	1348.46	11.1558	1348.46	11.1558	99.3013
101517AL2-160	1385.01	40854.4	35.2377	13.0044	0.824302	1.82201	1.18763	0.171922	0.854986	0.719907	1022.69	8.08555	1053.41	7.78598	1117.66	16.4508	1117.66	16.4508	91.5027
101517AL2-161	430.17	150215	6.25923	5.57237	0.698514	12.466	1.36589	0.504026	1.17377	0.859345	2631.08	25.3573	2640.16	12.8398	2647.12	11.5895	2647.12	11.5895	99.3939
101517AL2-162	194.792	95494.3	1.82087	9.82555	0.547357	3.99588	1.04306	0.284877	0.887909	0.851251	1615.88	12.6906	1633.36	8.47133	1655.93	10.139	1655.93	10.139	97.5814
101517AL2-163	746.179	57111.2	1.97373	12.5594	0.858641	1.9189	1.33199	0.174868	1.0183	0.764496	1038.88	9.77048	1087.69	8.89152	1186.79	16.9594	1186.79	16.9594	87.5368
101517AL2-165	810.555	35633.1	1.53362	18.8503	1.39922	0.102497	1.6856	0.014019	0.939912	0.557612	89.7446	0.837675	99.0784	1.59117	329.904	31.7421	89.7446	0.837675	NA
101517AL2-166	247.084	397946	2.90344	9.22485	0.592482	4.69947	1.01474	0.314555	0.823806	0.811842	1763.08	12.7075	1767.15	8.49587	1771.94	10.8159	1771.94	10.8159	99.5001
101517AL2-168	791.915	32827.5	1.68318	17.3617	0.963707	0.42656	1.51123	0.0537355	1.16408	0.770286	337.415	3.82675	360.731	4.58831	513.546	21.1644	337.415	3.82675	NA
101517AL2-169	576.514	870650	4.94915	9.06909	0.864085	4.50922	1.49612	0.296724	1.22136	0.816355	1675.04	18.0165	1732.67	12.4345	1802.97	15.7148	1802.97	15.7148	92.9049
101517AL2-170	437.672	117239	1.86884	19.9869	1.71743	0.104768	1.97429	0.0151937	0.973793	0.493236	97.208	0.939503	101.168	1.90108	195.524	39.9297	97.208	0.939503	NA
101517AL2-171	158.491	27414.8	2.33642	11.5591	0.806235	2.64777	1.34787	0.222071	1.08016	0.801381	1292.81	12.6532	1314.02	9.93447	1348.79	15.5624	1348.79	15.5624	95.8499
101517AL2-172	40.2623	6304.76	1.06078	14.281	1.22818	1.52031	1.49606	0.157536	0.854263	0.571009	943.067	7.4947	938.603	9.16365	928.158	25.2197	928.158	25.2197	101.606
101517AL2-173	166.959	45577.1	2.51778	13.1036	0.680969	1.94049	1.28094	0.184497	1.08494	0.846985	1091.5	10.8938	1095.17	8.58342	1102.45	13.6364	1102.45	13.6364	99.0061
101517AL2-174	277.005	160106	2.08292	9.03672	0.734945	4.85323	1.31294	0.318222	1.08796	0.828647	1781.04	16.9307	1794.18	11.0542	1809.47	13.3551	1809.47	13.3551	98.429
101517AL2-175	222.555	109122	4.51486	19.8778	1.19605	0.223087	1.67869	0.0321758	1.1779	0.701681	204.151	2.36702	204.476	3.10898	208.239	27.7541	204.151	2.36702	NA
101517AL2-177	128.812	24312.9	2.31577	15.5742	1.07905	0.975932	1.42233	0.110284	0.926644	0.651497	674.4	5.9335	691.516	7.13321	747.569	22.8018	674.4	5.9335	90.2124
101517AL2-178	2040.58	29115	3.42885	20.3973	0.735609	0.125542	1.22413	0.0185802	0.978452	0.799305	118.677	1.15057	120.084	1.38639	148.078	17.2239	118.677	1.15057	NA
101517AL2-179	109.946	119366	2.47365	5.89367	0.590579	11.2862	0.946593	0.48264	0.739766	0.781504	2538.75	15.5239	2547.07	8.82946	2553.68	9.88708	2553.68	9.88708	99.4156
101517AL2-180	377.728	7895.66	2.16134	15.9677	3.9377	0.148261	4.12339	0.0171774	1.22349	0.29672	109.792	1.33192	140.376	5.406	694.66	83.9568	109.792	1.33192	NA
101517AL2-181	412.657	1.54604e+06	0.993731	13.5516	0.614623	1.73165	0.983219	0.17027	0.767436	0.780534	1013.6	7.198	1020.36	6.32879	1034.89	12.4354	1034.89	12.4354	97.9421
101517AL2-182	484.435	193626	3.00121	9.3453	0.621237	4.61509	1.10941	0.31294	0.919157	0.828512	1755.16	14.1229	1752	9.25884	1748.22	11.3744	1748.22	11.3744	100.397
101517AL2-183	208.091	96981.3	1.54338	10.8075	0.663579	3.11633	1.01079	0.244374	0.762465	0.754328	1409.4	9.65255	1436.73	7.77018	1477.42	12.5849	1477.42	12.5849	95.3959
101517AL2-185	96.1413	102530	4.80933	5.85446	0.56924	11.2162	1.29891	0.476453	1.16753	0.898856	2511.8	24.2879	2541.26	12.1099	2564.85	9.52242	2564.85	9.52242	97.9314
101517AL2-186	123.194	47163.2	2.30644	9.7993	0.494011	4.04909	0.942587	0.287899	0.80276	0.851656	1631.02	11.5681	1644.12	7.67545	1660.88	9.1449	1660.88	9.1449	98.202
101517AL2-187	440.889	45021.3	1.90907	16.6194	1.98298	0.126128	2.37277	0.0152096	1.303	0.549149	97.3089	1.25842	120.613	2.69842	608.75	42.8641	97.3089	1.25842	NA
101517AL2-188	551.914	401259	2.19907	9.97174	0.506297	4.10224	1.22727	0.296811	1.11797	0.91094	1675.47	16.495	1654.75	10.0195	1628.52	9.41144	1628.52	9.41144	102.883
101517AL2-189	134.372	97468.8	1.80098	11.6271	0.628013	2.50667	1.13023	0.211473	0.939696	0.831417	1236.66	10.5742	1273.97	8.20371	1337.46	12.14	1337.46	12.14	92.463
101517AL2-190	110.851	19783.4	2.27834	8.86098	0.938186	4.5342	1.73339	0.291521	1.45755	0.840865	1649.13	21.2086	1737.27	14.4212	1845.08	16.9752	1845.08	16.9752	89.3799
101517AL2-191	439.123	321957	2.27449	12.6164	0.710332	2.19228	1.18862	0.200687	0.95302	0.801786	1179.01	10.2686	1178.59	8.28853	1177.84	14.0649	1177.84	14.0649	100.099
101517AL2-192	417.47	6004.99	1.17755	15.428	4.21602	0.138259	4.36138	0.0154771	1.11659	0.256018	99.0078	1.09707	131.492	5.37911	767.473	88.8373	99.0078	1.09707	NA
101517AL2-193	754.029	48961.9	2.77997	19.0926	1.00285	0.123804	1.48571	0.0171508	1.09619	0.737822	109.624	1.19153	118.514	1.6619	300.906	22.8647	109.624	1.19153	NA
101517AL2-194	282.807	12500.6	2.35783	15.5556	2.75281	0.0385433	3.03783	0.00435034	1.28468	0.422896	27.9833	0.358717	38.4008	1.14477	750.101	58.1543	27.9833	0.358717	NA
101517AL2-195	424.848	215591	2.59712	17.9253	0.717619	0.536743	1.15522	0.0698102	0.905289	0.783653	435.012	3.80818	436.275	4.09695	442.922	15.9698	435.012	3.80818	98.2143
101517AL2-196	1719.13	20894.9	1.28629	20.035	1.01363	0.106817	1.27668	0.0155281	0.776189	0.607973	99.3311	0.765087	103.049	1.25106	189.933	23.6049	99.3311	0.765087	NA
101517AL2-198	687.628	229731	41.5993	5.47025	0.550095	10.9458	1.1384	0.434451	0.996674	0.875501	2325.75	19.4593	2518.53	10.5919	2677.77	9.10277	2677.77	9.10277	86.854
101517AL2-199	68.2753	36554.4	1.6812	2.99283	0.49322	33.7915	1.1874	0.733799	1.08012	0.909649	3547.56	29.4693	3603.97	11.7106	3635.47	7.55183	3635.47	7.55183	97.5817
101517AL2-202	475.974	256466	3.59356	12.7345	0.509921	2.14839	1.02965	0.198511	0.894515	0.868757	1167.31	9.55098	1164.53	7.13429	1159.35	10.1297	1159.35	10.1297	100.687
101517AL2-203	329.183	6642.39	2.55827	16.4661	2.15742	0.130208	2.46178	0.0155566	1.18572	0.48165	99.5122	1.17087	124.284	2.87978	628.758	46.5049	99.5122	1.17087	NA
101517AL2-205	785.741	99359.2	1.58692	20.7798	1.04972	0.0963792	1.41258	0.0145315	0.945233	0.669156	93.0022	0.872777	93.4286	1.26085	104.307	24.8244	93.0022	0.872777	NA
101517AL2-206	864.491	21189.1	11.8994	18.2708	1.11274	0.166965	1.6454	0.0221346	1.21209	0.736653	141.133	1.69207	156.782	2.3904	400.297	24.9315	141.133	1.69207	NA
101517AL2-208	81.0329	2480.8	2.08383	9.26605	2.87664	0.443459	3.04991	0.029815	1.01336	0.332258	189.391	1.89128	372.688	9.51433	1763.8	52.5826	189.391	1.89128	NA
101517AL2-209	82.008	150853	2.65409	11.4831	0.66931	2.68209	1.17747	0.223471	0.968739	0.822731	1300.19	11.4065	1323.53	8.70901	1361.5	12.896	1361.5	12.896	95.4968
101517AL2-211	173.475	55163.6	0.455339	14.0352	0.686991	1.57363	1.08653	0.160253	0.841776	0.774739	958.185	7.49496	959.858	6.7458	963.71	14.0294	963.71	14.0294	99.4267
101517AL2-212	305.112	111952	2.90601	12.8459	0.758137	2.01869	1.39737	0.188157	1.17383	0.840026	1111.38	11.9831	1121.82	9.48865	1142.06	15.0557	1142.06	15.0557	97.3135
101517AL2-213	1021.51	73927.6	2.50298	18.8541	1.38656	0.077748	1.7022	0.0106361	0.987393	0.580068	68.2028	0.66988	76.0254	1.24685	329.446	31.4586	68.2028	0.66988	NA
101517AL2-215	23.8827	58181.4	1.06477	8.4031	0.880367	5.35387	1.40888	0.326434	1.09995	0.780727	1821.07	17.4502	1877.51	12.0546	1940.52	15.748	1940.52	15.748	93.8444
101517AL2-216	672.596	280414	0.644978	8.13701	0.633794	5.80092	1.37558	0.342491	1.22087	0.887531	1898.64	20.0783	1946.55	11.9142	1997.89	11.2607	1997.89	11.2607	95.0323
101517AL2-217	37.5301	18140.5	1.45964	13.316	1.24299	1.87266	1.60678	0.180934	1.01819	0.633683	1072.08	10.0564	1071.47	10.6359	1070.26	24.9706	1070.26	24.9706	100.17
101517AL2-219	74.3402	12622.5	1.35856	11.5047	0.988826	2.22024	1.37826	0.185337	0.96012	0.696616	1096.06	9.67751	1187.44	9.64909	1357.89	19.0627	1357.89	19.0627	80.7182
101517AL2-220	98.7026	309819	1.61591	8.55598	0.673201	5.54095	1.20678	0.343987	1.00156	0.829942	1905.82	16.525	1906.97	10.3804	1908.21	12.0898	1908.21	12.0898	99.8747
101517AL2-221	395.442	217898	3.56661	12.392	0.660126	2.32067	1.37101	0.208661	1.20162	0.876452	1221.68	13.3728	1218.63	9.72904	1213.24	12.9893	1213.24	12.9893	100.695
101517AL2-222	842.435	29494	2.47876	10.3044	1.37128	2.92048	1.60242	0.218355	0.829058	0.517378	1273.18	9.57841	1387.23	12.1211	1567.27	25.6981	1567.27	25.6981	81.2352
101517AL2-223	111.5	30767.5	132.957	7.84197	0.553613	6.33979	1.15888	0.360735	1.01809	0.878514	1985.66	17.3988	2023.97	10.1642	2063.27	9.76427	2063.27	9.76427	96.2383
101517AL2-224	504.699	28412.3	2.44811	20.2071	1.00896	0.222458	1.42164	0.0326167	1.00153	0.70449	206.904	2.03932	203.953	2.62685	169.951	23.5599	206.904	2.03932	NA
101517AL2-225	513.859	541636	1.55819	13.3364	0.644788	1.84546	1.18731	0.178579	0.99697	0.839689	1059.21	9.73805	1061.81	7.81905	1067.18	12.9528	1067.18	12.9528	99.2524
101517AL2-226	79.5049	16234.2	2.54539	17.7465	1.36652	0.504221	1.75171	0.0649264	1.09595	0.625644	405.516	4.30733	414.555	5.96219	465.186	30.2842	405.516	4.30733	87.1729
101517AL2-227	421.036	17675.6	3.73213	20.1566	1.00017	0.125989	1.34852	0.0184263	0.904536	0.67076	117.703	1.055	120.487	1.5321	175.792	23.3308	117.703	1.055	NA
101517AL2-228	277.63	10748.3	1.85267	19.9474	1.14622	0.17964	1.58331	0.0260002	1.09227	0.689864	165.466	1.78433	167.751	2.44822	200.127	26.6233	165.466	1.78433	NA
101517AL2-229	377.185	800003	2.80842	5.04656	0.889572	14.8715	1.31398	0.544551	0.967055	0.735976	2802.47	21.979	2807.05	12.5019	2810.34	14.5418	2810.34	14.5418	99.7201
101517AL2-230	204.719	91366.9	1.54245	8.83976	0.703126	5.02373	1.04654	0.322222	0.775146	0.740678	1800.57	12.1774	1823.33	8.8625	1849.41	12.7148	1849.41	12.7148	97.3589
101517AL2-231	1131.88	94461.3	2.71339	19.5876	0.757432	0.184789	1.08654	0.026263	0.77902	0.716971	167.117	1.28515	172.173	1.72073	242.19	17.4616	167.117	1.28515	NA
101517AL2-232	237.283	275807	2.67709	9.21898	0.645462	4.84635	1.18164	0.324179	0.989767	0.837625	1810.11	15.6203	1792.98	9.9462	1773.1	11.7815	1773.1	11.7815	102.087
101517AL2-234	192.867	1.68091e+06	2.9806	8.66126	0.604071	5.36904	1.1632	0.337416	0.994051	0.854582	1874.23	16.1669	1879.93	9.95684	1886.22	10.8749	1886.22	10.8749	99.3639
101517AL2-235	50.081	50717.7	0.77508	5.47478	0.749721	11.9753	1.28314	0.475709	1.04134	0.811549	2508.55	21.6397	2602.48	12.0253	2676.4	12.4045	2676.4	12.4045	93.7285
101517AL2-236	618.382	86722.3	1.74453	18.0555	0.881022	0.392345	1.19424	0.0514002	0.806225	0.675097	323.113	2.54081	336.081	3.41698	426.796	19.6487	323.113	2.54081	NA
101517AL2-237	129.223	307499	1.57248	12.8432	0.750935	1.92853	1.37466	0.179716	1.15143	0.83761	1065.42	11.3075	1091.03	9.1921	1142.51	14.9294	1142.51	14.9294	93.253
101517AL2-238	377.048	29623.4	1.67386	19.0402	1.16646	0.188497	1.57508	0.0260414	1.05842	0.671977	165.725	1.7317	175.346	2.53652	307.141	26.5478	165.725	1.7317	NA
101517AL2-239	697.966	179804	1.54332	20.7086	0.77615	0.0976061	1.20612	0.0146661	0.923216	0.76544	93.8574	0.860229	94.5642	1.08906	112.44	18.3043	93.8574	0.860229	NA
101517AL2-240	210.096	214727	2.18775	9.37469	0.682191	4.18404	1.21257	0.284603	1.00247	0.826729	1614.5	14.3172	1670.9	9.93751	1742.47	12.4996	1742.47	12.4996	92.6563
101517AL2-242	154.775	87996.5	0.547398	9.97941	0.681283	3.74336	1.41107	0.271053	1.23571	0.875725	1546.15	16.9874	1580.69	11.3077	1627.09	12.6672	1627.09	12.6672	95.0253
101517AL2-243	224.837	128638	2.42895	9.3596	0.5003	4.47246	0.898106	0.303733	0.745852	0.830472	1709.79	11.2015	1725.88	7.45297	1745.42	9.16297	1745.42	9.16297	97.959
101517AL2-244	54.2887	28875.7	1.19456	12.4632	0.790235	1.88866	1.08046	0.170794	0.736831	0.681961	1016.49	6.92912	1077.11	7.17303	1201.92	15.5656	1201.92	15.5656	84.572
101517AL2-245	624.756	236931	1.14447	9.78719	0.602018	3.91478	0.998945	0.278005	0.797161	0.798003	1581.31	11.1785	1616.74	8.07949	1663.17	11.1414	1663.17	11.1414	95.0779
101517AL2-246	207.029	94633.8	3.4015	12.7117	0.617152	2.12359	1.13693	0.195867	0.954848	0.839847	1153.08	10.0817	1156.5	7.84854	1162.9	12.2508	1162.9	12.2508	99.1557
101517AL2-247	1567.6	92036.6	2.66433	19.6362	0.711546	0.122915	1.08943	0.0175126	0.824963	0.757241	111.916	0.915299	117.711	1.21084	236.491	16.4011	111.916	0.915299	NA
101517AL2-248	377.356	165572	1.84947	13.5502	0.653356	1.76652	1.18123	0.173681	0.984091	0.833105	1032.36	9.38764	1033.24	7.65875	1035.09	13.2169	1035.09	13.2169	99.7366
101517AL2-249	96.0882	33578.1	1.05127	9.80514	0.611676	3.99124	1.13614	0.283955	0.957425	0.842701	1611.25	13.6497	1632.42	9.22513	1659.78	11.3251	1659.78	11.3251	97.076
101517AL2-250	123.785	65606.7	1.48076	11.3846	0.585604	2.94307	1.0985	0.243112	0.929392	0.846056	1402.85	11.7169	1393.07	8.32541	1378.09	11.2565	1378.09	11.2565	101.797
101517AL2-252	187.255	335246	1.49024	5.57444	0.668308	11.9757	1.25179	0.484382	1.05847	0.84556	2546.33	22.2659	2602.5	11.7315	2646.5	11.0888	2646.5	11.0888	96.2147
101517AL2-253	385.195	61661.6	3.10654	17.5504	0.923216	0.522144	1.45279	0.0664913	1.12173	0.77212	414.982	4.50832	426.583	5.06025	489.755	20.3665	414.982	4.50832	84.7327
101517AL2-254	269.753	103929	2.23437	9.11456	0.622048	4.72086	0.935291	0.312209	0.698446	0.746768	1751.57	10.7126	1770.95	7.83692	1793.86	11.3269	1793.86	11.3269	97.6421
101517AL2-255	428.033	53426.1	2.93705	13.0986	0.631991	1.80623	1.07439	0.171667	0.868846	0.80869	1021.29	8.20624	1047.72	7.02178	1103.25	12.6556	1103.25	12.6556	92.5709
101517AL2-257	589.57	269455	4.16378	10.0902	0.484622	3.3834	1.14833	0.247709	1.04106	0.906585	1426.65	13.3236	1500.56	9.00015	1606.53	9.03572	1606.53	9.03572	88.8031
101517AL2-260	6979.16	32836.1	2.55323	19.7071	1.17816	0.0262367	1.51025	0.00375163	0.944873	0.62564	24.1393	0.227659	26.2968	0.392049	228.18	27.2083	24.1393	0.227659	NA
101517AL2-261	614.428	1.50951e+06	2.42078	12.4603	0.584444	2.28327	1.15911	0.206431	1.00098	0.863576	1209.78	11.0412	1207.13	8.18491	1202.38	11.5172	1202.38	11.5172	100.615
101517AL2-262	156.682	3244.83	1.2418	23.6977	3.08978	0.066665	3.28711	0.0114628	1.12175	0.341258	73.4739	0.819516	65.5297	2.086	NA	NA	73.4739	0.819516	NA
101517AL2-264	56.2327	5197.83	1.15485	7.85815	1.93587	5.17016	2.20954	0.294789	1.06511	0.482049	1665.42	15.6324	1847.72	18.8013	2059.63	34.1568	2059.63	34.1568	80.8601
101517AL2-265	397.491	432087	1.65714	9.95538	0.660522	3.92032	1.2113	0.283183	1.01537	0.838242	1607.37	14.4451	1617.88	9.79997	1631.57	12.274	1631.57	12.274	98.5168
101517AL2-266	1033.71	445729	19.0406	9.63645	0.527483	3.50638	1.10431	0.245168	0.970189	0.878546	1413.51	12.3143	1528.65	8.72496	1691.85	9.72794	1691.85	9.72794	83.5483
101517AL2-267	217.486	998073	1.86516	17.6169	0.896658	0.534086	1.39825	0.0682696	1.0729	0.767315	425.722	4.42001	434.518	4.94288	481.429	19.8088	425.722	4.42001	88.4289
101517AL2-268	341.28	97430.2	1.32025	16.3115	0.706993	0.76218	1.18135	0.090207	0.946444	0.801152	556.761	5.0483	575.267	5.18825	649.082	15.182	556.761	5.0483	85.7767
101517AL2-269	437.429	390073	1.86832	5.89009	0.475727	10.6157	1.14391	0.453688	1.04029	0.90942	2411.63	20.9296	2490.08	10.6155	2554.7	7.96293	2554.7	7.96293	94.3997
101517AL2-270	734.99	198793	3.66543	20.1982	1.01342	0.120609	1.50138	0.0176759	1.10775	0.737825	112.951	1.24032	115.624	1.64077	170.984	23.6726	112.951	1.24032	NA
101517AL2-271	109.433	110875	1.41185	10.9172	0.575179	3.05164	1.16176	0.24173	1.00938	0.868839	1395.69	12.6671	1420.64	8.88501	1458.23	10.9365	1458.23	10.9365	95.7107
101517AL2-272	165.496	164709	1.58339	9.09218	0.712852	4.6453	1.35211	0.306457	1.14893	0.849731	1723.25	17.3734	1757.45	11.2976	1798.34	12.9732	1798.34	12.9732	95.8244
101517AL2-273	574.075	3.94009e+06	6.51608	9.97562	0.568458	3.32896	1.22172	0.240955	1.08142	0.885157	1391.66	13.536	1487.87	9.53981	1627.8	10.5681	1627.8	10.5681	85.4935
101517AL2-274	180.585	129404	0.957014	10.162	0.623947	3.54933	1.08221	0.261707	0.884235	0.817063	1498.57	11.8234	1538.29	8.57336	1593.29	11.6535	1593.29	11.6535	94.0548
101517AL2-276	276.554	63061.6	2.77866	20.1867	1.11137	0.180069	1.58983	0.0263749	1.13685	0.715076	167.82	1.88325	168.12	2.46328	172.316	25.9408	167.82	1.88325	NA
101517AL2-277	54.7291	97057.8	0.546374	5.34144	0.668426	12.9973	1.17206	0.503732	0.962777	0.821438	2629.82	20.791	2679.46	11.0511	2717.12	11.0203	2717.12	11.0203	96.7867
101517AL2-278	431.547	96421.6	1.79738	17.5263	0.683126	0.589517	1.0871	0.0749677	0.845647	0.777895	466.015	3.80177	470.559	4.09385	492.77	15.0634	466.015	3.80177	94.5704
101517AL2-279	105.95	70983.7	1.60868	6.82395	0.507421	8.85285	0.959049	0.438335	0.813817	0.848567	2343.18	15.9879	2322.95	8.74989	2305.2	8.71265	2305.2	8.71265	101.648
101517AL2-280	703.898	653951	3.69441	5.54754	0.53513	11.0454	1.16	0.444598	1.02919	0.887234	2371.19	20.4191	2526.96	10.801	2654.53	8.87491	2654.53	8.87491	89.3263
101517AL2-281	89.7449	45362.3	2.0224	13.2506	0.88787	1.88768	1.41194	0.181489	1.09785	0.777544	1075.11	10.8713	1076.77	9.37215	1080.14	17.7979	1080.14	17.7979	99.5341
101517AL2-282	238.504	4906.02	1.85595	16.4959	4.10784	0.0323059	4.22528	0.00386674	0.989259	0.234128	24.8786	0.245639	32.2842	1.34264	624.862	88.5861	24.8786	0.245639	NA
101517AL2-284	163.77	1601.21	4.24636	6.01237	5.81704	0.427338	5.90466	0.0186425	1.01344	0.171634	119.071	1.19564	361.284	17.9521	2520.24	97.8138	119.071	1.19564	NA
101517AL2-285	249.581	128684	4.12396	12.2341	0.747718	2.02989	3.07802	0.180191	2.98582	0.970046	1068.02	29.3877	1125.58	20.9415	1238.39	14.6773	1238.39	14.6773	86.2424
101517AL2-286	499.132	7629.77	1.5753	19.2464	1.20662	0.0971538	1.57345	0.0135674	1.00986	0.64181	86.8733	0.87141	94.1457	1.41474	282.574	27.623	86.8733	0.87141	NA
101517AL2-287	78.0877	70197.4	3.98752	10.5789	0.613495	3.39937	1.25981	0.260932	1.10034	0.873416	1494.61	14.6785	1504.25	9.88454	1517.84	11.5709	1517.84	11.5709	98.4691
101517AL2-288	312.826	205739	3.14011	8.48052	0.680342	5.22192	1.4828	0.321322	1.31751	0.888528	1796.18	20.6541	1856.2	12.6369	1924.1	12.193	1924.1	12.193	93.3516
101517AL2-289	59.176	477462	0.325475	8.08904	0.746968	5.90085	1.07813	0.346337	0.777428	0.721092	1917.08	12.8921	1961.36	9.36103	2008.39	13.2558	2008.39	13.2558	95.4538
101517AL2-290	298.124	123863	1.09224	9.49541	0.578934	3.85447	1.10923	0.265562	0.946167	0.852992	1518.24	12.7988	1604.2	8.94307	1718.99	10.6404	1718.99	10.6404	88.3215
101517AL2-291	393.725	96216	8.59693	10.8881	0.617663	3.0828	1.24043	0.243549	1.07571	0.86721	1405.12	13.5812	1428.42	9.51047	1463.3	11.7363	1463.3	11.7363	96.0244
101517AL2-292	596.213	887869	3.74835	10.782	0.550828	2.8141	1.06255	0.220154	0.908624	0.855137	1282.69	10.5685	1359.3	7.9604	1481.89	10.4402	1481.89	10.4402	86.5578
101517AL2-293	317.991	350729	1.87746	10.2912	0.524476	3.6318	1.07368	0.271192	0.936866	0.872573	1546.85	12.8843	1556.53	8.54846	1569.67	9.82427	1569.67	9.82427	98.5463
101517AL2-294	407.164	175973	2.36501	17.1042	1.36464	0.0866566	1.72174	0.0107546	1.04983	0.60975	68.9583	0.720087	84.3841	1.39414	546.262	29.8365	68.9583	0.720087	NA
101517AL2-295	398.919	2.97339e+06	3.64899	9.49702	0.811195	4.46878	1.38037	0.307938	1.11686	0.809104	1730.55	16.951	1725.19	11.4536	1718.68	14.9099	1718.68	14.9099	100.691
101517AL2-296	922.034	17465.5	1.07434	17.7905	1.2619	0.118681	1.6033	0.01532	0.989039	0.616876	98.0103	0.962028	113.876	1.72712	459.718	27.9823	98.0103	0.962028	NA
101517AL2-297	1113.58	62925.3	3.76575	21.2132	0.980198	0.0706326	1.31688	0.0108718	0.879421	0.667807	69.7056	0.609704	69.2996	0.882147	55.3231	23.3638	69.7056	0.609704	NA
101517AL2-298	192.347	40237.4	3.16645	11.1352	0.910101	2.95929	1.30736	0.239097	0.938571	0.717911	1382	11.675	1397.23	9.92225	1420.54	17.3933	1420.54	17.3933	97.2875
101517AL2-299	92.0358	77410.5	3.63869	9.03224	0.559371	4.85604	0.997358	0.318248	0.825728	0.827916	1781.17	12.8506	1794.66	8.39787	1810.37	10.163	1810.37	10.163	98.387
101517AL2-301	238.443	39249.5	1.21589	7.65498	0.565431	6.69582	1.08566	0.371908	0.926791	0.853667	2038.37	16.1962	2072.07	9.59146	2105.73	9.92276	2105.73	9.92276	96.8015
101517AL2-302	182.05	430609	3.07833	12.8007	0.736489	2.02422	1.14013	0.188009	0.870328	0.763361	1110.58	8.87892	1123.68	7.74882	1149.07	14.6083	1149.07	14.6083	96.6507
101517AL2-303	502.67	91777	2.93357	12.8859	0.705193	2.08786	1.73122	0.195211	1.58109	0.913277	1149.54	16.6469	1144.82	11.8863	1135.91	14.0145	1135.91	14.0145	101.201
101517AL2-304	83.8039	98647.3	1.23306	16.7844	1.13141	0.782269	1.48729	0.0952688	0.965366	0.649079	586.623	5.41303	586.777	6.62847	587.352	24.5484	586.623	5.41303	99.8758
101517AL2-306	580.748	1783.23	2.57542	7.12946	3.796	0.353998	3.88275	0.0183124	0.816166	0.210203	116.981	0.946151	307.723	10.3078	2229.69	65.7443	116.981	0.946151	NA
101517AL2-307	570.33	313365	4.99199	9.62247	0.5517	3.90906	1.16244	0.272927	1.02318	0.880198	1555.64	14.1421	1615.56	9.39909	1694.52	10.1694	1694.52	10.1694	91.8043
101517AL2-308	128.272	2.37766e+06	1.95879	5.33918	0.571824	12.8188	0.950728	0.496601	0.75954	0.798904	2599.17	16.2469	2666.42	8.95518	2717.82	9.42702	2717.82	9.42702	95.6345
101517AL2-309	434.566	429875	2.75595	9.19537	0.465699	4.74556	1.26327	0.316624	1.1743	0.92957	1773.22	18.2046	1775.32	10.5949	1777.78	8.49486	1777.78	8.49486	99.7437
101517AL2-310	357.991	191240	3.55179	10.4715	0.854991	2.9447	1.42935	0.223736	1.14544	0.801372	1301.59	13.5003	1393.49	10.8346	1537.07	16.0854	1537.07	16.0854	84.6797
101517AL2-311	224.23	74105.4	1.3718	11.6596	0.833049	2.55529	1.41003	0.216178	1.13763	0.806816	1261.65	13.0357	1287.95	10.2905	1332.07	16.1163	1332.07	16.1163	94.7134
101517AL2-312	120.927	90693	3.10998	12.8881	0.718326	2.05509	1.12096	0.19218	0.860559	0.767697	1133.17	8.94262	1133.99	7.6566	1135.58	14.279	1135.58	14.279	99.7884
101517AL2-314	290.735	84963.1	3.71772	13.3265	0.658084	1.82706	1.12632	0.176667	0.914072	0.811555	1048.74	8.84711	1055.23	7.39126	1068.68	13.227	1068.68	13.227	98.1342
Sample 101517AL3: (Lat/Long: 46.4728, -112.925)--NAD 1983 coordinate system
101517AL3-0	280.446	253638	2.38468	11.482	0.718776	2.84741	1.41824	0.237223	1.22261	0.862059	1372.24	15.1118	1368.13	10.6581	1361.69	13.8487	1361.69	13.8487	100.775
101517AL3-2	813.779	51836	1.68152	17.9296	2.0853	0.0315847	2.48145	0.00410899	1.34503	0.542035	26.434	0.354817	31.5745	0.771448	442.38	46.393	26.434	0.354817	NA
101517AL3-4	2440.34	24559.4	31.6402	18.339	2.07358	0.0809767	2.57606	0.0107752	1.5285	0.59335	69.0897	1.0504	79.0628	1.95943	391.945	46.5306	69.0897	1.0504	NA
101517AL3-5	440.288	89815.7	3.68849	14.1199	0.691506	1.59633	1.38751	0.163547	1.20291	0.866959	976.459	10.8996	968.776	8.66241	951.402	14.1482	951.402	14.1482	102.634
101517AL3-6	1690.09	99608.9	3.26516	11.5682	1.8986	0.227953	2.36344	0.0191337	1.40754	0.595546	122.179	1.70352	208.507	4.45492	1347.26	36.6564	122.179	1.70352	NA
101517AL3-7	487.514	131488	2.15195	9.59819	0.524026	4.56524	1.28062	0.317936	1.16849	0.912446	1779.64	18.1716	1742.95	10.6671	1699.18	9.6535	1699.18	9.6535	104.735
101517AL3-8	307.017	36958.7	5.21227	19.8321	1.35738	0.135559	1.71943	0.0195068	1.05544	0.613834	124.538	1.30181	129.081	2.08418	213.567	31.4611	124.538	1.30181	NA
101517AL3-9	141.181	116025	2.14434	9.45019	0.702882	4.49366	1.27679	0.308127	1.0659	0.83483	1731.48	16.1851	1729.8	10.6048	1727.76	12.9043	1727.76	12.9043	100.216
101517AL3-10	288.836	351629	1.11075	5.59575	0.59034	12.7322	1.17294	0.516949	1.01356	0.864113	2686.23	22.2661	2660.04	11.043	2640.17	9.80057	2640.17	9.80057	101.744
101517AL3-11	111.785	126268	2.16982	6.16906	0.611285	10.3805	1.37283	0.464649	1.22923	0.895395	2460.05	25.1388	2469.31	12.7153	2476.92	10.3151	2476.92	10.3151	99.3188
101517AL3-12	2591.26	64403.2	1.88522	20.446	0.845984	0.0694419	1.16149	0.0103019	0.795852	0.685197	66.0705	0.523138	68.1697	0.765793	142.489	19.8552	66.0705	0.523138	NA
101517AL3-13	88.2926	17886.4	0.864141	13.3459	0.774642	1.93883	1.44847	0.187749	1.22392	0.844978	1109.17	12.4717	1094.6	9.70326	1065.75	15.5573	1065.75	15.5573	104.075
101517AL3-14	261.478	93493.8	3.56478	9.424	0.450683	4.43267	0.970145	0.303102	0.859108	0.885546	1706.67	12.8818	1718.47	8.03762	1732.85	8.26876	1732.85	8.26876	98.4893
101517AL3-16	1165.41	1.78574e+06	2.033	11.7047	0.563119	2.40274	1.11025	0.204058	0.956845	0.861828	1197.08	10.4536	1243.42	7.96044	1324.59	10.9059	1324.59	10.9059	90.3736
101517AL3-17	257.444	108504	2.40038	17.5496	0.869987	0.547256	1.41557	0.0696859	1.11667	0.788851	434.263	4.68957	443.198	5.08385	489.864	19.1819	434.263	4.68957	88.6497
101517AL3-18	2563.23	43216.1	2.72138	20.4659	0.661305	0.0765635	1.47636	0.0113695	1.31997	0.89407	72.8788	0.956563	74.9089	1.06612	140.158	15.5383	72.8788	0.956563	NA
101517AL3-20	1552.38	17066.9	2.48853	20.4256	1.15745	0.0729809	1.50989	0.0108162	0.969572	0.642148	69.351	0.668804	71.5243	1.04278	144.78	27.1532	69.351	0.668804	NA
101517AL3-21	149.111	124373	1.42626	9.92094	0.699655	4.03234	1.1795	0.290267	0.949578	0.80507	1642.86	13.7711	1640.74	9.59682	1638.01	12.9922	1638.01	12.9922	100.296
101517AL3-23	294.845	110595	2.53677	13.4564	0.675874	1.78847	1.29382	0.174622	1.10326	0.85271	1037.53	10.5729	1041.27	8.42618	1049.15	13.643	1049.15	13.643	98.8921
101517AL3-24	40.9888	267669	0.898666	6.68869	0.819423	8.58995	1.51059	0.416888	1.26903	0.840087	2246.34	24.0699	2295.49	13.7397	2339.53	14.0207	2339.53	14.0207	96.0166
101517AL3-26	80.4129	13378.7	1.87582	13.2426	0.988717	1.66002	1.60717	0.159505	1.26705	0.788377	954.024	11.2361	993.384	10.1844	1081.33	19.83	1081.33	19.83	88.2272
101517AL3-29	502.825	28352.4	2.53507	20.5381	1.74862	0.0719618	2.05102	0.0107238	1.07191	0.522623	68.7622	0.733152	70.5594	1.39805	131.93	41.1085	68.7622	0.733152	NA
101517AL3-30	521.657	13421	0.927453	20.6189	1.60551	0.0712467	1.86919	0.0106591	0.957181	0.512085	68.3491	0.650769	69.8818	1.26229	122.637	37.821	68.3491	0.650769	NA
101517AL3-31	962.969	158911	1.52881	19.7952	0.852246	0.180351	1.53432	0.0259039	1.27586	0.831547	164.861	2.07673	168.362	2.38043	217.884	19.7052	164.861	2.07673	NA
101517AL3-32	201.784	26278	0.834813	12.7815	1.17075	2.02956	1.42251	0.188222	0.808016	0.56802	1111.74	8.25111	1125.47	9.67658	1152.04	23.2424	1152.04	23.2424	96.5014
101517AL3-33	1495.68	20374.3	2.04873	20.7354	1.02581	0.0722216	1.39883	0.0108659	0.951021	0.679869	69.6684	0.658993	70.8054	0.956703	109.404	24.2119	69.6684	0.658993	NA
101517AL3-34	331.928	221084	2.24457	11.4895	0.694239	2.57591	2.29121	0.214744	2.1835	0.95299	1254.04	24.8834	1293.82	16.7601	1360.43	13.3783	1360.43	13.3783	92.1801
101517AL3-35	1008.6	81451.8	2.20151	18.5466	0.531538	0.415439	1.00735	0.0559062	0.855699	0.849456	350.681	2.92061	352.785	3.00212	366.63	11.9749	350.681	2.92061	NA
101517AL3-36	406.981	34706.1	1.63513	19.874	1.22471	0.178609	1.68188	0.0257559	1.15274	0.685386	163.931	1.86587	166.863	2.58797	208.649	28.4191	163.931	1.86587	NA
101517AL3-37	506.387	149064	0.781842	10.1123	0.534297	3.93484	1.04797	0.288711	0.901537	0.860269	1635.08	13.02	1620.88	8.48483	1602.46	9.96719	1602.46	9.96719	102.036
101517AL3-38	2440.94	66548.7	2.80744	20.5797	0.705958	0.0712602	1.18361	0.0106408	0.95003	0.802654	68.2324	0.64481	69.8946	0.799449	127.173	16.6196	68.2324	0.64481	NA
101517AL3-39	1205.81	124961	1.52682	17.4215	0.805956	0.562396	1.49173	0.071091	1.25527	0.841484	442.726	5.37086	453.085	5.45226	505.992	17.7164	442.726	5.37086	87.4966
101517AL3-40	376.378	232075	2.14636	13.0399	0.589983	2.06928	1.20304	0.195787	1.04844	0.871492	1152.65	11.066	1138.7	8.23574	1112.19	11.7739	1112.19	11.7739	103.638
101517AL3-41	260.098	48886.3	1.29726	11.4457	0.606264	2.7313	1.33719	0.22683	1.19185	0.891314	1317.86	14.2055	1337.01	9.93906	1367.79	11.6714	1367.79	11.6714	96.3495
101517AL3-42	2597.76	44264.4	1.50962	20.652	1.53684	0.0694178	1.91998	0.0104021	1.15084	0.599402	66.7097	0.763764	68.1468	1.26547	118.867	36.2288	66.7097	0.763764	NA
101517AL3-43	57.0705	41380.1	1.17222	10.7903	1.41649	2.79592	1.82117	0.2189	1.14466	0.628527	1276.06	13.2517	1354.45	13.6212	1480.43	26.8541	1480.43	26.8541	86.1955
101517AL3-44	235.504	133974	1.96081	5.49995	0.515175	12.5743	1.05304	0.501801	0.918412	0.872156	2621.53	19.7823	2648.3	9.90498	2668.81	8.53223	2668.81	8.53223	98.2286
101517AL3-45	385.853	52098.6	1.71466	17.7222	0.940233	0.52787	1.66301	0.0678783	1.3717	0.824829	423.36	5.62063	430.395	5.83403	468.225	20.8234	423.36	5.62063	90.4182
101517AL3-46	386.433	61304.3	1.45805	16.8258	0.806798	0.749737	1.31853	0.0915317	1.04288	0.790941	564.589	5.63752	568.072	5.73668	582.058	17.5208	564.589	5.63752	96.9988
101517AL3-47	2918.1	45261.1	2.51104	20.8583	0.783304	0.0673816	1.46502	0.0101978	1.23803	0.84506	65.4064	0.805658	66.2117	0.939065	95.4298	18.559	65.4064	0.805658	NA
101517AL3-48	396.444	77527.5	1.30175	16.3725	0.743489	0.863234	1.40625	0.102549	1.19364	0.848808	629.33	7.15691	631.887	6.61548	641.065	15.989	629.33	7.15691	98.1694
101517AL3-49	190.516	72992.3	1.14199	10.3911	0.657456	3.35615	1.55077	0.253039	1.40451	0.905683	1454.13	18.2838	1494.23	12.1321	1551.56	12.3466	1551.56	12.3466	93.7205
101517AL3-50	447.472	212286	4.47051	9.72783	0.626342	4.23082	1.22348	0.298627	1.051	0.859025	1684.49	15.58	1680.02	10.0484	1674.42	11.5751	1674.42	11.5751	100.602
101517AL3-51	33.3808	15644.9	15.9001	9.41901	0.988718	4.3164	1.54686	0.294995	1.18962	0.769058	1666.44	17.4693	1696.5	12.7528	1733.82	18.1366	1733.82	18.1366	96.1138
101517AL3-53	136.856	33548.7	3.52871	12.415	0.889828	2.13853	1.19391	0.192642	0.796011	0.666724	1135.67	8.28853	1161.35	8.2604	1209.57	17.5283	1209.57	17.5283	93.8905
101517AL3-56	84.8517	14617.9	0.495519	12.925	0.851049	1.92566	1.39515	0.180592	1.10552	0.792399	1070.21	10.9014	1090.03	9.32438	1129.85	16.9506	1129.85	16.9506	94.7214
101517AL3-57	155.97	819320	0.611706	5.34036	0.494284	13.1702	0.89343	0.510328	0.744245	0.83302	2658.03	16.2111	2691.92	8.43173	2717.46	8.14896	2717.46	8.14896	97.8132
101517AL3-58	72.2397	9745.19	2.73473	16.0327	1.27354	0.87546	1.63422	0.101843	1.0241	0.626657	625.201	6.10198	638.528	7.74601	685.993	27.1759	625.201	6.10198	91.1382
101517AL3-59	280.194	291227	1.62971	2.77581	0.507509	38.921	1.02859	0.783901	0.894667	0.869801	3731.2	25.3438	3743.62	10.1828	3750.27	7.70836	3750.27	7.70836	99.4915
101517AL3-61	873.676	414237	4.32054	9.64549	0.625607	4.30435	1.48688	0.301245	1.34886	0.907176	1697.48	20.1302	1694.19	12.2519	1690.12	11.5401	1690.12	11.5401	100.436
101517AL3-62	57.0871	71431.2	2.36172	11.93	0.885517	2.42576	1.5479	0.209979	1.26958	0.820199	1228.71	14.203	1250.26	11.1296	1287.56	17.2207	1287.56	17.2207	95.4289
101517AL3-63	1928.93	429131	5.28976	18.1094	0.608347	0.489509	1.13343	0.0643209	0.956335	0.843753	401.849	3.7257	404.576	3.7822	420.151	13.5831	401.849	3.7257	95.6442
101517AL3-64	393.157	101539	8.50848	13.4412	0.565025	1.71463	1.11097	0.167223	0.956555	0.86101	996.792	8.83426	1014.02	7.12521	1051.43	11.4054	1051.43	11.4054	94.8039
101517AL3-65	736.715	2.41215e+06	1.23617	4.30845	0.546083	19.0059	1.13219	0.594153	0.991789	0.875992	3006.24	23.8291	3042.12	10.9218	3065.89	8.73117	3065.89	8.73117	98.0543
101517AL3-66	513.781	98242.7	2.17988	19.4357	1.16671	0.17285	1.57614	0.0243757	1.05972	0.672353	155.251	1.62558	161.889	2.35859	260.137	26.8	155.251	1.62558	NA
101517AL3-67	620.369	106285	2.16041	18.0056	0.681815	0.501646	1.01945	0.0655378	0.757894	0.743435	409.216	3.00503	412.816	3.45801	432.971	15.1893	409.216	3.00503	94.5134
101517AL3-69	314.78	117212	2.05721	5.2564	0.686975	11.4885	1.16908	0.438167	0.945951	0.809138	2342.43	18.5788	2563.65	10.9206	2743.54	11.2953	2743.54	11.2953	85.3797
101517AL3-70	595.864	500475	1.90066	8.3714	0.655309	5.32318	1.61981	0.323338	1.48133	0.914512	1806.01	23.3324	1872.59	13.847	1947.28	11.7142	1947.28	11.7142	92.7453
101517AL3-71	336.6	332866	5.38906	4.60619	0.568212	17.8742	1.22856	0.597387	1.08926	0.886618	3019.3	26.2603	2982.99	11.8142	2958.59	9.16785	2958.59	9.16785	102.052
101517AL3-73	407.036	97295.8	1.83603	12.4163	0.504407	2.37922	1.11775	0.214345	0.997467	0.892388	1251.93	11.3498	1236.38	7.99102	1209.39	9.93103	1209.39	9.93103	103.518
101517AL3-74	2864.97	257224	0.141382	20.4297	0.920753	0.0744284	1.39651	0.0110329	1.04998	0.751858	70.733	0.73862	72.8931	0.982279	144.311	21.6023	70.733	0.73862	NA
101517AL3-75	169.05	67365.4	0.683125	7.07768	0.755988	7.84077	1.46802	0.402659	1.2584	0.857208	2181.27	23.2875	2212.9	13.2207	2242.3	13.072	2242.3	13.072	97.2782
101517AL3-76	248.516	538155	2.04443	8.15514	0.705597	6.22081	1.19343	0.3681	0.962498	0.806499	2020.45	16.6943	2007.38	10.44	1993.94	12.5424	1993.94	12.5424	101.33
101517AL3-77	712.538	41326.1	1.14167	20.4711	1.43365	0.0693899	1.75608	0.0103068	1.01414	0.5775	66.1019	0.666939	68.1203	1.157	139.612	33.6667	66.1019	0.666939	NA
101517AL3-78	224.553	608007	2.35541	5.49277	0.532557	12.8527	1.05155	0.512239	0.906717	0.862269	2666.18	19.799	2668.91	9.90679	2670.97	8.81829	2670.97	8.81829	99.8207
101517AL3-79	447.14	16959.4	2.29541	20.0372	2.07956	0.0726039	2.43892	0.0105556	1.27427	0.522473	67.6893	0.858031	71.1674	1.67629	189.687	48.3835	67.6893	0.858031	NA
101517AL3-80	108.856	12769	1.6167	15.7004	1.25052	0.87643	1.589	0.0998428	0.980379	0.616977	613.488	5.73718	639.052	7.53612	730.532	26.4776	613.488	5.73718	83.9782
101517AL3-81	397.469	766920	14.105	13.0792	0.69602	1.90823	1.23363	0.181092	1.01852	0.825634	1072.94	10.0671	1083.97	8.21911	1106.18	13.9055	1106.18	13.9055	96.9948
101517AL3-82	1545.89	118649	2.96859	14.633	2.64928	0.147716	2.98683	0.0156837	1.3793	0.461793	100.319	1.37299	139.894	3.90334	877.927	54.8481	100.319	1.37299	NA
101517AL3-83	558.524	38420.7	3.49053	18.0664	0.71336	0.54122	1.24363	0.070947	1.01869	0.819128	441.859	4.35039	439.228	4.43439	425.446	15.9122	441.859	4.35039	103.858
101517AL3-84	234.928	166980	1.26042	10.5713	0.800519	3.28726	1.54432	0.252144	1.32064	0.85516	1449.52	17.1435	1478.04	12.0238	1519.21	15.0961	1519.21	15.0961	95.4133
101517AL3-85	287.66	694121	1.81644	9.4617	0.717694	4.42916	1.44116	0.304074	1.24974	0.867178	1711.48	18.7852	1717.81	11.9385	1725.52	13.1799	1725.52	13.1799	99.1861
101517AL3-86	362.035	587586	2.98118	8.05813	0.573381	6.24222	1.18328	0.364973	1.03508	0.874754	2005.7	17.8415	2010.39	10.3562	2015.18	10.1689	2015.18	10.1689	99.5297
101517AL3-87	287.253	111993	1.23717	9.41016	0.577511	4.53694	1.26184	0.309776	1.12192	0.88912	1739.6	17.1054	1737.77	10.4989	1735.54	10.5904	1735.54	10.5904	100.234
101517AL3-88	247.936	162265	2.25812	13.4981	1.98541	0.112298	2.31609	0.0109985	1.19265	0.51494	70.5139	0.836401	108.066	2.37432	1042.91	40.0734	70.5139	0.836401	NA
101517AL3-90	852.456	84018.1	0.706469	19.285	1.04232	0.173457	1.54802	0.0242718	1.14452	0.739347	154.597	1.74835	162.415	2.32345	277.988	23.883	154.597	1.74835	NA
101517AL3-91	183.892	126800	2.02486	9.46196	0.601558	4.39269	1.21923	0.301578	1.0605	0.869808	1699.13	15.8401	1710.97	10.0845	1725.47	11.0472	1725.47	11.0472	98.4733
101517AL3-92	230.487	81726.6	2.52127	9.40165	0.670026	4.00738	1.96853	0.273371	1.85099	0.940292	1557.89	25.6166	1635.69	15.9977	1737.21	12.2847	1737.21	12.2847	89.678
101517AL3-93	47.6031	10767.2	1.83633	12.8798	0.934852	1.85766	1.29365	0.173606	0.894186	0.691215	1031.95	8.52685	1066.16	8.53908	1136.83	18.5819	1136.83	18.5819	90.7745
101517AL3-94	899.976	140681	3.50603	10.8813	0.607004	3.37876	1.33455	0.266762	1.18852	0.890574	1524.35	16.1344	1499.48	10.4565	1464.5	11.5319	1464.5	11.5319	104.086
101517AL3-96	115.677	217943	1.01597	12.8422	0.738664	1.86339	1.22742	0.173633	0.98027	0.798644	1032.1	9.34899	1068.19	8.11063	1142.66	14.685	1142.66	14.685	90.3242
101517AL3-98	970.011	361916	3.84033	9.115	0.736758	5.07077	1.08172	0.335366	0.792026	0.732192	1864.34	12.8226	1831.23	9.17459	1793.78	13.4158	1793.78	13.4158	103.934
101517AL3-99	2044.05	115934	2.65498	18.6418	0.687224	0.366748	1.15839	0.0496071	0.932515	0.805011	312.109	2.84113	317.24	3.1562	355.123	15.4993	312.109	2.84113	NA
101517AL3-101	1037.39	78935.3	1.84743	17.9729	0.577679	0.532628	1.31461	0.0694593	1.18089	0.898277	432.898	4.94417	433.552	4.63893	437.01	12.86	432.898	4.94417	99.059
101517AL3-102	685.47	332614	1.84486	17.8968	0.558535	0.524224	1.15232	0.0680736	1.0079	0.874677	424.539	4.1411	427.969	4.02413	446.459	12.413	424.539	4.1411	95.0904
101517AL3-103	3507.7	63160.8	6.4816	20.3141	0.911826	0.0684237	1.56227	0.0100854	1.26857	0.812003	64.6887	0.816518	67.2025	1.0159	157.658	21.3407	64.6887	0.816518	NA
101517AL3-104	73.2432	15625.8	0.689065	13.6697	0.971108	1.57414	1.28564	0.156131	0.842502	0.655319	935.239	7.33451	960.06	7.98304	1017.34	19.6703	1017.34	19.6703	91.9299
101517AL3-105	254.621	122681	2.28143	9.06492	0.65694	4.76573	1.21069	0.313459	1.01696	0.839981	1757.71	15.6454	1778.88	10.1614	1803.8	11.9476	1803.8	11.9476	97.4446
101517AL3-106	626.041	213934	3.55598	14.1345	0.766696	1.47591	2.03795	0.151365	1.88823	0.926535	908.612	16.0025	920.554	12.3359	949.3	15.6859	949.3	15.6859	95.7139
101517AL3-107	1456.32	15998.8	4.31664	11.9137	1.45269	0.205066	1.98639	0.0177267	1.35477	0.68203	113.273	1.52119	189.404	3.43224	1290.23	28.2641	113.273	1.52119	NA
101517AL3-108	251.218	95902.5	2.14696	16.9934	0.81738	0.672012	1.36109	0.08286	1.08833	0.7996	513.171	5.36847	521.935	5.55468	560.462	17.798	513.171	5.36847	91.5622
101517AL3-109	566.884	100690	5.12462	16.4942	1.60633	0.0890315	1.89265	0.0106552	1.00091	0.528843	68.3245	0.680257	86.6008	1.5711	625.085	34.6269	68.3245	0.680257	NA
101517AL3-110	509.26	128514	2.53297	12.7811	0.699514	2.04662	1.36295	0.189798	1.16975	0.858248	1120.28	12.029	1131.17	9.29696	1152.11	13.8738	1152.11	13.8738	97.2376
101517AL3-111	652.951	1.58896e+06	1.01016	18.6622	0.851157	0.192649	1.54574	0.0260866	1.29029	0.834739	166.009	2.11465	178.887	2.53526	352.647	19.2205	166.009	2.11465	NA
101517AL3-112	527.484	91686.7	1.60289	10.2228	0.700936	3.65114	1.74078	0.270824	1.59342	0.915351	1544.98	21.8903	1560.76	13.8761	1582.15	13.1089	1582.15	13.1089	97.651
101517AL3-113	753.368	593801	6.33676	9.11926	0.535495	5.01086	1.0373	0.331558	0.888395	0.856446	1845.93	14.2602	1821.16	8.78057	1792.93	9.75193	1792.93	9.75193	102.956
101517AL3-114	660.286	67556.1	1.84324	9.68305	0.90039	3.9963	1.5037	0.280775	1.20433	0.800911	1595.26	17.0196	1633.44	12.213	1682.94	16.6242	1682.94	16.6242	94.7899
101517AL3-115	211.831	446120	2.18487	5.76144	0.676529	11.7409	1.2892	0.490817	1.09743	0.851247	2574.21	23.2912	2583.96	12.0635	2591.61	11.2845	2591.61	11.2845	99.3286
101517AL3-116	525.355	354915	1.95559	7.686	0.884058	7.23699	1.50559	0.403596	1.2187	0.809453	2185.57	22.5903	2141.07	13.4323	2098.62	15.5282	2098.62	15.5282	104.143
101517AL3-117	377.446	90332.1	3.50756	10.0057	0.759339	3.2359	1.38554	0.234925	1.15893	0.836448	1360.26	14.2124	1465.8	10.7477	1622.2	14.1276	1622.2	14.1276	83.8531
101517AL3-118	349.794	456469	2.2559	6.59302	0.542023	9.15326	1.11745	0.437873	0.977194	0.874485	2341.11	19.1835	2353.45	10.2292	2364.15	9.25212	2364.15	9.25212	99.0257
101517AL3-120	423.707	142451	0.783064	13.3484	0.661426	1.82712	1.35105	0.176964	1.17808	0.871968	1050.36	11.4186	1055.25	8.86618	1065.38	13.2997	1065.38	13.2997	98.5909
101517AL3-121	236.436	4561.79	1.65924	18.8989	2.35846	0.131022	2.58769	0.0179668	1.06481	0.411489	114.793	1.21151	125.016	3.04382	324.076	53.5636	114.793	1.21151	NA
101517AL3-122	1747.77	30459	1.6575	18.5974	2.21941	0.0825174	2.48915	0.0111349	1.12698	0.452756	71.3835	0.800038	80.509	1.9266	360.461	50.0683	71.3835	0.800038	NA
101517AL3-123	561.379	6.94412e+06	1.31241	9.09189	0.543846	4.96809	1.29702	0.327742	1.1775	0.907846	1827.43	18.7369	1813.91	10.9635	1798.4	9.89732	1798.4	9.89732	101.614
101517AL3-124	53.1049	51693.1	3.18927	8.88289	0.79808	4.87026	1.24223	0.313902	0.951945	0.766321	1759.88	14.6609	1797.12	10.4651	1840.61	14.4476	1840.61	14.4476	95.6139
101517AL3-125	491.685	131599	1.70731	10.7886	0.672737	3.1656	1.38464	0.247804	1.21022	0.874038	1427.14	15.4934	1448.81	10.6846	1480.73	12.7529	1480.73	12.7529	96.3807
101517AL3-126	246.445	99269.9	2.58337	8.90119	0.723835	5.05353	1.24053	0.326385	1.00747	0.812123	1820.84	15.9812	1828.34	10.5158	1836.88	13.1112	1836.88	13.1112	99.1265
101517AL3-128	700.459	399253	1.82002	10.4449	0.654158	3.67024	1.23753	0.278155	1.0505	0.848871	1582.06	14.7374	1564.92	9.87539	1541.85	12.3004	1541.85	12.3004	102.608
101517AL3-129	87.6551	3.30832e+06	2.32446	5.25763	0.603231	14.5962	0.98829	0.556823	0.782835	0.79211	2853.49	18.0496	2789.28	9.39178	2743.16	9.91834	2743.16	9.91834	104.022
101517AL3-130	740.174	5278.34	2.08725	17.418	1.93613	0.0330364	2.27232	0.00417522	1.18947	0.523462	26.8592	0.318818	33.0024	0.737864	506.408	42.5994	26.8592	0.318818	NA
101517AL3-131	1712.72	15645.5	5.67595	20.7673	0.860661	0.0725735	1.51649	0.0109357	1.2486	0.823349	70.1132	0.870688	71.1387	1.04189	105.727	20.3368	70.1132	0.870688	NA
101517AL3-132	2699.39	64105.5	2.59905	20.5682	0.769687	0.0761466	1.2398	0.0113641	0.971948	0.783956	72.8446	0.704027	74.5156	0.890759	128.481	18.1328	72.8446	0.704027	NA
101517AL3-133	521.699	320271	1.3451	9.74829	0.5976	4.18991	1.30062	0.296361	1.15519	0.888191	1673.24	17.0243	1672.05	10.662	1670.54	11.0493	1670.54	11.0493	100.162
101517AL3-134	485.7	469907	2.13755	9.11118	0.672738	5.04911	1.36827	0.333793	1.19146	0.87078	1856.74	19.2215	1827.6	11.5969	1794.54	12.2489	1794.54	12.2489	103.466
101517AL3-135	3480.09	91062.6	4.55781	20.9945	0.735923	0.0705143	1.35237	0.0107416	1.1346	0.838973	68.8758	0.777306	69.1873	0.904503	79.9474	17.4526	68.8758	0.777306	NA
101517AL3-136	1126.34	23944.9	2.81828	17.9975	1.44913	0.0861097	1.64005	0.0112448	0.767965	0.468257	72.0843	0.550498	83.8729	1.32028	433.964	32.3002	72.0843	0.550498	NA
101517AL3-137	539.24	70250.9	1.38927	10.2088	0.75426	3.53853	1.38154	0.262111	1.15747	0.837814	1500.63	15.4959	1535.87	10.9375	1584.72	14.1016	1584.72	14.1016	94.6939
101517AL3-138	529.977	540343	1.89798	5.66852	0.680967	10.3382	3.38253	0.42521	3.31328	0.979526	2284.09	63.7257	2465.53	31.3264	2618.7	11.3321	2618.7	11.3321	87.2222
101517AL3-139	847.426	80802.4	0.581426	13.7888	0.785876	1.34689	1.54514	0.134755	1.33036	0.860996	814.935	10.1843	866.214	9.00426	999.746	15.9481	999.746	15.9481	81.5143
101517AL3-140	359.064	98231	7.01851	9.76724	0.591677	4.21968	1.15019	0.299047	0.986333	0.85754	1686.58	14.6372	1677.86	9.44164	1666.94	10.9448	1666.94	10.9448	101.178
101517AL3-142	1917.71	61562.4	2.4543	20.6044	0.930068	0.0706123	1.38323	0.0105567	1.02386	0.740198	67.6961	0.689488	69.2803	0.926344	124.301	21.9157	67.6961	0.689488	NA
101517AL3-143	177.029	29021.2	1.006	16.1261	0.893589	0.876988	1.56214	0.102615	1.28132	0.820234	629.715	7.68711	639.354	7.41122	673.585	19.1116	629.715	7.68711	93.4872
101517AL3-144	183.883	1.24903e+06	1.18786	3.22814	0.367244	30.2519	1.18594	0.708588	1.12765	0.950846	3453.13	30.1476	3495.03	11.6571	3519.13	5.66908	3519.13	5.66908	98.1247
101517AL3-145	549.301	683256	1.18859	9.81641	0.715564	3.44926	2.03922	0.245678	1.90955	0.936413	1416.15	24.278	1515.7	16.0535	1657.65	13.2525	1657.65	13.2525	85.431
101517AL3-146	1150.45	277747	0.822114	6.39374	0.878065	7.87878	1.63131	0.365512	1.37484	0.842781	2008.25	23.7235	2217.26	14.6995	2416.39	14.9052	2416.39	14.9052	83.1094
101517AL3-148	559.084	57297.8	2.02338	11.9661	0.75038	2.16671	1.68349	0.188122	1.50701	0.895168	1111.19	15.382	1170.42	11.6964	1281.69	14.6073	1281.69	14.6073	86.6976
101517AL3-149	160.529	316659	1.11661	13.7201	0.728606	1.48138	1.55242	0.147473	1.37082	0.88302	886.781	11.3571	922.793	9.41077	1009.87	14.7742	1009.87	14.7742	87.8115
101517AL3-151	254.717	218506	3.23286	12.63	0.598314	2.27289	1.05992	0.208291	0.8749	0.82544	1219.7	9.72244	1203.91	7.47408	1175.71	11.8362	1175.71	11.8362	103.742
101517AL3-152	835.785	585368	0.999891	10.0589	0.565108	4.01268	1.34776	0.292869	1.22356	0.907851	1655.85	17.8675	1636.77	10.9553	1612.33	10.5268	1612.33	10.5268	102.699
101517AL3-153	734.763	385685	2.55564	10.0477	0.575705	3.24655	1.52558	0.236688	1.41278	0.926063	1369.46	17.4305	1468.35	11.8432	1614.4	10.7214	1614.4	10.7214	84.8278
101517AL3-154	634.957	807767	3.19359	12.7445	0.639809	2.16852	1.29177	0.200527	1.1222	0.868725	1178.15	12.0834	1171.01	8.97708	1157.8	12.7025	1157.8	12.7025	101.758
101517AL3-155	114.209	64340.3	1.40393	12.4998	0.811698	2.10873	1.38407	0.191256	1.12107	0.809981	1128.17	11.6028	1151.66	9.53323	1196.14	15.9927	1196.14	15.9927	94.3177
101517AL3-156	399.31	154424	1.8385	10.7596	0.652273	3.35005	1.2239	0.261539	1.0356	0.846148	1497.71	13.8403	1492.8	9.57072	1485.82	12.3565	1485.82	12.3565	100.8
101517AL3-157	547.65	266712	3.02382	9.60703	0.548942	4.45204	1.21933	0.310339	1.08877	0.892927	1742.37	16.6229	1722.08	10.1103	1697.48	10.1148	1697.48	10.1148	102.645
101517AL3-158	355.895	123185	1.27447	10.1543	0.626582	3.31735	2.39937	0.244417	2.31611	0.9653	1409.62	29.3255	1485.14	18.7219	1594.71	11.7006	1594.71	11.7006	88.3931
101517AL3-159	1104.01	51073.7	2.3466	9.72001	0.816793	3.36522	2.60918	0.237338	2.47804	0.949738	1372.84	30.6414	1496.34	20.4268	1675.91	15.0925	1675.91	15.0925	81.9164
101517AL3-160	705.894	493342	1.81645	10.2299	0.552749	3.92073	1.12522	0.291023	0.9801	0.871027	1646.64	14.2424	1617.97	9.1037	1580.85	10.3389	1580.85	10.3389	104.161
101517AL3-161	328.198	426034	0.914631	8.04486	0.659411	6.03223	1.24304	0.352114	1.05372	0.847695	1944.69	17.6894	1980.51	10.8272	2018.1	11.6907	2018.1	11.6907	96.362
101517AL3-162	671.48	153215	2.49525	14.0592	0.590052	1.51949	1.00019	0.155004	0.807604	0.807448	928.955	6.98678	938.269	6.12496	960.225	12.0568	960.225	12.0568	96.7434
101517AL3-163	2290.48	540536	26.7193	9.80125	0.54041	3.51315	0.917505	0.249842	0.741466	0.808134	1437.66	9.55478	1530.18	7.25208	1660.51	10.0045	1660.51	10.0045	86.5793
101517AL3-164	342.308	145848	1.5342	11.204	0.549146	3.01552	1.13748	0.245144	0.99614	0.875744	1413.38	12.6427	1411.55	8.67369	1408.77	10.5116	1408.77	10.5116	100.328
101517AL3-165	224.128	147722	2.95555	10.7729	0.735462	3.02925	1.81368	0.236785	1.65787	0.914091	1369.96	20.4612	1415.02	13.8461	1483.49	13.9368	1483.49	13.9368	92.3476
101517AL3-166	520.973	500037	3.22609	12.5524	0.6009	2.172	1.4864	0.197822	1.35953	0.914642	1163.61	14.474	1172.12	10.3349	1187.87	11.8663	1187.87	11.8663	97.9577
101517AL3-168	340.861	874320	1.14724	8.41154	0.579733	5.4977	1.15953	0.33554	1.0042	0.866041	1865.18	16.264	1900.24	9.962	1938.73	10.3737	1938.73	10.3737	96.2063
101517AL3-170	575.493	97193.6	4.81396	9.71275	0.559611	4.27322	1.35361	0.301152	1.23252	0.91054	1697.02	18.3895	1688.22	11.1383	1677.29	10.3396	1677.29	10.3396	101.176
101517AL3-172	454.313	293888	1.87571	5.19037	0.49144	13.5447	0.991595	0.510099	0.861248	0.868548	2657.05	18.7541	2718.41	9.37651	2764.32	8.0671	2764.32	8.0671	96.1196
101517AL3-174	344.277	822718	1.72512	12.7631	0.72105	1.84996	1.61817	0.171319	1.44864	0.895234	1019.37	13.6587	1063.42	10.6658	1154.91	14.3183	1154.91	14.3183	88.2646
101517AL3-175	231.752	116590	1.06643	8.89648	0.443434	5.11935	0.910171	0.330461	0.794844	0.873291	1840.62	12.7268	1839.32	7.73163	1837.84	8.03113	1837.84	8.03113	100.151
101517AL3-176	424.428	1.13071e+06	1.53242	5.46155	0.479388	13.4242	0.989641	0.531975	0.865781	0.874843	2749.77	19.3806	2709.96	9.35226	2680.4	7.92744	2680.4	7.92744	102.588
101517AL3-179	374.226	972077	20.3035	13.9515	0.485975	1.62041	1.04046	0.164033	0.91999	0.884216	979.152	8.35735	978.149	6.53305	975.893	9.90589	975.893	9.90589	100.334
101517AL3-180	107.486	19706.1	2.52931	9.67059	0.829082	3.42597	3.00615	0.240394	2.88956	0.961216	1388.75	36.1009	1510.37	23.6316	1685.32	15.3029	1685.32	15.3029	82.4025
101517AL3-181	1104.71	190580	1.23206	17.8084	0.47224	0.545924	1.21035	0.0705415	1.11442	0.920743	439.417	4.73378	442.323	4.33997	457.446	10.4845	439.417	4.73378	96.0589
101517AL3-182	1280.94	15523	2.90419	15.264	0.968128	0.482736	1.9433	0.0534644	1.68498	0.867069	335.756	5.5126	399.948	6.42423	789.946	20.3382	335.756	5.5126	NA
101517AL3-183	49.8439	650.64	0.308492	5.92741	2.4863	0.26659	2.8964	0.0114656	1.48574	0.512962	73.4914	1.08569	239.963	6.19015	2544.12	41.6764	73.4914	1.08569	NA
101517AL3-184	1167.67	151289	0.789071	18.8592	0.694342	0.314743	1.09187	0.0430693	0.842653	0.771754	271.83	2.24296	277.851	2.65409	328.845	15.7449	271.83	2.24296	NA
101517AL3-185	409.153	144332	8.79778	13.2908	0.542979	1.83499	1.35912	0.176959	1.24594	0.916729	1050.34	12.0761	1058.07	8.93265	1074.07	10.886	1074.07	10.886	97.7907
101517AL3-186	223.261	86735.7	1.08173	9.83587	0.572737	3.98815	1.00313	0.284625	0.823551	0.820984	1614.61	11.7627	1631.79	8.1438	1653.98	10.6119	1653.98	10.6119	97.6196
101517AL3-187	329.799	10061	0.979224	20.7547	2.86611	0.0280014	3.19547	0.0042168	1.41297	0.442177	27.1261	0.382478	28.0414	0.883795	107.205	67.6962	27.1261	0.382478	NA
101517AL3-188	1053.23	296701	1.31345	8.56804	0.697483	5.15882	1.21625	0.320716	0.996387	0.819227	1793.22	15.5976	1845.85	10.3448	1905.68	12.5297	1905.68	12.5297	94.0988
101517AL3-189	381.515	358226	2.31368	13.2481	0.539958	1.83616	1.1434	0.176502	1.00788	0.881471	1047.84	9.74728	1058.49	7.51652	1080.52	10.8341	1080.52	10.8341	96.9756
101517AL3-191	335.846	84832.5	1.31166	13.3298	0.678959	1.88526	1.09995	0.18234	0.865396	0.786757	1079.75	8.60346	1075.91	7.29789	1068.18	13.6295	1068.18	13.6295	101.083
101517AL3-192	118.097	106612	0.765692	10.5063	0.639054	3.35325	1.33586	0.255626	1.17309	0.878151	1467.42	15.3955	1493.55	10.4486	1530.82	12.0323	1530.82	12.0323	95.8589
101517AL3-193	39.8591	41127	2.87424	13.3009	1.09228	1.77107	1.55673	0.170925	1.10921	0.712524	1017.21	10.4378	1034.91	10.1029	1072.53	21.9221	1072.53	21.9221	94.8416
101517AL3-194	115.821	106323	0.955603	9.67736	0.657982	3.91241	1.38305	0.274719	1.21651	0.879583	1564.71	16.9009	1616.25	11.185	1684.03	12.1467	1684.03	12.1467	92.9148
101517AL3-195	172.046	1.41108e+06	5.98282	5.46092	0.7426	12.1878	1.34522	0.482924	1.12168	0.833826	2539.99	23.5477	2618.97	12.6241	2680.59	12.2819	2680.59	12.2819	94.7547
101517AL3-197	113.573	34501.3	1.94695	17.0968	1.34162	0.611688	1.78461	0.0758809	1.17682	0.659427	471.489	5.35054	484.624	6.87749	547.254	29.3193	471.489	5.35054	86.1554
101517AL3-198	2150.29	172522	2.04983	19.9514	0.650957	0.172239	1.04966	0.024934	0.823436	0.784477	158.764	1.29135	161.36	1.56601	199.655	15.124	158.764	1.29135	NA
101517AL3-199	467.396	3.37613e+06	1.73375	8.25034	0.744483	5.73297	1.47169	0.343194	1.26949	0.86261	1902.02	20.9098	1936.35	12.7245	1973.28	13.2658	1973.28	13.2658	96.3887
101517AL3-200	90.5855	115458	1.52083	5.2951	0.851025	12.3398	1.54564	0.4741	1.29026	0.834771	2501.52	26.751	2630.61	14.5187	2731.48	14.009	2731.48	14.009	91.581
101517AL3-201	489.351	151833	3.12524	9.42052	0.520661	4.64141	1.27663	0.317258	1.16563	0.913053	1776.33	18.0976	1756.75	10.6653	1733.53	9.55009	1733.53	9.55009	102.469
101517AL3-202	290.341	99283.2	1.47973	10.8908	0.637755	3.14231	1.18153	0.248311	0.994623	0.841812	1429.76	12.7541	1443.12	9.10106	1462.84	12.1188	1462.84	12.1188	97.7383
101517AL3-203	214.923	2374.86	3.0807	12.0269	2.10918	0.123202	2.36312	0.0107512	1.0657	0.450969	68.937	0.730744	117.971	2.63195	1271.81	41.1393	68.937	0.730744	NA
101517AL3-207	231.424	175766	2.5154	12.9834	0.648831	2.04058	1.51318	0.192234	1.36702	0.903406	1133.47	14.209	1129.15	10.3118	1120.87	12.9588	1120.87	12.9588	101.124
101517AL3-208	43.364	29488.1	1.2512	13.0691	1.20999	1.81741	1.70157	0.17234	1.19636	0.703092	1024.99	11.3374	1051.75	11.1455	1107.73	24.1615	1107.73	24.1615	92.531
101517AL3-209	695.884	20868.3	1.90734	16.7001	1.02859	0.441607	3.9408	0.0535111	3.8042	0.965336	336.042	12.4562	371.385	12.2582	598.276	22.2557	336.042	12.4562	NA
101517AL3-210	112.131	70648.8	1.23136	9.20106	0.685974	4.72993	1.40328	0.315776	1.22419	0.872376	1769.07	18.9394	1772.56	11.7625	1776.65	12.5156	1776.65	12.5156	99.5732
101517AL3-211	635.415	230479	2.66458	10.8573	1.66884	0.516172	2.35432	0.0406635	1.66066	0.705368	256.945	4.18306	422.591	8.13861	1468.68	31.6887	256.945	4.18306	NA
101517AL3-212	437.23	592599	1.31759	9.01009	0.681781	4.15003	1.56567	0.271311	1.40943	0.900209	1547.45	19.39	1664.22	12.8113	1814.83	12.3808	1814.83	12.3808	85.2672
101517AL3-213	459.735	1.07113e+06	3.35567	9.9403	0.64405	4.1029	1.27915	0.295922	1.10518	0.863996	1671.06	16.2686	1654.88	10.4434	1634.39	11.9652	1634.39	11.9652	102.244
101517AL3-216	918.789	1.93845e+06	1.18681	14.3171	0.573285	1.35717	1.34564	0.140987	1.21741	0.904709	850.239	9.69736	870.654	7.86704	922.971	11.7856	850.239	9.69736	92.1197
101517AL3-218	1034.2	411369	1.77057	4.98415	0.605784	12.1876	1.37058	0.440754	1.22944	0.89702	2354.02	24.2456	2618.95	12.8621	2830.66	9.88087	2830.66	9.88087	83.1614
101517AL3-219	233.928	307821	2.23247	14.1729	0.583148	1.51027	1.09191	0.155311	0.923147	0.845444	930.666	8.00005	934.549	6.67047	943.709	11.9289	943.709	11.9289	98.618
101517AL3-221	926.336	477227	9.77804	5.21314	0.555425	12.707	1.39685	0.480651	1.28167	0.917547	2530.1	26.821	2658.18	13.1493	2757.13	9.12357	2757.13	9.12357	91.7659
101517AL3-222	894.205	1.91462e+06	5.89661	8.62915	0.563604	4.53925	1.30567	0.284211	1.17776	0.902036	1612.53	16.8027	1738.19	10.8645	1892.9	10.1381	1892.9	10.1381	85.1883
101517AL3-223	192.793	30643.7	5.61575	13.5138	0.786645	1.65963	1.16362	0.162733	0.857443	0.736873	971.948	7.73606	993.234	7.37292	1040.53	15.897	1040.53	15.897	93.4093
101517AL3-224	646.99	273093	1.20911	5.90855	0.55269	11.2599	1.27544	0.48273	1.14947	0.901234	2539.14	24.1246	2544.89	11.8948	2549.46	9.25632	2549.46	9.25632	99.5953
101517AL3-225	33.2864	608.882	0.948424	4.5127	3.69733	0.398622	4.15577	0.0130523	1.89741	0.456572	83.5959	1.57591	340.648	12.0271	2991.61	59.4963	83.5959	1.57591	NA
101517AL3-226	279.624	2.62102e+06	2.61778	10.7314	0.663682	3.25675	1.26846	0.253588	1.08097	0.852197	1456.95	14.0964	1470.79	9.85428	1490.8	12.5643	1490.8	12.5643	97.7296
101517AL3-227	578.455	77206.6	1.50572	20.1245	1.39578	0.0759574	1.75154	0.0110913	1.05815	0.604129	71.1055	0.74827	74.3371	1.25552	179.517	32.5138	71.1055	0.74827	NA
101517AL3-229	6165.17	24391.6	2.71706	20.9636	0.847559	0.022685	1.26537	0.00345058	0.939574	0.74253	22.2055	0.208279	22.7766	0.284999	83.4511	20.1025	22.2055	0.208279	NA
101517AL3-231	592.674	52025.7	2.04074	19.553	1.02944	0.186459	1.4879	0.0264536	1.0743	0.722019	168.314	1.78479	173.604	2.37431	246.259	23.7013	168.314	1.78479	NA
101517AL3-232	1181.11	295164	4.15136	9.24184	0.547195	4.71103	1.12213	0.315909	0.979672	0.873045	1769.72	15.1613	1769.2	9.39913	1768.58	9.99495	1768.58	9.99495	100.065
101517AL3-233	499.313	1.14769e+06	3.81558	12.9597	0.588277	1.69087	1.44302	0.158999	1.31767	0.91313	951.213	11.653	1005.09	9.20732	1124.49	11.744	1124.49	11.744	84.5902
101517AL3-234	262.643	134927	1.97062	13.145	0.649613	1.9169	1.34311	0.18283	1.17556	0.875253	1082.42	11.7135	1086.99	8.96249	1096.17	12.987	1096.17	12.987	98.745
101517AL3-235	765.825	7.97538e+06	6.33431	13.1732	0.605797	1.97642	1.11396	0.188912	0.934836	0.8392	1115.48	9.57555	1107.5	7.51092	1091.89	12.1284	1091.89	12.1284	102.16
101517AL3-236	1449.23	150754	15.1907	18.1047	0.587043	0.461154	1.39011	0.0605793	1.26008	0.906456	379.148	4.63977	385.06	4.45484	420.728	13.1063	379.148	4.63977	NA
101517AL3-237	702.673	433709	1.35005	8.69709	0.661114	5.54061	1.31264	0.349639	1.134	0.863907	1932.87	18.938	1906.92	11.291	1878.79	11.9126	1878.79	11.9126	102.879
101517AL3-238	903.173	126033	19.2442	15.2162	0.61193	1.05191	1.23437	0.116137	1.07201	0.868469	708.293	7.19071	729.826	6.4254	796.515	12.8482	708.293	7.19071	88.9239
101517AL3-239	163.47	113192	0.958174	9.8642	0.688961	3.95703	1.06862	0.283217	0.816872	0.764418	1607.54	11.6223	1625.43	8.66186	1648.65	12.7761	1648.65	12.7761	97.5065
101517AL3-240	697.524	301167	3.25835	14.0127	1.79398	1.2922	4.14691	0.131383	3.73878	0.901583	795.752	27.9886	842.273	23.7417	966.945	36.6004	795.752	27.9886	82.2955
101517AL3-241	1337.32	61789.2	3.7065	10.2953	0.968981	0.717277	1.84135	0.0535811	1.56577	0.850339	336.47	5.13322	549.058	7.80946	1568.94	18.154	336.47	5.13322	NA
101517AL3-242	1022.38	20846.4	2.22956	20.4626	0.784046	0.0739957	1.17153	0.0109864	0.870486	0.743036	70.4367	0.609804	72.4842	0.81957	140.581	18.3956	70.4367	0.609804	NA
101517AL3-243	1481.19	388066	1.61761	19.7472	0.985447	0.112985	1.34695	0.0161887	0.918245	0.681721	103.523	0.943005	108.692	1.38839	223.457	22.7679	103.523	0.943005	NA
101517AL3-244	1862.61	28546	1.87409	19.4687	1.59484	0.0734588	1.95785	0.0103769	1.13564	0.580043	66.5493	0.751871	71.9764	1.3604	256.219	36.6739	66.5493	0.751871	NA
101517AL3-245	1199.66	95090.7	2.08259	17.3433	0.629751	0.692178	1.11221	0.0871037	0.91675	0.824258	538.385	4.73516	534.108	4.61947	515.86	13.833	538.385	4.73516	104.366
101517AL3-246	507.178	202359	3.45665	10.7788	0.536261	3.42654	1.24423	0.267987	1.12273	0.902352	1530.58	15.2965	1510.5	9.77988	1482.45	10.1634	1482.45	10.1634	103.246
101517AL3-247	188.618	104599	1.72099	8.78185	0.697906	5.35017	1.30612	0.340912	1.10402	0.845271	1891.05	18.0942	1876.92	11.1741	1861.29	12.6023	1861.29	12.6023	101.599
101517AL3-248	1326	122894	0.851419	18.7963	0.76407	0.358924	1.35719	0.0489512	1.12167	0.82647	308.079	3.37437	311.411	3.63981	336.424	17.297	308.079	3.37437	NA
101517AL3-249	114.513	22676.6	1.70831	13.0339	0.990944	1.80373	1.51672	0.170582	1.14825	0.757059	1015.32	10.7866	1046.81	9.90797	1113.12	19.7665	1113.12	19.7665	91.2138
101517AL3-251	559.728	669614	1.3563	8.3624	0.627897	5.81331	1.41933	0.35273	1.27289	0.896824	1947.62	21.3965	1948.4	12.2971	1949.21	11.2216	1949.21	11.2216	99.9187
101517AL3-252	1015.27	939879	0.798753	17.9588	0.574444	0.521196	1.07289	0.0679153	0.906144	0.844586	423.584	3.71489	425.95	3.73251	438.755	12.7842	423.584	3.71489	96.5421
101517AL3-253	175.412	264817	0.784154	5.69881	0.568719	11.5127	1.06156	0.476045	0.896358	0.844382	2510.02	18.6359	2565.61	9.91773	2609.82	9.47233	2609.82	9.47233	96.1757
101517AL3-254	708.453	7801.91	2.69631	19.7105	2.10576	0.0758561	2.36613	0.0108486	1.07905	0.45604	69.5583	0.746534	74.2415	1.69397	227.78	48.6815	69.5583	0.746534	NA
101517AL3-255	127.454	29135.7	2.02218	15.9324	1.0625	0.896603	1.51019	0.10365	1.0732	0.71064	635.762	6.49734	649.91	7.24923	699.344	22.6221	635.762	6.49734	90.9083
101517AL3-256	284.974	390237	2.80972	8.47991	0.592914	5.90995	1.0928	0.363632	0.917968	0.840014	1999.37	15.7802	1962.7	9.49057	1924.23	10.6257	1924.23	10.6257	103.905
101517AL3-257	1513.83	48392.5	3.76087	20.6196	0.821152	0.0714164	1.30534	0.0106848	1.0147	0.777345	68.5132	0.69152	70.0427	0.88347	122.565	19.3256	68.5132	0.69152	NA
101517AL3-258	157.304	150762	1.30108	9.89707	0.650754	3.78162	1.15281	0.271564	0.951576	0.825439	1548.73	13.1008	1588.85	9.25771	1642.48	12.0772	1642.48	12.0772	94.2924
101517AL3-259	152.965	114888	1.18093	5.48537	0.728926	12.9463	1.40876	0.515277	1.20552	0.85573	2679.12	26.4268	2675.75	13.2794	2673.2	12.0673	2673.2	12.0673	100.221
101517AL3-260	341.332	115970	0.771805	10.0983	0.554404	3.79684	1.20925	0.2782	1.07468	0.888711	1582.29	15.0784	1592.08	9.71914	1605.04	10.3388	1605.04	10.3388	98.5823
101517AL3-261	3362	17245.5	3.83679	20.6529	1.23311	0.0242216	1.62538	0.00362971	1.05892	0.651488	23.3563	0.246876	24.3011	0.390296	118.759	29.0744	23.3563	0.246876	NA
101517AL3-262	1820.08	49521.6	2.92749	20.3576	0.92965	0.0750904	1.48373	0.0110917	1.15637	0.77937	71.1083	0.817759	73.5186	1.05226	152.638	21.7577	71.1083	0.817759	NA
101517AL3-264	270.353	142572	1.26146	11.1864	0.575995	2.9323	1.01164	0.238006	0.831654	0.822084	1376.32	10.3069	1390.29	7.65996	1411.76	11.021	1411.76	11.021	97.4895
101517AL3-265	655.333	115722	4.58643	13.6468	0.572972	1.60386	1.43367	0.158813	1.3142	0.916666	950.176	11.6105	971.716	8.96684	1020.72	11.5997	1020.72	11.5997	93.0883
101517AL3-267	760.169	195636	12.5659	12.296	0.697857	2.19185	1.36312	0.195553	1.17094	0.859012	1151.38	12.3466	1178.46	9.50486	1228.52	13.6825	1228.52	13.6825	93.7209
101517AL3-268	432.599	117148	2.29219	8.795	0.585003	4.54485	1.0908	0.29003	0.920656	0.844022	1641.68	13.3432	1739.22	9.07852	1858.59	10.5667	1858.59	10.5667	88.3294
101517AL3-269	1286.74	112944	8.2282	10.2059	0.769738	0.76993	1.46836	0.0570148	1.25044	0.851586	357.446	4.34798	579.723	6.48582	1585.26	14.39	357.446	4.34798	NA
101517AL3-270	2978.24	179465	2.0315	20.6684	0.796842	0.0686644	1.16039	0.0102974	0.843534	0.726939	66.0417	0.55424	67.4313	0.757051	117.037	18.7903	66.0417	0.55424	NA
101517AL3-271	1653.87	66809.7	1.39643	20.1818	0.807563	0.165699	1.3957	0.0242643	1.13835	0.815607	154.55	1.7384	155.68	2.01446	172.881	18.8706	154.55	1.7384	NA
101517AL3-272	413.406	67592.8	1.37707	13.3761	0.682121	1.8094	1.44745	0.175611	1.27664	0.881995	1042.95	12.2935	1048.86	9.46599	1061.21	13.7256	1061.21	13.7256	98.2799
101517AL3-273	1005.5	463910	1.78635	9.12097	0.697907	4.85169	1.25606	0.321086	1.04432	0.831427	1795.03	16.3622	1793.91	10.5747	1792.59	12.7084	1792.59	12.7084	100.136
101517AL3-274	433.307	342611	1.35618	11.0127	0.423766	3.17459	1.0265	0.25367	0.934942	0.910809	1457.38	12.1952	1451	7.92629	1441.65	8.07551	1441.65	8.07551	101.091
101517AL3-275	1561.61	107711	4.37449	20.2405	0.887552	0.0735666	1.25982	0.0108041	0.894093	0.709698	69.2743	0.616061	72.0784	0.876578	166.1	20.7168	69.2743	0.616061	NA
101517AL3-276	290.348	71959.3	2.02894	13.2564	0.676747	1.83558	1.04106	0.176558	0.791085	0.759886	1048.14	7.65271	1058.28	6.84295	1079.25	13.58	1079.25	13.58	97.1174
101517AL3-277	185.873	89713.7	1.25765	8.03454	0.501678	6.2136	1.00959	0.362237	0.876123	0.8678	1992.77	15.0184	2006.37	8.83034	2020.38	8.89186	2020.38	8.89186	98.6334
101517AL3-278	342.629	110980	1.58452	11.7041	0.678642	2.68415	1.28058	0.227947	1.08597	0.848029	1323.73	12.9954	1324.1	9.47365	1324.68	13.1425	1324.68	13.1425	99.9282
101517AL3-279	127.854	185875	1.16238	9.80526	0.573732	3.94031	0.824195	0.280335	0.591717	0.717933	1593.05	8.35193	1622	6.67486	1659.76	10.6225	1659.76	10.6225	95.981
101517AL3-280	408.847	186169	2.27793	9.99738	0.530989	4.07848	1.06211	0.295851	0.91985	0.866061	1670.7	13.538	1650.01	8.66111	1623.74	9.87659	1623.74	9.87659	102.892
101517AL3-281	488.525	1.12794e+06	2.70478	10.8697	0.592734	3.34283	1.16727	0.263647	1.00558	0.861478	1508.47	13.5248	1491.12	9.12338	1466.51	11.2577	1466.51	11.2577	102.861
101517AL3-282	1465.86	168629	3.82054	11.084	0.780776	2.501	1.39357	0.20114	1.15431	0.82831	1181.44	12.4608	1272.33	10.1087	1429.34	14.9038	1429.34	14.9038	82.6564
101517AL3-283	1730.55	44228.8	1.14388	20.0596	0.834573	0.170412	1.27402	0.0248033	0.962611	0.755569	157.941	1.50189	159.776	1.88351	187.039	19.4373	157.941	1.50189	NA
101517AL3-284	482.735	231535	3.02757	11.0405	0.640506	3.02797	1.35655	0.242565	1.19582	0.881515	1400.02	15.0486	1414.7	10.3549	1436.85	12.2138	1436.85	12.2138	97.4369
101517AL3-285	578.253	94594	1.50609	9.71276	0.599022	3.35526	2.40827	0.23646	2.33258	0.968571	1368.27	28.7564	1494.02	18.8407	1677.29	11.0678	1677.29	11.0678	81.5761
101517AL3-286	283.686	441736	2.03772	8.94547	0.619225	5.00531	1.01328	0.324879	0.802055	0.791545	1813.51	12.6785	1820.22	8.57559	1827.89	11.2268	1827.89	11.2268	99.2136
101517AL3-287	410.325	431360	1.92028	9.0263	0.672572	4.76049	1.37919	0.311781	1.20408	0.873035	1749.46	18.4486	1777.96	11.5735	1811.56	12.2184	1811.56	12.2184	96.5721
101517AL3-288	620.806	1.20386e+06	1.8087	9.80106	0.632564	3.89199	1.48626	0.276779	1.34493	0.904908	1575.12	18.7948	1612.02	12.0069	1660.55	11.7108	1660.55	11.7108	94.8554
101517AL3-291	208.037	89856.9	1.94933	13.357	0.722422	1.75702	1.2669	0.170283	1.04074	0.821485	1013.67	9.76202	1029.75	8.19817	1064.09	14.5191	1064.09	14.5191	95.2621
101517AL3-292	450.677	100141	1.68429	12.286	0.610717	2.03912	1.40338	0.181777	1.26353	0.900346	1076.68	12.5287	1128.67	9.56122	1230.13	11.9808	1230.13	11.9808	87.5253
101517AL3-293	328.471	433878	3.93744	8.95114	0.61191	4.5183	1.58918	0.293455	1.46664	0.922896	1658.77	21.4504	1734.34	13.2128	1826.74	11.0956	1826.74	11.0956	90.805
101517AL3-295	727.554	731429	2.80761	9.58932	0.687016	4.35091	1.30017	0.302731	1.10383	0.848992	1704.83	16.5358	1703.07	10.7349	1700.88	12.654	1700.88	12.654	100.232
101517AL3-296	182.489	5479.57	1.69616	13.2206	6.26224	0.130328	6.44651	0.0125019	1.5303	0.237384	80.0926	1.21807	124.392	7.54736	1084.68	125.679	80.0926	1.21807	NA
101517AL3-297	874.429	95757.3	0.853908	18.0449	0.585436	0.466525	1.12734	0.0610825	0.963413	0.854588	382.205	3.57518	388.786	3.64144	428.109	13.0533	382.205	3.57518	NA
101517AL3-298	1998.52	62284.4	8.1926	20.0277	0.881547	0.0556404	1.40162	0.00808553	1.08968	0.777445	51.9131	0.563414	54.9806	0.750125	190.791	20.5069	51.9131	0.563414	NA
101517AL3-301	3724.54	317316	1.98272	20.8681	0.681759	0.0692311	1.28455	0.0104827	1.0887	0.847536	67.2239	0.728065	67.9695	0.84452	94.2914	16.1538	67.2239	0.728065	NA
101517AL3-303	231.653	3.525e+06	0.968086	10.7833	0.502621	3.25175	0.992849	0.254423	0.856225	0.862392	1461.25	11.1949	1469.6	7.71029	1481.66	9.52683	1481.66	9.52683	98.6223
101517AL3-304	324.063	260976	1.07015	5.88211	0.472741	10.3758	0.856763	0.442837	0.714534	0.833992	2363.33	14.1374	2468.89	7.93486	2556.97	7.91121	2556.97	7.91121	92.4271
101517AL3-305	467.339	201500	0.982844	11.7157	0.699563	2.73739	1.35129	0.232698	1.15611	0.855562	1348.62	14.0687	1338.67	10.0499	1322.77	13.551	1322.77	13.551	101.955
101517AL3-306	1605.52	115431	1.6855	10.6875	0.669324	2.8508	1.20653	0.221069	1.00385	0.832016	1287.52	11.7159	1369.02	9.06974	1498.56	12.658	1498.56	12.658	85.9172
101517AL3-307	104.811	80581	1.14116	11.3856	0.706928	2.69699	1.27375	0.222804	1.05958	0.831853	1296.67	12.4456	1327.63	9.43537	1377.92	13.5889	1377.92	13.5889	94.1037
101517AL3-309	72.9576	26291.1	0.568016	13.7484	1.09671	1.53824	1.56771	0.153449	1.12025	0.714575	920.269	9.60726	945.799	9.6472	1005.69	22.247	1005.69	22.247	91.5061
101517AL3-310	1037.19	1.31979e+06	61.1398	14.0015	0.6408	1.61441	1.35186	0.164012	1.19034	0.880517	979.035	10.812	975.823	8.4764	968.617	13.0948	968.617	13.0948	101.076
101517AL3-311	206.785	142974	1.34105	11.143	0.572568	3.01234	1.27876	0.243554	1.14341	0.894157	1405.15	14.4362	1410.75	9.7485	1419.2	10.9444	1419.2	10.9444	99.0098
101517AL3-313	139.243	95293.3	0.992939	7.30804	0.738369	7.30402	1.34886	0.387303	1.12882	0.836869	2110.31	20.3153	2149.3	12.0473	2186.76	12.8423	2186.76	12.8423	96.504
101517AL3-314	282.705	176035	1.8022	11.4998	0.584903	2.7356	1.19592	0.22826	1.04313	0.872238	1325.37	12.4967	1338.18	8.89273	1358.71	11.2742	1358.71	11.2742	97.5463
Sample 101517AL4: (Lat/Long: 46.52405, -112.918)--NAD 1983 coordinate system
101517AL4-0	579.401	188371	1.08978	10.8838	0.770124	3.02322	1.65169	0.238748	1.46116	0.884645	1380.18	18.154	1413.5	12.6031	1464.05	14.6318	1464.05	14.6318	94.2716
101517AL4-2	316.546	150668	2.22443	10.6525	0.522979	3.36953	1.11911	0.26044	0.989393	0.88409	1492.09	13.1787	1497.34	8.7629	1504.76	9.88216	1504.76	9.88216	99.158
101517AL4-3	253.903	52175.8	0.582931	14.2324	0.543193	1.44252	0.766668	0.148966	0.541038	0.7057	895.163	4.52194	906.768	4.59753	935.127	11.1525	935.127	11.1525	95.7264
101517AL4-4	838.13	6.53695e+06	1.83267	10.2437	0.624577	3.80491	1.11928	0.282807	0.928813	0.82983	1605.49	13.2001	1593.78	8.99994	1578.33	11.6864	1578.33	11.6864	101.721
101517AL4-5	533.67	7.61739e+06	1.7599	11.2907	0.62591	3.10106	1.24428	0.25405	1.0754	0.86427	1459.33	14.0441	1432.96	9.55381	1393.99	12.0051	1393.99	12.0051	104.687
101517AL4-6	421.331	184574	3.26186	9.13775	0.509837	3.97281	3.37012	0.263406	3.33133	0.988491	1507.24	44.7739	1628.66	27.3449	1789.24	9.28708	1789.24	9.28708	84.2394
101517AL4-7	3667.04	371772	0.752491	20.6236	0.658415	0.0701534	1.02381	0.0104979	0.784007	0.765777	67.321	0.525055	68.845	0.681475	122.113	15.496	67.321	0.525055	NA
101517AL4-8	415.01	112769	1.56974	11.0829	0.526971	3.03219	0.958935	0.243835	0.80116	0.835469	1406.6	10.1244	1415.76	7.32221	1429.54	10.0587	1429.54	10.0587	98.3955
101517AL4-9	132.659	91832.5	2.05513	7.85868	0.623277	6.65313	1.06406	0.379371	0.862413	0.81049	2073.34	15.2903	2066.42	9.39283	2059.51	10.9977	2059.51	10.9977	100.672
101517AL4-10	59.5082	45057.7	2.16324	8.59105	0.889822	5.41177	1.29811	0.337345	0.945148	0.728096	1873.88	15.3691	1886.72	11.1255	1900.86	15.9923	1900.86	15.9923	98.5807
101517AL4-11	272.629	107135	1.91988	13.3551	0.529313	1.84803	1.03157	0.179079	0.885422	0.858322	1061.94	8.66902	1062.73	6.79675	1064.37	10.6406	1064.37	10.6406	99.7719
101517AL4-12	989.258	278000	5.25772	8.40431	0.701106	4.71542	1.28532	0.287548	1.07727	0.83813	1629.26	15.5092	1769.98	10.7679	1940.27	12.5433	1940.27	12.5433	83.9712
101517AL4-13	126.551	46657.6	2.24948	10.691	0.71044	3.24971	1.11968	0.252087	0.865429	0.772922	1449.23	11.2322	1469.11	8.69403	1497.93	13.4367	1497.93	13.4367	96.7486
101517AL4-14	57.8941	24544.9	1.03918	10.6099	0.874422	3.17955	1.27792	0.244773	0.931916	0.729244	1411.46	11.8132	1452.2	9.87151	1512.33	16.505	1512.33	16.505	93.3301
101517AL4-15	90.5498	54193	2.65375	9.90422	0.659756	3.98963	1.07943	0.286709	0.854331	0.791468	1625.06	12.2717	1632.09	8.7639	1641.14	12.2464	1641.14	12.2464	99.0202
101517AL4-16	204.001	87545.5	1.77083	9.55277	0.605719	4.07318	1.251	0.282326	1.09458	0.874965	1603.07	15.5353	1648.95	10.199	1707.91	11.1465	1707.91	11.1465	93.8612
101517AL4-17	2404.48	103541	4.7947	20.997	0.886437	0.077268	1.2673	0.0117719	0.905688	0.714662	75.4431	0.679297	75.5732	0.922963	79.6654	21.0329	75.4431	0.679297	NA
101517AL4-19	566.341	203280	2.85592	11.6304	0.486736	2.807	1.34291	0.236877	1.25159	0.932003	1370.44	15.4518	1357.41	10.0542	1336.91	9.41001	1336.91	9.41001	102.508
101517AL4-20	129.586	99143.4	2.26411	10.6502	0.580791	3.36931	0.989271	0.260367	0.800837	0.809522	1491.72	10.6648	1497.29	7.74608	1505.17	10.974	1505.17	10.974	99.1065
101517AL4-21	183.238	129137	4.48142	13.7102	0.612034	1.69106	0.962291	0.168224	0.742576	0.771675	1002.32	6.89322	1005.16	6.14012	1011.34	12.4077	1011.34	12.4077	99.1079
101517AL4-22	139.047	100449	1.79266	9.47333	0.771568	4.48454	1.17067	0.308254	0.880425	0.75207	1732.11	13.373	1728.11	9.71974	1723.26	14.1733	1723.26	14.1733	100.513
101517AL4-23	626.057	294951	3.04561	9.27324	0.735178	4.51692	1.39783	0.303922	1.18888	0.85052	1710.73	17.8636	1734.09	11.6211	1762.38	13.4391	1762.38	13.4391	97.0692
101517AL4-24	1197.27	36552.5	4.81187	20.9093	1.01126	0.0703933	1.33041	0.0106797	0.864497	0.649797	68.4806	0.588879	69.0726	0.88839	89.6438	23.9569	68.4806	0.588879	NA
101517AL4-25	208.491	503037	2.2969	5.50921	0.69849	12.7979	1.19718	0.511582	0.972296	0.812153	2663.38	21.213	2664.89	11.2755	2666.02	11.5714	2666.02	11.5714	99.9009
101517AL4-28	351.956	125573	7.89311	4.39969	0.503814	18.9011	1.53281	0.603386	1.44764	0.944439	3043.47	35.1189	3036.78	14.7828	3032.35	8.07763	3032.35	8.07763	100.367
101517AL4-30	754.137	403935	5.73228	9.36932	0.518109	4.57991	1.21461	0.311353	1.09856	0.904457	1747.36	16.8142	1745.62	10.123	1743.52	9.49146	1743.52	9.49146	100.22
101517AL4-31	388.757	158897	161.84	13.6312	0.698029	1.70786	1.21327	0.168917	0.992366	0.817924	1006.14	9.24445	1011.48	7.77004	1023.04	14.1266	1023.04	14.1266	98.3482
101517AL4-32	329.866	124725	2.38188	16.1377	0.684201	0.899677	1.25665	0.105345	1.05405	0.838783	645.659	6.47587	651.555	6.04303	672.036	14.6452	645.659	6.47587	96.0751
101517AL4-33	1058.88	55777.1	6.13578	21.1637	0.786071	0.0698698	1.4142	0.0107292	1.17561	0.831289	68.7966	0.804479	68.5759	0.937777	60.8865	18.7214	68.7966	0.804479	NA
101517AL4-34	241.253	771106	1.99582	11.1712	0.616935	3.04014	1.16745	0.246423	0.991121	0.848965	1420	12.6317	1417.76	8.92021	1414.37	11.8002	1414.37	11.8002	100.398
101517AL4-35	205.372	101079	2.48071	9.71893	0.670159	4.19026	1.35107	0.295493	1.17314	0.86831	1668.92	17.2497	1672.12	11.0758	1676.11	12.384	1676.11	12.384	99.5709
101517AL4-36	533.058	3.85453e+06	2.75832	9.0981	0.415416	4.98285	1.12953	0.32894	1.05036	0.929914	1833.24	16.7598	1816.42	9.55233	1797.15	7.56119	1797.15	7.56119	102.008
101517AL4-37	197.082	67681.4	2.45563	17.793	0.723801	0.471808	1.4787	0.0609119	1.28944	0.872012	381.169	4.77247	392.437	4.81313	459.404	16.0567	381.169	4.77247	NA
101517AL4-38	243.87	209262	2.83585	8.33174	0.688456	5.78914	1.25032	0.349975	1.04371	0.834753	1934.48	17.4425	1944.79	10.826	1955.77	12.2924	1955.77	12.2924	98.9116
101517AL4-40	482.342	127959	2.2832	11.8239	0.691607	2.53906	1.18258	0.217831	0.959258	0.811157	1270.41	11.0608	1283.3	8.61501	1304.94	13.4317	1304.94	13.4317	97.3536
101517AL4-41	600.952	118332	2.959	12.4927	0.660463	2.26958	1.49307	0.205726	1.33905	0.896842	1206.01	14.7284	1202.89	10.524	1197.27	13.0254	1197.27	13.0254	100.73
101517AL4-42	437.18	71852.2	2.73173	9.29933	0.690656	4.56787	1.53178	0.308215	1.36724	0.892582	1731.92	20.7653	1743.43	12.7607	1757.24	12.6333	1757.24	12.6333	98.5588
101517AL4-43	1247.07	97164.3	2.37294	16.6898	0.489076	0.705099	1.31936	0.0853866	1.22536	0.928756	528.195	6.21423	541.832	5.53984	599.607	10.5767	528.195	6.21423	88.0902
101517AL4-44	660.015	4.86622e+07	0.614606	10.7125	0.501743	3.25503	1.19694	0.253007	1.0867	0.907899	1453.97	14.1452	1470.38	9.29752	1494.14	9.49432	1494.14	9.49432	97.3114
101517AL4-45	879.975	259056	1.82233	13.1405	4.03736	0.263526	5.39361	0.0251259	3.57641	0.663083	159.97	5.65079	237.504	11.4226	1096.85	80.8558	159.97	5.65079	NA
101517AL4-47	183.184	1.7533e+06	1.23075	9.8484	0.575397	3.89516	0.985645	0.278342	0.800258	0.811914	1583.01	11.2326	1612.68	7.96375	1651.62	10.6661	1651.62	10.6661	95.8454
101517AL4-48	452.927	354406	1.30694	6.04491	0.589333	10.6028	1.24949	0.46505	1.10178	0.881782	2461.82	22.5456	2488.96	11.5942	2511.17	9.90776	2511.17	9.90776	98.0347
101517AL4-49	1266.45	591664	3.71357	10.8611	0.714537	2.82605	2.18704	0.222711	2.06703	0.945123	1296.18	24.2707	1362.47	16.4042	1468.02	13.5684	1468.02	13.5684	88.2944
101517AL4-50	52.261	25181.9	3.63403	9.07523	0.807963	4.48022	1.22481	0.295016	0.92052	0.751561	1666.54	13.5183	1727.31	10.1675	1801.73	14.698	1801.73	14.698	92.4967
101517AL4-51	726.664	66145.5	7.86562	11.6125	0.66275	0.52637	1.41553	0.0443511	1.25079	0.883623	279.747	3.42422	429.398	4.95659	1339.89	12.8073	279.747	3.42422	NA
101517AL4-52	184.644	81179.6	1.56697	8.3017	0.759349	5.70274	1.18858	0.343509	0.914396	0.769316	1903.53	15.0713	1931.78	10.2685	1962.22	13.5482	1962.22	13.5482	97.0092
101517AL4-53	507.884	152938	3.32727	10.8729	0.562927	3.30903	1.57481	0.261056	1.47076	0.933929	1495.24	19.6273	1483.18	12.28	1465.96	10.6924	1465.96	10.6924	101.998
101517AL4-54	820.008	605408	3.42478	13.046	0.541296	1.97187	1.16844	0.186656	1.03549	0.88622	1103.24	10.4998	1105.95	7.87213	1111.27	10.8212	1111.27	10.8212	99.2774
101517AL4-55	209.803	20285.7	2.97741	12.7075	1.21941	1.98517	1.40017	0.18304	0.688123	0.491457	1083.56	6.86325	1110.48	9.45479	1163.56	24.1691	1163.56	24.1691	93.1242
101517AL4-56	228.965	76960.4	2.18543	13.6041	0.947033	1.66028	1.40399	0.163885	1.0365	0.73825	978.333	9.40843	993.484	8.89735	1027.07	19.1731	1027.07	19.1731	95.2547
101517AL4-59	1796.46	44085.8	0.883925	20.9003	0.950551	0.0705976	1.38618	0.0107061	1.00893	0.72785	68.649	0.688944	69.2663	0.928136	90.637	22.5381	68.649	0.688944	NA
101517AL4-60	113.032	111160	1.46354	12.4414	0.57104	2.35897	0.943663	0.21295	0.751275	0.796126	1244.52	8.50262	1230.27	6.7293	1205.42	11.2679	1205.42	11.2679	103.244
101517AL4-61	341.502	988666	2.31127	12.7046	0.622329	1.99834	1.40733	0.184212	1.26225	0.896913	1089.94	12.6576	1114.95	9.52414	1164.01	12.3509	1164.01	12.3509	93.6366
101517AL4-62	750.376	239033	1.68646	14.0087	0.498495	1.65044	1.04947	0.167759	0.923522	0.879988	999.754	8.55262	989.72	6.63572	967.53	10.1743	967.53	10.1743	103.331
101517AL4-63	604.478	313130	6.18508	10.827	0.585366	3.22478	1.31289	0.253335	1.17518	0.895103	1455.65	15.3127	1463.13	10.1758	1473.99	11.1066	1473.99	11.1066	98.7561
101517AL4-64	562.345	283753	2.6618	10.0101	0.588443	3.94435	1.87564	0.286486	1.78095	0.949513	1623.94	25.5664	1622.83	15.1942	1621.37	10.9488	1621.37	10.9488	100.159
101517AL4-66	678.362	161850	3.12568	10.6883	0.515515	3.41194	0.913594	0.264605	0.754254	0.825589	1513.36	10.1737	1507.15	7.17402	1498.41	9.74937	1498.41	9.74937	100.998
101517AL4-67	558.868	31307.3	2.27698	13.211	5.4845	0.18596	7.34252	0.0178256	4.88188	0.664879	113.899	5.51158	173.176	11.6908	1086.13	110.025	113.899	5.51158	NA
101517AL4-69	231.842	12442.4	2.28689	20.3825	2.16312	0.16458	2.35381	0.0243401	0.928091	0.394293	155.027	1.42163	154.704	3.37762	149.758	50.7108	155.027	1.42163	NA
101517AL4-70	535.556	766768	2.63047	5.21353	0.491724	14.0774	1.19793	0.532526	1.09235	0.91187	2752.09	24.469	2754.93	11.3573	2757	8.07728	2757	8.07728	99.8217
101517AL4-71	63.146	33587	2.5062	11.7792	0.877796	2.59637	1.30788	0.221906	0.969555	0.741315	1291.94	11.3507	1299.61	9.5877	1312.29	17.0301	1312.29	17.0301	98.449
101517AL4-72	659.877	296892	0.778884	19.4581	0.796679	0.278693	1.18601	0.0393474	0.878594	0.740797	248.786	2.14418	249.62	2.6247	257.462	18.3064	248.786	2.14418	NA
101517AL4-73	437.261	288131	1.91792	5.548	0.557907	12.6578	1.06332	0.509546	0.9052	0.851297	2654.69	19.697	2654.53	10.0066	2654.39	9.25278	2654.39	9.25278	100.011
101517AL4-74	203.448	47843.3	2.08345	20.7171	2.06047	0.0693937	2.38113	0.0104313	1.19341	0.501194	66.896	0.794214	68.1239	1.5689	111.436	48.664	66.896	0.794214	NA
101517AL4-76	53.1429	79256.8	2.94026	5.32316	0.593537	13.3306	1.03143	0.514881	0.843539	0.817836	2677.44	18.4822	2703.35	9.74244	2722.77	9.78042	2722.77	9.78042	98.3348
101517AL4-77	33.2794	31609.9	2.14805	8.10392	0.839008	6.25951	1.75575	0.368064	1.54231	0.878435	2020.28	26.7492	2012.81	15.373	2005.13	14.8951	2005.13	14.8951	100.756
101517AL4-78	56.3522	64920.1	2.04091	8.62146	0.708184	5.32966	1.4022	0.333402	1.21022	0.863088	1854.85	19.507	1873.63	11.9889	1894.51	12.737	1894.51	12.737	97.9067
101517AL4-79	727.872	818914	1.25947	9.5611	0.709656	3.73053	1.58315	0.258801	1.41519	0.893906	1483.71	18.7561	1577.94	12.6776	1706.31	13.0621	1706.31	13.0621	86.9543
101517AL4-80	150.973	84781.2	2.32984	12.6613	0.587988	2.15778	1.02919	0.198232	0.844693	0.820734	1165.81	9.00845	1167.56	7.141	1170.81	11.6596	1170.81	11.6596	99.5733
101517AL4-81	1046.15	239001	3.01042	8.78372	0.608398	5.04433	1.09558	0.321492	0.911123	0.831636	1797.01	14.289	1826.8	9.28412	1860.91	10.9863	1860.91	10.9863	96.5664
101517AL4-82	866.142	14632.8	3.44731	20.3494	1.54933	0.0731403	1.86778	0.0107993	1.04316	0.558502	69.2435	0.718456	71.6751	1.29258	153.584	36.2937	69.2435	0.718456	NA
101517AL4-83	661.349	432043	1.64268	8.46209	0.778769	5.23991	1.43738	0.321728	1.20813	0.84051	1798.16	18.9575	1859.13	12.2566	1928	13.9509	1928	13.9509	93.2657
101517AL4-84	97.7474	60169.5	0.872396	9.10212	0.678851	4.71284	1.23814	0.311253	1.03545	0.836294	1746.87	15.8444	1769.53	10.3716	1796.35	12.3574	1796.35	12.3574	97.2454
101517AL4-85	80.4837	111063	1.15299	5.53521	0.594397	12.1571	1.33124	0.488262	1.19117	0.894785	2563.15	25.1924	2616.6	12.4905	2658.22	9.85433	2658.22	9.85433	96.4237
101517AL4-86	2445.39	408425	8.17937	10.9701	1.11718	0.797605	1.80965	0.0634872	1.42363	0.786692	396.798	5.47861	595.477	8.15317	1449.03	21.2689	396.798	5.47861	NA
101517AL4-87	87.0414	409321	3.13557	12.5552	1.12224	1.9614	2.21256	0.17868	1.90682	0.861819	1059.76	18.6342	1102.36	14.8807	1187.45	22.1768	1187.45	22.1768	89.2466
101517AL4-88	320.443	68377.9	1.47795	17.8124	0.721927	0.555949	0.962321	0.0718532	0.636305	0.661219	447.311	2.74976	448.886	3.49133	456.989	16.0257	447.311	2.74976	97.8822
101517AL4-89	159.467	7.69014e+06	3.36857	12.7063	0.68579	2.10767	1.16801	0.194317	0.94548	0.809481	1144.72	9.91659	1151.32	8.04363	1163.74	13.6095	1163.74	13.6095	98.3654
101517AL4-90	194.246	97119.7	3.9148	9.09859	0.578506	4.7727	0.923415	0.315084	0.719741	0.779433	1765.68	11.1165	1780.11	7.75212	1797.06	10.5299	1797.06	10.5299	98.2539
101517AL4-91	657.134	279235	1.13024	8.18891	0.573411	5.95381	1.0088	0.35376	0.829984	0.822745	1952.53	13.9816	1969.12	8.77036	1986.59	10.2031	1986.59	10.2031	98.2855
101517AL4-92	845.558	170237	2.66848	8.6838	0.747622	5.04882	1.53332	0.318117	1.33871	0.873076	1780.53	20.8275	1827.55	12.9959	1881.54	13.4673	1881.54	13.4673	94.6313
101517AL4-94	234.905	688098	2.83884	5.82584	0.656776	11.8989	1.30939	0.502982	1.13276	0.865106	2626.6	24.4376	2596.48	12.2652	2573.05	10.9779	2573.05	10.9779	102.081
101517AL4-96	609.2	8632.78	1.61541	21.7537	1.55999	0.0669719	1.90449	0.0105709	1.09247	0.573629	67.7869	0.736671	65.8219	1.2138	NA	NA	67.7869	0.736671	NA
101517AL4-97	395.496	601542	2.50397	9.35783	0.583386	4.71735	1.06336	0.320303	0.889046	0.83607	1791.21	13.9037	1770.33	8.90894	1745.76	10.6845	1745.76	10.6845	102.603
101517AL4-98	330.519	878045	1.33752	8.56944	0.555013	5.70709	1.44493	0.354858	1.33409	0.923287	1957.76	22.525	1932.44	12.4848	1905.39	9.97066	1905.39	9.97066	102.748
101517AL4-99	260.547	79455.2	4.60398	9.23477	0.54023	4.59778	1.23082	0.308079	1.10592	0.898526	1731.25	16.7908	1748.87	10.2653	1769.98	9.866	1769.98	9.866	97.8118
101517AL4-101	381.732	46204.5	1.86005	17.5761	0.686967	0.599568	1.06238	0.0764623	0.810387	0.762804	474.972	3.71073	476.959	4.04341	486.538	15.1552	474.972	3.71073	97.6228
101517AL4-102	317.709	3723.85	1.92041	8.80761	16.4866	0.202246	16.6151	0.0129248	2.06214	0.124113	82.7851	1.69623	187.025	28.3878	1856	300.035	82.7851	1.69623	NA
101517AL4-104	384.605	120312	1.63165	17.0108	0.77871	0.716475	1.42403	0.0884327	1.19226	0.837241	546.261	6.24454	548.584	6.03558	558.222	16.9701	546.261	6.24454	97.8573
101517AL4-105	20.1835	41736.3	1.30941	5.35259	0.557377	12.4222	1.25797	0.482449	1.12775	0.896485	2537.92	23.6595	2636.86	11.8221	2713.68	9.19243	2713.68	9.19243	93.5232
101517AL4-106	334.983	233193	2.74097	9.85668	0.582969	3.99783	1.17797	0.285919	1.0236	0.868953	1621.1	14.6716	1633.76	9.56794	1650.06	10.8086	1650.06	10.8086	98.2448
101517AL4-107	215.959	83603.5	3.61388	12.7424	0.689555	2.05621	0.951374	0.19011	0.655459	0.68896	1121.97	6.74967	1134.36	6.49938	1158.13	13.6882	1158.13	13.6882	96.8778
101517AL4-108	1378.66	110347	11.3144	13.4799	1.51661	0.162853	1.73174	0.0159284	0.835946	0.482721	101.872	0.844899	153.197	2.46255	1045.63	30.6084	101.872	0.844899	NA
101517AL4-109	395.298	515825	5.7431	6.2983	0.609803	9.37997	1.61896	0.428659	1.49973	0.92635	2299.67	29.008	2375.87	14.8561	2441.89	10.3265	2441.89	10.3265	94.1761
101517AL4-110	203.037	1.42488e+06	3.42641	12.6168	0.692287	2.11863	1.30265	0.193951	1.10346	0.847092	1142.74	11.5554	1154.89	8.98587	1177.78	13.7106	1177.78	13.7106	97.0257
101517AL4-112	391.293	9212.26	2.28607	20.709	2.04798	0.0724077	2.27751	0.0108801	0.996402	0.437496	69.7588	0.691331	70.9817	1.56141	112.388	48.3515	69.7588	0.691331	NA
101517AL4-113	385.699	383218	1.84531	9.93613	0.60995	3.9943	1.14686	0.287969	0.971214	0.846844	1631.37	13.9983	1633.04	9.31365	1635.17	11.3306	1635.17	11.3306	99.768
101517AL4-114	124.229	801431	1.86421	10.1305	0.631327	3.72372	1.47475	0.273713	1.33278	0.903736	1559.62	18.463	1576.48	11.8048	1599.1	11.7824	1599.1	11.7824	97.5314
101517AL4-115	81.8302	63436.9	0.720818	11.7212	0.786618	2.5648	1.51375	0.218129	1.29332	0.854381	1271.98	14.9295	1290.66	11.0591	1321.85	15.2402	1321.85	15.2402	96.2273
101517AL4-116	214.117	149568	1.81147	12.9812	0.677623	1.69415	1.14121	0.159571	0.91825	0.80463	954.395	8.14586	1006.33	7.28673	1121.21	13.5327	1121.21	13.5327	85.1218
101517AL4-117	268.783	5773.86	2.6419	20.3549	2.34579	0.0744866	2.59033	0.0110011	1.09868	0.424147	70.5301	0.770678	72.9481	1.82332	152.96	54.9543	70.5301	0.770678	NA
101517AL4-118	120.712	101263	1.03997	13.3221	0.798227	1.8203	1.28968	0.175955	1.01297	0.785444	1044.84	9.77075	1052.79	8.4522	1069.34	16.042	1069.34	16.042	97.709
101517AL4-119	1414.85	56213.2	3.04226	20.7894	0.85499	0.0692899	1.07432	0.010452	0.650511	0.605507	67.0281	0.433766	68.0254	0.706871	103.26	20.213	67.0281	0.433766	NA
101517AL4-120	343.574	84903.3	1.01296	17.7465	0.987022	0.278243	1.5331	0.0358282	1.1731	0.765186	226.922	2.61572	249.263	3.38854	465.187	21.866	226.922	2.61572	NA
101517AL4-121	745.698	501560	2.11978	5.79924	0.556389	11.1819	1.2616	0.470518	1.13228	0.897498	2485.83	23.355	2538.41	11.759	2580.69	9.2929	2580.69	9.2929	96.3243
101517AL4-122	147.307	1.79541e+06	1.46381	13.3483	0.684587	1.8512	1.36955	0.179294	1.18617	0.866104	1063.11	11.6254	1063.86	9.02909	1065.4	13.7663	1065.4	13.7663	99.7857
101517AL4-123	394.194	166543	3.55673	13.36	0.550865	1.85599	1.32104	0.179916	1.20071	0.90891	1066.52	11.8025	1065.56	8.71718	1063.63	11.0792	1063.63	11.0792	100.272
101517AL4-124	58.8392	208731	1.68665	12.4794	0.808463	2.10652	1.32457	0.190743	1.04922	0.792124	1125.4	10.8347	1150.94	9.12025	1199.38	15.935	1199.38	15.935	93.8318
101517AL4-125	1182.84	50627.7	4.27811	19.5196	0.682879	0.198367	1.09866	0.0280949	0.860662	0.783371	178.614	1.51616	183.743	1.84661	250.193	15.6997	178.614	1.51616	NA
101517AL4-126	138.589	70150.5	1.67969	13.4175	0.698069	1.69269	1.30727	0.164792	1.10529	0.845492	983.35	10.0805	1005.78	8.34443	1054.99	14.0781	1054.99	14.0781	93.2096
101517AL4-127	160.613	190217	3.59974	15.953	0.951545	0.969518	1.34944	0.112224	0.956842	0.709066	685.652	6.22376	688.215	6.74505	696.597	20.2663	685.652	6.22376	98.4288
101517AL4-129	361.112	103218	1.98117	13.3797	0.566631	1.91524	1.58065	0.185933	1.4756	0.933538	1099.31	14.9136	1086.41	10.5446	1060.66	11.4027	1060.66	11.4027	103.643
101517AL4-131	351.705	112556	2.22631	17.828	0.703556	0.537537	1.23509	0.0695343	1.01512	0.821896	433.35	4.25441	436.799	4.38445	455.006	15.614	433.35	4.25441	95.2403
101517AL4-132	1468.26	310695	6.5329	20.2884	0.683824	0.0708248	1.17289	0.0104261	0.952925	0.812456	66.8629	0.633861	69.4818	0.787691	160.615	15.9956	66.8629	0.633861	NA
101517AL4-134	72.792	125613	1.60617	12.6463	0.65652	2.14569	1.20542	0.196887	1.01095	0.838669	1158.58	10.7204	1163.66	8.34887	1173.16	13.012	1173.16	13.012	98.7573
101517AL4-135	359.155	183889	4.79289	9.15644	0.579628	4.97784	1.04843	0.330716	0.873636	0.833279	1841.85	13.9965	1815.57	8.86497	1785.51	10.5635	1785.51	10.5635	103.155
101517AL4-138	38.607	26129.3	0.982905	5.26317	0.705321	13.4256	1.28542	0.512707	1.07463	0.836013	2668.17	23.4797	2710.06	12.1477	2741.43	11.5993	2741.43	11.5993	97.3279
101517AL4-139	140.273	4074.87	801.087	20.7834	3.24795	0.100061	3.51126	0.0150893	1.33406	0.379937	96.5456	1.27838	96.8328	3.24297	103.888	76.7686	96.5456	1.27838	NA
101517AL4-140	618.237	656833	2.00446	8.47859	0.554786	5.54092	1.07438	0.340874	0.920053	0.85636	1890.87	15.0778	1906.97	9.24148	1924.51	9.94193	1924.51	9.94193	98.252
101517AL4-141	934.039	267323	1.51234	17.9428	0.678231	0.501259	1.0573	0.0652589	0.811099	0.767143	407.528	3.20315	412.555	3.58456	440.749	15.1028	407.528	3.20315	92.4628
101517AL4-144	885.121	2.25725e+06	4.66962	9.99043	2.17661	0.640971	4.40161	0.0464633	3.82578	0.869177	292.772	10.9503	502.907	17.4591	1625.04	40.4869	292.772	10.9503	NA
101517AL4-145	288.282	158697	0.888275	9.92019	0.501166	3.91087	1.11444	0.281502	0.995391	0.893178	1598.92	14.0953	1615.93	9.01181	1638.15	9.30615	1638.15	9.30615	97.6054
101517AL4-146	748.489	44245.7	4.20712	9.46355	0.915083	4.42724	1.51691	0.304001	1.20981	0.79755	1711.12	18.1817	1717.45	12.5651	1725.16	16.8057	1725.16	16.8057	99.1858
101517AL4-147	71.6623	46796.2	0.929196	11.1006	0.66644	2.99964	1.15935	0.241603	0.94866	0.818267	1395.02	11.9	1407.53	8.82886	1426.49	12.7262	1426.49	12.7262	97.7941
101517AL4-148	459.046	31794.6	1.09449	20.2154	1.50111	0.081704	1.80723	0.0119843	1.00635	0.556847	76.7965	0.768255	79.7458	1.38605	169.003	35.0701	76.7965	0.768255	NA
101517AL4-150	42.8969	23681.9	0.472392	12.4929	0.900677	1.9483	3.17541	0.176606	3.04499	0.95893	1048.41	29.4634	1097.86	21.3097	1197.25	17.7436	1197.25	17.7436	87.5681
101517AL4-151	767.627	19201.3	1.19248	21.1125	1.3326	0.0745787	1.75205	0.0114246	1.13747	0.649223	73.2303	0.828259	73.0352	1.23467	66.6446	31.7262	73.2303	0.828259	NA
101517AL4-152	1055.48	869098	2.03731	10.9978	0.594607	3.083	1.36198	0.246018	1.22533	0.899668	1417.91	15.5961	1428.47	10.4427	1444.23	11.3272	1444.23	11.3272	98.1772
101517AL4-153	286.269	246059	2.1188	13.6404	0.513851	1.82112	0.969081	0.180241	0.821629	0.847844	1068.29	8.08868	1053.09	6.35203	1021.68	10.4014	1021.68	10.4014	104.563
101517AL4-154	134.854	792663	1.58949	13.4429	0.802669	1.79012	1.46244	0.174607	1.22248	0.835916	1037.45	11.7146	1041.87	9.52752	1051.18	16.1942	1051.18	16.1942	98.6935
101517AL4-155	453.799	141278	2.31632	10.1877	0.590878	3.79466	1.22042	0.280501	1.06784	0.87498	1593.89	15.0793	1591.62	9.80771	1588.59	11.0426	1588.59	11.0426	100.333
101517AL4-156	356.638	168680	1.04985	9.90071	0.645109	3.85531	1.52486	0.276958	1.38167	0.906101	1576.02	19.318	1604.38	12.2948	1641.8	11.9735	1641.8	11.9735	95.9937
101517AL4-157	287.793	124523	2.27363	8.97747	0.584674	5.17016	0.969888	0.33678	0.773847	0.797872	1871.16	12.5678	1847.72	8.25218	1821.41	10.6086	1821.41	10.6086	102.731
101517AL4-158	159.452	104331	2.40044	13.5063	0.689036	1.75623	1.20143	0.17211	0.984207	0.819196	1023.73	9.31628	1029.46	7.77326	1041.65	13.9246	1041.65	13.9246	98.2796
101517AL4-159	1646.15	77220.8	4.7619	16.1068	1.96475	0.126478	2.38554	0.0147813	1.35298	0.567159	94.589	1.27043	120.928	2.71964	676.13	41.9876	94.589	1.27043	NA
101517AL4-160	56.7454	97032.8	3.66009	9.93592	0.637142	3.91522	1.23205	0.282262	1.05451	0.855901	1602.75	14.9639	1616.83	9.96518	1635.21	11.8356	1635.21	11.8356	98.0149
101517AL4-162	702.06	635625	2.57229	9.8972	0.508868	3.77507	1.00688	0.271097	0.868827	0.862891	1546.37	11.9453	1587.46	8.0828	1642.46	9.44394	1642.46	9.44394	94.1499
101517AL4-163	350.569	558324	5.79581	12.8684	0.696537	2.16269	1.29692	0.201933	1.094	0.843538	1185.69	11.8485	1169.13	9.00517	1138.6	13.8556	1138.6	13.8556	104.136
101517AL4-164	95.5985	155230	1.89593	4.64426	0.527566	16.8665	1.11361	0.568369	0.98072	0.880664	2901.12	22.9112	2927.28	10.675	2945.3	8.52202	2945.3	8.52202	98.5
101517AL4-165	221.821	30129.8	1.91711	18.0379	0.998062	0.479721	1.47338	0.0627858	1.08385	0.735619	392.545	4.12764	397.881	4.85017	428.973	22.2503	392.545	4.12764	NA
101517AL4-166	281.149	42217.2	1.31308	16.3964	0.841023	0.769067	1.22335	0.0914959	0.888405	0.726207	564.378	4.80075	579.228	5.40013	637.926	18.1015	564.378	4.80075	88.4707
101517AL4-167	186.493	138936	3.85936	11.4002	0.593067	2.91307	1.16463	0.240963	1.00232	0.86063	1391.7	12.5463	1385.31	8.80366	1375.46	11.404	1375.46	11.404	101.18
101517AL4-168	624.664	27420.9	2.03709	17.9195	2.77609	0.208729	3.18087	0.0271391	1.55283	0.488177	172.618	2.6449	192.486	5.57744	443.641	61.7607	172.618	2.6449	NA
101517AL4-169	448.294	110048	4.5662	12.8889	0.517398	2.05455	0.987736	0.192141	0.84138	0.851828	1132.96	8.74185	1133.81	6.74601	1135.45	10.3122	1135.45	10.3122	99.7807
101517AL4-171	932.081	607882	20.9288	3.32692	0.652842	28.5838	1.29455	0.690002	1.11788	0.863529	3382.63	29.4226	3439.33	12.701	3472.52	10.1138	3472.52	10.1138	97.4113
101517AL4-172	228.807	59637.2	3.06624	18.0592	0.866041	0.520079	1.38811	0.0681482	1.08481	0.781503	424.989	4.46163	425.204	4.82235	426.345	19.3162	424.989	4.46163	99.682
101517AL4-173	361.455	771247	2.4537	9.91714	0.539182	4.08238	1.12145	0.293757	0.983326	0.876835	1660.27	14.393	1650.79	9.14676	1638.72	10.0114	1638.72	10.0114	101.315
101517AL4-174	126.662	10620.6	1.5218	18.0579	0.969183	0.522552	1.32403	0.0684676	0.902078	0.681311	426.917	3.72637	426.855	4.61412	426.497	21.6156	426.917	3.72637	100.098
101517AL4-175	76.4568	67751	3.28967	12.8169	0.72792	2.02211	1.26798	0.18805	1.03823	0.818802	1110.8	10.5938	1122.97	8.61486	1146.59	14.462	1146.59	14.462	96.8787
101517AL4-176	545.516	133306	2.97654	17.6095	0.749266	0.497683	1.41916	0.0635898	1.20524	0.849266	397.42	4.64522	410.132	4.78847	482.35	16.5644	397.42	4.64522	NA
101517AL4-177	1120.93	70847	3.78725	18.6425	0.675818	0.414537	1.20136	0.0560732	0.993242	0.826766	351.7	3.39965	352.138	3.57481	355.017	15.2406	351.7	3.39965	NA
101517AL4-178	240.188	198357	3.4577	9.52481	0.554714	3.72906	1.24584	0.257717	1.11553	0.895404	1478.15	14.7353	1577.63	9.97537	1713.3	10.2008	1713.3	10.2008	86.275
101517AL4-179	175.042	64308	2.75363	13.4681	0.478967	1.73783	1.08483	0.169826	0.973367	0.897254	1011.15	9.10914	1022.66	6.99196	1047.4	9.67573	1047.4	9.67573	96.5395
101517AL4-180	288.621	25579.3	0.936788	19.3579	1.09825	0.285867	1.53352	0.0401522	1.0703	0.697937	253.776	2.66341	255.301	3.46171	269.305	25.1785	253.776	2.66341	NA
101517AL4-181	303.752	61290.5	1.88308	16.9515	1.00039	0.690804	2.2498	0.084967	2.01515	0.895701	525.702	10.1732	533.283	9.33356	565.868	21.8036	525.702	10.1732	92.902
101517AL4-182	421.736	411884	2.3706	9.22541	0.520916	4.52397	1.19347	0.302826	1.07378	0.899718	1705.3	16.0895	1735.39	9.92481	1771.83	9.50927	1771.83	9.50927	96.2455
101517AL4-184	378.895	157579	1.14715	11.4516	0.720925	2.78356	1.43064	0.23129	1.23572	0.863751	1341.25	14.9635	1351.14	10.6875	1366.79	13.8804	1366.79	13.8804	98.1314
101517AL4-185	1357.18	38061.7	3.92878	14.8503	1.15469	0.154061	1.62535	0.0166002	1.14387	0.70377	106.133	1.20409	145.491	2.20313	847.35	23.9952	106.133	1.20409	NA
101517AL4-186	202.324	90829.2	4.00454	10.997	0.736226	3.11227	1.38054	0.248337	1.16784	0.845932	1429.89	14.9765	1435.73	10.6094	1444.37	14.0249	1444.37	14.0249	98.998
101517AL4-187	442.862	79489.4	2.28376	16.1654	0.702621	0.923335	1.41332	0.108301	1.2263	0.86767	662.874	7.72485	664.122	6.88942	668.373	15.0603	662.874	7.72485	99.1773
101517AL4-188	954.219	427663	3.53956	5.36604	0.554672	12.8916	1.11874	0.501936	0.971559	0.868437	2622.11	20.9308	2671.76	10.5422	2709.55	9.1514	2709.55	9.1514	96.773
101517AL4-189	170.434	219825	1.78527	10.3089	0.686266	2.90968	1.3933	0.217642	1.21257	0.870286	1269.41	13.9717	1384.43	10.5292	1566.46	12.8608	1566.46	12.8608	81.0365
101517AL4-190	215.153	167600	1.97079	9.11481	0.520198	4.73918	1.21269	0.313428	1.09545	0.903322	1757.56	16.8517	1774.2	10.1683	1793.82	9.47232	1793.82	9.47232	97.9786
101517AL4-191	537.897	98935.6	2.34532	11.2493	0.894932	2.66134	1.58635	0.217227	1.30981	0.825675	1267.21	15.0685	1317.79	11.7087	1401.03	17.1488	1401.03	17.1488	90.4481
101517AL4-192	225.333	106451	1.17562	9.66268	0.429075	4.2766	1.13395	0.299836	1.04964	0.925646	1690.5	15.6082	1688.87	9.33213	1686.83	7.91812	1686.83	7.91812	100.217
101517AL4-193	1334.18	336900	7.09705	12.7958	0.642626	1.91963	1.18542	0.178227	0.996118	0.840308	1057.28	9.71346	1087.94	7.91409	1149.82	12.7455	1149.82	12.7455	91.9518
101517AL4-194	241.239	146793	4.05806	5.24361	0.699657	13.8092	1.41044	0.525395	1.22467	0.868291	2722.02	27.1922	2736.71	13.3551	2747.55	11.5031	2747.55	11.5031	99.0708
101517AL4-196	92.657	537816	1.84855	5.16616	0.928836	13.2653	1.32767	0.497248	0.948666	0.714536	2601.96	20.3101	2698.72	12.5365	2771.99	15.2331	2771.99	15.2331	93.8662
101517AL4-197	2955.45	57944.3	8.86697	20.9283	0.746865	0.0723692	1.25198	0.0109894	1.00481	0.802577	70.456	0.704092	70.9453	0.857898	87.4911	17.709	70.456	0.704092	NA
101517AL4-198	1367.59	48810.8	4.45682	20.366	1.07274	0.0706775	1.37763	0.0104442	0.864342	0.627411	66.9784	0.575925	69.3422	0.923391	151.651	25.1115	66.9784	0.575925	NA
101517AL4-199	2100.45	10678.9	3.6251	11.4157	1.12099	0.64995	3.42937	0.0538359	3.24098	0.945066	338.029	10.6732	508.448	13.7177	1372.84	21.565	338.029	10.6732	NA
101517AL4-200	149.143	403784	3.74131	12.1962	0.568498	2.32047	1.10076	0.205347	0.942596	0.856312	1203.98	10.3519	1218.57	7.81103	1244.49	11.1345	1244.49	11.1345	96.7451
101517AL4-201	408.649	2.7147e+06	2.36225	10.0882	0.631806	3.51313	1.63706	0.257157	1.51023	0.922524	1475.28	19.9146	1530.17	12.94	1606.9	11.7794	1606.9	11.7794	91.8092
101517AL4-202	1171.06	86298	5.54044	20.4795	1.00241	0.0714305	1.50224	0.0106143	1.11889	0.744811	68.0635	0.757546	70.056	1.01693	138.636	23.5421	68.0635	0.757546	NA
101517AL4-203	1002.95	273798	4.17297	11.7074	0.647478	0.739312	5.09408	0.0628026	5.05276	0.991889	392.647	19.2474	562.004	21.9894	1324.13	12.54	392.647	19.2474	NA
101517AL4-204	86.8279	53602.5	1.33302	10.6393	0.591404	3.40074	0.926692	0.262528	0.713442	0.769881	1502.76	9.56338	1504.57	7.27144	1507.1	11.1716	1507.1	11.1716	99.7124
101517AL4-205	362.305	168220	1.84184	11.6431	0.6907	2.56181	1.23627	0.216422	1.02533	0.829372	1262.94	11.7598	1289.81	9.02882	1334.8	13.3579	1334.8	13.3579	94.6165
101517AL4-207	440.672	11010.9	4.22964	20.7435	1.59739	0.0777358	1.88294	0.0117001	0.996899	0.529438	74.9859	0.743203	76.0139	1.37903	108.444	37.7488	74.9859	0.743203	NA
101517AL4-208	138.795	107231	1.13008	11.0267	0.612526	2.6266	1.02678	0.21015	0.824072	0.802577	1229.62	9.22515	1308.11	7.55111	1439.23	11.6765	1439.23	11.6765	85.4359
101517AL4-209	759.128	96033.8	1.69215	19.357	1.12979	0.187315	1.54659	0.0263087	1.05618	0.682908	167.404	1.74533	174.336	2.4775	269.408	25.9039	167.404	1.74533	NA
101517AL4-210	225.209	358520	3.67634	10.0089	0.573715	3.42016	1.0875	0.248383	0.923858	0.849522	1430.13	11.8494	1509.04	8.54435	1621.59	10.6744	1621.59	10.6744	88.193
101517AL4-211	188.624	87743.3	1.05267	9.86524	0.632239	4.10863	1.17153	0.294098	0.986288	0.841878	1661.98	14.4493	1656.02	9.56731	1648.46	11.7245	1648.46	11.7245	100.82
101517AL4-212	386.03	87742.2	1.34273	17.4211	0.557319	0.570807	1.02651	0.0721528	0.862041	0.83978	449.112	3.73975	458.536	3.78757	506.042	12.2482	449.112	3.73975	88.75
101517AL4-213	236.261	284514	2.40859	10.6459	0.61138	3.35977	1.17961	0.259524	1.0088	0.855204	1487.41	13.3998	1495.07	9.23049	1505.93	11.5508	1505.93	11.5508	98.7697
101517AL4-214	250.968	158438	0.689764	7.76924	0.434078	6.64783	1.93667	0.374754	1.88739	0.974558	2051.73	33.167	2065.72	17.0949	2079.68	7.63964	2079.68	7.63964	98.656
101517AL4-216	453.161	204175	3.68587	11.0896	0.627863	2.64584	1.09608	0.212897	0.898438	0.819679	1244.23	10.166	1313.49	8.07699	1428.37	11.9865	1428.37	11.9865	87.1085
101517AL4-217	110.737	57448.2	2.19823	17.7599	1.31872	0.495025	1.6238	0.0637903	0.947478	0.583494	398.635	3.66257	408.329	5.45942	463.536	29.2237	398.635	3.66257	NA
101517AL4-218	70.7881	441319	0.965701	10.9697	0.75284	2.99438	1.20094	0.238336	0.935676	0.779119	1378.04	11.609	1406.19	9.14156	1449.1	14.3322	1449.1	14.3322	95.0961
101517AL4-219	99.2815	116831	1.90254	10.9907	0.611843	3.00442	1.14539	0.239594	0.968278	0.845371	1384.59	12.0647	1408.74	8.72598	1445.46	11.6537	1445.46	11.6537	95.7888
101517AL4-221	398.978	854929	2.80281	12.6947	0.889214	2.02685	1.43746	0.186695	1.12942	0.785706	1103.44	11.4543	1124.56	9.77397	1165.56	17.6196	1165.56	17.6196	94.6706
101517AL4-222	1066.84	984014	0.458625	10.7627	0.583161	3.11242	1.05394	0.243056	0.8779	0.832971	1402.57	11.0657	1435.76	8.09944	1485.28	11.0481	1485.28	11.0481	94.431
101517AL4-223	392.867	1.04241e+06	2.42566	10.9401	0.521483	3.19187	1.17388	0.253369	1.05169	0.895909	1455.83	13.7051	1455.19	9.07619	1454.25	9.92082	1454.25	9.92082	100.109
101517AL4-224	303.929	347108	3.87156	13.4539	0.70515	1.74466	1.2213	0.170313	0.997163	0.816477	1013.83	9.3547	1025.19	7.88285	1049.53	14.2327	1049.53	14.2327	96.5991
101517AL4-225	359.85	108427	3.67438	10.7505	0.560748	3.28561	1.18316	0.256289	1.04184	0.880557	1470.83	13.7013	1477.65	9.21062	1487.44	10.6204	1487.44	10.6204	98.8833
101517AL4-226	1694.82	16903.5	4.0529	21.0589	0.854669	0.0675297	1.31004	0.0103185	0.992853	0.757877	66.1768	0.653677	66.3526	0.841455	72.7133	20.3132	66.1768	0.653677	NA
101517AL4-227	492.626	140189	1.15914	10.1842	0.682615	3.6733	1.28637	0.271439	1.09031	0.84759	1548.1	15.0054	1565.58	10.267	1589.22	12.7561	1589.22	12.7561	97.413
101517AL4-228	1647.37	1.62728e+06	8.84185	12.7237	0.636124	1.87007	1.15123	0.172648	0.959516	0.833472	1026.68	9.10677	1070.56	7.61666	1161.03	12.6252	1161.03	12.6252	88.4289
101517AL4-229	161.31	1.22619e+06	6.62169	5.94363	0.517976	11.0653	1.03559	0.477201	0.896745	0.865925	2515.06	18.6746	2528.64	9.64399	2539.54	8.68615	2539.54	8.68615	99.0361
101517AL4-230	87.7216	82599.6	1.95633	10.669	0.713666	3.32159	1.31991	0.257132	1.11034	0.841221	1475.15	14.6403	1486.14	10.3013	1501.84	13.4907	1501.84	13.4907	98.2231
101517AL4-232	557.121	383533	2.28977	17.2582	0.920169	0.548414	1.81245	0.068674	1.56149	0.861537	428.162	6.46852	443.957	6.51812	526.687	20.1716	428.162	6.46852	81.2935
101517AL4-233	203.335	60802.7	2.45197	12.3813	0.659085	2.06861	1.17537	0.185836	0.973192	0.827988	1098.78	9.83157	1138.47	8.04545	1214.94	12.9835	1214.94	12.9835	90.4389
101517AL4-234	240.278	261360	2.05993	8.21815	0.539586	6.02611	1.52157	0.359334	1.42268	0.935009	1979.02	24.2438	1979.62	13.2516	1980.24	9.60837	1980.24	9.60837	99.9381
101517AL4-236	77.9576	506386	0.777634	5.27724	0.61659	13.2999	1.12397	0.509265	0.939743	0.836096	2653.49	20.4412	2701.18	10.6149	2737.03	10.1437	2737.03	10.1437	96.9477
101517AL4-239	388.368	505827	2.76377	8.24222	0.60926	6.09316	1.008	0.364397	0.803036	0.796662	2002.98	13.8257	1989.27	8.79233	1975.03	10.8557	1975.03	10.8557	101.415
101517AL4-241	373.811	89967.3	2.69739	13.6419	0.589619	1.69694	1.17822	0.167969	1.02007	0.865774	1000.91	9.45682	1007.38	7.52762	1021.46	11.9354	1021.46	11.9354	97.9882
101517AL4-242	655.748	3.75216e+06	2.45237	10.9627	0.608955	3.2808	1.24144	0.260967	1.08182	0.871428	1494.79	14.4331	1476.51	9.66102	1450.31	11.5911	1450.31	11.5911	103.067
101517AL4-243	170.616	24634.6	3.19792	17.4858	1.03672	0.581974	1.78496	0.0738373	1.45303	0.814039	459.233	6.44064	465.729	6.66758	497.862	22.8175	459.233	6.44064	92.241
101517AL4-244	225.401	215102	3.31887	13.4004	0.734983	1.75628	1.4448	0.170766	1.24388	0.860938	1016.33	11.6958	1029.48	9.34802	1057.55	14.7977	1057.55	14.7977	96.1025
101517AL4-245	379.829	37578.4	1.12363	17.9074	0.720299	0.532457	1.25707	0.0691838	1.03024	0.819557	431.236	4.29744	433.439	4.43496	445.138	16.0134	431.236	4.29744	96.8769
101517AL4-248	2653.94	93263.5	6.4832	20.8093	0.941629	0.072228	1.46607	0.0109056	1.1237	0.766469	69.9217	0.781462	70.8115	1.00277	100.973	22.271	69.9217	0.781462	NA
101517AL4-249	605.246	1.00549e+06	3.36244	11.4352	0.641426	2.84968	1.31408	0.236445	1.1469	0.872778	1368.19	14.1384	1368.73	9.87727	1369.55	12.3453	1369.55	12.3453	99.9004
101517AL4-250	584.61	1.61893e+09	3.65449	7.02818	0.512294	6.61516	1.16063	0.337342	1.04145	0.897314	1873.87	16.935	2061.37	10.2376	2254.43	8.84651	2254.43	8.84651	83.1195
101517AL4-252	159.867	143563	2.0612	9.77601	0.602533	4.07333	1.2473	0.288934	1.09211	0.875582	1636.2	15.7818	1648.98	10.1689	1665.28	11.148	1665.28	11.148	98.2536
101517AL4-253	363.394	134980	1.41047	9.28948	0.56545	3.75512	1.02162	0.253106	0.850862	0.832859	1454.47	11.0788	1583.21	8.19199	1759.18	10.3405	1759.18	10.3405	82.6791
101517AL4-254	294.555	132987	3.81987	11.7456	0.78067	2.27166	1.26356	0.1936	0.993546	0.786308	1140.85	10.3885	1203.53	8.90864	1317.83	15.133	1317.83	15.133	86.57
101517AL4-255	425.143	200055	1.78545	7.98373	0.741729	6.74216	1.65861	0.390564	1.48352	0.894434	2125.44	26.8605	2078.16	14.667	2031.62	13.1276	2031.62	13.1276	104.618
101517AL4-256	2079.86	29907.4	1.80813	20.5233	0.897737	0.0928611	1.44726	0.0138283	1.13518	0.784364	88.5324	0.998132	90.1651	1.24866	133.574	21.1102	88.5324	0.998132	NA
101517AL4-257	82.862	35730.6	4.44119	12.7778	0.838047	1.99514	1.41404	0.184978	1.13894	0.805452	1094.11	11.4612	1113.87	9.56447	1152.61	16.6349	1152.61	16.6349	94.9246
101517AL4-258	841.462	98621.1	16.4518	18.3056	0.694764	0.494272	1.38037	0.0656505	1.19278	0.864101	409.898	4.73697	407.817	4.63622	396.033	15.5776	409.898	4.73697	103.501
101517AL4-260	205.725	103439	3.69023	13.6733	0.798092	1.69012	1.16385	0.167679	0.847116	0.727854	999.309	7.8418	1004.81	7.42476	1016.81	16.1665	1016.81	16.1665	98.2791
101517AL4-261	347.334	2.83215e+06	2.72202	9.66546	0.651686	4.11774	1.19462	0.288781	1.00121	0.838099	1635.44	14.4622	1657.83	9.76009	1686.3	12.027	1686.3	12.027	96.9836
101517AL4-262	68.6913	38575.4	2.66253	5.18312	0.73233	13.8475	1.34951	0.520776	1.13352	0.83995	2702.47	25.0228	2739.33	12.7805	2766.61	12.0189	2766.61	12.0189	97.6817
101517AL4-263	1054.74	10825.5	4.15738	21.168	0.973065	0.0764859	1.40895	0.0117476	1.01896	0.723207	75.2885	0.7627	74.8357	1.01648	60.395	23.1901	75.2885	0.7627	NA
101517AL4-264	250.271	118708	2.72572	12.8517	0.637509	2.04324	1.12475	0.190532	0.92663	0.823855	1124.25	9.55984	1130.04	7.6679	1141.16	12.6764	1141.16	12.6764	98.5184
101517AL4-265	223.13	128838	15.6293	9.67273	0.629522	3.89764	1.26932	0.273551	1.10221	0.868349	1558.8	15.2618	1613.19	10.2572	1684.91	11.62	1684.91	11.62	92.5153
101517AL4-266	528.605	26695.8	0.962663	9.20385	1.02775	4.01983	2.35705	0.268451	2.12119	0.899931	1532.93	28.9395	1638.21	19.1677	1776.1	18.7539	1776.1	18.7539	86.3091
101517AL4-267	230.133	173466	1.5945	8.17802	0.60791	5.83077	1.08082	0.345988	0.893649	0.826828	1915.41	14.8083	1950.99	9.36807	1988.95	10.814	1988.95	10.814	96.3026
101517AL4-268	290.969	139041	2.44521	11.8156	0.657149	2.55789	1.34937	0.219294	1.17854	0.873399	1278.14	13.6641	1288.69	9.85063	1306.3	12.7594	1306.3	12.7594	97.8446
101517AL4-269	169.751	61430.5	0.854251	10.0238	0.694718	3.46234	1.30956	0.25182	1.11009	0.847685	1447.85	14.3955	1518.68	10.3175	1618.84	12.9308	1618.84	12.9308	89.438
101517AL4-270	237.151	8588.52	1.63113	20.6025	2.58372	0.080689	3.02883	0.0120621	1.58058	0.521844	77.2918	1.21436	78.7925	2.29625	124.52	60.8258	77.2918	1.21436	NA
101517AL4-271	418.994	614747	2.80929	8.51216	0.50293	5.39738	1.07029	0.333358	0.944765	0.882719	1854.63	15.2267	1884.44	9.16904	1917.43	9.02199	1917.43	9.02199	96.7252
101517AL4-272	122.062	1.17917e+06	1.51349	10.6277	0.580284	3.44907	1.29705	0.265969	1.16	0.89434	1520.31	15.7104	1515.66	10.2102	1509.16	10.9586	1509.16	10.9586	100.739
101517AL4-273	104.279	89430.1	2.60842	8.90918	0.482751	4.8298	1.24569	0.312216	1.14834	0.921854	1751.6	17.6133	1790.1	10.4792	1835.26	8.74596	1835.26	8.74596	95.4418
101517AL4-275	929.404	390513	4.2322	12.7679	0.597545	2.04227	1.3542	0.1892	1.21524	0.897383	1117.04	12.4637	1129.72	9.23084	1154.15	11.8595	1154.15	11.8595	96.7844
101517AL4-276	91.6964	80870.4	3.05972	8.9655	0.751431	4.93432	1.50108	0.320989	1.29946	0.865683	1794.56	20.3552	1808.15	12.674	1823.83	13.6309	1823.83	13.6309	98.3949
101517AL4-277	419.821	46583.2	1.23356	20.5708	3.07026	0.0255066	3.45311	0.00380707	1.58034	0.457656	24.4954	0.386375	25.5742	0.872077	128.188	72.28	24.4954	0.386375	NA
101517AL4-278	581.024	81737.4	1.33945	17.7353	0.830286	0.488523	1.55457	0.0628654	1.31427	0.845425	393.028	5.01114	403.904	5.18052	466.579	18.3969	393.028	5.01114	NA
101517AL4-279	270.75	110233	3.57317	11.6185	0.568074	2.79502	1.12498	0.235625	0.971019	0.863141	1363.91	11.9366	1354.21	8.41311	1338.89	10.9794	1338.89	10.9794	101.869
101517AL4-280	1153.9	41903.7	4.31339	20.9619	0.939614	0.0703964	1.54232	0.010707	1.22306	0.793	68.655	0.835235	69.0756	1.02994	83.6408	22.2718	68.655	0.835235	NA
101517AL4-281	541.708	386183	2.20538	10.2226	0.670057	3.65488	1.28342	0.271094	1.09462	0.852892	1546.35	15.0495	1561.57	10.2324	1582.2	12.5312	1582.2	12.5312	97.7344
101517AL4-282	103.346	444907	1.02199	5.29927	0.526597	13.1473	1.00761	0.505523	0.859049	0.852565	2637.49	18.5948	2690.28	9.50815	2730.18	8.668	2730.18	8.668	96.6049
101517AL4-283	1945.42	21756.1	3.64414	20.9444	1.13798	0.0719716	1.42314	0.0109375	0.854586	0.600495	70.1247	0.596028	70.5687	0.970185	85.6646	26.9823	70.1247	0.596028	NA
101517AL4-284	308.984	50008.7	2.79479	17.1456	0.764887	0.667291	1.24312	0.0830147	0.979949	0.788297	514.092	4.8422	519.064	5.05186	541.018	16.7318	514.092	4.8422	95.0231
101517AL4-285	103.682	92263.8	1.49405	10.0358	0.566642	3.44708	2.24613	0.251009	2.17348	0.967655	1443.68	28.1128	1515.2	17.6801	1616.61	10.5496	1616.61	10.5496	89.3026
101517AL4-286	2821.28	61005.7	2.79906	18.6918	0.646355	0.257147	2.39702	0.0348755	2.30823	0.962959	220.99	5.01453	232.365	4.97853	349.046	14.6094	220.99	5.01453	NA
101517AL4-287	521.992	231479	3.07614	12.2961	0.596047	2.37376	1.44822	0.211783	1.31987	0.911377	1238.31	14.8702	1234.73	10.3467	1228.52	11.7042	1228.52	11.7042	100.797
101517AL4-288	676.737	604156	1.75433	9.74174	0.662102	3.82498	1.273	0.270367	1.08726	0.854097	1542.67	14.9169	1598.02	10.2472	1671.78	12.2402	1671.78	12.2402	92.2768
101517AL4-289	762.896	103125	1.42588	17.3642	0.926889	0.556974	1.21636	0.0701741	0.787666	0.647558	437.205	3.32953	449.555	4.41824	513.238	20.3443	437.205	3.32953	85.1856
101517AL4-290	370.309	214962	1.23167	10.0085	0.666767	3.9464	1.33776	0.286588	1.15975	0.866935	1624.46	16.6533	1623.25	10.8377	1621.67	12.4059	1621.67	12.4059	100.172
101517AL4-291	97.8556	20927.8	2.57858	14.3651	1.0777	1.43496	1.44976	0.149567	0.969726	0.668888	898.538	8.13336	903.621	8.6753	916.087	22.1527	916.087	22.1527	98.0843
101517AL4-293	570.628	297279	1.17917	10.3561	0.75233	3.12244	1.87755	0.234627	1.72023	0.91621	1358.7	21.0741	1438.23	14.4408	1557.89	14.1165	1557.89	14.1165	87.2146
101517AL4-295	158.971	173269	3.0369	3.9023	2.43652	21.3515	2.87005	0.604558	1.51675	0.528474	3048.18	36.8399	3154.69	27.8452	3223.15	38.4643	3223.15	38.4643	94.5713
101517AL4-296	676.571	682461	1.39713	8.32441	0.579398	5.94362	1.20987	0.358998	1.06211	0.877873	1977.42	18.0868	1967.63	10.5159	1957.34	10.3429	1957.34	10.3429	101.026
101517AL4-297	262.551	95743.2	3.42972	9.91623	0.477726	3.89283	1.04636	0.280092	0.930943	0.889693	1591.82	13.1311	1612.2	8.45334	1638.89	8.87006	1638.89	8.87006	97.1281
101517AL4-298	152.807	188224	0.263857	5.55078	0.503697	12.4921	1.20313	0.503128	1.09261	0.908145	2627.22	23.576	2642.14	11.3114	2653.56	8.35437	2653.56	8.35437	99.0075
101517AL4-299	869.017	73997.6	1.39384	17.0223	0.830858	0.619283	1.70279	0.0764883	1.48633	0.872878	475.128	6.808	489.398	6.61248	556.745	18.1207	475.128	6.808	85.3403
101517AL4-300	153.634	306154	1.87928	8.97633	0.617353	5.09434	1.08338	0.331799	0.890269	0.821755	1847.09	14.298	1835.16	9.19565	1821.64	11.2013	1821.64	11.2013	101.397
101517AL4-303	88.4312	472513	0.368041	8.89908	0.771522	4.985	1.21178	0.321883	0.934434	0.771124	1798.92	14.6681	1816.78	10.2487	1837.31	13.9743	1837.31	13.9743	97.9104
101517AL4-304	184.769	117801	2.05695	9.35348	0.529796	4.52764	1.16864	0.307279	1.04164	0.891335	1727.3	15.7835	1736.06	9.71973	1746.62	9.70186	1746.62	9.70186	98.8943
101517AL4-305	49.2773	11738	1.0534	13.4675	1.2851	1.77459	1.68382	0.17341	1.08801	0.646154	1030.87	10.3651	1036.2	10.9356	1047.49	25.9308	1047.49	25.9308	98.4135
101517AL4-306	187.194	99154.1	1.69258	16.8411	0.792307	0.704381	1.06365	0.0860729	0.709649	0.667182	532.27	3.62551	541.404	4.46347	580.056	17.2247	532.27	3.62551	91.7618
101517AL4-307	217.232	92983	3.49441	10.6863	0.652742	3.39758	1.0892	0.263441	0.871945	0.800536	1507.42	11.7202	1503.84	8.54485	1498.78	12.344	1498.78	12.344	100.577
101517AL4-309	58.9285	108939	0.851687	9.78475	0.621683	3.95891	1.26576	0.281069	1.10257	0.871073	1596.74	15.5943	1625.82	10.2609	1663.63	11.5048	1663.63	11.5048	95.9792
101517AL4-310	505.786	1.67712e+06	1.2338	9.96883	0.448422	4.066	1.38034	0.294103	1.30548	0.945761	1662	19.1258	1647.51	11.2496	1629.06	8.33485	1629.06	8.33485	102.022
101517AL4-311	137.262	57364.3	0.924121	8.25891	0.573434	5.65643	1.15417	0.338964	1.00164	0.867845	1881.68	16.3462	1924.74	9.959	1971.43	10.2196	1971.43	10.2196	95.4477
101517AL4-312	441.368	206851	5.65001	9.481	0.552472	4.34637	1.14147	0.298998	0.998859	0.875067	1686.34	14.8212	1702.21	9.42265	1721.78	10.1505	1721.78	10.1505	97.9417
101517AL4-313	300.539	102846	1.60784	9.88338	0.588012	3.5367	1.75237	0.253625	1.65077	0.942021	1457.14	21.5293	1535.46	13.8721	1645.05	10.9091	1645.05	10.9091	88.5775
101517AL4-314	104.259	35816.1	1.99047	9.22646	0.557173	4.71725	0.88743	0.3158	0.690717	0.778334	1769.19	10.6866	1770.31	7.43487	1771.62	10.1716	1771.62	10.1716	99.8626
Notes:
1. Analyses with >10% uncertainty (1-σ) in 206Pb/238U age are not included.
2. Analyses with >10% uncertainty (1-σ) in 206Pb/207Pb age are not included, unless 206Pb/238U age is <500 Ma.
3. Best age is determined from 206Pb/238U age for analyses with 206Pb/238U age <1000 Ma and from 206Pb/207Pb age for analyses with 206Pb/238U age >1000 Ma.
4. Concordance is based on 206Pb/238U age / 206Pb/207Pb age. Value is not reported for 206Pb/238U ages <500 Ma because of large uncertainty in 206Pb/207Pb age.
5. Analyses with 206Pb/238U age >500 Ma and with >20% discordance (<80% concordance) are not included.
6. Analyses with 206Pb/238U age >500 Ma and with >5% reverse discordance (<105% concordance) are not included.
7. All uncertainties are reported at the 1-σ level, and include only measurement errors.
8. Systematic errors are as follows (at 2-σ level): 1.4% (206Pb/238U) and 0.8% (206Pb/207Pb)
9. Analyses conducted by LA-MC-ICPMS, as described by Gehrels et al. (2008).
10. U concentration and U/Th are calibrated relative to Sri Lanka zircon standard and are accurate to ~20%.
11. Common Pb correction is from measured 204Pb with common Pb composition interpreted from Stacey and Kramers (1975).
12. Common Pb composition assigned uncertainties of 1.5 for 206Pb/204Pb, 0.3 for 207Pb/204Pb, and 2.0 for 208Pb/204Pb.
13. U/Pb and 206Pb/207Pb fractionation is calibrated relative to fragmetns of a large Sri Lanka zircon of 563.5 ± 3.2 Ma (2-σ).
14. U decay constants and composition are as follows: 238U = 9.845x10^(-10); 235U = 1.55125x10^(-10); 238U/235U = 137.88
15. Weighted mean and concordia plots determined with Isoplot (Ludwig, 2008).

## Sheet: 101517AL1
U/Pb detrital zircon geochronologic analyses by LA-ICP-MS analysis
	Isotope Ratios										Apparent Ages (Ma)
Analysis	U	206Pb	U/Th	206Pb*	± 1σ	207Pb*	± 1σ	206Pb*	± 1σ	error	206Pb*	± 1σ	207Pb*	± 1σ	206Pb*	± 1σ	Best Age	± 1σ	% conc
	(ppm)	204Pb		207Pb*	(%)	235U	(%)	238U	(%)	corr.	238U	(Ma)	235U	(Ma)	207Pb*	(Ma)	(Ma)	(Ma)
Sample 101517AL1: (Lat/Long: 46.52051, -112.966)--NAD 1983 coordinate system
101517AL1-0	52.7317	24694.4	2.24464	8.80976	0.791094	5.26335	1.23181	0.336445	0.944211	0.766521	1869.54	15.3233	1862.94	10.511	1855.56	14.2952	1855.56	14.2952	100.754
101517AL1-1	1667.1	42142.2	5.68622	20.6474	0.953101	0.0730674	1.21863	0.0109465	0.759382	0.623143	70.1824	0.530061	71.6061	0.842557	119.431	22.4773	70.1824	0.530061	NA
101517AL1-2	229.731	239380	3.14459	10.6927	0.61591	3.46842	1.08622	0.269096	0.894717	0.823702	1536.21	12.2298	1520.06	8.56118	1497.63	11.6493	1497.63	11.6493	102.576
101517AL1-3	273.505	24081.9	2.40856	10.3139	1.09257	3.25003	1.26862	0.24322	0.64475	0.508228	1403.41	8.13132	1469.18	9.8508	1565.54	20.4788	1565.54	20.4788	89.6442
101517AL1-4	463.161	85396.8	1.99474	17.9579	0.800366	0.500079	1.25701	0.0651603	0.969277	0.771095	406.932	3.82238	411.756	4.25498	438.87	17.8333	406.932	3.82238	92.7227
101517AL1-5	567.71	386896	2.85737	9.36546	0.525779	4.73995	0.96894	0.3221	0.813881	0.83997	1799.98	12.7822	1774.33	8.1246	1744.27	9.63109	1744.27	9.63109	103.194
101517AL1-6	143.444	347251	3.90794	12.2156	0.90831	2.37716	1.26347	0.210699	0.878256	0.695113	1232.54	9.85293	1235.76	9.03054	1241.38	17.8005	1241.38	17.8005	99.2876
101517AL1-7	345.71	659849	0.931067	9.92407	0.691675	3.9769	1.2753	0.286366	1.07144	0.840145	1623.35	15.376	1629.49	10.3477	1637.42	12.845	1637.42	12.845	99.1402
101517AL1-8	337.349	642752	0.895447	9.58656	0.487003	4.28763	1.25525	0.298241	1.15693	0.921671	1682.58	17.1332	1690.99	10.3355	1701.41	8.96882	1701.41	8.96882	98.8932
101517AL1-9	446.264	873010	2.95685	13.1629	0.583943	1.9413	1.30126	0.18541	1.16288	0.893656	1096.46	11.7251	1095.45	8.72083	1093.46	11.7057	1093.46	11.7057	100.274
101517AL1-10	2516.54	58768.3	1.93003	16.8536	2.17142	0.0339317	2.3677	0.00414941	0.943896	0.398655	26.6935	0.251438	33.882	0.788988	578.437	47.1678	26.6935	0.251438	NA
101517AL1-11	169.352	111370	4.12886	13.649	0.795542	1.6985	1.27477	0.168211	0.996067	0.78137	1002.25	9.24573	1007.97	8.14731	1020.4	16.1065	1020.4	16.1065	98.2215
101517AL1-13	689.636	539475	3.19339	12.3869	0.63647	2.32021	1.13525	0.208534	0.940057	0.828059	1221.01	10.4566	1218.49	8.05553	1214.05	12.5215	1214.05	12.5215	100.573
101517AL1-15	472.756	19064.8	1.20576	21.5543	1.29164	0.0746475	1.70214	0.0116745	1.10858	0.651287	74.8224	0.824674	73.1001	1.20054	17.1008	31.0175	74.8224	0.824674	NA
101517AL1-16	256.947	103262	1.68556	9.12262	0.451533	5.06496	1.20801	0.335262	1.12045	0.927516	1863.83	18.1355	1830.26	10.2439	1792.26	8.22356	1792.26	8.22356	103.994
101517AL1-18	1409.99	22400.2	2.1274	21.7572	1.59797	0.0256924	1.87486	0.00405598	0.980622	0.523036	26.0936	0.255363	25.7582	0.476857	NA	NA	26.0936	0.255363	NA
101517AL1-19	427.901	379717	601.075	8.89087	0.426076	5.24365	1.15647	0.338272	1.07512	0.929657	1878.35	17.5186	1859.74	9.86222	1838.98	7.71567	1838.98	7.71567	102.141
101517AL1-20	941.081	253446	1.8061	19.5078	0.616787	0.277593	1.1744	0.0392921	0.999399	0.850984	248.444	2.43571	248.746	2.59098	251.624	14.186	248.444	2.43571	NA
101517AL1-21	82.7113	259723	1.22793	8.53766	0.636688	5.71405	1.24462	0.353973	1.06944	0.859252	1953.54	18.0234	1933.5	10.7558	1912.06	11.4288	1912.06	11.4288	102.17
101517AL1-22	457.487	500473	4.32225	9.31544	0.551851	4.72742	1.19361	0.319533	1.05838	0.886704	1787.45	16.5217	1772.11	10.0039	1754.08	10.0982	1754.08	10.0982	101.902
101517AL1-23	72.2276	273247	4.5073	5.18031	0.428797	14.5939	0.843908	0.548547	0.726853	0.861293	2819.13	16.598	2789.13	8.01956	2767.5	7.0367	2767.5	7.0367	101.866
101517AL1-24	89.8778	136451	0.824585	8.3603	0.47099	5.83545	1.07185	0.353984	0.96282	0.898282	1953.6	16.2269	1951.69	9.29141	1949.65	8.41692	1949.65	8.41692	100.202
101517AL1-25	397.338	279488	1.21751	9.99873	0.419328	4.0083	1.09949	0.290799	1.01638	0.924416	1645.52	14.7608	1635.88	8.93513	1623.49	7.79955	1623.49	7.79955	101.357
101517AL1-26	377.836	270591	1.2102	5.44784	0.513	11.6426	1.26414	0.460216	1.15537	0.913958	2440.51	23.474	2576.1	11.8211	2684.56	8.48029	2684.56	8.48029	90.9092
101517AL1-27	975.979	362951	7.67489	5.70545	0.506043	11.0976	1.09185	0.459417	0.967497	0.88611	2436.99	19.6335	2531.36	10.1704	2607.89	8.43001	2607.89	8.43001	93.4468
101517AL1-28	94.7189	50614	1.1903	13.1082	0.727944	2.0221	1.07475	0.192324	0.790687	0.735694	1133.95	8.22173	1122.96	7.30195	1101.77	14.5714	1101.77	14.5714	102.921
101517AL1-29	5484.69	32485.3	0.377834	19.6264	0.721703	0.054822	1.14623	0.00780696	0.890504	0.776895	50.1315	0.444691	54.193	0.604893	237.662	16.6572	50.1315	0.444691	NA
101517AL1-30	119.871	17289.9	1.91159	7.85783	2.13485	5.78549	2.78413	0.329861	1.78713	0.641897	1837.71	28.5759	1944.24	24.1079	2059.7	37.6685	2059.7	37.6685	89.2219
101517AL1-31	216.998	39400.4	3.2609	11.1316	0.812055	2.87645	1.02498	0.232327	0.625417	0.610176	1346.69	7.60085	1375.76	7.72281	1421.16	15.5181	1421.16	15.5181	94.7593
101517AL1-32	736.927	320691	2.07469	12.4458	0.540916	2.29688	1.13543	0.207419	0.998309	0.879231	1215.05	11.0554	1211.33	8.03223	1204.72	10.6695	1204.72	10.6695	100.858
101517AL1-33	701.455	35361.4	1.26218	20.841	1.22204	0.0805071	1.57966	0.0121742	1.00097	0.633664	78.0061	0.776115	78.6215	1.19509	97.343	28.9325	78.0061	0.776115	NA
101517AL1-34	1302.86	32985.8	2.45668	20.7359	0.992399	0.104435	1.34731	0.015713	0.911249	0.676349	100.505	0.908747	100.862	1.29361	109.295	23.4351	100.505	0.908747	NA
101517AL1-35	662.085	8776.98	0.563234	21.9499	2.60556	0.0256599	2.96015	0.00408672	1.40482	0.474578	26.291	0.368589	25.726	0.751961	NA	NA	26.291	0.368589	NA
101517AL1-36	251.262	466298	1.35414	5.69879	0.420051	11.7806	1.04812	0.48712	0.960265	0.91618	2558.2	20.2769	2587.12	9.81002	2609.83	6.99615	2609.83	6.99615	98.0219
101517AL1-37	101.606	127527	1.58958	8.86816	0.586324	5.23329	1.17335	0.336741	1.01636	0.866199	1870.97	16.5049	1858.05	10.003	1843.61	10.6097	1843.61	10.6097	101.484
101517AL1-38	283.312	3902.36	2.26907	8.91897	7.79959	0.0680399	7.90206	0.00440318	1.26842	0.160518	28.3224	0.35846	66.8377	5.11152	1833.27	141.546	28.3224	0.35846	NA
101517AL1-39	1062.03	40057.2	1.08757	18.8713	0.845771	0.187731	1.16569	0.0257055	0.80218	0.688162	163.614	1.29596	174.692	1.87081	327.399	19.1875	163.614	1.29596	NA
101517AL1-40	209.413	242769	1.33778	10.0047	0.467017	4.0732	1.02163	0.295685	0.908638	0.8894	1669.87	13.3672	1648.95	8.32888	1622.37	8.688	1622.37	8.688	102.928
101517AL1-41	209.857	295952	0.982289	10.1716	0.57894	3.56163	1.11065	0.262861	0.947828	0.853397	1504.46	12.718	1541.03	8.80537	1591.54	10.8154	1591.54	10.8154	94.529
101517AL1-42	2099.87	25291.5	1.06593	21.4617	0.985617	0.0255675	1.29614	0.00398144	0.841744	0.649424	25.6151	0.215185	25.6345	0.3281	27.4828	23.6577	25.6151	0.215185	NA
101517AL1-44	567.008	6624.49	0.947204	17.5569	2.03777	0.091341	2.14284	0.0116359	0.662763	0.309292	74.577	0.491421	88.7518	1.82107	488.955	44.9721	74.577	0.491421	NA
101517AL1-46	502.538	2.5362e+06	5.23639	9.41989	0.608719	3.71293	1.94891	0.253776	1.8514	0.949971	1457.92	24.1575	1574.16	15.5912	1733.65	11.1655	1733.65	11.1655	84.0953
101517AL1-47	201.409	22530.4	2.84112	12.137	0.645147	1.96262	1.15428	0.172837	0.957159	0.829224	1027.72	9.09287	1102.78	7.76445	1254.03	12.6324	1254.03	12.6324	81.9536
101517AL1-50	698.468	366728	1.8164	8.18951	0.609307	6.08381	1.24107	0.361511	1.0812	0.871186	1989.33	18.5066	1987.93	10.8231	1986.46	10.842	1986.46	10.842	100.145
101517AL1-51	517.126	1.44179e+07	4.60021	9.30866	0.576002	4.67879	1.09281	0.316016	0.928686	0.849814	1770.24	14.3759	1763.45	9.14249	1755.41	10.5384	1755.41	10.5384	100.845
101517AL1-52	322.544	134417	1.75653	13.3994	0.503735	1.79052	1.20613	0.174081	1.0959	0.908609	1034.56	10.4747	1042.01	7.85823	1057.7	10.1409	1057.7	10.1409	97.8119
101517AL1-53	854.319	19385.4	2.77156	21.3061	1.15524	0.0770554	1.54501	0.0119123	1.0259	0.664011	76.3376	0.77853	75.3727	1.12234	44.8722	27.6291	76.3376	0.77853	NA
101517AL1-55	567.897	343364	1.65439	11.1807	0.487346	3.08337	1.23591	0.250139	1.13577	0.918973	1439.19	14.6498	1428.57	9.47625	1412.75	9.32357	1412.75	9.32357	101.872
101517AL1-57	110.724	46629.6	4.29175	11.6731	0.520843	2.7036	0.936592	0.228991	0.778414	0.831112	1329.21	9.34971	1329.45	6.94234	1329.81	10.0803	1329.81	10.0803	99.9543
101517AL1-58	623.173	270702	1.61208	20.5999	1.18968	0.0702868	1.50834	0.0105057	0.927221	0.614729	67.3711	0.621426	68.9716	1.00578	124.816	28.0363	67.3711	0.621426	NA
101517AL1-59	509.794	18736.6	1.1814	21.5904	1.28621	0.0758343	1.75438	0.0118799	1.19311	0.680076	76.1316	0.902991	74.2209	1.25566	13.0809	30.9271	76.1316	0.902991	NA
101517AL1-60	224.411	380912	2.35537	12.9802	0.547531	2.04534	1.02607	0.192634	0.867771	0.845724	1135.63	9.03545	1130.74	6.9975	1121.36	10.9185	1121.36	10.9185	101.272
101517AL1-61	101.422	204443	1.59655	6.1304	0.470734	10.9629	0.999625	0.487644	0.88185	0.882181	2560.47	18.6345	2519.99	9.30182	2487.53	7.93484	2487.53	7.93484	102.932
101517AL1-62	125.505	94521.5	1.35029	13.3459	0.607294	1.86376	1.63142	0.180478	1.51417	0.928133	1069.58	14.9231	1068.32	10.7811	1065.76	12.2114	1065.76	12.2114	100.359
101517AL1-63	119.169	287275	2.30919	9.21788	0.640232	4.76636	0.962002	0.318791	0.718018	0.746379	1783.82	11.1888	1778.99	8.07421	1773.32	11.6857	1773.32	11.6857	100.592
101517AL1-64	78.9909	130188	1.29272	8.57841	0.661697	5.57253	1.23229	0.346854	1.03957	0.843605	1919.56	17.2583	1911.86	10.6091	1903.51	11.8899	1903.51	11.8899	100.843
101517AL1-65	190.184	413689	0.89248	6.04345	0.610388	11.3188	1.09875	0.496332	0.913608	0.831497	2598.02	19.5355	2549.76	10.2512	2511.57	10.2614	2511.57	10.2614	103.442
101517AL1-66	189.527	110845	1.36097	10.6512	0.677326	3.41619	1.09688	0.264015	0.862769	0.786568	1510.35	11.6169	1508.13	8.61575	1504.99	12.7983	1504.99	12.7983	100.356
101517AL1-67	345.91	192644	1.78878	8.66333	0.605427	5.44811	1.11954	0.342467	0.941717	0.841163	1898.53	15.4865	1892.46	9.60498	1885.79	10.8998	1885.79	10.8998	100.675
101517AL1-68	114.872	398659	2.54966	13.1979	0.63023	1.93925	0.967354	0.185707	0.733883	0.75865	1098.08	7.40961	1094.74	6.48065	1088.09	12.6425	1088.09	12.6425	100.917
101517AL1-70	416.285	170581	2.16622	18.326	0.752456	0.463427	1.14163	0.0616223	0.858568	0.752052	385.484	3.21263	386.638	3.67087	393.533	16.8788	385.484	3.21263	NA
101517AL1-71	78.4646	233170	1.53276	3.73238	0.536107	25.4564	1.02536	0.689399	0.874045	0.852427	3380.32	22.9928	3325.89	10.0181	3293.23	8.4171	3293.23	8.4171	102.645
101517AL1-72	196.948	154773	1.73182	9.89666	0.411546	4.14684	0.8765	0.297779	0.773874	0.882914	1680.29	11.4468	1663.59	7.17077	1642.56	7.63766	1642.56	7.63766	102.297
101517AL1-73	1766.99	519553	1.45338	5.37661	0.595933	10.6446	1.2649	0.415264	1.11573	0.882064	2238.94	21.104	2492.6	11.7412	2706.3	9.8352	2706.3	9.8352	82.7308
101517AL1-74	210.574	859803	1.59199	8.12881	0.594188	6.17015	1.10439	0.363924	0.930922	0.842929	2000.75	16.0123	2000.23	9.65012	1999.68	10.5547	1999.68	10.5547	100.053
101517AL1-75	1208.03	1.09913e+06	2.04351	12.6421	5.15553	0.495078	5.6139	0.0454129	2.22179	0.395766	286.298	6.22176	408.365	18.8779	1173.82	102.069	286.298	6.22176	NA
101517AL1-76	266.684	31505.9	2.27997	19.5597	1.15357	0.316791	1.36939	0.0449598	0.737912	0.538861	283.503	2.04667	279.431	3.34515	245.467	26.5536	283.503	2.04667	NA
101517AL1-78	247.553	344068	2.21888	9.89466	0.656083	3.93036	1.11471	0.282177	0.901184	0.808447	1602.31	12.7851	1619.95	9.02312	1642.93	12.1754	1642.93	12.1754	97.5278
101517AL1-79	611.468	3.4498e+06	2.72633	15.9706	1.7694	0.860159	2.00181	0.0996755	0.936204	0.467678	612.507	5.47032	630.21	9.39927	694.242	37.7242	612.507	5.47032	88.2267
101517AL1-80	1313.91	2.77428e+06	2.22573	8.86261	0.400927	4.60322	0.976649	0.296014	0.890562	0.911855	1671.51	13.1125	1749.85	8.14708	1844.74	7.25515	1844.74	7.25515	90.6093
101517AL1-81	217.433	1.6748e+06	1.23354	7.78242	0.421813	6.76678	0.931313	0.382107	0.830312	0.89155	2086.12	14.798	2081.39	8.23904	2076.7	7.42619	2076.7	7.42619	100.454
101517AL1-83	173.148	618058	1.5148	10.0968	0.672555	3.32399	1.02413	0.243517	0.772336	0.754142	1404.96	9.74996	1486.7	7.99406	1605.32	12.5418	1605.32	12.5418	87.5187
101517AL1-85	326.09	27724.8	1.66819	20.1865	1.07644	0.174756	1.44989	0.0255966	0.971312	0.669923	162.93	1.56272	163.538	2.19003	172.339	25.1067	162.93	1.56272	NA
101517AL1-86	112.938	194584	1.23653	8.60103	0.815136	5.47023	1.50177	0.341384	1.26129	0.839872	1893.33	20.6932	1895.93	12.8927	1898.78	14.6534	1898.78	14.6534	99.713
101517AL1-87	262.312	479511	2.78285	11.3717	0.638164	2.99039	1.28397	0.246739	1.11415	0.867738	1421.64	14.2143	1405.18	9.77039	1380.28	12.2631	1380.28	12.2631	102.997
101517AL1-88	1216.66	431753	2.30154	11.5804	0.601105	2.67929	1.04097	0.225128	0.849875	0.816427	1308.92	10.0675	1322.76	7.69717	1345.24	11.6077	1345.24	11.6077	97.3001
101517AL1-89	753.346	32788	2.39524	20.6475	1.05821	0.102449	1.69317	0.0153485	1.32175	0.780635	98.191	1.28801	99.0349	1.59765	119.42	24.9275	98.191	1.28801	NA
101517AL1-90	455.748	162966	2.36881	8.44265	0.493401	5.95685	1.13237	0.364908	1.01922	0.90008	2005.4	17.5658	1969.57	9.84545	1932.12	8.83374	1932.12	8.83374	103.793
101517AL1-91	193.727	50902.3	1.46422	16.5015	0.896229	0.852042	1.26993	0.102017	0.899719	0.708479	626.219	5.3692	625.769	5.93232	624.122	19.3475	626.219	5.3692	100.336
101517AL1-92	587.087	801193	1.86238	14.2273	0.444904	1.47889	1.04851	0.152668	0.949435	0.905511	915.903	8.1064	921.777	6.35164	935.843	9.11079	935.843	9.11079	97.8693
101517AL1-93	334.684	472158	2.10448	10.7137	0.503038	3.3654	1.25203	0.261616	1.14653	0.915737	1498.11	15.3264	1496.38	9.80098	1493.92	9.51909	1493.92	9.51909	100.28
101517AL1-94	643.569	12747.2	1.65507	21.0993	1.42028	0.0751233	1.79412	0.0115009	1.09621	0.610999	73.7164	0.803482	73.5496	1.27291	68.1475	33.802	73.7164	0.803482	NA
101517AL1-95	80.3209	77303.5	2.40279	10.882	0.71562	3.20405	1.35342	0.252985	1.14875	0.848778	1453.85	14.9518	1458.14	10.4739	1464.38	13.5957	1464.38	13.5957	99.2812
101517AL1-96	81.8423	103895	2.4469	17.9382	1.3182	0.56467	1.5867	0.0734956	0.883158	0.556601	457.181	3.89778	454.562	5.81434	441.315	29.3451	457.181	3.89778	103.595
101517AL1-97	1357.94	405562	2.20303	20.6372	0.786842	0.0947542	1.16348	0.0141885	0.857071	0.736643	90.8224	0.772954	91.9225	1.02252	120.565	18.5517	90.8224	0.772954	NA
101517AL1-98	112.83	120147	1.37851	8.81846	0.578279	5.23025	1.12897	0.334659	0.969618	0.858855	1860.92	15.673	1857.56	9.62368	1853.78	10.4513	1853.78	10.4513	100.386
101517AL1-101	357.097	123048	1.14631	5.31815	0.473831	10.4848	1.44738	0.404583	1.36762	0.944895	2190.11	25.3949	2478.57	13.4176	2724.32	7.80671	2724.32	7.80671	80.3909
101517AL1-102	1051.27	1.1382e+06	6.28308	9.11936	0.759606	4.54403	1.18169	0.300672	0.905195	0.766021	1694.64	13.4892	1739.07	9.8347	1792.91	13.8315	1792.91	13.8315	94.5192
101517AL1-103	2128.78	155651	2.12316	20.2997	0.606619	0.177833	0.944062	0.0261932	0.723372	0.766233	166.679	1.19025	166.194	1.4473	159.292	14.193	166.679	1.19025	NA
101517AL1-104	59.4165	123589	2.06027	12.9848	0.907582	1.94878	1.23708	0.183605	0.840632	0.679529	1086.64	8.40625	1098.03	8.30153	1120.65	18.1017	1120.65	18.1017	96.9652
101517AL1-105	251.769	1.15677e+06	1.57746	8.84225	0.528892	5.21402	1.03784	0.334521	0.892964	0.860406	1860.26	14.4295	1854.91	8.84243	1848.91	9.56414	1848.91	9.56414	100.614
101517AL1-106	268.944	120573	3.20609	12.7807	0.604477	2.10757	1.12954	0.195445	0.95419	0.844756	1150.81	10.0565	1151.28	7.77862	1152.17	11.9825	1152.17	11.9825	99.882
101517AL1-107	501.998	36196.1	2.04865	19.5483	0.823429	0.249741	1.85798	0.0354232	1.66555	0.89643	224.401	3.67321	226.366	3.77002	246.842	18.9682	224.401	3.67321	NA
101517AL1-108	460.186	159899	1.65323	12.2517	0.595877	2.12233	1.39077	0.188667	1.25665	0.903565	1114.15	12.8579	1156.09	9.59912	1235.61	11.6871	1235.61	11.6871	90.17
101517AL1-109	872.561	24562.1	0.849089	15.2984	1.02528	0.556284	4.76853	0.0617491	4.657	0.976612	386.254	17.4596	449.105	17.3087	785.214	21.5336	386.254	17.4596	NA
101517AL1-110	562.758	238182	2.21925	9.31511	0.645834	4.57105	1.23093	0.308952	1.0479	0.851304	1735.55	15.9443	1744	10.2555	1754.14	11.8179	1754.14	11.8179	98.9402
101517AL1-111	1032.55	42437.8	3.16922	15.5464	3.71678	0.178552	4.46219	0.020141	2.46914	0.553347	128.547	3.14256	166.814	6.86436	751.355	78.5135	128.547	3.14256	NA
101517AL1-112	675.729	5.26913e+06	1.61259	9.97992	0.508058	4.01474	1.08381	0.290719	0.957355	0.883321	1645.12	13.9006	1637.19	8.81058	1626.99	9.44604	1626.99	9.44604	101.114
101517AL1-114	538.776	1.32024e+06	1.92586	8.09971	0.640353	5.98252	1.49922	0.351594	1.35558	0.904193	1942.21	22.7322	1973.31	13.0434	2006.05	11.3666	2006.05	11.3666	96.8174
101517AL1-115	293.132	5660.01	1.11425	15.4671	1.81376	0.105286	1.97026	0.0118159	0.76954	0.390578	75.7239	0.579316	101.644	1.90568	762.135	38.2379	75.7239	0.579316	NA
101517AL1-117	136.441	147805	1.09828	7.96699	0.617972	6.66499	1.17744	0.385285	1.00223	0.851197	2100.92	17.9692	2067.99	10.3961	2035.33	10.9322	2035.33	10.9322	103.223
101517AL1-118	277.122	2194.14	2.03663	24.5037	2.53622	0.0233395	2.7924	0.00414965	1.16838	0.418414	26.695	0.311254	23.4262	0.646665	NA	NA	26.695	0.311254	NA
101517AL1-119	232.199	61315.5	6.91599	14.64	0.620247	1.41294	1.16149	0.15009	0.98202	0.84548	901.47	8.26152	894.398	6.90608	876.978	12.8385	901.47	8.26152	102.793
101517AL1-120	229.414	621856	0.528632	9.77153	0.663189	4.06752	1.11941	0.28839	0.901803	0.805609	1633.48	13.0126	1647.82	9.12354	1666.13	12.2691	1666.13	12.2691	98.0401
101517AL1-121	134.68	61877.9	1.13008	20.9164	1.6246	0.174838	1.88642	0.0265344	0.958784	0.508256	168.822	1.59763	163.609	2.85053	88.8339	38.5209	168.822	1.59763	NA
101517AL1-122	57.6048	74954.2	0.712299	8.74021	0.644445	5.20812	1.06806	0.330287	0.851724	0.797453	1839.77	13.6321	1853.95	9.09822	1869.87	11.6266	1869.87	11.6266	98.3904
101517AL1-123	95.7481	90478.6	1.82777	13.3301	0.727043	1.93648	1.3253	0.187298	1.10807	0.836093	1106.72	11.2684	1093.78	8.87443	1068.13	14.6139	1068.13	14.6139	103.613
101517AL1-124	363.612	750580	2.19263	12.5807	0.588991	2.24796	1.0561	0.205203	0.876604	0.830039	1203.21	9.62154	1196.15	7.42198	1183.44	11.6389	1183.44	11.6389	101.671
101517AL1-125	275.965	5296.44	0.854887	21.7409	2.96827	0.0254894	3.24527	0.00402092	1.31194	0.404262	25.8686	0.3387	25.5572	0.819049	NA	NA	25.8686	0.3387	NA
101517AL1-126	47.9423	52809.7	1.35272	5.2983	0.607289	13.7057	1.04103	0.526898	0.845547	0.812219	2728.37	18.8093	2729.59	9.85198	2730.48	9.99654	2730.48	9.99654	99.9225
101517AL1-127	7220.33	460880	5.70544	20.8851	0.598759	0.0797201	1.08104	0.0120807	0.90007	0.8326	77.4104	0.692581	77.8817	0.810451	92.3683	14.2073	77.4104	0.692581	NA
101517AL1-128	333.701	70835.5	1.05605	18.042	0.893917	0.536475	1.32284	0.0702298	0.975097	0.737125	437.54	4.12487	436.098	4.6899	428.468	19.9306	437.54	4.12487	102.117
101517AL1-129	424.159	341170	1.79898	9.14049	0.533597	4.94513	1.09693	0.32797	0.958402	0.873711	1828.54	15.2585	1809.99	9.26484	1788.69	9.72063	1788.69	9.72063	102.228
101517AL1-130	135.07	5.65867e+06	1.11142	8.85033	0.543255	5.2304	0.871377	0.335878	0.681303	0.781868	1866.81	11.0427	1857.58	7.42785	1847.25	9.82587	1847.25	9.82587	101.059
101517AL1-131	196.503	163473	2.20506	8.15837	0.608164	6.02582	0.971056	0.356704	0.757025	0.779589	1966.53	12.8307	1979.58	8.45675	1993.23	10.8111	1993.23	10.8111	98.6604
101517AL1-132	256.475	82174	3.11353	13.1233	0.46935	1.94411	0.89531	0.185119	0.762424	0.851575	1094.88	7.67722	1096.42	6.0031	1099.49	9.39042	1099.49	9.39042	99.5807
101517AL1-133	127.74	130424	2.45331	8.82934	0.624577	5.22272	1.02108	0.33459	0.80778	0.791103	1860.59	13.055	1856.33	8.70196	1851.55	11.2912	1851.55	11.2912	100.488
101517AL1-134	799.782	491891	1.44485	17.9467	0.55204	0.522613	0.867575	0.0680537	0.669281	0.77144	424.419	2.74907	426.895	3.02363	440.264	12.2825	424.419	2.74907	96.4011
101517AL1-135	758.833	705999	5.62581	15.0047	1.01276	0.324053	3.13746	0.0352803	2.96951	0.946468	223.511	6.52344	285.016	7.79701	825.794	21.1341	223.511	6.52344	NA
101517AL1-136	174.195	318994	1.85794	10.6724	0.446518	3.38123	1.12147	0.261834	1.02875	0.917319	1499.22	13.761	1500.06	8.78835	1501.22	8.44131	1501.22	8.44131	99.8663
101517AL1-137	240.922	203647	1.84033	9.82751	0.516228	4.22553	0.894448	0.301309	0.730442	0.81664	1697.8	10.9027	1678.99	7.34418	1655.56	9.56274	1655.56	9.56274	102.551
101517AL1-138	379.282	75494.6	2.44264	17.8749	0.627182	0.536787	1.03862	0.06962	0.827874	0.79709	433.866	3.47366	436.304	3.68364	449.168	13.9536	433.866	3.47366	96.5932
101517AL1-139	1364.82	3.10624e+06	2.59201	12.4779	0.630718	2.14225	1.2265	0.193955	1.0519	0.857645	1142.76	11.0156	1162.55	8.49059	1199.63	12.416	1199.63	12.416	95.26
101517AL1-140	132.203	1342.7	2.20945	29.3498	6.89117	0.019879	7.13452	0.00423339	1.84747	0.258948	27.2326	0.502051	19.9868	1.41202	NA	NA	27.2326	0.502051	NA
101517AL1-141	53.8983	51312.4	1.67716	13.9895	1.04244	1.61698	1.4599	0.164133	1.02207	0.700097	979.703	9.28953	976.82	9.15946	970.324	21.2587	970.324	21.2587	100.967
101517AL1-142	550.975	1.26055e+06	2.89068	10.4131	0.482704	3.61155	1.04053	0.272874	0.921791	0.885886	1555.37	12.7388	1552.08	8.27447	1547.58	9.06956	1547.58	9.06956	100.503
101517AL1-143	43.5007	59112.2	2.08086	13.5441	0.905122	1.68295	1.40596	0.165391	1.07586	0.765213	986.664	9.84265	1002.1	8.95513	1036	18.2999	1036	18.2999	95.2376
101517AL1-144	266.077	85357.2	3.44315	11.6802	0.662772	2.46914	1.39506	0.209259	1.22756	0.879939	1224.87	13.6939	1263.04	10.0823	1328.64	12.8285	1328.64	12.8285	92.1896
101517AL1-145	123.227	111760	3.17148	14.0675	0.676455	1.56939	1.09003	0.16019	0.854733	0.784139	957.832	7.60772	958.184	6.76043	959.01	13.8266	959.01	13.8266	99.8771
101517AL1-146	116.999	128028	0.947721	5.84417	0.556608	11.4827	1.05013	0.486916	0.890488	0.847976	2557.32	18.7981	2563.17	9.80897	2567.8	9.30839	2567.8	9.30839	99.5919
101517AL1-149	463.385	9217.73	1.75208	21.9252	3.32281	0.0251561	3.58391	0.00400198	1.34287	0.374695	25.7469	0.34506	25.2271	0.892978	NA	NA	25.7469	0.34506	NA
101517AL1-150	653.438	375901	3.27408	8.61448	0.462583	5.33441	1.19394	0.333429	1.10068	0.921894	1854.98	17.7425	1874.39	10.2096	1895.97	8.31758	1895.97	8.31758	97.8383
101517AL1-151	222.382	12317.8	1.52084	18.9874	3.67493	0.0397822	4.74254	0.00548077	2.99777	0.632102	35.2348	1.05338	39.6114	1.84242	313.474	83.6349	35.2348	1.05338	NA
101517AL1-152	470.158	48490.2	2.18588	11.731	1.40252	0.582787	2.27327	0.0496057	1.78905	0.786994	312.1	5.45061	466.251	8.4992	1320.24	27.1795	312.1	5.45061	NA
101517AL1-154	253.868	1.44394e+06	3.23803	12.7347	0.50332	2.10742	0.958761	0.194728	0.816022	0.851121	1146.93	8.57391	1151.23	6.60234	1159.32	9.99951	1159.32	9.99951	98.9314
101517AL1-156	371.083	209486	2.01684	9.01106	0.455592	5.05204	1.22166	0.330316	1.13352	0.927859	1839.92	18.1437	1828.09	10.3552	1814.63	8.27283	1814.63	8.27283	101.393
101517AL1-157	581.462	278520	1.15655	10.0018	0.563871	4.06248	1.16399	0.29482	1.01829	0.87483	1665.57	14.9465	1646.81	9.4846	1622.92	10.4894	1622.92	10.4894	102.628
101517AL1-158	101.982	7936.17	1.64165	14.224	5.40858	0.125582	5.5852	0.0129609	1.39345	0.24949	83.0148	1.14935	120.12	6.32737	936.318	110.994	83.0148	1.14935	NA
101517AL1-159	303.32	192607	5.15275	9.51791	0.485881	4.50918	0.847522	0.311406	0.694416	0.819348	1747.62	10.6299	1732.67	7.04367	1714.64	8.93503	1714.64	8.93503	101.924
101517AL1-160	248.453	154040	1.96896	9.94913	0.419532	4.12831	0.93665	0.29802	0.83744	0.89408	1681.48	12.3947	1659.92	7.6562	1632.74	7.79571	1632.74	7.79571	102.985
101517AL1-161	165.72	579607	2.88966	10.7187	0.671597	3.26799	1.16702	0.254163	0.954403	0.817815	1459.91	12.4683	1473.46	9.07352	1493.03	12.7103	1493.03	12.7103	97.7813
101517AL1-163	737.667	742911	1.98781	8.47515	0.605229	5.09202	1.22679	0.313131	1.06711	0.869835	1756.09	16.4038	1834.78	10.4123	1925.24	10.8452	1925.24	10.8452	91.2142
101517AL1-165	399.417	148466	1.1275	9.98336	0.547566	4.11437	1.16969	0.298035	1.03361	0.88366	1681.56	15.2987	1657.16	9.55486	1626.35	10.1816	1626.35	10.1816	103.394
101517AL1-166	123.074	155383	2.03407	11.4208	0.51355	2.90569	1.23437	0.240787	1.12247	0.909346	1390.79	14.042	1383.39	9.3248	1371.98	9.87967	1371.98	9.87967	101.371
101517AL1-168	29.3662	111660	0.643289	8.44977	0.818341	5.78735	1.37481	0.354823	1.10472	0.803547	1957.59	18.651	1944.52	11.9034	1930.61	14.6554	1930.61	14.6554	101.397
101517AL1-169	1862.56	927181	0.638094	20.2294	0.636252	0.178844	0.992797	0.026251	0.762121	0.767651	167.042	1.25671	167.066	1.52936	167.385	14.859	167.042	1.25671	NA
101517AL1-171	432.584	2.94111e+07	3.68758	9.42441	0.582909	4.60084	1.21608	0.314615	1.06728	0.877633	1763.38	16.4655	1749.42	10.1436	1732.77	10.6931	1732.77	10.6931	101.766
101517AL1-172	345.293	23691.6	1.11757	18.0036	3.00271	0.0954392	3.15835	0.0124674	0.979236	0.310047	79.8729	0.777319	92.5576	2.79402	433.21	66.9047	79.8729	0.777319	NA
101517AL1-173	243.082	9055.7	2.01182	12.042	6.17448	0.0465971	6.29007	0.00407141	1.20035	0.190832	26.1927	0.313765	46.2446	2.84358	1269.39	120.627	26.1927	0.313765	NA
101517AL1-174	195.891	246523	5.21154	4.44955	0.617052	14.8403	1.60691	0.479121	1.48371	0.923333	2523.44	30.9822	2805.05	15.2874	3014.27	9.90864	3014.27	9.90864	83.7164
101517AL1-175	562.731	113700	1.15612	9.9249	0.58983	3.92567	1.03686	0.282701	0.852754	0.822435	1604.95	12.1156	1618.99	8.39094	1637.27	10.9538	1637.27	10.9538	98.0261
101517AL1-176	1227.02	621210	1.52987	9.06894	0.508453	4.05685	1.15088	0.266952	1.03248	0.897117	1525.31	14.024	1645.68	9.37525	1803	9.24796	1803	9.24796	84.5988
101517AL1-177	355.934	10378.8	1.77245	14.0454	3.90478	0.039567	4.07883	0.00403232	1.17878	0.289	25.9417	0.305181	39.4012	1.57633	962.227	79.7947	25.9417	0.305181	NA
101517AL1-178	793.106	22085.3	1.09878	19.1667	2.12904	0.0294496	2.42231	0.00409558	1.15533	0.476953	26.3479	0.303783	29.4708	0.703614	292.03	48.6416	26.3479	0.303783	NA
101517AL1-179	135.144	146926	3.13908	7.83184	0.690925	6.76398	1.30254	0.384374	1.10419	0.84772	2096.68	19.7635	2081.02	11.5228	2065.55	12.1808	2065.55	12.1808	101.507
101517AL1-180	77.6667	130334	0.785126	13.0869	0.678336	1.98472	0.960053	0.188462	0.679384	0.707653	1113.04	6.94499	1110.33	6.48226	1105.03	13.5602	1105.03	13.5602	100.725
101517AL1-181	884.056	7843.07	0.856433	21.5892	1.64589	0.0253354	1.9099	0.00396874	0.968905	0.507305	25.5335	0.246906	25.4046	0.479185	13.2235	39.5759	25.5335	0.246906	NA
101517AL1-182	75.0409	154760	0.870774	8.82534	0.602527	5.47625	0.988204	0.350673	0.783268	0.792618	1937.81	13.1094	1896.88	8.48489	1852.37	10.8914	1852.37	10.8914	104.613
101517AL1-184	411.477	4119.91	1.52586	20.3433	2.54918	0.0273785	2.90522	0.00404127	1.39356	0.479674	25.9992	0.361585	27.4259	0.786119	154.252	59.6958	25.9992	0.361585	NA
101517AL1-185	158.265	2.24072e+06	2.59749	8.10451	0.571756	6.09171	0.8749	0.358223	0.662227	0.756917	1973.75	11.2592	1989.06	7.63106	2005	10.1499	2005	10.1499	98.4414
101517AL1-186	304.337	153205	1.40898	10.0555	0.477622	3.69793	1.13304	0.269806	1.02745	0.906809	1539.82	14.0732	1570.92	9.05602	1612.95	8.89613	1612.95	8.89613	95.466
101517AL1-188	408.431	6303.52	1.793	19.3879	3.18043	0.0305598	3.39296	0.00429902	1.18197	0.348359	27.6539	0.32616	30.5652	1.02161	265.769	72.9971	27.6539	0.32616	NA
101517AL1-189	1007.43	617165	2.6661	10.7204	0.610137	3.19279	1.15615	0.248354	0.982045	0.849411	1429.98	12.5946	1455.42	8.93968	1492.73	11.5476	1492.73	11.5476	95.7964
101517AL1-191	138.999	33425.9	1.1829	5.12847	0.668101	13.2963	1.59865	0.494773	1.45235	0.908486	2591.29	30.9902	2700.92	15.0981	2783.99	10.944	2783.99	10.944	93.0785
101517AL1-193	100.192	122046	3.89328	8.83567	0.55949	5.39	1.18998	0.345554	1.05025	0.882577	1913.33	17.387	1883.27	10.1923	1850.25	10.1159	1850.25	10.1159	103.409
101517AL1-194	620.696	29029.4	1.37337	21.7964	1.93368	0.0284603	2.24545	0.00450103	1.14147	0.508346	28.9504	0.329718	28.4945	0.630936	NA	NA	28.9504	0.329718	NA
101517AL1-195	468.184	216380	1.07169	9.49623	0.574132	4.48367	1.27143	0.308939	1.13442	0.892239	1735.48	17.2602	1727.95	10.556	1718.83	10.5523	1718.83	10.5523	100.969
101517AL1-196	707.068	110564	1.1852	19.9288	0.62305	0.181035	1.08027	0.0261776	0.88249	0.816917	166.581	1.45123	168.95	1.68136	202.258	14.4656	166.581	1.45123	NA
101517AL1-199	528.708	33311.4	1.12004	18.2843	0.838247	0.462767	1.33742	0.0613943	1.04213	0.77921	384.1	3.88592	386.181	4.29624	398.646	18.7869	384.1	3.88592	NA
101517AL1-200	283.452	234209	1.40421	8.86984	0.536438	5.15131	1.18027	0.331529	1.05132	0.890745	1845.79	16.8743	1844.61	10.0364	1843.27	9.70913	1843.27	9.70913	100.137
101517AL1-201	121.982	41554.4	3.00262	12.6732	0.570179	2.20448	0.958427	0.202712	0.770375	0.803791	1189.88	8.37027	1182.46	6.69489	1168.95	11.3095	1168.95	11.3095	101.79
101517AL1-202	344.446	186194	2.65067	9.26972	0.454447	4.81096	0.927271	0.323583	0.808276	0.871672	1807.2	12.7383	1786.82	7.79523	1763.07	8.30649	1763.07	8.30649	102.503
101517AL1-203	632.77	311039	1.71331	13.393	3.85203	0.0402732	4.11738	0.00391365	1.45419	0.353183	25.1797	0.365447	40.0907	1.61853	1058.66	77.5595	25.1797	0.365447	NA
101517AL1-204	304.997	191543	3.55071	20.4206	1.06087	0.174602	1.49592	0.0258706	1.05468	0.705036	164.652	1.71456	163.405	2.25787	145.402	24.8761	164.652	1.71456	NA
101517AL1-205	132.971	128633	1.6795	5.8443	0.529621	11.6966	0.972701	0.495998	0.815873	0.838771	2596.57	17.4378	2580.43	9.09899	2567.76	8.8571	2567.76	8.8571	101.122
101517AL1-206	201.9	1739.44	1.85092	20.2904	9.37865	0.0297661	9.45969	0.00438228	1.23553	0.13061	28.1883	0.347516	29.7829	2.77645	160.363	219.777	28.1883	0.347516	NA
101517AL1-208	629.631	885854	3.39275	11.6988	0.706766	2.69348	1.33807	0.228634	1.13618	0.849121	1327.34	13.6296	1326.67	9.9083	1325.57	13.6868	1325.57	13.6868	100.133
101517AL1-209	216.164	10455.6	1.82677	21.7296	3.93505	0.0272426	4.18127	0.00429524	1.41367	0.338097	27.6296	0.389757	27.2916	1.12594	NA	NA	27.6296	0.389757	NA
101517AL1-210	560.17	158231	2.18786	13.3032	0.593959	1.84599	1.33464	0.178186	1.19519	0.895514	1057.06	11.6523	1062	8.79023	1072.2	11.9173	1072.2	11.9173	98.5879
101517AL1-211	242.862	18304.5	2.22473	14.014	6.40235	0.0410724	6.54279	0.00417639	1.34833	0.206079	26.8667	0.361497	40.8705	2.62097	966.751	130.825	26.8667	0.361497	NA
101517AL1-212	1512.08	85146.9	9.69733	19.5458	0.630451	0.255701	1.1042	0.0362637	0.906528	0.820981	229.632	2.04504	231.196	2.2831	247.141	14.5208	229.632	2.04504	NA
101517AL1-213	642.456	64849.4	2.63866	18.1388	1.79941	0.117418	2.15506	0.0154536	1.18592	0.550297	98.8584	1.16344	112.728	2.29936	416.527	40.2249	98.8584	1.16344	NA
101517AL1-214	298.633	443570	1.58838	9.40828	0.535674	4.13387	1.03984	0.282199	0.891245	0.857099	1602.43	12.6449	1661.03	8.50194	1735.91	9.82261	1735.91	9.82261	92.3104
101517AL1-215	165.426	141518	2.27743	10.7189	0.520908	3.3099	0.895945	0.257426	0.728953	0.813613	1476.66	9.62028	1483.39	6.9866	1493.01	9.85847	1493.01	9.85847	98.905
101517AL1-216	193.467	985942	1.92689	13.7127	0.750815	1.7143	1.23169	0.170568	0.976388	0.792723	1015.24	9.17152	1013.9	7.89894	1010.98	15.2224	1010.98	15.2224	100.422
101517AL1-217	347.531	180271	1.97542	6.1396	0.475262	9.52283	1.5108	0.424223	1.4341	0.949232	2279.62	27.537	2389.75	13.8835	2485	8.01321	2485	8.01321	91.7352
101517AL1-218	602.897	22677.4	1.27139	20.5614	0.840585	0.160953	1.32427	0.0240125	1.02328	0.772715	152.965	1.54685	151.537	1.86419	129.226	19.7898	152.965	1.54685	NA
101517AL1-219	469.603	32933.2	1.68324	20.1086	1.44942	0.0821347	1.82112	0.0119838	1.10258	0.605439	76.7935	0.841685	80.15	1.40351	181.36	33.7877	76.7935	0.841685	NA
101517AL1-220	424.17	1.58853e+06	3.05275	10.6891	0.549581	3.31852	1.10114	0.25738	0.954181	0.866542	1476.42	12.5909	1485.42	8.59193	1498.26	10.3938	1498.26	10.3938	98.5424
101517AL1-221	186.208	18227.6	2.97458	20.411	3.65205	0.0290072	3.93581	0.00429594	1.46735	0.372821	27.6341	0.404621	29.0344	1.12655	146.508	85.6858	27.6341	0.404621	NA
101517AL1-222	267.804	42717.8	0.948098	21.8608	3.28004	0.0262245	3.46537	0.00415969	1.1181	0.32265	26.7595	0.298579	26.2848	0.899178	NA	NA	26.7595	0.298579	NA
101517AL1-223	72.4548	86409.3	6.0843	9.96371	0.753026	3.73861	1.37757	0.270283	1.15353	0.837371	1542.24	15.8222	1579.67	11.0362	1630.02	13.9961	1630.02	13.9961	94.6149
101517AL1-226	293.131	1.16379e+06	2.03042	19.6981	1.28141	0.184155	1.53438	0.0263205	0.843997	0.550056	167.478	1.39531	171.629	2.42292	229.21	29.6012	167.478	1.39531	NA
101517AL1-229	76.3273	2.69532e+06	2.24025	12.2249	0.595279	2.43565	1.06897	0.216047	0.887882	0.830598	1260.95	10.1688	1253.19	7.695	1239.88	11.6497	1239.88	11.6497	101.7
101517AL1-230	590.876	4590.09	1.11595	21.8796	2.15291	0.0253357	2.37319	0.00402216	0.998501	0.420742	25.8765	0.257859	25.405	0.595428	NA	NA	25.8765	0.257859	NA
101517AL1-231	565.647	19546.6	1.33732	20.2264	1.18334	0.0819928	1.4914	0.0120332	0.907731	0.608645	77.1082	0.695765	80.0167	1.14756	167.725	27.6436	77.1082	0.695765	NA
101517AL1-233	352.913	64069.8	0.879276	20.4106	1.83778	0.0803986	2.09621	0.0119067	1.00829	0.481006	76.3021	0.764811	78.5196	1.58391	146.557	43.1163	76.3021	0.764811	NA
101517AL1-234	49.0059	38663.1	0.346308	8.19032	0.714548	6.22564	1.08307	0.369976	0.813914	0.75149	2029.29	14.1696	2008.06	9.47558	1986.28	12.715	1986.28	12.715	102.165
101517AL1-236	1510.57	318171	1.34644	19.9523	0.486651	0.17852	0.797783	0.0258444	0.632162	0.792398	164.487	1.02667	166.786	1.22706	199.534	11.3217	164.487	1.02667	NA
101517AL1-237	313.275	119561	1.42166	11.6979	0.605164	2.58183	1.30143	0.219141	1.15217	0.885311	1277.34	13.3508	1295.5	9.52547	1325.71	11.7182	1325.71	11.7182	96.3514
101517AL1-238	281.601	169701	2.31741	5.9922	0.58172	10.2658	1.21078	0.44634	1.06188	0.877022	2378.96	21.1247	2459.02	11.2032	2525.88	9.76843	2525.88	9.76843	94.1833
101517AL1-240	483.058	2.61931e+06	6.3913	9.00846	0.539488	4.693	1.28226	0.306753	1.16325	0.907185	1724.71	17.603	1765.99	10.7333	1815.16	9.79599	1815.16	9.79599	95.0169
101517AL1-241	348.161	15004.2	2.70891	14.1353	6.08764	0.0378092	6.17917	0.00387784	1.05963	0.171484	24.9499	0.263865	37.6829	2.28581	949.156	124.709	24.9499	0.263865	NA
101517AL1-242	107.247	135203	1.23935	8.4168	0.598676	5.66189	1.03476	0.345777	0.843991	0.815637	1914.4	13.9791	1925.58	8.92989	1937.61	10.7121	1937.61	10.7121	98.8023
101517AL1-244	195.924	28614.9	1.62504	16.9391	3.53247	0.0997916	3.6514	0.0122651	0.92431	0.253139	78.5852	0.721961	96.584	3.36414	567.459	76.9222	78.5852	0.721961	NA
101517AL1-245	313.313	673680	1.42972	9.07662	0.536639	4.85041	1.07854	0.319441	0.93556	0.86743	1787	14.6013	1793.69	9.07968	1801.46	9.76248	1801.46	9.76248	99.1974
101517AL1-246	411.115	307008	1.50394	9.38238	0.622327	4.41192	1.19827	0.30035	1.02399	0.854559	1693.05	15.247	1714.58	9.91917	1740.97	11.4047	1740.97	11.4047	97.2474
101517AL1-247	325.765	144490	2.59169	9.2725	0.582115	4.66192	1.43148	0.313653	1.30778	0.913583	1758.66	20.129	1760.43	11.9684	1762.52	10.6408	1762.52	10.6408	99.7806
101517AL1-248	383.527	114291	11.9063	18.1131	0.605585	0.528078	1.18107	0.0694031	1.014	0.858542	432.559	4.24221	430.533	4.14438	419.688	13.5225	432.559	4.24221	103.067
101517AL1-249	987.976	200355	1.69163	9.68866	0.636379	4.03102	0.905636	0.283378	0.644359	0.711498	1608.35	9.17186	1640.48	7.36801	1681.88	11.7512	1681.88	11.7512	95.6285
101517AL1-250	303.69	99653.4	2.67249	16.2259	0.739673	0.882636	1.15189	0.103915	0.883026	0.766589	637.312	5.35839	642.405	5.48353	660.373	15.8361	637.312	5.35839	96.5078
101517AL1-251	72.4586	135055	2.72486	5.26644	0.526564	14.0868	0.901226	0.538291	0.731395	0.811556	2776.29	16.4987	2755.57	8.54454	2740.4	8.6595	2740.4	8.6595	101.31
101517AL1-252	223.549	121519	1.70366	8.8557	0.595699	4.33108	1.20889	0.278296	1.05193	0.870162	1582.77	14.7632	1699.3	9.97269	1846.16	10.7761	1846.16	10.7761	85.7334
101517AL1-253	293.464	2100.35	1.57146	24.7072	7.98758	0.0225863	8.10118	0.00404908	1.35193	0.166881	26.0493	0.351458	22.6786	1.81687	NA	NA	26.0493	0.351458	NA
101517AL1-256	764.904	34354.5	1.97046	17.6099	2.67715	0.0982873	3.07036	0.0125586	1.50333	0.489624	80.454	1.20197	95.1941	2.78999	482.3	59.1453	80.454	1.20197	NA
101517AL1-257	410.835	66310.9	2.73173	19.789	1.04501	0.186774	1.47307	0.0268182	1.03822	0.704797	170.603	1.748	173.873	2.35398	218.594	24.1866	170.603	1.748	NA
101517AL1-258	421.323	159279	2.54221	14.211	0.52175	1.55292	1.00603	0.160126	0.860156	0.855002	957.479	7.65338	951.657	6.2138	938.199	10.6943	938.199	10.6943	102.055
101517AL1-259	311.887	6.53004e+06	1.28623	11.3718	0.489307	2.82158	1.09294	0.232815	0.977294	0.894185	1349.23	11.8975	1361.29	8.19382	1380.24	9.40266	1380.24	9.40266	97.7533
101517AL1-260	208.927	912317	0.94194	8.71985	0.655361	5.36175	1.09233	0.339237	0.873898	0.800027	1883	14.27	1878.77	9.3482	1874.08	11.8176	1874.08	11.8176	100.476
101517AL1-261	125.348	146373	1.66157	12.3489	0.68441	2.29374	1.23116	0.205523	1.02339	0.831244	1204.92	11.2472	1210.36	8.7058	1220.05	13.4622	1220.05	13.4622	98.7599
101517AL1-263	408.655	24979.6	4.10055	17.1319	3.39627	0.0536892	3.6139	0.0066739	1.23515	0.341777	42.8798	0.527872	53.102	1.86974	542.745	74.2655	42.8798	0.527872	NA
101517AL1-265	463.799	221874	2.23757	13.4823	0.586109	1.76655	0.998006	0.172813	0.807769	0.809384	1027.59	7.67278	1033.25	6.47077	1045.28	11.8402	1045.28	11.8402	98.3075
101517AL1-267	115.923	2.45071e+06	1.3918	13.1757	0.739568	1.92205	1.24157	0.18375	0.997268	0.803229	1087.43	9.97923	1088.78	8.29256	1091.51	14.8058	1091.51	14.8058	99.6263
101517AL1-268	319.536	274011	1.86235	5.94447	0.433729	11.2672	0.985572	0.485977	0.885003	0.89796	2553.25	18.6581	2545.49	9.1918	2539.3	7.27353	2539.3	7.27353	100.549
101517AL1-269	821.548	6374.91	0.818266	12.7328	8.34254	0.186409	8.40557	0.0172218	1.02742	0.12223	110.074	1.12132	173.561	13.4108	1159.62	165.709	110.074	1.12132	NA
101517AL1-270	1447.07	80727.3	2.13644	20.164	0.598273	0.162944	1.34479	0.0238398	1.20437	0.895588	151.878	1.8078	153.276	1.91321	174.938	13.9419	151.878	1.8078	NA
101517AL1-271	751.752	76351.5	2.55302	9.41442	0.64128	4.34017	1.31556	0.296475	1.14867	0.873145	1673.8	16.9332	1701.03	10.8569	1734.72	11.7613	1734.72	11.7613	96.4887
101517AL1-272	146.688	73277.5	2.2357	14.1799	0.780629	1.52889	1.11739	0.157303	0.799489	0.715496	941.77	7.0052	942.053	6.85944	942.695	15.9954	942.695	15.9954	99.9018
101517AL1-273	221.772	135214	1.65025	13.3642	0.558449	1.83752	1.16954	0.178181	1.0276	0.878635	1057.03	10.0183	1058.97	7.69037	1063	11.2337	1063	11.2337	99.4384
101517AL1-274	433.844	383117	4.27563	9.2219	0.61673	4.08426	1.32014	0.273289	1.16722	0.884167	1557.47	16.1498	1651.17	10.7684	1772.52	11.2578	1772.52	11.2578	87.8677
101517AL1-275	557.117	157154	2.63905	9.60503	0.481339	4.51398	0.909549	0.314591	0.771746	0.848493	1763.26	11.9055	1733.55	7.56064	1697.87	8.86845	1697.87	8.86845	103.851
101517AL1-279	284.409	46790.4	2.27292	20.1987	1.17006	0.182688	1.62583	0.0267745	1.12885	0.694322	170.329	1.89759	170.371	2.55004	170.927	27.3033	170.329	1.89759	NA
101517AL1-280	603.819	303887	1.80831	19.605	0.987732	0.114081	1.38371	0.0162281	0.969037	0.700319	103.773	0.99755	109.691	1.4387	240.157	22.7833	103.773	0.99755	NA
101517AL1-281	533.866	38377.7	0.974724	20.157	1.76482	0.0796166	2.10134	0.0116444	1.14064	0.542816	74.6309	0.846363	77.7844	1.57348	175.752	41.1642	74.6309	0.846363	NA
101517AL1-282	224.838	6449.1	1.42335	18.2453	3.06677	0.0916114	3.21377	0.0121279	0.960858	0.298982	77.7115	0.742214	89.0033	2.73859	403.433	68.6928	77.7115	0.742214	NA
101517AL1-283	276.141	10398.2	1.73282	21.0238	1.52495	0.171507	1.79765	0.0261626	0.95188	0.529514	166.486	1.56446	160.726	2.67222	76.6397	36.2096	166.486	1.56446	NA
101517AL1-285	291.732	55401.3	4.10956	16.0398	1.41776	0.763042	2.32636	0.0888048	1.84443	0.792838	548.465	9.69767	575.764	10.2237	685.048	30.2468	548.465	9.69767	80.0623
101517AL1-286	84.5735	89786.5	0.901776	9.86798	0.553394	4.00212	0.906889	0.286554	0.718473	0.792239	1624.29	10.3159	1634.63	7.36763	1647.94	10.2631	1647.94	10.2631	98.5645
101517AL1-287	370.493	63739.5	2.36267	18.0977	0.713864	0.518283	1.1862	0.0680577	0.947344	0.79864	424.443	3.89142	424.004	4.11153	421.592	15.9347	424.443	3.89142	100.676
101517AL1-288	1252.96	43765	2.61543	20.6827	0.871205	0.0708774	1.47769	0.0106366	1.19355	0.807716	68.2058	0.809782	69.5317	0.993074	115.406	20.5379	68.2058	0.809782	NA
101517AL1-289	110.103	242465	1.98505	9.91471	0.604518	3.90982	1.13892	0.28127	0.965244	0.847508	1597.76	13.6596	1615.71	9.20929	1639.17	11.2239	1639.17	11.2239	97.4733
101517AL1-290	482.672	30942.3	2.52852	20.2372	1.02156	0.179455	1.38722	0.0263507	0.938503	0.676537	167.668	1.55328	167.591	2.14313	166.484	23.8895	167.668	1.55328	NA
101517AL1-291	165.988	1147.04	2.27262	28.7203	4.31003	0.0196191	4.44576	0.00408842	1.09012	0.245206	26.3019	0.286139	19.728	0.868593	NA	NA	26.3019	0.286139	NA
101517AL1-292	443.311	17090.1	2.35131	20.1252	0.923213	0.174091	1.45809	0.0254216	1.12858	0.774014	161.83	1.80365	162.963	2.19527	179.433	21.5364	161.83	1.80365	NA
101517AL1-293	446.447	296125	1.75163	9.93588	0.395771	4.08771	0.930608	0.294696	0.842257	0.905061	1664.95	12.3586	1651.85	7.59211	1635.21	7.35183	1635.21	7.35183	101.819
101517AL1-295	127.778	11228.6	1.22072	19.9911	2.77966	0.0819258	3.05499	0.0118835	1.26747	0.414884	76.1544	0.959553	79.9539	2.3489	195.042	64.6256	76.1544	0.959553	NA
101517AL1-296	24.983	23506.5	0.56759	5.40495	0.749888	13.4364	1.13104	0.526942	0.846708	0.748612	2728.55	18.8362	2710.82	10.6892	2697.62	12.3829	2697.62	12.3829	101.147
101517AL1-297	936.684	248646	2.06242	16.5624	0.620693	0.805248	1.36117	0.09677	1.21141	0.88998	595.452	6.89026	599.785	6.1651	616.179	13.4228	595.452	6.89026	96.6362
101517AL1-298	499.159	107911	2.28884	10.9102	0.426324	2.99567	0.935749	0.237144	0.832991	0.890186	1371.83	10.2932	1406.52	7.12362	1459.46	8.10478	1459.46	8.10478	93.9961
101517AL1-299	383.544	152267	2.01062	9.34967	0.410272	4.5331	1.03693	0.307524	0.952311	0.918397	1728.51	14.4387	1737.06	8.62612	1747.36	7.51197	1747.36	7.51197	98.9213
101517AL1-302	96.9899	1.94547e+06	1.61177	8.35725	0.550592	5.84304	1.25095	0.354315	1.12326	0.897929	1955.17	18.944	1952.82	10.8461	1950.31	9.83872	1950.31	9.83872	100.25
101517AL1-303	189.476	83249.7	17.6717	8.79922	0.580509	5.0834	1.16596	0.324553	1.01117	0.867245	1811.93	15.9721	1833.34	9.89316	1857.72	10.4866	1857.72	10.4866	97.535
101517AL1-304	85.6134	30987.1	1.87496	12.4703	0.853847	2.14764	1.05883	0.194324	0.626155	0.591364	1144.76	6.56757	1164.29	7.33569	1200.8	16.8118	1200.8	16.8118	95.3329
101517AL1-305	380.995	64004.5	2.45922	9.89621	0.635581	3.77749	1.24643	0.271244	1.07221	0.860222	1547.11	14.7479	1587.97	10.0073	1642.64	11.7953	1642.64	11.7953	94.1845
101517AL1-306	346.598	3662.35	1.65463	17.53	4.16096	0.0337257	4.43892	0.00428973	1.54609	0.348303	27.5942	0.425719	33.6797	1.47049	492.312	91.8065	27.5942	0.425719	NA
101517AL1-308	111.01	89431.9	2.21507	11.7236	0.649641	2.30517	1.0637	0.196088	0.842278	0.791835	1154.27	8.90146	1213.88	7.53299	1321.46	12.5864	1321.46	12.5864	87.3478
101517AL1-309	254.482	367677	2.35941	4.849	0.52286	15.965	0.980261	0.561707	0.829174	0.845871	2873.68	19.2254	2874.71	9.36697	2875.42	8.4935	2875.42	8.4935	99.9397
101517AL1-311	130.818	584763	61.4467	18.2565	1.0982	0.482529	1.34522	0.0639188	0.776911	0.577532	399.414	3.00891	399.806	4.44578	402.055	24.5982	399.414	3.00891	NA
101517AL1-312	181.371	146422	2.29487	13.4186	0.635669	1.75449	0.969299	0.170823	0.731755	0.754932	1016.64	6.88237	1028.82	6.26907	1054.82	12.8226	1054.82	12.8226	96.3802
101517AL1-313	219.491	17497.5	1.14623	16.5141	3.64953	0.0358801	3.9207	0.0042993	1.43278	0.36544	27.6557	0.395396	35.7937	1.37892	622.476	78.7568	27.6557	0.395396	NA
101517AL1-314	333.693	2822.65	1.73916	23.7528	2.81166	0.0242908	3.00141	0.00418644	1.05026	0.349921	26.9312	0.282256	24.3697	0.722726	NA	NA	26.9312	0.282256	NA

## Sheet: 101517AL2
U/Pb detrital zircon geochronologic analyses by LA-ICP-MS analysis
	Isotope Ratios										Apparent Ages (Ma)
Analysis	U	206Pb	U/Th	206Pb*	± 1σ	207Pb*	± 1σ	206Pb*	± 1σ	error	206Pb*	± 1σ	207Pb*	± 1σ	206Pb*	± 1σ	Best Age	± 1σ	% conc
	(ppm)	204Pb		207Pb*	(%)	235U	(%)	238U	(%)	corr.	238U	(Ma)	235U	(Ma)	207Pb*	(Ma)	(Ma)	(Ma)
Sample 101517AL2: (Lat/Long: 46.52790, -112.945)--NAD 1983 coordinate system
101517AL2-1	604.585	130660	1.62734	15.9968	0.710671	0.946638	1.26233	0.109877	1.04328	0.826469	672.032	6.65809	676.35	6.23315	690.762	15.1531	672.032	6.65809	97.2884
101517AL2-2	90.2363	180426	2.71653	9.49662	0.712755	4.04667	1.32248	0.27884	1.11398	0.842336	1585.52	15.6579	1643.63	10.7679	1718.75	13.1004	1718.75	13.1004	92.248
101517AL2-3	893.578	96673.7	2.10085	20.7717	0.81065	0.115393	1.31171	0.0173916	1.03123	0.786172	111.149	1.13639	110.887	1.37791	105.225	19.1348	111.149	1.13639	NA
101517AL2-4	242.72	192302	0.563619	10.0186	0.673863	3.86117	1.19251	0.280682	0.983863	0.825036	1594.8	13.9004	1605.6	9.61796	1619.8	12.541	1619.8	12.541	98.4565
101517AL2-5	228.227	22048.8	2.72872	12.2646	0.790546	2.03942	1.30604	0.181487	1.03961	0.795999	1075.09	10.2945	1128.77	8.89845	1233.55	15.5169	1233.55	15.5169	87.1542
101517AL2-6	219.443	4004.36	2.08237	11.4534	3.90657	0.177822	4.05828	0.0147776	1.09925	0.270867	94.5658	1.03193	166.184	6.22131	1366.5	75.2446	94.5658	1.03193	NA
101517AL2-7	278.665	435521	2.00628	11.1452	0.559836	2.98884	1.04573	0.241702	0.883253	0.844628	1395.54	11.0832	1404.78	7.95636	1418.82	10.7016	1418.82	10.7016	98.3592
101517AL2-8	131.911	1.33477e+06	0.8747	5.23436	0.463467	13.3975	1.13324	0.508833	1.03413	0.912545	2651.65	22.4817	2708.08	10.7079	2750.45	7.61778	2750.45	7.61778	96.4076
101517AL2-9	215.292	92036.8	1.77449	9.80188	0.583663	4.28299	1.14146	0.30461	0.980953	0.859385	1714.13	14.7649	1690.1	9.39659	1660.4	10.8055	1660.4	10.8055	103.236
101517AL2-11	433.793	576559	2.94656	9.19299	0.644045	4.83388	1.18115	0.322433	0.990111	0.838261	1801.6	15.5621	1790.81	9.93773	1778.25	11.7482	1778.25	11.7482	101.313
101517AL2-12	1722.17	96126.5	13.0889	13.8788	0.61432	1.4543	1.1128	0.146452	0.927865	0.833811	881.041	7.64085	911.653	6.69545	986.529	12.4825	986.529	12.4825	89.3072
101517AL2-13	1371.27	10109	2.50153	16.0662	3.71451	0.120244	3.80104	0.0140173	0.806448	0.212165	89.734	0.718644	115.294	4.14274	681.506	79.3656	89.734	0.718644	NA
101517AL2-16	358.816	4807.28	1.81269	11.4537	5.2806	0.746178	5.42579	0.0620121	1.24677	0.229787	387.851	4.69303	566.004	23.5464	1366.44	101.724	387.851	4.69303	NA
101517AL2-17	861.619	40527.9	1.81996	19.3491	1.33749	0.13097	1.682	0.0183874	1.01993	0.606379	117.456	1.18712	124.969	1.97778	270.347	30.649	117.456	1.18712	NA
101517AL2-19	422.311	176048	2.29969	10.756	0.472653	3.42903	0.903346	0.267614	0.769826	0.852194	1528.68	10.4769	1511.07	7.10156	1486.46	8.95304	1486.46	8.95304	102.84
101517AL2-20	242.593	1207.32	2.08623	5.00596	22.0815	0.555274	22.7876	0.0201689	5.62867	0.247006	128.723	7.17355	448.446	82.7922	2823.53	365.54	128.723	7.17355	NA
101517AL2-21	119.198	20789.7	2.79857	10.9191	0.908328	3.01579	1.49765	0.238934	1.19075	0.795081	1381.15	14.8036	1411.62	11.4206	1457.89	17.272	1457.89	17.272	94.7362
101517AL2-22	523.958	36904.4	1.99306	17.5675	0.772622	0.52518	1.21732	0.0669431	0.94071	0.772768	417.713	3.80486	428.606	4.25624	487.621	17.0467	417.713	3.80486	85.6635
101517AL2-23	131.111	119356	3.1708	9.12999	0.550743	4.78394	1.08453	0.316916	0.93428	0.861464	1774.65	14.4938	1782.08	9.10843	1790.78	10.0323	1790.78	10.0323	99.099
101517AL2-24	428.308	29246.6	0.897694	19.0546	1.12978	0.267289	1.61864	0.0369545	1.15913	0.716117	233.928	2.66293	240.524	3.46646	305.437	25.7329	233.928	2.66293	NA
101517AL2-26	269.297	87009.7	2.27424	12.0712	0.771149	2.32121	1.47538	0.203306	1.2578	0.852529	1193.06	13.6995	1218.79	10.4705	1264.67	15.0625	1264.67	15.0625	94.3375
101517AL2-27	811.029	83160.6	2.74532	20.9995	1.0221	0.0967504	1.4863	0.0147418	1.07907	0.726012	94.3378	1.01056	93.7723	1.33132	79.3864	24.2502	94.3378	1.01056	NA
101517AL2-28	34.3322	70644.8	2.28109	4.92657	0.572665	15.7679	1.33395	0.563644	1.20477	0.903162	2881.67	27.9957	2862.84	12.7376	2849.6	9.32846	2849.6	9.32846	101.126
101517AL2-29	270.522	128053	1.26535	12.9319	0.697391	2.03431	1.27876	0.190883	1.07185	0.838197	1126.15	11.0752	1127.06	8.70534	1128.82	13.8923	1128.82	13.8923	99.7635
101517AL2-30	392.766	744872	2.49229	9.16393	0.598751	4.8877	1.03508	0.324993	0.84433	0.815713	1814.07	13.3503	1800.14	8.72518	1784.02	10.914	1784.02	10.914	101.684
101517AL2-31	261.147	385310	1.70309	10.7581	0.741351	3.23673	1.35386	0.252656	1.13284	0.836751	1452.16	14.7294	1466	10.5025	1486.09	14.0435	1486.09	14.0435	97.7165
101517AL2-32	383.93	45021.3	2.93108	17.2956	0.616473	0.636575	1.06999	0.0798862	0.874551	0.817345	495.443	4.17059	500.183	4.22596	521.908	13.5291	495.443	4.17059	94.9294
101517AL2-33	943.963	38678.9	1.40001	16.7508	0.964555	0.451272	1.33024	0.054848	0.916063	0.688645	344.217	3.07054	378.17	4.20003	591.711	20.8918	344.217	3.07054	NA
101517AL2-34	1731.31	37984.3	2.7442	19.5709	1.28791	0.111071	1.56045	0.0157724	0.881067	0.564624	100.882	0.881918	106.944	1.58393	244.174	29.6672	100.882	0.881918	NA
101517AL2-35	441.293	8.11361e+06	1.37221	18.0438	0.508686	0.535193	1.10558	0.0700689	0.981598	0.887862	436.571	4.14348	435.25	3.91352	428.248	11.3412	436.571	4.14348	101.944
101517AL2-36	278.928	423450	1.52259	10.0287	0.617234	4.02413	0.991226	0.292821	0.775597	0.782462	1655.61	11.3245	1639.08	8.06163	1617.93	11.4897	1617.93	11.4897	102.329
101517AL2-37	79.6335	8039.58	1.43238	7.28023	2.182	6.52092	2.31998	0.344462	0.788156	0.339725	1908.1	13.0174	2048.73	20.4273	2193.39	37.93	2193.39	37.93	86.9933
101517AL2-38	119.958	12333	2.02621	17.9746	2.429	0.111337	2.96124	0.0145207	1.69378	0.571984	92.9332	1.56279	107.188	3.0123	436.805	54.1036	92.9332	1.56279	NA
101517AL2-39	45.2524	7870.17	1.77259	4.98381	2.44356	13.7743	2.65242	0.498102	1.03166	0.388952	2605.64	22.1123	2734.31	25.1144	2830.77	39.8738	2830.77	39.8738	92.0469
101517AL2-40	125.176	129600	2.98244	9.60913	0.63825	3.77963	1.26951	0.263524	1.0974	0.864429	1507.85	14.7543	1588.43	10.1938	1697.08	11.7613	1697.08	11.7613	88.8495
101517AL2-41	280.319	46920	2.63664	13.3655	0.510401	1.78224	0.982133	0.172838	0.839092	0.854357	1027.73	7.97131	1039	6.38818	1062.8	10.2667	1062.8	10.2667	96.7003
101517AL2-42	284.104	196819	2.38672	9.49667	0.55713	4.48305	1.01039	0.30891	0.842905	0.834239	1735.34	12.8239	1727.84	8.3884	1718.74	10.24	1718.74	10.24	100.966
101517AL2-43	232.374	24122.8	1.96544	8.14956	0.754008	5.69113	1.12474	0.336527	0.834573	0.742014	1869.94	13.5465	1930.02	9.71392	1995.15	13.4013	1995.15	13.4013	93.7242
101517AL2-46	137.311	1.63237e+06	3.24277	13.4805	0.706518	1.74827	1.15921	0.171002	0.919027	0.792802	1017.63	8.65149	1026.53	7.48775	1045.55	14.2686	1045.55	14.2686	97.3299
101517AL2-47	712.086	31047.9	1.69968	19.2074	1.21021	0.181361	1.52367	0.0252755	0.925719	0.60756	160.911	1.47115	169.231	2.3751	287.214	27.675	160.911	1.47115	NA
101517AL2-48	1260.26	16017.1	1.44639	18.1942	1.55129	0.117538	1.80259	0.0155167	0.918065	0.509303	99.259	0.904282	112.838	1.92506	409.705	34.7012	99.259	0.904282	NA
101517AL2-49	1165.98	182877	1.36471	9.17735	0.468886	3.89985	1.13124	0.259689	1.02949	0.910054	1488.25	13.6814	1613.65	9.14241	1781.35	8.54925	1781.35	8.54925	83.5459
101517AL2-50	533.965	24125.9	2.68036	16.7047	2.22412	0.102676	2.44327	0.012445	1.01137	0.41394	79.7308	0.801405	99.2437	2.31007	597.676	48.1985	79.7308	0.801405	NA
101517AL2-52	282.052	73484.8	2.70768	9.1477	0.56114	4.91511	1.12115	0.326237	0.970619	0.865734	1820.12	15.3915	1804.85	9.45969	1787.25	10.2243	1787.25	10.2243	101.839
101517AL2-53	25.2084	7169.17	3.13556	11.9157	1.38467	2.06869	1.68568	0.178856	0.961361	0.57031	1060.72	9.40258	1138.5	11.5389	1289.9	26.9497	1289.9	26.9497	82.2328
101517AL2-54	270.401	2.0337e+06	2.06338	7.78015	0.659327	6.18069	1.18656	0.348909	0.986514	0.831408	1929.39	16.4495	2001.72	10.3706	2077.21	11.6083	2077.21	11.6083	92.8835
101517AL2-55	147.241	130243	2.25514	8.14227	0.614837	5.87102	1.2127	0.346854	1.04529	0.861948	1919.56	17.3532	1956.96	10.5218	1996.74	10.9253	1996.74	10.9253	96.1344
101517AL2-56	314.369	15596.5	1.83259	17.6763	1.89862	0.203193	2.09831	0.0260609	0.89339	0.425767	165.848	1.46277	187.825	3.59812	473.977	42.0004	165.848	1.46277	NA
101517AL2-57	83.5725	53097	1.82014	5.36937	0.551988	12.941	0.91401	0.504174	0.728508	0.797046	2631.71	15.7411	2675.37	8.6152	2708.52	9.108	2708.52	9.108	97.1641
101517AL2-59	102.989	48232.4	1.27353	9.86423	0.644273	4.04951	1.25297	0.289837	1.07464	0.857673	1640.71	15.5669	1644.2	10.2033	1648.65	11.9474	1648.65	11.9474	99.5189
101517AL2-60	640.887	1.36136e+06	1.02545	5.11677	0.400742	13.3811	0.935204	0.496794	0.844992	0.903538	2600	18.0795	2706.93	8.83582	2787.73	6.56087	2787.73	6.56087	93.2661
101517AL2-61	516.691	375442	4.66365	12.7262	0.659582	2.10296	1.3138	0.194187	1.13623	0.864843	1144.01	11.9105	1149.78	9.04117	1160.64	13.0831	1160.64	13.0831	98.5677
101517AL2-62	191.436	51715.8	0.947904	9.70163	0.525261	4.03027	1.05946	0.283705	0.920088	0.868448	1609.99	13.1084	1640.32	8.61923	1679.4	9.7023	1679.4	9.7023	95.8669
101517AL2-63	600.33	207063	2.31458	9.54914	0.646944	4.08872	1.52247	0.283295	1.37818	0.905226	1607.94	19.6127	1652.06	12.4216	1708.61	11.9042	1708.61	11.9042	94.108
101517AL2-64	869.659	225747	5.00615	4.84506	0.33323	14.3631	0.952885	0.504935	0.892719	0.936859	2634.97	19.3087	2774	9.04589	2876.74	5.41484	2876.74	5.41484	91.5958
101517AL2-65	178.175	133439	2.73459	9.53724	0.587554	4.32026	1.22003	0.298965	1.06923	0.876397	1686.17	15.864	1697.24	10.0599	1710.9	10.8081	1710.9	10.8081	98.5546
101517AL2-66	392.793	8378.84	1.01593	21.9762	1.23138	0.0753363	1.74428	0.0120128	1.2354	0.708259	76.9781	0.945331	73.7508	1.24081	NA	NA	76.9781	0.945331	NA
101517AL2-67	111.572	106351	1.19366	6.52952	0.55159	9.3655	0.981299	0.443711	0.811601	0.827068	2367.23	16.0798	2374.46	9.00292	2380.65	9.39665	2380.65	9.39665	99.4363
101517AL2-68	372.65	87087.6	1.95491	12.6054	0.697964	2.00433	1.26218	0.183321	1.05164	0.833193	1085.09	10.5026	1116.98	8.55034	1179.57	13.8006	1179.57	13.8006	91.9906
101517AL2-69	169.109	27612.5	1.36595	9.72046	0.668353	3.92199	1.16746	0.276619	0.957213	0.819914	1574.31	13.3705	1618.23	9.44601	1675.82	12.3494	1675.82	12.3494	93.9426
101517AL2-71	161.507	50663.9	4.14115	8.56169	0.723839	5.38038	1.24427	0.334242	1.01206	0.813377	1858.91	16.3438	1881.74	10.6544	1907.01	13.0011	1907.01	13.0011	97.4774
101517AL2-72	1307.75	14938	2.07098	9.49205	0.597634	0.921648	1.06546	0.0634765	0.882069	0.827873	396.733	3.39395	663.231	5.18876	1719.64	10.9832	396.733	3.39395	NA
101517AL2-73	700.55	6.78024e+06	5.06539	13.2554	0.542176	1.87141	1.1838	0.179991	1.05234	0.888954	1066.92	10.3478	1071.03	7.83413	1079.38	10.8606	1079.38	10.8606	98.8463
101517AL2-74	811.533	29269.7	1.15681	16.7037	0.974979	0.487005	1.9495	0.0590247	1.68818	0.865957	369.692	6.06548	402.868	6.48305	597.849	21.1052	369.692	6.06548	NA
101517AL2-75	215.032	94654.3	3.25358	9.26374	0.759769	4.72053	1.37361	0.317296	1.14436	0.833104	1776.51	17.7691	1770.89	11.5098	1764.25	13.8853	1764.25	13.8853	100.695
101517AL2-77	253.33	132380	2.27537	10.7298	0.678848	3.27231	1.06031	0.25476	0.814511	0.76818	1462.98	10.6607	1474.49	8.24641	1491.09	12.8509	1491.09	12.8509	98.1147
101517AL2-79	347.843	31474.2	2.04391	19.7575	1.37923	0.104526	1.83993	0.0149845	1.2178	0.661876	95.8799	1.15899	100.945	1.76798	222.268	31.8984	95.8799	1.15899	NA
101517AL2-80	222.261	302743	2.27772	9.26082	0.624865	4.61522	1.33099	0.31012	1.17519	0.882946	1741.3	17.9328	1752.02	11.1083	1764.83	11.419	1764.83	11.419	98.6666
101517AL2-81	606.34	1.54425e+06	2.15322	11.12	0.630813	3.11758	1.07786	0.251542	0.873984	0.810854	1446.42	11.3237	1437.04	8.28658	1423.15	12.0513	1423.15	12.0513	101.635
101517AL2-82	1407.2	174182	3.92144	13.1537	0.64102	1.81083	1.01872	0.172828	0.791758	0.77721	1027.67	7.52125	1049.38	6.66398	1094.84	12.8154	1094.84	12.8154	93.8652
101517AL2-83	687.19	5177.6	2.03068	14.0915	4.97607	0.148122	5.04028	0.0151448	0.801964	0.159111	96.8979	0.771275	140.253	6.60272	955.495	101.825	96.8979	0.771275	NA
101517AL2-85	151.964	76923.6	1.9026	9.40514	0.777031	4.41707	1.24206	0.30143	0.968981	0.780143	1698.4	14.4677	1715.54	10.2838	1736.52	14.2482	1736.52	14.2482	97.8044
101517AL2-86	384.666	57299.6	1.2665	17.9265	0.797192	0.456289	1.32021	0.0593503	1.05236	0.797109	371.673	3.80071	381.674	4.20019	442.765	17.7296	371.673	3.80071	NA
101517AL2-87	682.435	21324.3	5.65452	18.5274	1.27205	0.135901	1.46934	0.0182694	0.735427	0.500514	116.709	0.850588	129.387	1.78499	368.972	28.6367	116.709	0.850588	NA
101517AL2-88	474.427	180135	4.83421	13.4164	0.64047	1.7622	1.32478	0.171546	1.15967	0.875369	1020.62	10.9464	1031.66	8.58189	1055.15	12.9182	1055.15	12.9182	96.7276
101517AL2-89	173.9	102121	3.0425	11.3064	0.668686	2.85672	1.07455	0.234357	0.841135	0.782782	1357.29	10.2949	1370.58	8.0819	1391.33	12.8303	1391.33	12.8303	97.5535
101517AL2-90	371.253	61695.5	2.06947	11.2752	0.594061	2.86626	1.12192	0.234493	0.951735	0.848308	1358	11.654	1373.09	8.44554	1396.62	11.3902	1396.62	11.3902	97.235
101517AL2-91	180.497	712097	1.91364	10.6656	0.660304	3.28924	1.23935	0.254546	1.0488	0.846252	1461.88	13.7181	1478.51	9.65055	1502.44	12.4809	1502.44	12.4809	97.3003
101517AL2-92	942.538	278008	2.66307	10.7188	0.758064	2.93263	1.34663	0.228081	1.11299	0.826502	1324.44	13.3252	1390.37	10.1969	1493.03	14.3468	1493.03	14.3468	88.7082
101517AL2-93	470.742	92436.3	3.82353	11.2889	0.454163	3.0484	1.07928	0.249696	0.97907	0.907152	1436.91	12.6107	1419.83	8.25205	1394.3	8.71058	1394.3	8.71058	103.056
101517AL2-94	252.214	168406	1.96599	9.09736	0.704005	4.98972	1.18456	0.329366	0.952659	0.80423	1835.31	15.2157	1817.58	10.0201	1797.3	12.8138	1797.3	12.8138	102.114
101517AL2-95	306.745	105548	3.2703	9.2042	0.588677	4.80684	1.31398	0.321021	1.17474	0.894029	1794.71	18.4028	1786.1	11.0448	1776.03	10.741	1776.03	10.741	101.052
101517AL2-96	270.493	87195.8	2.76384	11.4622	0.659905	2.6705	1.30952	0.222099	1.13109	0.863745	1292.96	13.2513	1320.33	9.67438	1365.03	12.7088	1365.03	12.7088	94.7202
101517AL2-97	273.666	130900	3.50687	8.30544	0.520468	5.55553	1.16571	0.334793	1.04307	0.894793	1861.57	16.8653	1909.23	10.0312	1961.41	9.28629	1961.41	9.28629	94.9097
101517AL2-98	397.245	36599.4	9.13008	18.1609	0.744908	0.453602	1.13999	0.0597722	0.862948	0.756982	374.24	3.13754	379.799	3.61211	413.807	16.6501	374.24	3.13754	NA
101517AL2-99	177.868	27318.9	2.33497	12.99	0.551352	1.96653	1.0325	0.185352	0.872969	0.845488	1096.15	8.79967	1104.12	6.94992	1119.86	11.0033	1119.86	11.0033	97.8825
101517AL2-101	330.184	88901.8	2.41154	20.1216	0.87604	0.176134	1.21049	0.0257154	0.835364	0.690106	163.677	1.35008	164.728	1.84067	179.845	20.4218	163.677	1.35008	NA
101517AL2-102	55.3618	112972	2.65009	14.0401	0.890989	1.55343	1.34591	0.158252	1.00877	0.749508	947.053	8.88499	951.856	8.31427	962.999	18.2089	962.999	18.2089	98.3441
101517AL2-103	222.263	10225.2	2.89078	17.3433	1.42301	0.143886	1.69368	0.0181067	0.91847	0.542294	115.679	1.053	136.499	2.1632	515.852	31.2598	115.679	1.053	NA
101517AL2-104	217.042	445072	2.52876	9.23476	0.42806	4.70304	1.09418	0.315131	1.00697	0.920299	1765.91	15.5546	1767.78	9.16224	1769.98	7.81747	1769.98	7.81747	99.7702
101517AL2-105	266.6	233137	2.29623	8.8273	0.513958	5.14627	1.07738	0.329616	0.946883	0.878878	1836.52	15.132	1843.78	9.15989	1851.97	9.29059	1851.97	9.29059	99.1659
101517AL2-106	334.431	38129.1	1.9216	12.3453	1.03987	1.89725	1.28581	0.169948	0.756291	0.588181	1011.82	7.08201	1080.13	8.54981	1220.63	20.4384	1220.63	20.4384	82.8937
101517AL2-107	280.272	90065.4	1.31834	9.82483	0.474257	3.99553	1.33878	0.284831	1.25196	0.935152	1615.65	17.8917	1633.29	10.873	1656.06	8.78453	1656.06	8.78453	97.5594
101517AL2-108	288.533	1.33456e+06	1.38624	6.25021	0.685582	10.443	1.36855	0.473594	1.18445	0.865474	2499.3	24.5395	2474.87	12.6824	2454.85	11.5915	2454.85	11.5915	101.811
101517AL2-109	568.859	30560.9	2.02691	19.7926	1.03461	0.105859	1.47317	0.0152027	1.04872	0.711879	97.2653	1.01238	102.171	1.4319	218.171	23.9249	97.2653	1.01238	NA
101517AL2-110	533.305	20044.1	1.85454	19.5505	1.48604	0.108296	1.89235	0.0153623	1.17162	0.619134	98.2789	1.14272	104.405	1.87753	246.598	34.2421	98.2789	1.14272	NA
101517AL2-112	140.825	105246	3.08267	9.76627	0.801154	4.02355	1.26936	0.285119	0.984593	0.775662	1617.09	14.0818	1638.97	10.3235	1667.13	14.82	1667.13	14.82	96.9986
101517AL2-113	511.449	92099.1	2.55595	13.1313	0.625261	1.78442	1.19827	0.170017	1.02221	0.853067	1012.2	9.5754	1039.79	7.79752	1098.26	12.4941	1098.26	12.4941	92.1644
101517AL2-114	280.869	94186.1	0.7664	9.87684	0.897713	3.89095	3.5495	0.278844	3.4341	0.967489	1585.54	48.2707	1611.81	28.6797	1646.28	16.6525	1646.28	16.6525	96.3105
101517AL2-115	191.883	15830.9	1.69371	20.79	1.74357	0.105359	2.07362	0.0158932	1.12244	0.541294	101.649	1.132	101.711	2.00691	103.143	41.207	101.649	1.132	NA
101517AL2-116	279.116	179122	1.58329	8.51272	0.664549	4.54663	1.22972	0.280831	1.03469	0.841404	1595.55	14.6246	1739.54	10.2356	1917.31	11.9195	1917.31	11.9195	83.218
101517AL2-118	115.739	105882	3.52242	12.0175	0.602514	2.34656	0.855096	0.204613	0.606767	0.709589	1200.05	6.64394	1226.51	6.08811	1273.33	11.7359	1273.33	11.7359	94.2456
101517AL2-121	289.579	194126	2.82915	11.5232	0.659388	2.74188	1.33419	0.22925	1.15986	0.869336	1330.57	13.9442	1339.89	9.92708	1354.79	12.7165	1354.79	12.7165	98.2117
101517AL2-122	183.58	68874.2	1.43382	4.98573	0.531751	12.1	2.35826	0.437727	2.29753	0.974247	2340.46	45.0934	2612.19	22.121	2830.14	8.67324	2830.14	8.67324	82.6975
101517AL2-123	205.323	34774.1	2.45656	9.50112	0.96796	4.18335	1.23454	0.288394	0.766255	0.62068	1633.5	11.0568	1670.76	10.1173	1717.88	17.7914	1717.88	17.7914	95.088
101517AL2-124	360.17	127471	1.79411	18.5083	1.05366	0.131544	1.54459	0.0176654	1.12941	0.731204	112.885	1.26384	125.484	1.82324	371.288	23.7291	112.885	1.26384	NA
101517AL2-126	1843.73	14390.2	1.34919	18.3989	0.945527	0.0788599	1.24463	0.0105278	0.809374	0.650292	67.5117	0.543571	77.0725	0.923766	384.619	21.2437	67.5117	0.543571	NA
101517AL2-127	366.398	8402.93	3.42678	16.5923	1.153	0.176642	1.79827	0.0212661	1.37999	0.767396	135.652	1.85243	165.167	2.74117	612.288	24.9209	135.652	1.85243	NA
101517AL2-129	121.896	199386	1.20702	4.53504	0.426621	17.9065	0.86232	0.589223	0.749394	0.869043	2986.27	17.9112	2984.72	8.29292	2983.68	6.86424	2983.68	6.86424	100.087
101517AL2-130	366.926	26463.1	1.30736	19.7209	1.53708	0.107851	1.7891	0.0154326	0.915571	0.51175	98.7249	0.897011	103.998	1.76851	226.564	35.524	98.7249	0.897011	NA
101517AL2-131	257.526	2.76098e+06	4.54354	10.6954	0.599527	3.38339	1.10127	0.262565	0.923778	0.838829	1502.95	12.3842	1500.56	8.63131	1497.16	11.3401	1497.16	11.3401	100.387
101517AL2-132	735.813	96788.6	2.8734	12.89	0.5088	2.09696	1.01875	0.196125	0.882599	0.866352	1154.47	9.32908	1147.81	7.00424	1135.27	10.1419	1135.27	10.1419	101.691
101517AL2-133	148.566	98018.8	1.21741	5.49501	0.536613	12.8348	1.18238	0.511736	1.0536	0.891083	2664.04	22.9915	2667.6	11.1384	2670.3	8.88602	2670.3	8.88602	99.7656
101517AL2-136	184.017	107246	1.46392	12.6754	0.718236	1.96107	1.1935	0.180361	0.953191	0.798654	1068.94	9.38914	1102.25	8.02611	1168.61	14.2427	1168.61	14.2427	91.4712
101517AL2-137	409.696	244726	1.60681	9.42871	0.475246	4.48795	1.05538	0.307035	0.942319	0.892873	1726.1	14.2698	1728.75	8.76369	1731.93	8.72043	1731.93	8.72043	99.6632
101517AL2-138	831.865	75561.7	0.893189	17.6801	0.646026	0.523493	1.12672	0.0671557	0.923124	0.819299	418.997	3.74484	427.482	3.93116	473.51	14.2977	418.997	3.74484	88.4873
101517AL2-139	159.479	119749	2.27943	11.4065	0.582127	2.93077	1.07441	0.242562	0.903041	0.8405	1400	11.364	1389.89	8.13416	1374.39	11.1953	1374.39	11.1953	101.863
101517AL2-140	439.565	106305	2.04885	10.6727	0.654739	3.1445	1.17	0.243507	0.969648	0.828759	1404.91	12.2404	1443.65	9.01378	1501.18	12.3778	1501.18	12.3778	93.5865
101517AL2-141	562.656	916766	3.32614	9.53078	0.644802	4.43933	1.14694	0.306997	0.948529	0.827007	1725.91	14.3625	1719.71	9.50509	1712.15	11.8595	1712.15	11.8595	100.804
101517AL2-142	1369.86	42467.4	3.73204	18.0691	0.601298	0.332109	1.06698	0.0435416	0.881414	0.826082	274.748	2.37079	291.174	2.70102	425.119	13.4137	274.748	2.37079	NA
101517AL2-144	144.897	237658	3.04613	9.99057	0.706269	3.80035	1.23182	0.275487	1.00924	0.819309	1568.59	14.0521	1592.82	9.90245	1625.01	13.1353	1625.01	13.1353	96.5283
101517AL2-145	944.528	90904.4	3.54174	17.4238	0.771823	0.536991	1.05876	0.0678887	0.724751	0.684527	423.423	2.97015	436.439	3.756	505.684	16.9651	423.423	2.97015	83.7328
101517AL2-147	162.725	151357	2.25732	13.5878	0.69368	1.55475	1.09474	0.153284	0.846912	0.773621	919.345	7.25633	952.383	6.76486	1029.5	14.044	1029.5	14.044	89.3002
101517AL2-148	922.339	62278.6	1.29938	12.9958	0.57642	1.59419	2.84767	0.150325	2.78872	0.979299	902.785	23.4928	967.94	17.7706	1118.99	11.5085	1118.99	11.5085	80.6784
101517AL2-149	123.592	371534	1.37962	13.009	0.894245	1.89726	1.22407	0.179085	0.835861	0.682856	1061.97	8.18403	1080.13	8.13924	1116.97	17.8637	1116.97	17.8637	95.0768
101517AL2-151	183.127	8182.08	3.02532	21.3359	1.78652	0.0989571	2.10527	0.0153196	1.11378	0.529044	98.0074	1.08333	95.8132	1.92488	41.5535	42.7054	98.0074	1.08333	NA
101517AL2-152	351.527	438228	2.91177	9.17449	0.562007	4.7521	1.14492	0.316341	0.997487	0.871232	1771.84	15.453	1776.48	9.60452	1781.92	10.2468	1781.92	10.2468	99.4339
101517AL2-153	266.603	121767	3.69778	9.43654	0.711489	4.5345	1.64868	0.310477	1.48726	0.902089	1743.06	22.7147	1737.32	13.7165	1730.41	13.0562	1730.41	13.0562	100.731
101517AL2-154	2161.95	13604.1	2.5596	17.2426	1.19504	0.0850962	1.50605	0.0106463	0.916555	0.608582	68.2679	0.622411	82.925	1.19925	528.678	26.1962	68.2679	0.622411	NA
101517AL2-155	1327.59	182696	1.76696	18.9605	0.682431	0.322698	1.30884	0.0443949	1.11685	0.853312	280.017	3.06042	283.976	3.24231	316.673	15.5249	280.017	3.06042	NA
101517AL2-156	64.5142	20318.2	2.02854	11.1011	0.721117	3.097	1.06619	0.249455	0.785339	0.736583	1435.67	10.1076	1431.95	8.18371	1426.41	13.7705	1426.41	13.7705	100.649
101517AL2-157	309.156	91090	1.5229	10.4987	0.626184	3.40137	1.28224	0.259106	1.11894	0.872646	1485.27	14.8437	1504.71	10.0619	1532.18	11.7878	1532.18	11.7878	96.9383
101517AL2-158	510.414	1.01249e+06	6.98084	8.92201	0.533374	5.15947	1.12841	0.334007	0.994391	0.881235	1857.77	16.0499	1845.96	9.59776	1832.65	9.66619	1832.65	9.66619	101.371
101517AL2-159	552.512	89248.8	1.97838	11.561	0.577953	2.75218	0.978004	0.230867	0.788963	0.806707	1339.04	9.53951	1342.68	7.28402	1348.46	11.1558	1348.46	11.1558	99.3013
101517AL2-160	1385.01	40854.4	35.2377	13.0044	0.824302	1.82201	1.18763	0.171922	0.854986	0.719907	1022.69	8.08555	1053.41	7.78598	1117.66	16.4508	1117.66	16.4508	91.5027
101517AL2-161	430.17	150215	6.25923	5.57237	0.698514	12.466	1.36589	0.504026	1.17377	0.859345	2631.08	25.3573	2640.16	12.8398	2647.12	11.5895	2647.12	11.5895	99.3939
101517AL2-162	194.792	95494.3	1.82087	9.82555	0.547357	3.99588	1.04306	0.284877	0.887909	0.851251	1615.88	12.6906	1633.36	8.47133	1655.93	10.139	1655.93	10.139	97.5814
101517AL2-163	746.179	57111.2	1.97373	12.5594	0.858641	1.9189	1.33199	0.174868	1.0183	0.764496	1038.88	9.77048	1087.69	8.89152	1186.79	16.9594	1186.79	16.9594	87.5368
101517AL2-165	810.555	35633.1	1.53362	18.8503	1.39922	0.102497	1.6856	0.014019	0.939912	0.557612	89.7446	0.837675	99.0784	1.59117	329.904	31.7421	89.7446	0.837675	NA
101517AL2-166	247.084	397946	2.90344	9.22485	0.592482	4.69947	1.01474	0.314555	0.823806	0.811842	1763.08	12.7075	1767.15	8.49587	1771.94	10.8159	1771.94	10.8159	99.5001
101517AL2-168	791.915	32827.5	1.68318	17.3617	0.963707	0.42656	1.51123	0.0537355	1.16408	0.770286	337.415	3.82675	360.731	4.58831	513.546	21.1644	337.415	3.82675	NA
101517AL2-169	576.514	870650	4.94915	9.06909	0.864085	4.50922	1.49612	0.296724	1.22136	0.816355	1675.04	18.0165	1732.67	12.4345	1802.97	15.7148	1802.97	15.7148	92.9049
101517AL2-170	437.672	117239	1.86884	19.9869	1.71743	0.104768	1.97429	0.0151937	0.973793	0.493236	97.208	0.939503	101.168	1.90108	195.524	39.9297	97.208	0.939503	NA
101517AL2-171	158.491	27414.8	2.33642	11.5591	0.806235	2.64777	1.34787	0.222071	1.08016	0.801381	1292.81	12.6532	1314.02	9.93447	1348.79	15.5624	1348.79	15.5624	95.8499
101517AL2-172	40.2623	6304.76	1.06078	14.281	1.22818	1.52031	1.49606	0.157536	0.854263	0.571009	943.067	7.4947	938.603	9.16365	928.158	25.2197	928.158	25.2197	101.606
101517AL2-173	166.959	45577.1	2.51778	13.1036	0.680969	1.94049	1.28094	0.184497	1.08494	0.846985	1091.5	10.8938	1095.17	8.58342	1102.45	13.6364	1102.45	13.6364	99.0061
101517AL2-174	277.005	160106	2.08292	9.03672	0.734945	4.85323	1.31294	0.318222	1.08796	0.828647	1781.04	16.9307	1794.18	11.0542	1809.47	13.3551	1809.47	13.3551	98.429
101517AL2-175	222.555	109122	4.51486	19.8778	1.19605	0.223087	1.67869	0.0321758	1.1779	0.701681	204.151	2.36702	204.476	3.10898	208.239	27.7541	204.151	2.36702	NA
101517AL2-177	128.812	24312.9	2.31577	15.5742	1.07905	0.975932	1.42233	0.110284	0.926644	0.651497	674.4	5.9335	691.516	7.13321	747.569	22.8018	674.4	5.9335	90.2124
101517AL2-178	2040.58	29115	3.42885	20.3973	0.735609	0.125542	1.22413	0.0185802	0.978452	0.799305	118.677	1.15057	120.084	1.38639	148.078	17.2239	118.677	1.15057	NA
101517AL2-179	109.946	119366	2.47365	5.89367	0.590579	11.2862	0.946593	0.48264	0.739766	0.781504	2538.75	15.5239	2547.07	8.82946	2553.68	9.88708	2553.68	9.88708	99.4156
101517AL2-180	377.728	7895.66	2.16134	15.9677	3.9377	0.148261	4.12339	0.0171774	1.22349	0.29672	109.792	1.33192	140.376	5.406	694.66	83.9568	109.792	1.33192	NA
101517AL2-181	412.657	1.54604e+06	0.993731	13.5516	0.614623	1.73165	0.983219	0.17027	0.767436	0.780534	1013.6	7.198	1020.36	6.32879	1034.89	12.4354	1034.89	12.4354	97.9421
101517AL2-182	484.435	193626	3.00121	9.3453	0.621237	4.61509	1.10941	0.31294	0.919157	0.828512	1755.16	14.1229	1752	9.25884	1748.22	11.3744	1748.22	11.3744	100.397
101517AL2-183	208.091	96981.3	1.54338	10.8075	0.663579	3.11633	1.01079	0.244374	0.762465	0.754328	1409.4	9.65255	1436.73	7.77018	1477.42	12.5849	1477.42	12.5849	95.3959
101517AL2-185	96.1413	102530	4.80933	5.85446	0.56924	11.2162	1.29891	0.476453	1.16753	0.898856	2511.8	24.2879	2541.26	12.1099	2564.85	9.52242	2564.85	9.52242	97.9314
101517AL2-186	123.194	47163.2	2.30644	9.7993	0.494011	4.04909	0.942587	0.287899	0.80276	0.851656	1631.02	11.5681	1644.12	7.67545	1660.88	9.1449	1660.88	9.1449	98.202
101517AL2-187	440.889	45021.3	1.90907	16.6194	1.98298	0.126128	2.37277	0.0152096	1.303	0.549149	97.3089	1.25842	120.613	2.69842	608.75	42.8641	97.3089	1.25842	NA
101517AL2-188	551.914	401259	2.19907	9.97174	0.506297	4.10224	1.22727	0.296811	1.11797	0.91094	1675.47	16.495	1654.75	10.0195	1628.52	9.41144	1628.52	9.41144	102.883
101517AL2-189	134.372	97468.8	1.80098	11.6271	0.628013	2.50667	1.13023	0.211473	0.939696	0.831417	1236.66	10.5742	1273.97	8.20371	1337.46	12.14	1337.46	12.14	92.463
101517AL2-190	110.851	19783.4	2.27834	8.86098	0.938186	4.5342	1.73339	0.291521	1.45755	0.840865	1649.13	21.2086	1737.27	14.4212	1845.08	16.9752	1845.08	16.9752	89.3799
101517AL2-191	439.123	321957	2.27449	12.6164	0.710332	2.19228	1.18862	0.200687	0.95302	0.801786	1179.01	10.2686	1178.59	8.28853	1177.84	14.0649	1177.84	14.0649	100.099
101517AL2-192	417.47	6004.99	1.17755	15.428	4.21602	0.138259	4.36138	0.0154771	1.11659	0.256018	99.0078	1.09707	131.492	5.37911	767.473	88.8373	99.0078	1.09707	NA
101517AL2-193	754.029	48961.9	2.77997	19.0926	1.00285	0.123804	1.48571	0.0171508	1.09619	0.737822	109.624	1.19153	118.514	1.6619	300.906	22.8647	109.624	1.19153	NA
101517AL2-194	282.807	12500.6	2.35783	15.5556	2.75281	0.0385433	3.03783	0.00435034	1.28468	0.422896	27.9833	0.358717	38.4008	1.14477	750.101	58.1543	27.9833	0.358717	NA
101517AL2-195	424.848	215591	2.59712	17.9253	0.717619	0.536743	1.15522	0.0698102	0.905289	0.783653	435.012	3.80818	436.275	4.09695	442.922	15.9698	435.012	3.80818	98.2143
101517AL2-196	1719.13	20894.9	1.28629	20.035	1.01363	0.106817	1.27668	0.0155281	0.776189	0.607973	99.3311	0.765087	103.049	1.25106	189.933	23.6049	99.3311	0.765087	NA
101517AL2-198	687.628	229731	41.5993	5.47025	0.550095	10.9458	1.1384	0.434451	0.996674	0.875501	2325.75	19.4593	2518.53	10.5919	2677.77	9.10277	2677.77	9.10277	86.854
101517AL2-199	68.2753	36554.4	1.6812	2.99283	0.49322	33.7915	1.1874	0.733799	1.08012	0.909649	3547.56	29.4693	3603.97	11.7106	3635.47	7.55183	3635.47	7.55183	97.5817
101517AL2-202	475.974	256466	3.59356	12.7345	0.509921	2.14839	1.02965	0.198511	0.894515	0.868757	1167.31	9.55098	1164.53	7.13429	1159.35	10.1297	1159.35	10.1297	100.687
101517AL2-203	329.183	6642.39	2.55827	16.4661	2.15742	0.130208	2.46178	0.0155566	1.18572	0.48165	99.5122	1.17087	124.284	2.87978	628.758	46.5049	99.5122	1.17087	NA
101517AL2-205	785.741	99359.2	1.58692	20.7798	1.04972	0.0963792	1.41258	0.0145315	0.945233	0.669156	93.0022	0.872777	93.4286	1.26085	104.307	24.8244	93.0022	0.872777	NA
101517AL2-206	864.491	21189.1	11.8994	18.2708	1.11274	0.166965	1.6454	0.0221346	1.21209	0.736653	141.133	1.69207	156.782	2.3904	400.297	24.9315	141.133	1.69207	NA
101517AL2-208	81.0329	2480.8	2.08383	9.26605	2.87664	0.443459	3.04991	0.029815	1.01336	0.332258	189.391	1.89128	372.688	9.51433	1763.8	52.5826	189.391	1.89128	NA
101517AL2-209	82.008	150853	2.65409	11.4831	0.66931	2.68209	1.17747	0.223471	0.968739	0.822731	1300.19	11.4065	1323.53	8.70901	1361.5	12.896	1361.5	12.896	95.4968
101517AL2-211	173.475	55163.6	0.455339	14.0352	0.686991	1.57363	1.08653	0.160253	0.841776	0.774739	958.185	7.49496	959.858	6.7458	963.71	14.0294	963.71	14.0294	99.4267
101517AL2-212	305.112	111952	2.90601	12.8459	0.758137	2.01869	1.39737	0.188157	1.17383	0.840026	1111.38	11.9831	1121.82	9.48865	1142.06	15.0557	1142.06	15.0557	97.3135
101517AL2-213	1021.51	73927.6	2.50298	18.8541	1.38656	0.077748	1.7022	0.0106361	0.987393	0.580068	68.2028	0.66988	76.0254	1.24685	329.446	31.4586	68.2028	0.66988	NA
101517AL2-215	23.8827	58181.4	1.06477	8.4031	0.880367	5.35387	1.40888	0.326434	1.09995	0.780727	1821.07	17.4502	1877.51	12.0546	1940.52	15.748	1940.52	15.748	93.8444
101517AL2-216	672.596	280414	0.644978	8.13701	0.633794	5.80092	1.37558	0.342491	1.22087	0.887531	1898.64	20.0783	1946.55	11.9142	1997.89	11.2607	1997.89	11.2607	95.0323
101517AL2-217	37.5301	18140.5	1.45964	13.316	1.24299	1.87266	1.60678	0.180934	1.01819	0.633683	1072.08	10.0564	1071.47	10.6359	1070.26	24.9706	1070.26	24.9706	100.17
101517AL2-219	74.3402	12622.5	1.35856	11.5047	0.988826	2.22024	1.37826	0.185337	0.96012	0.696616	1096.06	9.67751	1187.44	9.64909	1357.89	19.0627	1357.89	19.0627	80.7182
101517AL2-220	98.7026	309819	1.61591	8.55598	0.673201	5.54095	1.20678	0.343987	1.00156	0.829942	1905.82	16.525	1906.97	10.3804	1908.21	12.0898	1908.21	12.0898	99.8747
101517AL2-221	395.442	217898	3.56661	12.392	0.660126	2.32067	1.37101	0.208661	1.20162	0.876452	1221.68	13.3728	1218.63	9.72904	1213.24	12.9893	1213.24	12.9893	100.695
101517AL2-222	842.435	29494	2.47876	10.3044	1.37128	2.92048	1.60242	0.218355	0.829058	0.517378	1273.18	9.57841	1387.23	12.1211	1567.27	25.6981	1567.27	25.6981	81.2352
101517AL2-223	111.5	30767.5	132.957	7.84197	0.553613	6.33979	1.15888	0.360735	1.01809	0.878514	1985.66	17.3988	2023.97	10.1642	2063.27	9.76427	2063.27	9.76427	96.2383
101517AL2-224	504.699	28412.3	2.44811	20.2071	1.00896	0.222458	1.42164	0.0326167	1.00153	0.70449	206.904	2.03932	203.953	2.62685	169.951	23.5599	206.904	2.03932	NA
101517AL2-225	513.859	541636	1.55819	13.3364	0.644788	1.84546	1.18731	0.178579	0.99697	0.839689	1059.21	9.73805	1061.81	7.81905	1067.18	12.9528	1067.18	12.9528	99.2524
101517AL2-226	79.5049	16234.2	2.54539	17.7465	1.36652	0.504221	1.75171	0.0649264	1.09595	0.625644	405.516	4.30733	414.555	5.96219	465.186	30.2842	405.516	4.30733	87.1729
101517AL2-227	421.036	17675.6	3.73213	20.1566	1.00017	0.125989	1.34852	0.0184263	0.904536	0.67076	117.703	1.055	120.487	1.5321	175.792	23.3308	117.703	1.055	NA
101517AL2-228	277.63	10748.3	1.85267	19.9474	1.14622	0.17964	1.58331	0.0260002	1.09227	0.689864	165.466	1.78433	167.751	2.44822	200.127	26.6233	165.466	1.78433	NA
101517AL2-229	377.185	800003	2.80842	5.04656	0.889572	14.8715	1.31398	0.544551	0.967055	0.735976	2802.47	21.979	2807.05	12.5019	2810.34	14.5418	2810.34	14.5418	99.7201
101517AL2-230	204.719	91366.9	1.54245	8.83976	0.703126	5.02373	1.04654	0.322222	0.775146	0.740678	1800.57	12.1774	1823.33	8.8625	1849.41	12.7148	1849.41	12.7148	97.3589
101517AL2-231	1131.88	94461.3	2.71339	19.5876	0.757432	0.184789	1.08654	0.026263	0.77902	0.716971	167.117	1.28515	172.173	1.72073	242.19	17.4616	167.117	1.28515	NA
101517AL2-232	237.283	275807	2.67709	9.21898	0.645462	4.84635	1.18164	0.324179	0.989767	0.837625	1810.11	15.6203	1792.98	9.9462	1773.1	11.7815	1773.1	11.7815	102.087
101517AL2-234	192.867	1.68091e+06	2.9806	8.66126	0.604071	5.36904	1.1632	0.337416	0.994051	0.854582	1874.23	16.1669	1879.93	9.95684	1886.22	10.8749	1886.22	10.8749	99.3639
101517AL2-235	50.081	50717.7	0.77508	5.47478	0.749721	11.9753	1.28314	0.475709	1.04134	0.811549	2508.55	21.6397	2602.48	12.0253	2676.4	12.4045	2676.4	12.4045	93.7285
101517AL2-236	618.382	86722.3	1.74453	18.0555	0.881022	0.392345	1.19424	0.0514002	0.806225	0.675097	323.113	2.54081	336.081	3.41698	426.796	19.6487	323.113	2.54081	NA
101517AL2-237	129.223	307499	1.57248	12.8432	0.750935	1.92853	1.37466	0.179716	1.15143	0.83761	1065.42	11.3075	1091.03	9.1921	1142.51	14.9294	1142.51	14.9294	93.253
101517AL2-238	377.048	29623.4	1.67386	19.0402	1.16646	0.188497	1.57508	0.0260414	1.05842	0.671977	165.725	1.7317	175.346	2.53652	307.141	26.5478	165.725	1.7317	NA
101517AL2-239	697.966	179804	1.54332	20.7086	0.77615	0.0976061	1.20612	0.0146661	0.923216	0.76544	93.8574	0.860229	94.5642	1.08906	112.44	18.3043	93.8574	0.860229	NA
101517AL2-240	210.096	214727	2.18775	9.37469	0.682191	4.18404	1.21257	0.284603	1.00247	0.826729	1614.5	14.3172	1670.9	9.93751	1742.47	12.4996	1742.47	12.4996	92.6563
101517AL2-242	154.775	87996.5	0.547398	9.97941	0.681283	3.74336	1.41107	0.271053	1.23571	0.875725	1546.15	16.9874	1580.69	11.3077	1627.09	12.6672	1627.09	12.6672	95.0253
101517AL2-243	224.837	128638	2.42895	9.3596	0.5003	4.47246	0.898106	0.303733	0.745852	0.830472	1709.79	11.2015	1725.88	7.45297	1745.42	9.16297	1745.42	9.16297	97.959
101517AL2-244	54.2887	28875.7	1.19456	12.4632	0.790235	1.88866	1.08046	0.170794	0.736831	0.681961	1016.49	6.92912	1077.11	7.17303	1201.92	15.5656	1201.92	15.5656	84.572
101517AL2-245	624.756	236931	1.14447	9.78719	0.602018	3.91478	0.998945	0.278005	0.797161	0.798003	1581.31	11.1785	1616.74	8.07949	1663.17	11.1414	1663.17	11.1414	95.0779
101517AL2-246	207.029	94633.8	3.4015	12.7117	0.617152	2.12359	1.13693	0.195867	0.954848	0.839847	1153.08	10.0817	1156.5	7.84854	1162.9	12.2508	1162.9	12.2508	99.1557
101517AL2-247	1567.6	92036.6	2.66433	19.6362	0.711546	0.122915	1.08943	0.0175126	0.824963	0.757241	111.916	0.915299	117.711	1.21084	236.491	16.4011	111.916	0.915299	NA
101517AL2-248	377.356	165572	1.84947	13.5502	0.653356	1.76652	1.18123	0.173681	0.984091	0.833105	1032.36	9.38764	1033.24	7.65875	1035.09	13.2169	1035.09	13.2169	99.7366
101517AL2-249	96.0882	33578.1	1.05127	9.80514	0.611676	3.99124	1.13614	0.283955	0.957425	0.842701	1611.25	13.6497	1632.42	9.22513	1659.78	11.3251	1659.78	11.3251	97.076
101517AL2-250	123.785	65606.7	1.48076	11.3846	0.585604	2.94307	1.0985	0.243112	0.929392	0.846056	1402.85	11.7169	1393.07	8.32541	1378.09	11.2565	1378.09	11.2565	101.797
101517AL2-252	187.255	335246	1.49024	5.57444	0.668308	11.9757	1.25179	0.484382	1.05847	0.84556	2546.33	22.2659	2602.5	11.7315	2646.5	11.0888	2646.5	11.0888	96.2147
101517AL2-253	385.195	61661.6	3.10654	17.5504	0.923216	0.522144	1.45279	0.0664913	1.12173	0.77212	414.982	4.50832	426.583	5.06025	489.755	20.3665	414.982	4.50832	84.7327
101517AL2-254	269.753	103929	2.23437	9.11456	0.622048	4.72086	0.935291	0.312209	0.698446	0.746768	1751.57	10.7126	1770.95	7.83692	1793.86	11.3269	1793.86	11.3269	97.6421
101517AL2-255	428.033	53426.1	2.93705	13.0986	0.631991	1.80623	1.07439	0.171667	0.868846	0.80869	1021.29	8.20624	1047.72	7.02178	1103.25	12.6556	1103.25	12.6556	92.5709
101517AL2-257	589.57	269455	4.16378	10.0902	0.484622	3.3834	1.14833	0.247709	1.04106	0.906585	1426.65	13.3236	1500.56	9.00015	1606.53	9.03572	1606.53	9.03572	88.8031
101517AL2-260	6979.16	32836.1	2.55323	19.7071	1.17816	0.0262367	1.51025	0.00375163	0.944873	0.62564	24.1393	0.227659	26.2968	0.392049	228.18	27.2083	24.1393	0.227659	NA
101517AL2-261	614.428	1.50951e+06	2.42078	12.4603	0.584444	2.28327	1.15911	0.206431	1.00098	0.863576	1209.78	11.0412	1207.13	8.18491	1202.38	11.5172	1202.38	11.5172	100.615
101517AL2-262	156.682	3244.83	1.2418	23.6977	3.08978	0.066665	3.28711	0.0114628	1.12175	0.341258	73.4739	0.819516	65.5297	2.086	NA	NA	73.4739	0.819516	NA
101517AL2-264	56.2327	5197.83	1.15485	7.85815	1.93587	5.17016	2.20954	0.294789	1.06511	0.482049	1665.42	15.6324	1847.72	18.8013	2059.63	34.1568	2059.63	34.1568	80.8601
101517AL2-265	397.491	432087	1.65714	9.95538	0.660522	3.92032	1.2113	0.283183	1.01537	0.838242	1607.37	14.4451	1617.88	9.79997	1631.57	12.274	1631.57	12.274	98.5168
101517AL2-266	1033.71	445729	19.0406	9.63645	0.527483	3.50638	1.10431	0.245168	0.970189	0.878546	1413.51	12.3143	1528.65	8.72496	1691.85	9.72794	1691.85	9.72794	83.5483
101517AL2-267	217.486	998073	1.86516	17.6169	0.896658	0.534086	1.39825	0.0682696	1.0729	0.767315	425.722	4.42001	434.518	4.94288	481.429	19.8088	425.722	4.42001	88.4289
101517AL2-268	341.28	97430.2	1.32025	16.3115	0.706993	0.76218	1.18135	0.090207	0.946444	0.801152	556.761	5.0483	575.267	5.18825	649.082	15.182	556.761	5.0483	85.7767
101517AL2-269	437.429	390073	1.86832	5.89009	0.475727	10.6157	1.14391	0.453688	1.04029	0.90942	2411.63	20.9296	2490.08	10.6155	2554.7	7.96293	2554.7	7.96293	94.3997
101517AL2-270	734.99	198793	3.66543	20.1982	1.01342	0.120609	1.50138	0.0176759	1.10775	0.737825	112.951	1.24032	115.624	1.64077	170.984	23.6726	112.951	1.24032	NA
101517AL2-271	109.433	110875	1.41185	10.9172	0.575179	3.05164	1.16176	0.24173	1.00938	0.868839	1395.69	12.6671	1420.64	8.88501	1458.23	10.9365	1458.23	10.9365	95.7107
101517AL2-272	165.496	164709	1.58339	9.09218	0.712852	4.6453	1.35211	0.306457	1.14893	0.849731	1723.25	17.3734	1757.45	11.2976	1798.34	12.9732	1798.34	12.9732	95.8244
101517AL2-273	574.075	3.94009e+06	6.51608	9.97562	0.568458	3.32896	1.22172	0.240955	1.08142	0.885157	1391.66	13.536	1487.87	9.53981	1627.8	10.5681	1627.8	10.5681	85.4935
101517AL2-274	180.585	129404	0.957014	10.162	0.623947	3.54933	1.08221	0.261707	0.884235	0.817063	1498.57	11.8234	1538.29	8.57336	1593.29	11.6535	1593.29	11.6535	94.0548
101517AL2-276	276.554	63061.6	2.77866	20.1867	1.11137	0.180069	1.58983	0.0263749	1.13685	0.715076	167.82	1.88325	168.12	2.46328	172.316	25.9408	167.82	1.88325	NA
101517AL2-277	54.7291	97057.8	0.546374	5.34144	0.668426	12.9973	1.17206	0.503732	0.962777	0.821438	2629.82	20.791	2679.46	11.0511	2717.12	11.0203	2717.12	11.0203	96.7867
101517AL2-278	431.547	96421.6	1.79738	17.5263	0.683126	0.589517	1.0871	0.0749677	0.845647	0.777895	466.015	3.80177	470.559	4.09385	492.77	15.0634	466.015	3.80177	94.5704
101517AL2-279	105.95	70983.7	1.60868	6.82395	0.507421	8.85285	0.959049	0.438335	0.813817	0.848567	2343.18	15.9879	2322.95	8.74989	2305.2	8.71265	2305.2	8.71265	101.648
101517AL2-280	703.898	653951	3.69441	5.54754	0.53513	11.0454	1.16	0.444598	1.02919	0.887234	2371.19	20.4191	2526.96	10.801	2654.53	8.87491	2654.53	8.87491	89.3263
101517AL2-281	89.7449	45362.3	2.0224	13.2506	0.88787	1.88768	1.41194	0.181489	1.09785	0.777544	1075.11	10.8713	1076.77	9.37215	1080.14	17.7979	1080.14	17.7979	99.5341
101517AL2-282	238.504	4906.02	1.85595	16.4959	4.10784	0.0323059	4.22528	0.00386674	0.989259	0.234128	24.8786	0.245639	32.2842	1.34264	624.862	88.5861	24.8786	0.245639	NA
101517AL2-284	163.77	1601.21	4.24636	6.01237	5.81704	0.427338	5.90466	0.0186425	1.01344	0.171634	119.071	1.19564	361.284	17.9521	2520.24	97.8138	119.071	1.19564	NA
101517AL2-285	249.581	128684	4.12396	12.2341	0.747718	2.02989	3.07802	0.180191	2.98582	0.970046	1068.02	29.3877	1125.58	20.9415	1238.39	14.6773	1238.39	14.6773	86.2424
101517AL2-286	499.132	7629.77	1.5753	19.2464	1.20662	0.0971538	1.57345	0.0135674	1.00986	0.64181	86.8733	0.87141	94.1457	1.41474	282.574	27.623	86.8733	0.87141	NA
101517AL2-287	78.0877	70197.4	3.98752	10.5789	0.613495	3.39937	1.25981	0.260932	1.10034	0.873416	1494.61	14.6785	1504.25	9.88454	1517.84	11.5709	1517.84	11.5709	98.4691
101517AL2-288	312.826	205739	3.14011	8.48052	0.680342	5.22192	1.4828	0.321322	1.31751	0.888528	1796.18	20.6541	1856.2	12.6369	1924.1	12.193	1924.1	12.193	93.3516
101517AL2-289	59.176	477462	0.325475	8.08904	0.746968	5.90085	1.07813	0.346337	0.777428	0.721092	1917.08	12.8921	1961.36	9.36103	2008.39	13.2558	2008.39	13.2558	95.4538
101517AL2-290	298.124	123863	1.09224	9.49541	0.578934	3.85447	1.10923	0.265562	0.946167	0.852992	1518.24	12.7988	1604.2	8.94307	1718.99	10.6404	1718.99	10.6404	88.3215
101517AL2-291	393.725	96216	8.59693	10.8881	0.617663	3.0828	1.24043	0.243549	1.07571	0.86721	1405.12	13.5812	1428.42	9.51047	1463.3	11.7363	1463.3	11.7363	96.0244
101517AL2-292	596.213	887869	3.74835	10.782	0.550828	2.8141	1.06255	0.220154	0.908624	0.855137	1282.69	10.5685	1359.3	7.9604	1481.89	10.4402	1481.89	10.4402	86.5578
101517AL2-293	317.991	350729	1.87746	10.2912	0.524476	3.6318	1.07368	0.271192	0.936866	0.872573	1546.85	12.8843	1556.53	8.54846	1569.67	9.82427	1569.67	9.82427	98.5463
101517AL2-294	407.164	175973	2.36501	17.1042	1.36464	0.0866566	1.72174	0.0107546	1.04983	0.60975	68.9583	0.720087	84.3841	1.39414	546.262	29.8365	68.9583	0.720087	NA
101517AL2-295	398.919	2.97339e+06	3.64899	9.49702	0.811195	4.46878	1.38037	0.307938	1.11686	0.809104	1730.55	16.951	1725.19	11.4536	1718.68	14.9099	1718.68	14.9099	100.691
101517AL2-296	922.034	17465.5	1.07434	17.7905	1.2619	0.118681	1.6033	0.01532	0.989039	0.616876	98.0103	0.962028	113.876	1.72712	459.718	27.9823	98.0103	0.962028	NA
101517AL2-297	1113.58	62925.3	3.76575	21.2132	0.980198	0.0706326	1.31688	0.0108718	0.879421	0.667807	69.7056	0.609704	69.2996	0.882147	55.3231	23.3638	69.7056	0.609704	NA
101517AL2-298	192.347	40237.4	3.16645	11.1352	0.910101	2.95929	1.30736	0.239097	0.938571	0.717911	1382	11.675	1397.23	9.92225	1420.54	17.3933	1420.54	17.3933	97.2875
101517AL2-299	92.0358	77410.5	3.63869	9.03224	0.559371	4.85604	0.997358	0.318248	0.825728	0.827916	1781.17	12.8506	1794.66	8.39787	1810.37	10.163	1810.37	10.163	98.387
101517AL2-301	238.443	39249.5	1.21589	7.65498	0.565431	6.69582	1.08566	0.371908	0.926791	0.853667	2038.37	16.1962	2072.07	9.59146	2105.73	9.92276	2105.73	9.92276	96.8015
101517AL2-302	182.05	430609	3.07833	12.8007	0.736489	2.02422	1.14013	0.188009	0.870328	0.763361	1110.58	8.87892	1123.68	7.74882	1149.07	14.6083	1149.07	14.6083	96.6507
101517AL2-303	502.67	91777	2.93357	12.8859	0.705193	2.08786	1.73122	0.195211	1.58109	0.913277	1149.54	16.6469	1144.82	11.8863	1135.91	14.0145	1135.91	14.0145	101.201
101517AL2-304	83.8039	98647.3	1.23306	16.7844	1.13141	0.782269	1.48729	0.0952688	0.965366	0.649079	586.623	5.41303	586.777	6.62847	587.352	24.5484	586.623	5.41303	99.8758
101517AL2-306	580.748	1783.23	2.57542	7.12946	3.796	0.353998	3.88275	0.0183124	0.816166	0.210203	116.981	0.946151	307.723	10.3078	2229.69	65.7443	116.981	0.946151	NA
101517AL2-307	570.33	313365	4.99199	9.62247	0.5517	3.90906	1.16244	0.272927	1.02318	0.880198	1555.64	14.1421	1615.56	9.39909	1694.52	10.1694	1694.52	10.1694	91.8043
101517AL2-308	128.272	2.37766e+06	1.95879	5.33918	0.571824	12.8188	0.950728	0.496601	0.75954	0.798904	2599.17	16.2469	2666.42	8.95518	2717.82	9.42702	2717.82	9.42702	95.6345
101517AL2-309	434.566	429875	2.75595	9.19537	0.465699	4.74556	1.26327	0.316624	1.1743	0.92957	1773.22	18.2046	1775.32	10.5949	1777.78	8.49486	1777.78	8.49486	99.7437
101517AL2-310	357.991	191240	3.55179	10.4715	0.854991	2.9447	1.42935	0.223736	1.14544	0.801372	1301.59	13.5003	1393.49	10.8346	1537.07	16.0854	1537.07	16.0854	84.6797
101517AL2-311	224.23	74105.4	1.3718	11.6596	0.833049	2.55529	1.41003	0.216178	1.13763	0.806816	1261.65	13.0357	1287.95	10.2905	1332.07	16.1163	1332.07	16.1163	94.7134
101517AL2-312	120.927	90693	3.10998	12.8881	0.718326	2.05509	1.12096	0.19218	0.860559	0.767697	1133.17	8.94262	1133.99	7.6566	1135.58	14.279	1135.58	14.279	99.7884
101517AL2-314	290.735	84963.1	3.71772	13.3265	0.658084	1.82706	1.12632	0.176667	0.914072	0.811555	1048.74	8.84711	1055.23	7.39126	1068.68	13.227	1068.68	13.227	98.1342

## Sheet: 101517AL3
U/Pb detrital zircon geochronologic analyses by LA-ICP-MS analysis
	Isotope Ratios										Apparent Ages (Ma)
Analysis	U	206Pb	U/Th	206Pb*	± 1σ	207Pb*	± 1σ	206Pb*	± 1σ	error	206Pb*	± 1σ	207Pb*	± 1σ	206Pb*	± 1σ	Best Age	± 1σ	% conc
	(ppm)	204Pb		207Pb*	(%)	235U	(%)	238U	(%)	corr.	238U	(Ma)	235U	(Ma)	207Pb*	(Ma)	(Ma)	(Ma)
Sample 101517AL3: (Lat/Long: 46.4728, -112.925)--NAD 1983 coordinate system
101517AL3-0	280.446	253638	2.38468	11.482	0.718776	2.84741	1.41824	0.237223	1.22261	0.862059	1372.24	15.1118	1368.13	10.6581	1361.69	13.8487	1361.69	13.8487	100.775
101517AL3-2	813.779	51836	1.68152	17.9296	2.0853	0.0315847	2.48145	0.00410899	1.34503	0.542035	26.434	0.354817	31.5745	0.771448	442.38	46.393	26.434	0.354817	NA
101517AL3-4	2440.34	24559.4	31.6402	18.339	2.07358	0.0809767	2.57606	0.0107752	1.5285	0.59335	69.0897	1.0504	79.0628	1.95943	391.945	46.5306	69.0897	1.0504	NA
101517AL3-5	440.288	89815.7	3.68849	14.1199	0.691506	1.59633	1.38751	0.163547	1.20291	0.866959	976.459	10.8996	968.776	8.66241	951.402	14.1482	951.402	14.1482	102.634
101517AL3-6	1690.09	99608.9	3.26516	11.5682	1.8986	0.227953	2.36344	0.0191337	1.40754	0.595546	122.179	1.70352	208.507	4.45492	1347.26	36.6564	122.179	1.70352	NA
101517AL3-7	487.514	131488	2.15195	9.59819	0.524026	4.56524	1.28062	0.317936	1.16849	0.912446	1779.64	18.1716	1742.95	10.6671	1699.18	9.6535	1699.18	9.6535	104.735
101517AL3-8	307.017	36958.7	5.21227	19.8321	1.35738	0.135559	1.71943	0.0195068	1.05544	0.613834	124.538	1.30181	129.081	2.08418	213.567	31.4611	124.538	1.30181	NA
101517AL3-9	141.181	116025	2.14434	9.45019	0.702882	4.49366	1.27679	0.308127	1.0659	0.83483	1731.48	16.1851	1729.8	10.6048	1727.76	12.9043	1727.76	12.9043	100.216
101517AL3-10	288.836	351629	1.11075	5.59575	0.59034	12.7322	1.17294	0.516949	1.01356	0.864113	2686.23	22.2661	2660.04	11.043	2640.17	9.80057	2640.17	9.80057	101.744
101517AL3-11	111.785	126268	2.16982	6.16906	0.611285	10.3805	1.37283	0.464649	1.22923	0.895395	2460.05	25.1388	2469.31	12.7153	2476.92	10.3151	2476.92	10.3151	99.3188
101517AL3-12	2591.26	64403.2	1.88522	20.446	0.845984	0.0694419	1.16149	0.0103019	0.795852	0.685197	66.0705	0.523138	68.1697	0.765793	142.489	19.8552	66.0705	0.523138	NA
101517AL3-13	88.2926	17886.4	0.864141	13.3459	0.774642	1.93883	1.44847	0.187749	1.22392	0.844978	1109.17	12.4717	1094.6	9.70326	1065.75	15.5573	1065.75	15.5573	104.075
101517AL3-14	261.478	93493.8	3.56478	9.424	0.450683	4.43267	0.970145	0.303102	0.859108	0.885546	1706.67	12.8818	1718.47	8.03762	1732.85	8.26876	1732.85	8.26876	98.4893
101517AL3-16	1165.41	1.78574e+06	2.033	11.7047	0.563119	2.40274	1.11025	0.204058	0.956845	0.861828	1197.08	10.4536	1243.42	7.96044	1324.59	10.9059	1324.59	10.9059	90.3736
101517AL3-17	257.444	108504	2.40038	17.5496	0.869987	0.547256	1.41557	0.0696859	1.11667	0.788851	434.263	4.68957	443.198	5.08385	489.864	19.1819	434.263	4.68957	88.6497
101517AL3-18	2563.23	43216.1	2.72138	20.4659	0.661305	0.0765635	1.47636	0.0113695	1.31997	0.89407	72.8788	0.956563	74.9089	1.06612	140.158	15.5383	72.8788	0.956563	NA
101517AL3-20	1552.38	17066.9	2.48853	20.4256	1.15745	0.0729809	1.50989	0.0108162	0.969572	0.642148	69.351	0.668804	71.5243	1.04278	144.78	27.1532	69.351	0.668804	NA
101517AL3-21	149.111	124373	1.42626	9.92094	0.699655	4.03234	1.1795	0.290267	0.949578	0.80507	1642.86	13.7711	1640.74	9.59682	1638.01	12.9922	1638.01	12.9922	100.296
101517AL3-23	294.845	110595	2.53677	13.4564	0.675874	1.78847	1.29382	0.174622	1.10326	0.85271	1037.53	10.5729	1041.27	8.42618	1049.15	13.643	1049.15	13.643	98.8921
101517AL3-24	40.9888	267669	0.898666	6.68869	0.819423	8.58995	1.51059	0.416888	1.26903	0.840087	2246.34	24.0699	2295.49	13.7397	2339.53	14.0207	2339.53	14.0207	96.0166
101517AL3-26	80.4129	13378.7	1.87582	13.2426	0.988717	1.66002	1.60717	0.159505	1.26705	0.788377	954.024	11.2361	993.384	10.1844	1081.33	19.83	1081.33	19.83	88.2272
101517AL3-29	502.825	28352.4	2.53507	20.5381	1.74862	0.0719618	2.05102	0.0107238	1.07191	0.522623	68.7622	0.733152	70.5594	1.39805	131.93	41.1085	68.7622	0.733152	NA
101517AL3-30	521.657	13421	0.927453	20.6189	1.60551	0.0712467	1.86919	0.0106591	0.957181	0.512085	68.3491	0.650769	69.8818	1.26229	122.637	37.821	68.3491	0.650769	NA
101517AL3-31	962.969	158911	1.52881	19.7952	0.852246	0.180351	1.53432	0.0259039	1.27586	0.831547	164.861	2.07673	168.362	2.38043	217.884	19.7052	164.861	2.07673	NA
101517AL3-32	201.784	26278	0.834813	12.7815	1.17075	2.02956	1.42251	0.188222	0.808016	0.56802	1111.74	8.25111	1125.47	9.67658	1152.04	23.2424	1152.04	23.2424	96.5014
101517AL3-33	1495.68	20374.3	2.04873	20.7354	1.02581	0.0722216	1.39883	0.0108659	0.951021	0.679869	69.6684	0.658993	70.8054	0.956703	109.404	24.2119	69.6684	0.658993	NA
101517AL3-34	331.928	221084	2.24457	11.4895	0.694239	2.57591	2.29121	0.214744	2.1835	0.95299	1254.04	24.8834	1293.82	16.7601	1360.43	13.3783	1360.43	13.3783	92.1801
101517AL3-35	1008.6	81451.8	2.20151	18.5466	0.531538	0.415439	1.00735	0.0559062	0.855699	0.849456	350.681	2.92061	352.785	3.00212	366.63	11.9749	350.681	2.92061	NA
101517AL3-36	406.981	34706.1	1.63513	19.874	1.22471	0.178609	1.68188	0.0257559	1.15274	0.685386	163.931	1.86587	166.863	2.58797	208.649	28.4191	163.931	1.86587	NA
101517AL3-37	506.387	149064	0.781842	10.1123	0.534297	3.93484	1.04797	0.288711	0.901537	0.860269	1635.08	13.02	1620.88	8.48483	1602.46	9.96719	1602.46	9.96719	102.036
101517AL3-38	2440.94	66548.7	2.80744	20.5797	0.705958	0.0712602	1.18361	0.0106408	0.95003	0.802654	68.2324	0.64481	69.8946	0.799449	127.173	16.6196	68.2324	0.64481	NA
101517AL3-39	1205.81	124961	1.52682	17.4215	0.805956	0.562396	1.49173	0.071091	1.25527	0.841484	442.726	5.37086	453.085	5.45226	505.992	17.7164	442.726	5.37086	87.4966
101517AL3-40	376.378	232075	2.14636	13.0399	0.589983	2.06928	1.20304	0.195787	1.04844	0.871492	1152.65	11.066	1138.7	8.23574	1112.19	11.7739	1112.19	11.7739	103.638
101517AL3-41	260.098	48886.3	1.29726	11.4457	0.606264	2.7313	1.33719	0.22683	1.19185	0.891314	1317.86	14.2055	1337.01	9.93906	1367.79	11.6714	1367.79	11.6714	96.3495
101517AL3-42	2597.76	44264.4	1.50962	20.652	1.53684	0.0694178	1.91998	0.0104021	1.15084	0.599402	66.7097	0.763764	68.1468	1.26547	118.867	36.2288	66.7097	0.763764	NA
101517AL3-43	57.0705	41380.1	1.17222	10.7903	1.41649	2.79592	1.82117	0.2189	1.14466	0.628527	1276.06	13.2517	1354.45	13.6212	1480.43	26.8541	1480.43	26.8541	86.1955
101517AL3-44	235.504	133974	1.96081	5.49995	0.515175	12.5743	1.05304	0.501801	0.918412	0.872156	2621.53	19.7823	2648.3	9.90498	2668.81	8.53223	2668.81	8.53223	98.2286
101517AL3-45	385.853	52098.6	1.71466	17.7222	0.940233	0.52787	1.66301	0.0678783	1.3717	0.824829	423.36	5.62063	430.395	5.83403	468.225	20.8234	423.36	5.62063	90.4182
101517AL3-46	386.433	61304.3	1.45805	16.8258	0.806798	0.749737	1.31853	0.0915317	1.04288	0.790941	564.589	5.63752	568.072	5.73668	582.058	17.5208	564.589	5.63752	96.9988
101517AL3-47	2918.1	45261.1	2.51104	20.8583	0.783304	0.0673816	1.46502	0.0101978	1.23803	0.84506	65.4064	0.805658	66.2117	0.939065	95.4298	18.559	65.4064	0.805658	NA
101517AL3-48	396.444	77527.5	1.30175	16.3725	0.743489	0.863234	1.40625	0.102549	1.19364	0.848808	629.33	7.15691	631.887	6.61548	641.065	15.989	629.33	7.15691	98.1694
101517AL3-49	190.516	72992.3	1.14199	10.3911	0.657456	3.35615	1.55077	0.253039	1.40451	0.905683	1454.13	18.2838	1494.23	12.1321	1551.56	12.3466	1551.56	12.3466	93.7205
101517AL3-50	447.472	212286	4.47051	9.72783	0.626342	4.23082	1.22348	0.298627	1.051	0.859025	1684.49	15.58	1680.02	10.0484	1674.42	11.5751	1674.42	11.5751	100.602
101517AL3-51	33.3808	15644.9	15.9001	9.41901	0.988718	4.3164	1.54686	0.294995	1.18962	0.769058	1666.44	17.4693	1696.5	12.7528	1733.82	18.1366	1733.82	18.1366	96.1138
101517AL3-53	136.856	33548.7	3.52871	12.415	0.889828	2.13853	1.19391	0.192642	0.796011	0.666724	1135.67	8.28853	1161.35	8.2604	1209.57	17.5283	1209.57	17.5283	93.8905
101517AL3-56	84.8517	14617.9	0.495519	12.925	0.851049	1.92566	1.39515	0.180592	1.10552	0.792399	1070.21	10.9014	1090.03	9.32438	1129.85	16.9506	1129.85	16.9506	94.7214
101517AL3-57	155.97	819320	0.611706	5.34036	0.494284	13.1702	0.89343	0.510328	0.744245	0.83302	2658.03	16.2111	2691.92	8.43173	2717.46	8.14896	2717.46	8.14896	97.8132
101517AL3-58	72.2397	9745.19	2.73473	16.0327	1.27354	0.87546	1.63422	0.101843	1.0241	0.626657	625.201	6.10198	638.528	7.74601	685.993	27.1759	625.201	6.10198	91.1382
101517AL3-59	280.194	291227	1.62971	2.77581	0.507509	38.921	1.02859	0.783901	0.894667	0.869801	3731.2	25.3438	3743.62	10.1828	3750.27	7.70836	3750.27	7.70836	99.4915
101517AL3-61	873.676	414237	4.32054	9.64549	0.625607	4.30435	1.48688	0.301245	1.34886	0.907176	1697.48	20.1302	1694.19	12.2519	1690.12	11.5401	1690.12	11.5401	100.436
101517AL3-62	57.0871	71431.2	2.36172	11.93	0.885517	2.42576	1.5479	0.209979	1.26958	0.820199	1228.71	14.203	1250.26	11.1296	1287.56	17.2207	1287.56	17.2207	95.4289
101517AL3-63	1928.93	429131	5.28976	18.1094	0.608347	0.489509	1.13343	0.0643209	0.956335	0.843753	401.849	3.7257	404.576	3.7822	420.151	13.5831	401.849	3.7257	95.6442
101517AL3-64	393.157	101539	8.50848	13.4412	0.565025	1.71463	1.11097	0.167223	0.956555	0.86101	996.792	8.83426	1014.02	7.12521	1051.43	11.4054	1051.43	11.4054	94.8039
101517AL3-65	736.715	2.41215e+06	1.23617	4.30845	0.546083	19.0059	1.13219	0.594153	0.991789	0.875992	3006.24	23.8291	3042.12	10.9218	3065.89	8.73117	3065.89	8.73117	98.0543
101517AL3-66	513.781	98242.7	2.17988	19.4357	1.16671	0.17285	1.57614	0.0243757	1.05972	0.672353	155.251	1.62558	161.889	2.35859	260.137	26.8	155.251	1.62558	NA
101517AL3-67	620.369	106285	2.16041	18.0056	0.681815	0.501646	1.01945	0.0655378	0.757894	0.743435	409.216	3.00503	412.816	3.45801	432.971	15.1893	409.216	3.00503	94.5134
101517AL3-69	314.78	117212	2.05721	5.2564	0.686975	11.4885	1.16908	0.438167	0.945951	0.809138	2342.43	18.5788	2563.65	10.9206	2743.54	11.2953	2743.54	11.2953	85.3797
101517AL3-70	595.864	500475	1.90066	8.3714	0.655309	5.32318	1.61981	0.323338	1.48133	0.914512	1806.01	23.3324	1872.59	13.847	1947.28	11.7142	1947.28	11.7142	92.7453
101517AL3-71	336.6	332866	5.38906	4.60619	0.568212	17.8742	1.22856	0.597387	1.08926	0.886618	3019.3	26.2603	2982.99	11.8142	2958.59	9.16785	2958.59	9.16785	102.052
101517AL3-73	407.036	97295.8	1.83603	12.4163	0.504407	2.37922	1.11775	0.214345	0.997467	0.892388	1251.93	11.3498	1236.38	7.99102	1209.39	9.93103	1209.39	9.93103	103.518
101517AL3-74	2864.97	257224	0.141382	20.4297	0.920753	0.0744284	1.39651	0.0110329	1.04998	0.751858	70.733	0.73862	72.8931	0.982279	144.311	21.6023	70.733	0.73862	NA
101517AL3-75	169.05	67365.4	0.683125	7.07768	0.755988	7.84077	1.46802	0.402659	1.2584	0.857208	2181.27	23.2875	2212.9	13.2207	2242.3	13.072	2242.3	13.072	97.2782
101517AL3-76	248.516	538155	2.04443	8.15514	0.705597	6.22081	1.19343	0.3681	0.962498	0.806499	2020.45	16.6943	2007.38	10.44	1993.94	12.5424	1993.94	12.5424	101.33
101517AL3-77	712.538	41326.1	1.14167	20.4711	1.43365	0.0693899	1.75608	0.0103068	1.01414	0.5775	66.1019	0.666939	68.1203	1.157	139.612	33.6667	66.1019	0.666939	NA
101517AL3-78	224.553	608007	2.35541	5.49277	0.532557	12.8527	1.05155	0.512239	0.906717	0.862269	2666.18	19.799	2668.91	9.90679	2670.97	8.81829	2670.97	8.81829	99.8207
101517AL3-79	447.14	16959.4	2.29541	20.0372	2.07956	0.0726039	2.43892	0.0105556	1.27427	0.522473	67.6893	0.858031	71.1674	1.67629	189.687	48.3835	67.6893	0.858031	NA
101517AL3-80	108.856	12769	1.6167	15.7004	1.25052	0.87643	1.589	0.0998428	0.980379	0.616977	613.488	5.73718	639.052	7.53612	730.532	26.4776	613.488	5.73718	83.9782
101517AL3-81	397.469	766920	14.105	13.0792	0.69602	1.90823	1.23363	0.181092	1.01852	0.825634	1072.94	10.0671	1083.97	8.21911	1106.18	13.9055	1106.18	13.9055	96.9948
101517AL3-82	1545.89	118649	2.96859	14.633	2.64928	0.147716	2.98683	0.0156837	1.3793	0.461793	100.319	1.37299	139.894	3.90334	877.927	54.8481	100.319	1.37299	NA
101517AL3-83	558.524	38420.7	3.49053	18.0664	0.71336	0.54122	1.24363	0.070947	1.01869	0.819128	441.859	4.35039	439.228	4.43439	425.446	15.9122	441.859	4.35039	103.858
101517AL3-84	234.928	166980	1.26042	10.5713	0.800519	3.28726	1.54432	0.252144	1.32064	0.85516	1449.52	17.1435	1478.04	12.0238	1519.21	15.0961	1519.21	15.0961	95.4133
101517AL3-85	287.66	694121	1.81644	9.4617	0.717694	4.42916	1.44116	0.304074	1.24974	0.867178	1711.48	18.7852	1717.81	11.9385	1725.52	13.1799	1725.52	13.1799	99.1861
101517AL3-86	362.035	587586	2.98118	8.05813	0.573381	6.24222	1.18328	0.364973	1.03508	0.874754	2005.7	17.8415	2010.39	10.3562	2015.18	10.1689	2015.18	10.1689	99.5297
101517AL3-87	287.253	111993	1.23717	9.41016	0.577511	4.53694	1.26184	0.309776	1.12192	0.88912	1739.6	17.1054	1737.77	10.4989	1735.54	10.5904	1735.54	10.5904	100.234
101517AL3-88	247.936	162265	2.25812	13.4981	1.98541	0.112298	2.31609	0.0109985	1.19265	0.51494	70.5139	0.836401	108.066	2.37432	1042.91	40.0734	70.5139	0.836401	NA
101517AL3-90	852.456	84018.1	0.706469	19.285	1.04232	0.173457	1.54802	0.0242718	1.14452	0.739347	154.597	1.74835	162.415	2.32345	277.988	23.883	154.597	1.74835	NA
101517AL3-91	183.892	126800	2.02486	9.46196	0.601558	4.39269	1.21923	0.301578	1.0605	0.869808	1699.13	15.8401	1710.97	10.0845	1725.47	11.0472	1725.47	11.0472	98.4733
101517AL3-92	230.487	81726.6	2.52127	9.40165	0.670026	4.00738	1.96853	0.273371	1.85099	0.940292	1557.89	25.6166	1635.69	15.9977	1737.21	12.2847	1737.21	12.2847	89.678
101517AL3-93	47.6031	10767.2	1.83633	12.8798	0.934852	1.85766	1.29365	0.173606	0.894186	0.691215	1031.95	8.52685	1066.16	8.53908	1136.83	18.5819	1136.83	18.5819	90.7745
101517AL3-94	899.976	140681	3.50603	10.8813	0.607004	3.37876	1.33455	0.266762	1.18852	0.890574	1524.35	16.1344	1499.48	10.4565	1464.5	11.5319	1464.5	11.5319	104.086
101517AL3-96	115.677	217943	1.01597	12.8422	0.738664	1.86339	1.22742	0.173633	0.98027	0.798644	1032.1	9.34899	1068.19	8.11063	1142.66	14.685	1142.66	14.685	90.3242
101517AL3-98	970.011	361916	3.84033	9.115	0.736758	5.07077	1.08172	0.335366	0.792026	0.732192	1864.34	12.8226	1831.23	9.17459	1793.78	13.4158	1793.78	13.4158	103.934
101517AL3-99	2044.05	115934	2.65498	18.6418	0.687224	0.366748	1.15839	0.0496071	0.932515	0.805011	312.109	2.84113	317.24	3.1562	355.123	15.4993	312.109	2.84113	NA
101517AL3-101	1037.39	78935.3	1.84743	17.9729	0.577679	0.532628	1.31461	0.0694593	1.18089	0.898277	432.898	4.94417	433.552	4.63893	437.01	12.86	432.898	4.94417	99.059
101517AL3-102	685.47	332614	1.84486	17.8968	0.558535	0.524224	1.15232	0.0680736	1.0079	0.874677	424.539	4.1411	427.969	4.02413	446.459	12.413	424.539	4.1411	95.0904
101517AL3-103	3507.7	63160.8	6.4816	20.3141	0.911826	0.0684237	1.56227	0.0100854	1.26857	0.812003	64.6887	0.816518	67.2025	1.0159	157.658	21.3407	64.6887	0.816518	NA
101517AL3-104	73.2432	15625.8	0.689065	13.6697	0.971108	1.57414	1.28564	0.156131	0.842502	0.655319	935.239	7.33451	960.06	7.98304	1017.34	19.6703	1017.34	19.6703	91.9299
101517AL3-105	254.621	122681	2.28143	9.06492	0.65694	4.76573	1.21069	0.313459	1.01696	0.839981	1757.71	15.6454	1778.88	10.1614	1803.8	11.9476	1803.8	11.9476	97.4446
101517AL3-106	626.041	213934	3.55598	14.1345	0.766696	1.47591	2.03795	0.151365	1.88823	0.926535	908.612	16.0025	920.554	12.3359	949.3	15.6859	949.3	15.6859	95.7139
101517AL3-107	1456.32	15998.8	4.31664	11.9137	1.45269	0.205066	1.98639	0.0177267	1.35477	0.68203	113.273	1.52119	189.404	3.43224	1290.23	28.2641	113.273	1.52119	NA
101517AL3-108	251.218	95902.5	2.14696	16.9934	0.81738	0.672012	1.36109	0.08286	1.08833	0.7996	513.171	5.36847	521.935	5.55468	560.462	17.798	513.171	5.36847	91.5622
101517AL3-109	566.884	100690	5.12462	16.4942	1.60633	0.0890315	1.89265	0.0106552	1.00091	0.528843	68.3245	0.680257	86.6008	1.5711	625.085	34.6269	68.3245	0.680257	NA
101517AL3-110	509.26	128514	2.53297	12.7811	0.699514	2.04662	1.36295	0.189798	1.16975	0.858248	1120.28	12.029	1131.17	9.29696	1152.11	13.8738	1152.11	13.8738	97.2376
101517AL3-111	652.951	1.58896e+06	1.01016	18.6622	0.851157	0.192649	1.54574	0.0260866	1.29029	0.834739	166.009	2.11465	178.887	2.53526	352.647	19.2205	166.009	2.11465	NA
101517AL3-112	527.484	91686.7	1.60289	10.2228	0.700936	3.65114	1.74078	0.270824	1.59342	0.915351	1544.98	21.8903	1560.76	13.8761	1582.15	13.1089	1582.15	13.1089	97.651
101517AL3-113	753.368	593801	6.33676	9.11926	0.535495	5.01086	1.0373	0.331558	0.888395	0.856446	1845.93	14.2602	1821.16	8.78057	1792.93	9.75193	1792.93	9.75193	102.956
101517AL3-114	660.286	67556.1	1.84324	9.68305	0.90039	3.9963	1.5037	0.280775	1.20433	0.800911	1595.26	17.0196	1633.44	12.213	1682.94	16.6242	1682.94	16.6242	94.7899
101517AL3-115	211.831	446120	2.18487	5.76144	0.676529	11.7409	1.2892	0.490817	1.09743	0.851247	2574.21	23.2912	2583.96	12.0635	2591.61	11.2845	2591.61	11.2845	99.3286
101517AL3-116	525.355	354915	1.95559	7.686	0.884058	7.23699	1.50559	0.403596	1.2187	0.809453	2185.57	22.5903	2141.07	13.4323	2098.62	15.5282	2098.62	15.5282	104.143
101517AL3-117	377.446	90332.1	3.50756	10.0057	0.759339	3.2359	1.38554	0.234925	1.15893	0.836448	1360.26	14.2124	1465.8	10.7477	1622.2	14.1276	1622.2	14.1276	83.8531
101517AL3-118	349.794	456469	2.2559	6.59302	0.542023	9.15326	1.11745	0.437873	0.977194	0.874485	2341.11	19.1835	2353.45	10.2292	2364.15	9.25212	2364.15	9.25212	99.0257
101517AL3-120	423.707	142451	0.783064	13.3484	0.661426	1.82712	1.35105	0.176964	1.17808	0.871968	1050.36	11.4186	1055.25	8.86618	1065.38	13.2997	1065.38	13.2997	98.5909
101517AL3-121	236.436	4561.79	1.65924	18.8989	2.35846	0.131022	2.58769	0.0179668	1.06481	0.411489	114.793	1.21151	125.016	3.04382	324.076	53.5636	114.793	1.21151	NA
101517AL3-122	1747.77	30459	1.6575	18.5974	2.21941	0.0825174	2.48915	0.0111349	1.12698	0.452756	71.3835	0.800038	80.509	1.9266	360.461	50.0683	71.3835	0.800038	NA
101517AL3-123	561.379	6.94412e+06	1.31241	9.09189	0.543846	4.96809	1.29702	0.327742	1.1775	0.907846	1827.43	18.7369	1813.91	10.9635	1798.4	9.89732	1798.4	9.89732	101.614
101517AL3-124	53.1049	51693.1	3.18927	8.88289	0.79808	4.87026	1.24223	0.313902	0.951945	0.766321	1759.88	14.6609	1797.12	10.4651	1840.61	14.4476	1840.61	14.4476	95.6139
101517AL3-125	491.685	131599	1.70731	10.7886	0.672737	3.1656	1.38464	0.247804	1.21022	0.874038	1427.14	15.4934	1448.81	10.6846	1480.73	12.7529	1480.73	12.7529	96.3807
101517AL3-126	246.445	99269.9	2.58337	8.90119	0.723835	5.05353	1.24053	0.326385	1.00747	0.812123	1820.84	15.9812	1828.34	10.5158	1836.88	13.1112	1836.88	13.1112	99.1265
101517AL3-128	700.459	399253	1.82002	10.4449	0.654158	3.67024	1.23753	0.278155	1.0505	0.848871	1582.06	14.7374	1564.92	9.87539	1541.85	12.3004	1541.85	12.3004	102.608
101517AL3-129	87.6551	3.30832e+06	2.32446	5.25763	0.603231	14.5962	0.98829	0.556823	0.782835	0.79211	2853.49	18.0496	2789.28	9.39178	2743.16	9.91834	2743.16	9.91834	104.022
101517AL3-130	740.174	5278.34	2.08725	17.418	1.93613	0.0330364	2.27232	0.00417522	1.18947	0.523462	26.8592	0.318818	33.0024	0.737864	506.408	42.5994	26.8592	0.318818	NA
101517AL3-131	1712.72	15645.5	5.67595	20.7673	0.860661	0.0725735	1.51649	0.0109357	1.2486	0.823349	70.1132	0.870688	71.1387	1.04189	105.727	20.3368	70.1132	0.870688	NA
101517AL3-132	2699.39	64105.5	2.59905	20.5682	0.769687	0.0761466	1.2398	0.0113641	0.971948	0.783956	72.8446	0.704027	74.5156	0.890759	128.481	18.1328	72.8446	0.704027	NA
101517AL3-133	521.699	320271	1.3451	9.74829	0.5976	4.18991	1.30062	0.296361	1.15519	0.888191	1673.24	17.0243	1672.05	10.662	1670.54	11.0493	1670.54	11.0493	100.162
101517AL3-134	485.7	469907	2.13755	9.11118	0.672738	5.04911	1.36827	0.333793	1.19146	0.87078	1856.74	19.2215	1827.6	11.5969	1794.54	12.2489	1794.54	12.2489	103.466
101517AL3-135	3480.09	91062.6	4.55781	20.9945	0.735923	0.0705143	1.35237	0.0107416	1.1346	0.838973	68.8758	0.777306	69.1873	0.904503	79.9474	17.4526	68.8758	0.777306	NA
101517AL3-136	1126.34	23944.9	2.81828	17.9975	1.44913	0.0861097	1.64005	0.0112448	0.767965	0.468257	72.0843	0.550498	83.8729	1.32028	433.964	32.3002	72.0843	0.550498	NA
101517AL3-137	539.24	70250.9	1.38927	10.2088	0.75426	3.53853	1.38154	0.262111	1.15747	0.837814	1500.63	15.4959	1535.87	10.9375	1584.72	14.1016	1584.72	14.1016	94.6939
101517AL3-138	529.977	540343	1.89798	5.66852	0.680967	10.3382	3.38253	0.42521	3.31328	0.979526	2284.09	63.7257	2465.53	31.3264	2618.7	11.3321	2618.7	11.3321	87.2222
101517AL3-139	847.426	80802.4	0.581426	13.7888	0.785876	1.34689	1.54514	0.134755	1.33036	0.860996	814.935	10.1843	866.214	9.00426	999.746	15.9481	999.746	15.9481	81.5143
101517AL3-140	359.064	98231	7.01851	9.76724	0.591677	4.21968	1.15019	0.299047	0.986333	0.85754	1686.58	14.6372	1677.86	9.44164	1666.94	10.9448	1666.94	10.9448	101.178
101517AL3-142	1917.71	61562.4	2.4543	20.6044	0.930068	0.0706123	1.38323	0.0105567	1.02386	0.740198	67.6961	0.689488	69.2803	0.926344	124.301	21.9157	67.6961	0.689488	NA
101517AL3-143	177.029	29021.2	1.006	16.1261	0.893589	0.876988	1.56214	0.102615	1.28132	0.820234	629.715	7.68711	639.354	7.41122	673.585	19.1116	629.715	7.68711	93.4872
101517AL3-144	183.883	1.24903e+06	1.18786	3.22814	0.367244	30.2519	1.18594	0.708588	1.12765	0.950846	3453.13	30.1476	3495.03	11.6571	3519.13	5.66908	3519.13	5.66908	98.1247
101517AL3-145	549.301	683256	1.18859	9.81641	0.715564	3.44926	2.03922	0.245678	1.90955	0.936413	1416.15	24.278	1515.7	16.0535	1657.65	13.2525	1657.65	13.2525	85.431
101517AL3-146	1150.45	277747	0.822114	6.39374	0.878065	7.87878	1.63131	0.365512	1.37484	0.842781	2008.25	23.7235	2217.26	14.6995	2416.39	14.9052	2416.39	14.9052	83.1094
101517AL3-148	559.084	57297.8	2.02338	11.9661	0.75038	2.16671	1.68349	0.188122	1.50701	0.895168	1111.19	15.382	1170.42	11.6964	1281.69	14.6073	1281.69	14.6073	86.6976
101517AL3-149	160.529	316659	1.11661	13.7201	0.728606	1.48138	1.55242	0.147473	1.37082	0.88302	886.781	11.3571	922.793	9.41077	1009.87	14.7742	1009.87	14.7742	87.8115
101517AL3-151	254.717	218506	3.23286	12.63	0.598314	2.27289	1.05992	0.208291	0.8749	0.82544	1219.7	9.72244	1203.91	7.47408	1175.71	11.8362	1175.71	11.8362	103.742
101517AL3-152	835.785	585368	0.999891	10.0589	0.565108	4.01268	1.34776	0.292869	1.22356	0.907851	1655.85	17.8675	1636.77	10.9553	1612.33	10.5268	1612.33	10.5268	102.699
101517AL3-153	734.763	385685	2.55564	10.0477	0.575705	3.24655	1.52558	0.236688	1.41278	0.926063	1369.46	17.4305	1468.35	11.8432	1614.4	10.7214	1614.4	10.7214	84.8278
101517AL3-154	634.957	807767	3.19359	12.7445	0.639809	2.16852	1.29177	0.200527	1.1222	0.868725	1178.15	12.0834	1171.01	8.97708	1157.8	12.7025	1157.8	12.7025	101.758
101517AL3-155	114.209	64340.3	1.40393	12.4998	0.811698	2.10873	1.38407	0.191256	1.12107	0.809981	1128.17	11.6028	1151.66	9.53323	1196.14	15.9927	1196.14	15.9927	94.3177
101517AL3-156	399.31	154424	1.8385	10.7596	0.652273	3.35005	1.2239	0.261539	1.0356	0.846148	1497.71	13.8403	1492.8	9.57072	1485.82	12.3565	1485.82	12.3565	100.8
101517AL3-157	547.65	266712	3.02382	9.60703	0.548942	4.45204	1.21933	0.310339	1.08877	0.892927	1742.37	16.6229	1722.08	10.1103	1697.48	10.1148	1697.48	10.1148	102.645
101517AL3-158	355.895	123185	1.27447	10.1543	0.626582	3.31735	2.39937	0.244417	2.31611	0.9653	1409.62	29.3255	1485.14	18.7219	1594.71	11.7006	1594.71	11.7006	88.3931
101517AL3-159	1104.01	51073.7	2.3466	9.72001	0.816793	3.36522	2.60918	0.237338	2.47804	0.949738	1372.84	30.6414	1496.34	20.4268	1675.91	15.0925	1675.91	15.0925	81.9164
101517AL3-160	705.894	493342	1.81645	10.2299	0.552749	3.92073	1.12522	0.291023	0.9801	0.871027	1646.64	14.2424	1617.97	9.1037	1580.85	10.3389	1580.85	10.3389	104.161
101517AL3-161	328.198	426034	0.914631	8.04486	0.659411	6.03223	1.24304	0.352114	1.05372	0.847695	1944.69	17.6894	1980.51	10.8272	2018.1	11.6907	2018.1	11.6907	96.362
101517AL3-162	671.48	153215	2.49525	14.0592	0.590052	1.51949	1.00019	0.155004	0.807604	0.807448	928.955	6.98678	938.269	6.12496	960.225	12.0568	960.225	12.0568	96.7434
101517AL3-163	2290.48	540536	26.7193	9.80125	0.54041	3.51315	0.917505	0.249842	0.741466	0.808134	1437.66	9.55478	1530.18	7.25208	1660.51	10.0045	1660.51	10.0045	86.5793
101517AL3-164	342.308	145848	1.5342	11.204	0.549146	3.01552	1.13748	0.245144	0.99614	0.875744	1413.38	12.6427	1411.55	8.67369	1408.77	10.5116	1408.77	10.5116	100.328
101517AL3-165	224.128	147722	2.95555	10.7729	0.735462	3.02925	1.81368	0.236785	1.65787	0.914091	1369.96	20.4612	1415.02	13.8461	1483.49	13.9368	1483.49	13.9368	92.3476
101517AL3-166	520.973	500037	3.22609	12.5524	0.6009	2.172	1.4864	0.197822	1.35953	0.914642	1163.61	14.474	1172.12	10.3349	1187.87	11.8663	1187.87	11.8663	97.9577
101517AL3-168	340.861	874320	1.14724	8.41154	0.579733	5.4977	1.15953	0.33554	1.0042	0.866041	1865.18	16.264	1900.24	9.962	1938.73	10.3737	1938.73	10.3737	96.2063
101517AL3-170	575.493	97193.6	4.81396	9.71275	0.559611	4.27322	1.35361	0.301152	1.23252	0.91054	1697.02	18.3895	1688.22	11.1383	1677.29	10.3396	1677.29	10.3396	101.176
101517AL3-172	454.313	293888	1.87571	5.19037	0.49144	13.5447	0.991595	0.510099	0.861248	0.868548	2657.05	18.7541	2718.41	9.37651	2764.32	8.0671	2764.32	8.0671	96.1196
101517AL3-174	344.277	822718	1.72512	12.7631	0.72105	1.84996	1.61817	0.171319	1.44864	0.895234	1019.37	13.6587	1063.42	10.6658	1154.91	14.3183	1154.91	14.3183	88.2646
101517AL3-175	231.752	116590	1.06643	8.89648	0.443434	5.11935	0.910171	0.330461	0.794844	0.873291	1840.62	12.7268	1839.32	7.73163	1837.84	8.03113	1837.84	8.03113	100.151
101517AL3-176	424.428	1.13071e+06	1.53242	5.46155	0.479388	13.4242	0.989641	0.531975	0.865781	0.874843	2749.77	19.3806	2709.96	9.35226	2680.4	7.92744	2680.4	7.92744	102.588
101517AL3-179	374.226	972077	20.3035	13.9515	0.485975	1.62041	1.04046	0.164033	0.91999	0.884216	979.152	8.35735	978.149	6.53305	975.893	9.90589	975.893	9.90589	100.334
101517AL3-180	107.486	19706.1	2.52931	9.67059	0.829082	3.42597	3.00615	0.240394	2.88956	0.961216	1388.75	36.1009	1510.37	23.6316	1685.32	15.3029	1685.32	15.3029	82.4025
101517AL3-181	1104.71	190580	1.23206	17.8084	0.47224	0.545924	1.21035	0.0705415	1.11442	0.920743	439.417	4.73378	442.323	4.33997	457.446	10.4845	439.417	4.73378	96.0589
101517AL3-182	1280.94	15523	2.90419	15.264	0.968128	0.482736	1.9433	0.0534644	1.68498	0.867069	335.756	5.5126	399.948	6.42423	789.946	20.3382	335.756	5.5126	NA
101517AL3-183	49.8439	650.64	0.308492	5.92741	2.4863	0.26659	2.8964	0.0114656	1.48574	0.512962	73.4914	1.08569	239.963	6.19015	2544.12	41.6764	73.4914	1.08569	NA
101517AL3-184	1167.67	151289	0.789071	18.8592	0.694342	0.314743	1.09187	0.0430693	0.842653	0.771754	271.83	2.24296	277.851	2.65409	328.845	15.7449	271.83	2.24296	NA
101517AL3-185	409.153	144332	8.79778	13.2908	0.542979	1.83499	1.35912	0.176959	1.24594	0.916729	1050.34	12.0761	1058.07	8.93265	1074.07	10.886	1074.07	10.886	97.7907
101517AL3-186	223.261	86735.7	1.08173	9.83587	0.572737	3.98815	1.00313	0.284625	0.823551	0.820984	1614.61	11.7627	1631.79	8.1438	1653.98	10.6119	1653.98	10.6119	97.6196
101517AL3-187	329.799	10061	0.979224	20.7547	2.86611	0.0280014	3.19547	0.0042168	1.41297	0.442177	27.1261	0.382478	28.0414	0.883795	107.205	67.6962	27.1261	0.382478	NA
101517AL3-188	1053.23	296701	1.31345	8.56804	0.697483	5.15882	1.21625	0.320716	0.996387	0.819227	1793.22	15.5976	1845.85	10.3448	1905.68	12.5297	1905.68	12.5297	94.0988
101517AL3-189	381.515	358226	2.31368	13.2481	0.539958	1.83616	1.1434	0.176502	1.00788	0.881471	1047.84	9.74728	1058.49	7.51652	1080.52	10.8341	1080.52	10.8341	96.9756
101517AL3-191	335.846	84832.5	1.31166	13.3298	0.678959	1.88526	1.09995	0.18234	0.865396	0.786757	1079.75	8.60346	1075.91	7.29789	1068.18	13.6295	1068.18	13.6295	101.083
101517AL3-192	118.097	106612	0.765692	10.5063	0.639054	3.35325	1.33586	0.255626	1.17309	0.878151	1467.42	15.3955	1493.55	10.4486	1530.82	12.0323	1530.82	12.0323	95.8589
101517AL3-193	39.8591	41127	2.87424	13.3009	1.09228	1.77107	1.55673	0.170925	1.10921	0.712524	1017.21	10.4378	1034.91	10.1029	1072.53	21.9221	1072.53	21.9221	94.8416
101517AL3-194	115.821	106323	0.955603	9.67736	0.657982	3.91241	1.38305	0.274719	1.21651	0.879583	1564.71	16.9009	1616.25	11.185	1684.03	12.1467	1684.03	12.1467	92.9148
101517AL3-195	172.046	1.41108e+06	5.98282	5.46092	0.7426	12.1878	1.34522	0.482924	1.12168	0.833826	2539.99	23.5477	2618.97	12.6241	2680.59	12.2819	2680.59	12.2819	94.7547
101517AL3-197	113.573	34501.3	1.94695	17.0968	1.34162	0.611688	1.78461	0.0758809	1.17682	0.659427	471.489	5.35054	484.624	6.87749	547.254	29.3193	471.489	5.35054	86.1554
101517AL3-198	2150.29	172522	2.04983	19.9514	0.650957	0.172239	1.04966	0.024934	0.823436	0.784477	158.764	1.29135	161.36	1.56601	199.655	15.124	158.764	1.29135	NA
101517AL3-199	467.396	3.37613e+06	1.73375	8.25034	0.744483	5.73297	1.47169	0.343194	1.26949	0.86261	1902.02	20.9098	1936.35	12.7245	1973.28	13.2658	1973.28	13.2658	96.3887
101517AL3-200	90.5855	115458	1.52083	5.2951	0.851025	12.3398	1.54564	0.4741	1.29026	0.834771	2501.52	26.751	2630.61	14.5187	2731.48	14.009	2731.48	14.009	91.581
101517AL3-201	489.351	151833	3.12524	9.42052	0.520661	4.64141	1.27663	0.317258	1.16563	0.913053	1776.33	18.0976	1756.75	10.6653	1733.53	9.55009	1733.53	9.55009	102.469
101517AL3-202	290.341	99283.2	1.47973	10.8908	0.637755	3.14231	1.18153	0.248311	0.994623	0.841812	1429.76	12.7541	1443.12	9.10106	1462.84	12.1188	1462.84	12.1188	97.7383
101517AL3-203	214.923	2374.86	3.0807	12.0269	2.10918	0.123202	2.36312	0.0107512	1.0657	0.450969	68.937	0.730744	117.971	2.63195	1271.81	41.1393	68.937	0.730744	NA
101517AL3-207	231.424	175766	2.5154	12.9834	0.648831	2.04058	1.51318	0.192234	1.36702	0.903406	1133.47	14.209	1129.15	10.3118	1120.87	12.9588	1120.87	12.9588	101.124
101517AL3-208	43.364	29488.1	1.2512	13.0691	1.20999	1.81741	1.70157	0.17234	1.19636	0.703092	1024.99	11.3374	1051.75	11.1455	1107.73	24.1615	1107.73	24.1615	92.531
101517AL3-209	695.884	20868.3	1.90734	16.7001	1.02859	0.441607	3.9408	0.0535111	3.8042	0.965336	336.042	12.4562	371.385	12.2582	598.276	22.2557	336.042	12.4562	NA
101517AL3-210	112.131	70648.8	1.23136	9.20106	0.685974	4.72993	1.40328	0.315776	1.22419	0.872376	1769.07	18.9394	1772.56	11.7625	1776.65	12.5156	1776.65	12.5156	99.5732
101517AL3-211	635.415	230479	2.66458	10.8573	1.66884	0.516172	2.35432	0.0406635	1.66066	0.705368	256.945	4.18306	422.591	8.13861	1468.68	31.6887	256.945	4.18306	NA
101517AL3-212	437.23	592599	1.31759	9.01009	0.681781	4.15003	1.56567	0.271311	1.40943	0.900209	1547.45	19.39	1664.22	12.8113	1814.83	12.3808	1814.83	12.3808	85.2672
101517AL3-213	459.735	1.07113e+06	3.35567	9.9403	0.64405	4.1029	1.27915	0.295922	1.10518	0.863996	1671.06	16.2686	1654.88	10.4434	1634.39	11.9652	1634.39	11.9652	102.244
101517AL3-216	918.789	1.93845e+06	1.18681	14.3171	0.573285	1.35717	1.34564	0.140987	1.21741	0.904709	850.239	9.69736	870.654	7.86704	922.971	11.7856	850.239	9.69736	92.1197
101517AL3-218	1034.2	411369	1.77057	4.98415	0.605784	12.1876	1.37058	0.440754	1.22944	0.89702	2354.02	24.2456	2618.95	12.8621	2830.66	9.88087	2830.66	9.88087	83.1614
101517AL3-219	233.928	307821	2.23247	14.1729	0.583148	1.51027	1.09191	0.155311	0.923147	0.845444	930.666	8.00005	934.549	6.67047	943.709	11.9289	943.709	11.9289	98.618
101517AL3-221	926.336	477227	9.77804	5.21314	0.555425	12.707	1.39685	0.480651	1.28167	0.917547	2530.1	26.821	2658.18	13.1493	2757.13	9.12357	2757.13	9.12357	91.7659
101517AL3-222	894.205	1.91462e+06	5.89661	8.62915	0.563604	4.53925	1.30567	0.284211	1.17776	0.902036	1612.53	16.8027	1738.19	10.8645	1892.9	10.1381	1892.9	10.1381	85.1883
101517AL3-223	192.793	30643.7	5.61575	13.5138	0.786645	1.65963	1.16362	0.162733	0.857443	0.736873	971.948	7.73606	993.234	7.37292	1040.53	15.897	1040.53	15.897	93.4093
101517AL3-224	646.99	273093	1.20911	5.90855	0.55269	11.2599	1.27544	0.48273	1.14947	0.901234	2539.14	24.1246	2544.89	11.8948	2549.46	9.25632	2549.46	9.25632	99.5953
101517AL3-225	33.2864	608.882	0.948424	4.5127	3.69733	0.398622	4.15577	0.0130523	1.89741	0.456572	83.5959	1.57591	340.648	12.0271	2991.61	59.4963	83.5959	1.57591	NA
101517AL3-226	279.624	2.62102e+06	2.61778	10.7314	0.663682	3.25675	1.26846	0.253588	1.08097	0.852197	1456.95	14.0964	1470.79	9.85428	1490.8	12.5643	1490.8	12.5643	97.7296
101517AL3-227	578.455	77206.6	1.50572	20.1245	1.39578	0.0759574	1.75154	0.0110913	1.05815	0.604129	71.1055	0.74827	74.3371	1.25552	179.517	32.5138	71.1055	0.74827	NA
101517AL3-229	6165.17	24391.6	2.71706	20.9636	0.847559	0.022685	1.26537	0.00345058	0.939574	0.74253	22.2055	0.208279	22.7766	0.284999	83.4511	20.1025	22.2055	0.208279	NA
101517AL3-231	592.674	52025.7	2.04074	19.553	1.02944	0.186459	1.4879	0.0264536	1.0743	0.722019	168.314	1.78479	173.604	2.37431	246.259	23.7013	168.314	1.78479	NA
101517AL3-232	1181.11	295164	4.15136	9.24184	0.547195	4.71103	1.12213	0.315909	0.979672	0.873045	1769.72	15.1613	1769.2	9.39913	1768.58	9.99495	1768.58	9.99495	100.065
101517AL3-233	499.313	1.14769e+06	3.81558	12.9597	0.588277	1.69087	1.44302	0.158999	1.31767	0.91313	951.213	11.653	1005.09	9.20732	1124.49	11.744	1124.49	11.744	84.5902
101517AL3-234	262.643	134927	1.97062	13.145	0.649613	1.9169	1.34311	0.18283	1.17556	0.875253	1082.42	11.7135	1086.99	8.96249	1096.17	12.987	1096.17	12.987	98.745
101517AL3-235	765.825	7.97538e+06	6.33431	13.1732	0.605797	1.97642	1.11396	0.188912	0.934836	0.8392	1115.48	9.57555	1107.5	7.51092	1091.89	12.1284	1091.89	12.1284	102.16
101517AL3-236	1449.23	150754	15.1907	18.1047	0.587043	0.461154	1.39011	0.0605793	1.26008	0.906456	379.148	4.63977	385.06	4.45484	420.728	13.1063	379.148	4.63977	NA
101517AL3-237	702.673	433709	1.35005	8.69709	0.661114	5.54061	1.31264	0.349639	1.134	0.863907	1932.87	18.938	1906.92	11.291	1878.79	11.9126	1878.79	11.9126	102.879
101517AL3-238	903.173	126033	19.2442	15.2162	0.61193	1.05191	1.23437	0.116137	1.07201	0.868469	708.293	7.19071	729.826	6.4254	796.515	12.8482	708.293	7.19071	88.9239
101517AL3-239	163.47	113192	0.958174	9.8642	0.688961	3.95703	1.06862	0.283217	0.816872	0.764418	1607.54	11.6223	1625.43	8.66186	1648.65	12.7761	1648.65	12.7761	97.5065
101517AL3-240	697.524	301167	3.25835	14.0127	1.79398	1.2922	4.14691	0.131383	3.73878	0.901583	795.752	27.9886	842.273	23.7417	966.945	36.6004	795.752	27.9886	82.2955
101517AL3-241	1337.32	61789.2	3.7065	10.2953	0.968981	0.717277	1.84135	0.0535811	1.56577	0.850339	336.47	5.13322	549.058	7.80946	1568.94	18.154	336.47	5.13322	NA
101517AL3-242	1022.38	20846.4	2.22956	20.4626	0.784046	0.0739957	1.17153	0.0109864	0.870486	0.743036	70.4367	0.609804	72.4842	0.81957	140.581	18.3956	70.4367	0.609804	NA
101517AL3-243	1481.19	388066	1.61761	19.7472	0.985447	0.112985	1.34695	0.0161887	0.918245	0.681721	103.523	0.943005	108.692	1.38839	223.457	22.7679	103.523	0.943005	NA
101517AL3-244	1862.61	28546	1.87409	19.4687	1.59484	0.0734588	1.95785	0.0103769	1.13564	0.580043	66.5493	0.751871	71.9764	1.3604	256.219	36.6739	66.5493	0.751871	NA
101517AL3-245	1199.66	95090.7	2.08259	17.3433	0.629751	0.692178	1.11221	0.0871037	0.91675	0.824258	538.385	4.73516	534.108	4.61947	515.86	13.833	538.385	4.73516	104.366
101517AL3-246	507.178	202359	3.45665	10.7788	0.536261	3.42654	1.24423	0.267987	1.12273	0.902352	1530.58	15.2965	1510.5	9.77988	1482.45	10.1634	1482.45	10.1634	103.246
101517AL3-247	188.618	104599	1.72099	8.78185	0.697906	5.35017	1.30612	0.340912	1.10402	0.845271	1891.05	18.0942	1876.92	11.1741	1861.29	12.6023	1861.29	12.6023	101.599
101517AL3-248	1326	122894	0.851419	18.7963	0.76407	0.358924	1.35719	0.0489512	1.12167	0.82647	308.079	3.37437	311.411	3.63981	336.424	17.297	308.079	3.37437	NA
101517AL3-249	114.513	22676.6	1.70831	13.0339	0.990944	1.80373	1.51672	0.170582	1.14825	0.757059	1015.32	10.7866	1046.81	9.90797	1113.12	19.7665	1113.12	19.7665	91.2138
101517AL3-251	559.728	669614	1.3563	8.3624	0.627897	5.81331	1.41933	0.35273	1.27289	0.896824	1947.62	21.3965	1948.4	12.2971	1949.21	11.2216	1949.21	11.2216	99.9187
101517AL3-252	1015.27	939879	0.798753	17.9588	0.574444	0.521196	1.07289	0.0679153	0.906144	0.844586	423.584	3.71489	425.95	3.73251	438.755	12.7842	423.584	3.71489	96.5421
101517AL3-253	175.412	264817	0.784154	5.69881	0.568719	11.5127	1.06156	0.476045	0.896358	0.844382	2510.02	18.6359	2565.61	9.91773	2609.82	9.47233	2609.82	9.47233	96.1757
101517AL3-254	708.453	7801.91	2.69631	19.7105	2.10576	0.0758561	2.36613	0.0108486	1.07905	0.45604	69.5583	0.746534	74.2415	1.69397	227.78	48.6815	69.5583	0.746534	NA
101517AL3-255	127.454	29135.7	2.02218	15.9324	1.0625	0.896603	1.51019	0.10365	1.0732	0.71064	635.762	6.49734	649.91	7.24923	699.344	22.6221	635.762	6.49734	90.9083
101517AL3-256	284.974	390237	2.80972	8.47991	0.592914	5.90995	1.0928	0.363632	0.917968	0.840014	1999.37	15.7802	1962.7	9.49057	1924.23	10.6257	1924.23	10.6257	103.905
101517AL3-257	1513.83	48392.5	3.76087	20.6196	0.821152	0.0714164	1.30534	0.0106848	1.0147	0.777345	68.5132	0.69152	70.0427	0.88347	122.565	19.3256	68.5132	0.69152	NA
101517AL3-258	157.304	150762	1.30108	9.89707	0.650754	3.78162	1.15281	0.271564	0.951576	0.825439	1548.73	13.1008	1588.85	9.25771	1642.48	12.0772	1642.48	12.0772	94.2924
101517AL3-259	152.965	114888	1.18093	5.48537	0.728926	12.9463	1.40876	0.515277	1.20552	0.85573	2679.12	26.4268	2675.75	13.2794	2673.2	12.0673	2673.2	12.0673	100.221
101517AL3-260	341.332	115970	0.771805	10.0983	0.554404	3.79684	1.20925	0.2782	1.07468	0.888711	1582.29	15.0784	1592.08	9.71914	1605.04	10.3388	1605.04	10.3388	98.5823
101517AL3-261	3362	17245.5	3.83679	20.6529	1.23311	0.0242216	1.62538	0.00362971	1.05892	0.651488	23.3563	0.246876	24.3011	0.390296	118.759	29.0744	23.3563	0.246876	NA
101517AL3-262	1820.08	49521.6	2.92749	20.3576	0.92965	0.0750904	1.48373	0.0110917	1.15637	0.77937	71.1083	0.817759	73.5186	1.05226	152.638	21.7577	71.1083	0.817759	NA
101517AL3-264	270.353	142572	1.26146	11.1864	0.575995	2.9323	1.01164	0.238006	0.831654	0.822084	1376.32	10.3069	1390.29	7.65996	1411.76	11.021	1411.76	11.021	97.4895
101517AL3-265	655.333	115722	4.58643	13.6468	0.572972	1.60386	1.43367	0.158813	1.3142	0.916666	950.176	11.6105	971.716	8.96684	1020.72	11.5997	1020.72	11.5997	93.0883
101517AL3-267	760.169	195636	12.5659	12.296	0.697857	2.19185	1.36312	0.195553	1.17094	0.859012	1151.38	12.3466	1178.46	9.50486	1228.52	13.6825	1228.52	13.6825	93.7209
101517AL3-268	432.599	117148	2.29219	8.795	0.585003	4.54485	1.0908	0.29003	0.920656	0.844022	1641.68	13.3432	1739.22	9.07852	1858.59	10.5667	1858.59	10.5667	88.3294
101517AL3-269	1286.74	112944	8.2282	10.2059	0.769738	0.76993	1.46836	0.0570148	1.25044	0.851586	357.446	4.34798	579.723	6.48582	1585.26	14.39	357.446	4.34798	NA
101517AL3-270	2978.24	179465	2.0315	20.6684	0.796842	0.0686644	1.16039	0.0102974	0.843534	0.726939	66.0417	0.55424	67.4313	0.757051	117.037	18.7903	66.0417	0.55424	NA
101517AL3-271	1653.87	66809.7	1.39643	20.1818	0.807563	0.165699	1.3957	0.0242643	1.13835	0.815607	154.55	1.7384	155.68	2.01446	172.881	18.8706	154.55	1.7384	NA
101517AL3-272	413.406	67592.8	1.37707	13.3761	0.682121	1.8094	1.44745	0.175611	1.27664	0.881995	1042.95	12.2935	1048.86	9.46599	1061.21	13.7256	1061.21	13.7256	98.2799
101517AL3-273	1005.5	463910	1.78635	9.12097	0.697907	4.85169	1.25606	0.321086	1.04432	0.831427	1795.03	16.3622	1793.91	10.5747	1792.59	12.7084	1792.59	12.7084	100.136
101517AL3-274	433.307	342611	1.35618	11.0127	0.423766	3.17459	1.0265	0.25367	0.934942	0.910809	1457.38	12.1952	1451	7.92629	1441.65	8.07551	1441.65	8.07551	101.091
101517AL3-275	1561.61	107711	4.37449	20.2405	0.887552	0.0735666	1.25982	0.0108041	0.894093	0.709698	69.2743	0.616061	72.0784	0.876578	166.1	20.7168	69.2743	0.616061	NA
101517AL3-276	290.348	71959.3	2.02894	13.2564	0.676747	1.83558	1.04106	0.176558	0.791085	0.759886	1048.14	7.65271	1058.28	6.84295	1079.25	13.58	1079.25	13.58	97.1174
101517AL3-277	185.873	89713.7	1.25765	8.03454	0.501678	6.2136	1.00959	0.362237	0.876123	0.8678	1992.77	15.0184	2006.37	8.83034	2020.38	8.89186	2020.38	8.89186	98.6334
101517AL3-278	342.629	110980	1.58452	11.7041	0.678642	2.68415	1.28058	0.227947	1.08597	0.848029	1323.73	12.9954	1324.1	9.47365	1324.68	13.1425	1324.68	13.1425	99.9282
101517AL3-279	127.854	185875	1.16238	9.80526	0.573732	3.94031	0.824195	0.280335	0.591717	0.717933	1593.05	8.35193	1622	6.67486	1659.76	10.6225	1659.76	10.6225	95.981
101517AL3-280	408.847	186169	2.27793	9.99738	0.530989	4.07848	1.06211	0.295851	0.91985	0.866061	1670.7	13.538	1650.01	8.66111	1623.74	9.87659	1623.74	9.87659	102.892
101517AL3-281	488.525	1.12794e+06	2.70478	10.8697	0.592734	3.34283	1.16727	0.263647	1.00558	0.861478	1508.47	13.5248	1491.12	9.12338	1466.51	11.2577	1466.51	11.2577	102.861
101517AL3-282	1465.86	168629	3.82054	11.084	0.780776	2.501	1.39357	0.20114	1.15431	0.82831	1181.44	12.4608	1272.33	10.1087	1429.34	14.9038	1429.34	14.9038	82.6564
101517AL3-283	1730.55	44228.8	1.14388	20.0596	0.834573	0.170412	1.27402	0.0248033	0.962611	0.755569	157.941	1.50189	159.776	1.88351	187.039	19.4373	157.941	1.50189	NA
101517AL3-284	482.735	231535	3.02757	11.0405	0.640506	3.02797	1.35655	0.242565	1.19582	0.881515	1400.02	15.0486	1414.7	10.3549	1436.85	12.2138	1436.85	12.2138	97.4369
101517AL3-285	578.253	94594	1.50609	9.71276	0.599022	3.35526	2.40827	0.23646	2.33258	0.968571	1368.27	28.7564	1494.02	18.8407	1677.29	11.0678	1677.29	11.0678	81.5761
101517AL3-286	283.686	441736	2.03772	8.94547	0.619225	5.00531	1.01328	0.324879	0.802055	0.791545	1813.51	12.6785	1820.22	8.57559	1827.89	11.2268	1827.89	11.2268	99.2136
101517AL3-287	410.325	431360	1.92028	9.0263	0.672572	4.76049	1.37919	0.311781	1.20408	0.873035	1749.46	18.4486	1777.96	11.5735	1811.56	12.2184	1811.56	12.2184	96.5721
101517AL3-288	620.806	1.20386e+06	1.8087	9.80106	0.632564	3.89199	1.48626	0.276779	1.34493	0.904908	1575.12	18.7948	1612.02	12.0069	1660.55	11.7108	1660.55	11.7108	94.8554
101517AL3-291	208.037	89856.9	1.94933	13.357	0.722422	1.75702	1.2669	0.170283	1.04074	0.821485	1013.67	9.76202	1029.75	8.19817	1064.09	14.5191	1064.09	14.5191	95.2621
101517AL3-292	450.677	100141	1.68429	12.286	0.610717	2.03912	1.40338	0.181777	1.26353	0.900346	1076.68	12.5287	1128.67	9.56122	1230.13	11.9808	1230.13	11.9808	87.5253
101517AL3-293	328.471	433878	3.93744	8.95114	0.61191	4.5183	1.58918	0.293455	1.46664	0.922896	1658.77	21.4504	1734.34	13.2128	1826.74	11.0956	1826.74	11.0956	90.805
101517AL3-295	727.554	731429	2.80761	9.58932	0.687016	4.35091	1.30017	0.302731	1.10383	0.848992	1704.83	16.5358	1703.07	10.7349	1700.88	12.654	1700.88	12.654	100.232
101517AL3-296	182.489	5479.57	1.69616	13.2206	6.26224	0.130328	6.44651	0.0125019	1.5303	0.237384	80.0926	1.21807	124.392	7.54736	1084.68	125.679	80.0926	1.21807	NA
101517AL3-297	874.429	95757.3	0.853908	18.0449	0.585436	0.466525	1.12734	0.0610825	0.963413	0.854588	382.205	3.57518	388.786	3.64144	428.109	13.0533	382.205	3.57518	NA
101517AL3-298	1998.52	62284.4	8.1926	20.0277	0.881547	0.0556404	1.40162	0.00808553	1.08968	0.777445	51.9131	0.563414	54.9806	0.750125	190.791	20.5069	51.9131	0.563414	NA
101517AL3-301	3724.54	317316	1.98272	20.8681	0.681759	0.0692311	1.28455	0.0104827	1.0887	0.847536	67.2239	0.728065	67.9695	0.84452	94.2914	16.1538	67.2239	0.728065	NA
101517AL3-303	231.653	3.525e+06	0.968086	10.7833	0.502621	3.25175	0.992849	0.254423	0.856225	0.862392	1461.25	11.1949	1469.6	7.71029	1481.66	9.52683	1481.66	9.52683	98.6223
101517AL3-304	324.063	260976	1.07015	5.88211	0.472741	10.3758	0.856763	0.442837	0.714534	0.833992	2363.33	14.1374	2468.89	7.93486	2556.97	7.91121	2556.97	7.91121	92.4271
101517AL3-305	467.339	201500	0.982844	11.7157	0.699563	2.73739	1.35129	0.232698	1.15611	0.855562	1348.62	14.0687	1338.67	10.0499	1322.77	13.551	1322.77	13.551	101.955
101517AL3-306	1605.52	115431	1.6855	10.6875	0.669324	2.8508	1.20653	0.221069	1.00385	0.832016	1287.52	11.7159	1369.02	9.06974	1498.56	12.658	1498.56	12.658	85.9172
101517AL3-307	104.811	80581	1.14116	11.3856	0.706928	2.69699	1.27375	0.222804	1.05958	0.831853	1296.67	12.4456	1327.63	9.43537	1377.92	13.5889	1377.92	13.5889	94.1037
101517AL3-309	72.9576	26291.1	0.568016	13.7484	1.09671	1.53824	1.56771	0.153449	1.12025	0.714575	920.269	9.60726	945.799	9.6472	1005.69	22.247	1005.69	22.247	91.5061
101517AL3-310	1037.19	1.31979e+06	61.1398	14.0015	0.6408	1.61441	1.35186	0.164012	1.19034	0.880517	979.035	10.812	975.823	8.4764	968.617	13.0948	968.617	13.0948	101.076
101517AL3-311	206.785	142974	1.34105	11.143	0.572568	3.01234	1.27876	0.243554	1.14341	0.894157	1405.15	14.4362	1410.75	9.7485	1419.2	10.9444	1419.2	10.9444	99.0098
101517AL3-313	139.243	95293.3	0.992939	7.30804	0.738369	7.30402	1.34886	0.387303	1.12882	0.836869	2110.31	20.3153	2149.3	12.0473	2186.76	12.8423	2186.76	12.8423	96.504
101517AL3-314	282.705	176035	1.8022	11.4998	0.584903	2.7356	1.19592	0.22826	1.04313	0.872238	1325.37	12.4967	1338.18	8.89273	1358.71	11.2742	1358.71	11.2742	97.5463

## Sheet: 101517AL4
U/Pb detrital zircon geochronologic analyses by LA-ICP-MS analysis
	Isotope Ratios										Apparent Ages (Ma)
Analysis	U	206Pb	U/Th	206Pb*	± 1σ	207Pb*	± 1σ	206Pb*	± 1σ	error	206Pb*	± 1σ	207Pb*	± 1σ	206Pb*	± 1σ	Best Age	± 1σ	% conc
	(ppm)	204Pb		207Pb*	(%)	235U	(%)	238U	(%)	corr.	238U	(Ma)	235U	(Ma)	207Pb*	(Ma)	(Ma)	(Ma)
Sample 101517AL4: (Lat/Long: 46.52405, -112.918)--NAD 1983 coordinate system
101517AL4-0	579.401	188371	1.08978	10.8838	0.770124	3.02322	1.65169	0.238748	1.46116	0.884645	1380.18	18.154	1413.5	12.6031	1464.05	14.6318	1464.05	14.6318	94.2716
101517AL4-2	316.546	150668	2.22443	10.6525	0.522979	3.36953	1.11911	0.26044	0.989393	0.88409	1492.09	13.1787	1497.34	8.7629	1504.76	9.88216	1504.76	9.88216	99.158
101517AL4-3	253.903	52175.8	0.582931	14.2324	0.543193	1.44252	0.766668	0.148966	0.541038	0.7057	895.163	4.52194	906.768	4.59753	935.127	11.1525	935.127	11.1525	95.7264
101517AL4-4	838.13	6.53695e+06	1.83267	10.2437	0.624577	3.80491	1.11928	0.282807	0.928813	0.82983	1605.49	13.2001	1593.78	8.99994	1578.33	11.6864	1578.33	11.6864	101.721
101517AL4-5	533.67	7.61739e+06	1.7599	11.2907	0.62591	3.10106	1.24428	0.25405	1.0754	0.86427	1459.33	14.0441	1432.96	9.55381	1393.99	12.0051	1393.99	12.0051	104.687
101517AL4-6	421.331	184574	3.26186	9.13775	0.509837	3.97281	3.37012	0.263406	3.33133	0.988491	1507.24	44.7739	1628.66	27.3449	1789.24	9.28708	1789.24	9.28708	84.2394
101517AL4-7	3667.04	371772	0.752491	20.6236	0.658415	0.0701534	1.02381	0.0104979	0.784007	0.765777	67.321	0.525055	68.845	0.681475	122.113	15.496	67.321	0.525055	NA
101517AL4-8	415.01	112769	1.56974	11.0829	0.526971	3.03219	0.958935	0.243835	0.80116	0.835469	1406.6	10.1244	1415.76	7.32221	1429.54	10.0587	1429.54	10.0587	98.3955
101517AL4-9	132.659	91832.5	2.05513	7.85868	0.623277	6.65313	1.06406	0.379371	0.862413	0.81049	2073.34	15.2903	2066.42	9.39283	2059.51	10.9977	2059.51	10.9977	100.672
101517AL4-10	59.5082	45057.7	2.16324	8.59105	0.889822	5.41177	1.29811	0.337345	0.945148	0.728096	1873.88	15.3691	1886.72	11.1255	1900.86	15.9923	1900.86	15.9923	98.5807
101517AL4-11	272.629	107135	1.91988	13.3551	0.529313	1.84803	1.03157	0.179079	0.885422	0.858322	1061.94	8.66902	1062.73	6.79675	1064.37	10.6406	1064.37	10.6406	99.7719
101517AL4-12	989.258	278000	5.25772	8.40431	0.701106	4.71542	1.28532	0.287548	1.07727	0.83813	1629.26	15.5092	1769.98	10.7679	1940.27	12.5433	1940.27	12.5433	83.9712
101517AL4-13	126.551	46657.6	2.24948	10.691	0.71044	3.24971	1.11968	0.252087	0.865429	0.772922	1449.23	11.2322	1469.11	8.69403	1497.93	13.4367	1497.93	13.4367	96.7486
101517AL4-14	57.8941	24544.9	1.03918	10.6099	0.874422	3.17955	1.27792	0.244773	0.931916	0.729244	1411.46	11.8132	1452.2	9.87151	1512.33	16.505	1512.33	16.505	93.3301
101517AL4-15	90.5498	54193	2.65375	9.90422	0.659756	3.98963	1.07943	0.286709	0.854331	0.791468	1625.06	12.2717	1632.09	8.7639	1641.14	12.2464	1641.14	12.2464	99.0202
101517AL4-16	204.001	87545.5	1.77083	9.55277	0.605719	4.07318	1.251	0.282326	1.09458	0.874965	1603.07	15.5353	1648.95	10.199	1707.91	11.1465	1707.91	11.1465	93.8612
101517AL4-17	2404.48	103541	4.7947	20.997	0.886437	0.077268	1.2673	0.0117719	0.905688	0.714662	75.4431	0.679297	75.5732	0.922963	79.6654	21.0329	75.4431	0.679297	NA
101517AL4-19	566.341	203280	2.85592	11.6304	0.486736	2.807	1.34291	0.236877	1.25159	0.932003	1370.44	15.4518	1357.41	10.0542	1336.91	9.41001	1336.91	9.41001	102.508
101517AL4-20	129.586	99143.4	2.26411	10.6502	0.580791	3.36931	0.989271	0.260367	0.800837	0.809522	1491.72	10.6648	1497.29	7.74608	1505.17	10.974	1505.17	10.974	99.1065
101517AL4-21	183.238	129137	4.48142	13.7102	0.612034	1.69106	0.962291	0.168224	0.742576	0.771675	1002.32	6.89322	1005.16	6.14012	1011.34	12.4077	1011.34	12.4077	99.1079
101517AL4-22	139.047	100449	1.79266	9.47333	0.771568	4.48454	1.17067	0.308254	0.880425	0.75207	1732.11	13.373	1728.11	9.71974	1723.26	14.1733	1723.26	14.1733	100.513
101517AL4-23	626.057	294951	3.04561	9.27324	0.735178	4.51692	1.39783	0.303922	1.18888	0.85052	1710.73	17.8636	1734.09	11.6211	1762.38	13.4391	1762.38	13.4391	97.0692
101517AL4-24	1197.27	36552.5	4.81187	20.9093	1.01126	0.0703933	1.33041	0.0106797	0.864497	0.649797	68.4806	0.588879	69.0726	0.88839	89.6438	23.9569	68.4806	0.588879	NA
101517AL4-25	208.491	503037	2.2969	5.50921	0.69849	12.7979	1.19718	0.511582	0.972296	0.812153	2663.38	21.213	2664.89	11.2755	2666.02	11.5714	2666.02	11.5714	99.9009
101517AL4-28	351.956	125573	7.89311	4.39969	0.503814	18.9011	1.53281	0.603386	1.44764	0.944439	3043.47	35.1189	3036.78	14.7828	3032.35	8.07763	3032.35	8.07763	100.367
101517AL4-30	754.137	403935	5.73228	9.36932	0.518109	4.57991	1.21461	0.311353	1.09856	0.904457	1747.36	16.8142	1745.62	10.123	1743.52	9.49146	1743.52	9.49146	100.22
101517AL4-31	388.757	158897	161.84	13.6312	0.698029	1.70786	1.21327	0.168917	0.992366	0.817924	1006.14	9.24445	1011.48	7.77004	1023.04	14.1266	1023.04	14.1266	98.3482
101517AL4-32	329.866	124725	2.38188	16.1377	0.684201	0.899677	1.25665	0.105345	1.05405	0.838783	645.659	6.47587	651.555	6.04303	672.036	14.6452	645.659	6.47587	96.0751
101517AL4-33	1058.88	55777.1	6.13578	21.1637	0.786071	0.0698698	1.4142	0.0107292	1.17561	0.831289	68.7966	0.804479	68.5759	0.937777	60.8865	18.7214	68.7966	0.804479	NA
101517AL4-34	241.253	771106	1.99582	11.1712	0.616935	3.04014	1.16745	0.246423	0.991121	0.848965	1420	12.6317	1417.76	8.92021	1414.37	11.8002	1414.37	11.8002	100.398
101517AL4-35	205.372	101079	2.48071	9.71893	0.670159	4.19026	1.35107	0.295493	1.17314	0.86831	1668.92	17.2497	1672.12	11.0758	1676.11	12.384	1676.11	12.384	99.5709
101517AL4-36	533.058	3.85453e+06	2.75832	9.0981	0.415416	4.98285	1.12953	0.32894	1.05036	0.929914	1833.24	16.7598	1816.42	9.55233	1797.15	7.56119	1797.15	7.56119	102.008
101517AL4-37	197.082	67681.4	2.45563	17.793	0.723801	0.471808	1.4787	0.0609119	1.28944	0.872012	381.169	4.77247	392.437	4.81313	459.404	16.0567	381.169	4.77247	NA
101517AL4-38	243.87	209262	2.83585	8.33174	0.688456	5.78914	1.25032	0.349975	1.04371	0.834753	1934.48	17.4425	1944.79	10.826	1955.77	12.2924	1955.77	12.2924	98.9116
101517AL4-40	482.342	127959	2.2832	11.8239	0.691607	2.53906	1.18258	0.217831	0.959258	0.811157	1270.41	11.0608	1283.3	8.61501	1304.94	13.4317	1304.94	13.4317	97.3536
101517AL4-41	600.952	118332	2.959	12.4927	0.660463	2.26958	1.49307	0.205726	1.33905	0.896842	1206.01	14.7284	1202.89	10.524	1197.27	13.0254	1197.27	13.0254	100.73
101517AL4-42	437.18	71852.2	2.73173	9.29933	0.690656	4.56787	1.53178	0.308215	1.36724	0.892582	1731.92	20.7653	1743.43	12.7607	1757.24	12.6333	1757.24	12.6333	98.5588
101517AL4-43	1247.07	97164.3	2.37294	16.6898	0.489076	0.705099	1.31936	0.0853866	1.22536	0.928756	528.195	6.21423	541.832	5.53984	599.607	10.5767	528.195	6.21423	88.0902
101517AL4-44	660.015	4.86622e+07	0.614606	10.7125	0.501743	3.25503	1.19694	0.253007	1.0867	0.907899	1453.97	14.1452	1470.38	9.29752	1494.14	9.49432	1494.14	9.49432	97.3114
101517AL4-45	879.975	259056	1.82233	13.1405	4.03736	0.263526	5.39361	0.0251259	3.57641	0.663083	159.97	5.65079	237.504	11.4226	1096.85	80.8558	159.97	5.65079	NA
101517AL4-47	183.184	1.7533e+06	1.23075	9.8484	0.575397	3.89516	0.985645	0.278342	0.800258	0.811914	1583.01	11.2326	1612.68	7.96375	1651.62	10.6661	1651.62	10.6661	95.8454
101517AL4-48	452.927	354406	1.30694	6.04491	0.589333	10.6028	1.24949	0.46505	1.10178	0.881782	2461.82	22.5456	2488.96	11.5942	2511.17	9.90776	2511.17	9.90776	98.0347
101517AL4-49	1266.45	591664	3.71357	10.8611	0.714537	2.82605	2.18704	0.222711	2.06703	0.945123	1296.18	24.2707	1362.47	16.4042	1468.02	13.5684	1468.02	13.5684	88.2944
101517AL4-50	52.261	25181.9	3.63403	9.07523	0.807963	4.48022	1.22481	0.295016	0.92052	0.751561	1666.54	13.5183	1727.31	10.1675	1801.73	14.698	1801.73	14.698	92.4967
101517AL4-51	726.664	66145.5	7.86562	11.6125	0.66275	0.52637	1.41553	0.0443511	1.25079	0.883623	279.747	3.42422	429.398	4.95659	1339.89	12.8073	279.747	3.42422	NA
101517AL4-52	184.644	81179.6	1.56697	8.3017	0.759349	5.70274	1.18858	0.343509	0.914396	0.769316	1903.53	15.0713	1931.78	10.2685	1962.22	13.5482	1962.22	13.5482	97.0092
101517AL4-53	507.884	152938	3.32727	10.8729	0.562927	3.30903	1.57481	0.261056	1.47076	0.933929	1495.24	19.6273	1483.18	12.28	1465.96	10.6924	1465.96	10.6924	101.998
101517AL4-54	820.008	605408	3.42478	13.046	0.541296	1.97187	1.16844	0.186656	1.03549	0.88622	1103.24	10.4998	1105.95	7.87213	1111.27	10.8212	1111.27	10.8212	99.2774
101517AL4-55	209.803	20285.7	2.97741	12.7075	1.21941	1.98517	1.40017	0.18304	0.688123	0.491457	1083.56	6.86325	1110.48	9.45479	1163.56	24.1691	1163.56	24.1691	93.1242
101517AL4-56	228.965	76960.4	2.18543	13.6041	0.947033	1.66028	1.40399	0.163885	1.0365	0.73825	978.333	9.40843	993.484	8.89735	1027.07	19.1731	1027.07	19.1731	95.2547
101517AL4-59	1796.46	44085.8	0.883925	20.9003	0.950551	0.0705976	1.38618	0.0107061	1.00893	0.72785	68.649	0.688944	69.2663	0.928136	90.637	22.5381	68.649	0.688944	NA
101517AL4-60	113.032	111160	1.46354	12.4414	0.57104	2.35897	0.943663	0.21295	0.751275	0.796126	1244.52	8.50262	1230.27	6.7293	1205.42	11.2679	1205.42	11.2679	103.244
101517AL4-61	341.502	988666	2.31127	12.7046	0.622329	1.99834	1.40733	0.184212	1.26225	0.896913	1089.94	12.6576	1114.95	9.52414	1164.01	12.3509	1164.01	12.3509	93.6366
101517AL4-62	750.376	239033	1.68646	14.0087	0.498495	1.65044	1.04947	0.167759	0.923522	0.879988	999.754	8.55262	989.72	6.63572	967.53	10.1743	967.53	10.1743	103.331
101517AL4-63	604.478	313130	6.18508	10.827	0.585366	3.22478	1.31289	0.253335	1.17518	0.895103	1455.65	15.3127	1463.13	10.1758	1473.99	11.1066	1473.99	11.1066	98.7561
101517AL4-64	562.345	283753	2.6618	10.0101	0.588443	3.94435	1.87564	0.286486	1.78095	0.949513	1623.94	25.5664	1622.83	15.1942	1621.37	10.9488	1621.37	10.9488	100.159
101517AL4-66	678.362	161850	3.12568	10.6883	0.515515	3.41194	0.913594	0.264605	0.754254	0.825589	1513.36	10.1737	1507.15	7.17402	1498.41	9.74937	1498.41	9.74937	100.998
101517AL4-67	558.868	31307.3	2.27698	13.211	5.4845	0.18596	7.34252	0.0178256	4.88188	0.664879	113.899	5.51158	173.176	11.6908	1086.13	110.025	113.899	5.51158	NA
101517AL4-69	231.842	12442.4	2.28689	20.3825	2.16312	0.16458	2.35381	0.0243401	0.928091	0.394293	155.027	1.42163	154.704	3.37762	149.758	50.7108	155.027	1.42163	NA
101517AL4-70	535.556	766768	2.63047	5.21353	0.491724	14.0774	1.19793	0.532526	1.09235	0.91187	2752.09	24.469	2754.93	11.3573	2757	8.07728	2757	8.07728	99.8217
101517AL4-71	63.146	33587	2.5062	11.7792	0.877796	2.59637	1.30788	0.221906	0.969555	0.741315	1291.94	11.3507	1299.61	9.5877	1312.29	17.0301	1312.29	17.0301	98.449
101517AL4-72	659.877	296892	0.778884	19.4581	0.796679	0.278693	1.18601	0.0393474	0.878594	0.740797	248.786	2.14418	249.62	2.6247	257.462	18.3064	248.786	2.14418	NA
101517AL4-73	437.261	288131	1.91792	5.548	0.557907	12.6578	1.06332	0.509546	0.9052	0.851297	2654.69	19.697	2654.53	10.0066	2654.39	9.25278	2654.39	9.25278	100.011
101517AL4-74	203.448	47843.3	2.08345	20.7171	2.06047	0.0693937	2.38113	0.0104313	1.19341	0.501194	66.896	0.794214	68.1239	1.5689	111.436	48.664	66.896	0.794214	NA
101517AL4-76	53.1429	79256.8	2.94026	5.32316	0.593537	13.3306	1.03143	0.514881	0.843539	0.817836	2677.44	18.4822	2703.35	9.74244	2722.77	9.78042	2722.77	9.78042	98.3348
101517AL4-77	33.2794	31609.9	2.14805	8.10392	0.839008	6.25951	1.75575	0.368064	1.54231	0.878435	2020.28	26.7492	2012.81	15.373	2005.13	14.8951	2005.13	14.8951	100.756
101517AL4-78	56.3522	64920.1	2.04091	8.62146	0.708184	5.32966	1.4022	0.333402	1.21022	0.863088	1854.85	19.507	1873.63	11.9889	1894.51	12.737	1894.51	12.737	97.9067
101517AL4-79	727.872	818914	1.25947	9.5611	0.709656	3.73053	1.58315	0.258801	1.41519	0.893906	1483.71	18.7561	1577.94	12.6776	1706.31	13.0621	1706.31	13.0621	86.9543
101517AL4-80	150.973	84781.2	2.32984	12.6613	0.587988	2.15778	1.02919	0.198232	0.844693	0.820734	1165.81	9.00845	1167.56	7.141	1170.81	11.6596	1170.81	11.6596	99.5733
101517AL4-81	1046.15	239001	3.01042	8.78372	0.608398	5.04433	1.09558	0.321492	0.911123	0.831636	1797.01	14.289	1826.8	9.28412	1860.91	10.9863	1860.91	10.9863	96.5664
101517AL4-82	866.142	14632.8	3.44731	20.3494	1.54933	0.0731403	1.86778	0.0107993	1.04316	0.558502	69.2435	0.718456	71.6751	1.29258	153.584	36.2937	69.2435	0.718456	NA
101517AL4-83	661.349	432043	1.64268	8.46209	0.778769	5.23991	1.43738	0.321728	1.20813	0.84051	1798.16	18.9575	1859.13	12.2566	1928	13.9509	1928	13.9509	93.2657
101517AL4-84	97.7474	60169.5	0.872396	9.10212	0.678851	4.71284	1.23814	0.311253	1.03545	0.836294	1746.87	15.8444	1769.53	10.3716	1796.35	12.3574	1796.35	12.3574	97.2454
101517AL4-85	80.4837	111063	1.15299	5.53521	0.594397	12.1571	1.33124	0.488262	1.19117	0.894785	2563.15	25.1924	2616.6	12.4905	2658.22	9.85433	2658.22	9.85433	96.4237
101517AL4-86	2445.39	408425	8.17937	10.9701	1.11718	0.797605	1.80965	0.0634872	1.42363	0.786692	396.798	5.47861	595.477	8.15317	1449.03	21.2689	396.798	5.47861	NA
101517AL4-87	87.0414	409321	3.13557	12.5552	1.12224	1.9614	2.21256	0.17868	1.90682	0.861819	1059.76	18.6342	1102.36	14.8807	1187.45	22.1768	1187.45	22.1768	89.2466
101517AL4-88	320.443	68377.9	1.47795	17.8124	0.721927	0.555949	0.962321	0.0718532	0.636305	0.661219	447.311	2.74976	448.886	3.49133	456.989	16.0257	447.311	2.74976	97.8822
101517AL4-89	159.467	7.69014e+06	3.36857	12.7063	0.68579	2.10767	1.16801	0.194317	0.94548	0.809481	1144.72	9.91659	1151.32	8.04363	1163.74	13.6095	1163.74	13.6095	98.3654
101517AL4-90	194.246	97119.7	3.9148	9.09859	0.578506	4.7727	0.923415	0.315084	0.719741	0.779433	1765.68	11.1165	1780.11	7.75212	1797.06	10.5299	1797.06	10.5299	98.2539
101517AL4-91	657.134	279235	1.13024	8.18891	0.573411	5.95381	1.0088	0.35376	0.829984	0.822745	1952.53	13.9816	1969.12	8.77036	1986.59	10.2031	1986.59	10.2031	98.2855
101517AL4-92	845.558	170237	2.66848	8.6838	0.747622	5.04882	1.53332	0.318117	1.33871	0.873076	1780.53	20.8275	1827.55	12.9959	1881.54	13.4673	1881.54	13.4673	94.6313
101517AL4-94	234.905	688098	2.83884	5.82584	0.656776	11.8989	1.30939	0.502982	1.13276	0.865106	2626.6	24.4376	2596.48	12.2652	2573.05	10.9779	2573.05	10.9779	102.081
101517AL4-96	609.2	8632.78	1.61541	21.7537	1.55999	0.0669719	1.90449	0.0105709	1.09247	0.573629	67.7869	0.736671	65.8219	1.2138	NA	NA	67.7869	0.736671	NA
101517AL4-97	395.496	601542	2.50397	9.35783	0.583386	4.71735	1.06336	0.320303	0.889046	0.83607	1791.21	13.9037	1770.33	8.90894	1745.76	10.6845	1745.76	10.6845	102.603
101517AL4-98	330.519	878045	1.33752	8.56944	0.555013	5.70709	1.44493	0.354858	1.33409	0.923287	1957.76	22.525	1932.44	12.4848	1905.39	9.97066	1905.39	9.97066	102.748
101517AL4-99	260.547	79455.2	4.60398	9.23477	0.54023	4.59778	1.23082	0.308079	1.10592	0.898526	1731.25	16.7908	1748.87	10.2653	1769.98	9.866	1769.98	9.866	97.8118
101517AL4-101	381.732	46204.5	1.86005	17.5761	0.686967	0.599568	1.06238	0.0764623	0.810387	0.762804	474.972	3.71073	476.959	4.04341	486.538	15.1552	474.972	3.71073	97.6228
101517AL4-102	317.709	3723.85	1.92041	8.80761	16.4866	0.202246	16.6151	0.0129248	2.06214	0.124113	82.7851	1.69623	187.025	28.3878	1856	300.035	82.7851	1.69623	NA
101517AL4-104	384.605	120312	1.63165	17.0108	0.77871	0.716475	1.42403	0.0884327	1.19226	0.837241	546.261	6.24454	548.584	6.03558	558.222	16.9701	546.261	6.24454	97.8573
101517AL4-105	20.1835	41736.3	1.30941	5.35259	0.557377	12.4222	1.25797	0.482449	1.12775	0.896485	2537.92	23.6595	2636.86	11.8221	2713.68	9.19243	2713.68	9.19243	93.5232
101517AL4-106	334.983	233193	2.74097	9.85668	0.582969	3.99783	1.17797	0.285919	1.0236	0.868953	1621.1	14.6716	1633.76	9.56794	1650.06	10.8086	1650.06	10.8086	98.2448
101517AL4-107	215.959	83603.5	3.61388	12.7424	0.689555	2.05621	0.951374	0.19011	0.655459	0.68896	1121.97	6.74967	1134.36	6.49938	1158.13	13.6882	1158.13	13.6882	96.8778
101517AL4-108	1378.66	110347	11.3144	13.4799	1.51661	0.162853	1.73174	0.0159284	0.835946	0.482721	101.872	0.844899	153.197	2.46255	1045.63	30.6084	101.872	0.844899	NA
101517AL4-109	395.298	515825	5.7431	6.2983	0.609803	9.37997	1.61896	0.428659	1.49973	0.92635	2299.67	29.008	2375.87	14.8561	2441.89	10.3265	2441.89	10.3265	94.1761
101517AL4-110	203.037	1.42488e+06	3.42641	12.6168	0.692287	2.11863	1.30265	0.193951	1.10346	0.847092	1142.74	11.5554	1154.89	8.98587	1177.78	13.7106	1177.78	13.7106	97.0257
101517AL4-112	391.293	9212.26	2.28607	20.709	2.04798	0.0724077	2.27751	0.0108801	0.996402	0.437496	69.7588	0.691331	70.9817	1.56141	112.388	48.3515	69.7588	0.691331	NA
101517AL4-113	385.699	383218	1.84531	9.93613	0.60995	3.9943	1.14686	0.287969	0.971214	0.846844	1631.37	13.9983	1633.04	9.31365	1635.17	11.3306	1635.17	11.3306	99.768
101517AL4-114	124.229	801431	1.86421	10.1305	0.631327	3.72372	1.47475	0.273713	1.33278	0.903736	1559.62	18.463	1576.48	11.8048	1599.1	11.7824	1599.1	11.7824	97.5314
101517AL4-115	81.8302	63436.9	0.720818	11.7212	0.786618	2.5648	1.51375	0.218129	1.29332	0.854381	1271.98	14.9295	1290.66	11.0591	1321.85	15.2402	1321.85	15.2402	96.2273
101517AL4-116	214.117	149568	1.81147	12.9812	0.677623	1.69415	1.14121	0.159571	0.91825	0.80463	954.395	8.14586	1006.33	7.28673	1121.21	13.5327	1121.21	13.5327	85.1218
101517AL4-117	268.783	5773.86	2.6419	20.3549	2.34579	0.0744866	2.59033	0.0110011	1.09868	0.424147	70.5301	0.770678	72.9481	1.82332	152.96	54.9543	70.5301	0.770678	NA
101517AL4-118	120.712	101263	1.03997	13.3221	0.798227	1.8203	1.28968	0.175955	1.01297	0.785444	1044.84	9.77075	1052.79	8.4522	1069.34	16.042	1069.34	16.042	97.709
101517AL4-119	1414.85	56213.2	3.04226	20.7894	0.85499	0.0692899	1.07432	0.010452	0.650511	0.605507	67.0281	0.433766	68.0254	0.706871	103.26	20.213	67.0281	0.433766	NA
101517AL4-120	343.574	84903.3	1.01296	17.7465	0.987022	0.278243	1.5331	0.0358282	1.1731	0.765186	226.922	2.61572	249.263	3.38854	465.187	21.866	226.922	2.61572	NA
101517AL4-121	745.698	501560	2.11978	5.79924	0.556389	11.1819	1.2616	0.470518	1.13228	0.897498	2485.83	23.355	2538.41	11.759	2580.69	9.2929	2580.69	9.2929	96.3243
101517AL4-122	147.307	1.79541e+06	1.46381	13.3483	0.684587	1.8512	1.36955	0.179294	1.18617	0.866104	1063.11	11.6254	1063.86	9.02909	1065.4	13.7663	1065.4	13.7663	99.7857
101517AL4-123	394.194	166543	3.55673	13.36	0.550865	1.85599	1.32104	0.179916	1.20071	0.90891	1066.52	11.8025	1065.56	8.71718	1063.63	11.0792	1063.63	11.0792	100.272
101517AL4-124	58.8392	208731	1.68665	12.4794	0.808463	2.10652	1.32457	0.190743	1.04922	0.792124	1125.4	10.8347	1150.94	9.12025	1199.38	15.935	1199.38	15.935	93.8318
101517AL4-125	1182.84	50627.7	4.27811	19.5196	0.682879	0.198367	1.09866	0.0280949	0.860662	0.783371	178.614	1.51616	183.743	1.84661	250.193	15.6997	178.614	1.51616	NA
101517AL4-126	138.589	70150.5	1.67969	13.4175	0.698069	1.69269	1.30727	0.164792	1.10529	0.845492	983.35	10.0805	1005.78	8.34443	1054.99	14.0781	1054.99	14.0781	93.2096
101517AL4-127	160.613	190217	3.59974	15.953	0.951545	0.969518	1.34944	0.112224	0.956842	0.709066	685.652	6.22376	688.215	6.74505	696.597	20.2663	685.652	6.22376	98.4288
101517AL4-129	361.112	103218	1.98117	13.3797	0.566631	1.91524	1.58065	0.185933	1.4756	0.933538	1099.31	14.9136	1086.41	10.5446	1060.66	11.4027	1060.66	11.4027	103.643
101517AL4-131	351.705	112556	2.22631	17.828	0.703556	0.537537	1.23509	0.0695343	1.01512	0.821896	433.35	4.25441	436.799	4.38445	455.006	15.614	433.35	4.25441	95.2403
101517AL4-132	1468.26	310695	6.5329	20.2884	0.683824	0.0708248	1.17289	0.0104261	0.952925	0.812456	66.8629	0.633861	69.4818	0.787691	160.615	15.9956	66.8629	0.633861	NA
101517AL4-134	72.792	125613	1.60617	12.6463	0.65652	2.14569	1.20542	0.196887	1.01095	0.838669	1158.58	10.7204	1163.66	8.34887	1173.16	13.012	1173.16	13.012	98.7573
101517AL4-135	359.155	183889	4.79289	9.15644	0.579628	4.97784	1.04843	0.330716	0.873636	0.833279	1841.85	13.9965	1815.57	8.86497	1785.51	10.5635	1785.51	10.5635	103.155
101517AL4-138	38.607	26129.3	0.982905	5.26317	0.705321	13.4256	1.28542	0.512707	1.07463	0.836013	2668.17	23.4797	2710.06	12.1477	2741.43	11.5993	2741.43	11.5993	97.3279
101517AL4-139	140.273	4074.87	801.087	20.7834	3.24795	0.100061	3.51126	0.0150893	1.33406	0.379937	96.5456	1.27838	96.8328	3.24297	103.888	76.7686	96.5456	1.27838	NA
101517AL4-140	618.237	656833	2.00446	8.47859	0.554786	5.54092	1.07438	0.340874	0.920053	0.85636	1890.87	15.0778	1906.97	9.24148	1924.51	9.94193	1924.51	9.94193	98.252
101517AL4-141	934.039	267323	1.51234	17.9428	0.678231	0.501259	1.0573	0.0652589	0.811099	0.767143	407.528	3.20315	412.555	3.58456	440.749	15.1028	407.528	3.20315	92.4628
101517AL4-144	885.121	2.25725e+06	4.66962	9.99043	2.17661	0.640971	4.40161	0.0464633	3.82578	0.869177	292.772	10.9503	502.907	17.4591	1625.04	40.4869	292.772	10.9503	NA
101517AL4-145	288.282	158697	0.888275	9.92019	0.501166	3.91087	1.11444	0.281502	0.995391	0.893178	1598.92	14.0953	1615.93	9.01181	1638.15	9.30615	1638.15	9.30615	97.6054
101517AL4-146	748.489	44245.7	4.20712	9.46355	0.915083	4.42724	1.51691	0.304001	1.20981	0.79755	1711.12	18.1817	1717.45	12.5651	1725.16	16.8057	1725.16	16.8057	99.1858
101517AL4-147	71.6623	46796.2	0.929196	11.1006	0.66644	2.99964	1.15935	0.241603	0.94866	0.818267	1395.02	11.9	1407.53	8.82886	1426.49	12.7262	1426.49	12.7262	97.7941
101517AL4-148	459.046	31794.6	1.09449	20.2154	1.50111	0.081704	1.80723	0.0119843	1.00635	0.556847	76.7965	0.768255	79.7458	1.38605	169.003	35.0701	76.7965	0.768255	NA
101517AL4-150	42.8969	23681.9	0.472392	12.4929	0.900677	1.9483	3.17541	0.176606	3.04499	0.95893	1048.41	29.4634	1097.86	21.3097	1197.25	17.7436	1197.25	17.7436	87.5681
101517AL4-151	767.627	19201.3	1.19248	21.1125	1.3326	0.0745787	1.75205	0.0114246	1.13747	0.649223	73.2303	0.828259	73.0352	1.23467	66.6446	31.7262	73.2303	0.828259	NA
101517AL4-152	1055.48	869098	2.03731	10.9978	0.594607	3.083	1.36198	0.246018	1.22533	0.899668	1417.91	15.5961	1428.47	10.4427	1444.23	11.3272	1444.23	11.3272	98.1772
101517AL4-153	286.269	246059	2.1188	13.6404	0.513851	1.82112	0.969081	0.180241	0.821629	0.847844	1068.29	8.08868	1053.09	6.35203	1021.68	10.4014	1021.68	10.4014	104.563
101517AL4-154	134.854	792663	1.58949	13.4429	0.802669	1.79012	1.46244	0.174607	1.22248	0.835916	1037.45	11.7146	1041.87	9.52752	1051.18	16.1942	1051.18	16.1942	98.6935
101517AL4-155	453.799	141278	2.31632	10.1877	0.590878	3.79466	1.22042	0.280501	1.06784	0.87498	1593.89	15.0793	1591.62	9.80771	1588.59	11.0426	1588.59	11.0426	100.333
101517AL4-156	356.638	168680	1.04985	9.90071	0.645109	3.85531	1.52486	0.276958	1.38167	0.906101	1576.02	19.318	1604.38	12.2948	1641.8	11.9735	1641.8	11.9735	95.9937
101517AL4-157	287.793	124523	2.27363	8.97747	0.584674	5.17016	0.969888	0.33678	0.773847	0.797872	1871.16	12.5678	1847.72	8.25218	1821.41	10.6086	1821.41	10.6086	102.731
101517AL4-158	159.452	104331	2.40044	13.5063	0.689036	1.75623	1.20143	0.17211	0.984207	0.819196	1023.73	9.31628	1029.46	7.77326	1041.65	13.9246	1041.65	13.9246	98.2796
101517AL4-159	1646.15	77220.8	4.7619	16.1068	1.96475	0.126478	2.38554	0.0147813	1.35298	0.567159	94.589	1.27043	120.928	2.71964	676.13	41.9876	94.589	1.27043	NA
101517AL4-160	56.7454	97032.8	3.66009	9.93592	0.637142	3.91522	1.23205	0.282262	1.05451	0.855901	1602.75	14.9639	1616.83	9.96518	1635.21	11.8356	1635.21	11.8356	98.0149
101517AL4-162	702.06	635625	2.57229	9.8972	0.508868	3.77507	1.00688	0.271097	0.868827	0.862891	1546.37	11.9453	1587.46	8.0828	1642.46	9.44394	1642.46	9.44394	94.1499
101517AL4-163	350.569	558324	5.79581	12.8684	0.696537	2.16269	1.29692	0.201933	1.094	0.843538	1185.69	11.8485	1169.13	9.00517	1138.6	13.8556	1138.6	13.8556	104.136
101517AL4-164	95.5985	155230	1.89593	4.64426	0.527566	16.8665	1.11361	0.568369	0.98072	0.880664	2901.12	22.9112	2927.28	10.675	2945.3	8.52202	2945.3	8.52202	98.5
101517AL4-165	221.821	30129.8	1.91711	18.0379	0.998062	0.479721	1.47338	0.0627858	1.08385	0.735619	392.545	4.12764	397.881	4.85017	428.973	22.2503	392.545	4.12764	NA
101517AL4-166	281.149	42217.2	1.31308	16.3964	0.841023	0.769067	1.22335	0.0914959	0.888405	0.726207	564.378	4.80075	579.228	5.40013	637.926	18.1015	564.378	4.80075	88.4707
101517AL4-167	186.493	138936	3.85936	11.4002	0.593067	2.91307	1.16463	0.240963	1.00232	0.86063	1391.7	12.5463	1385.31	8.80366	1375.46	11.404	1375.46	11.404	101.18
101517AL4-168	624.664	27420.9	2.03709	17.9195	2.77609	0.208729	3.18087	0.0271391	1.55283	0.488177	172.618	2.6449	192.486	5.57744	443.641	61.7607	172.618	2.6449	NA
101517AL4-169	448.294	110048	4.5662	12.8889	0.517398	2.05455	0.987736	0.192141	0.84138	0.851828	1132.96	8.74185	1133.81	6.74601	1135.45	10.3122	1135.45	10.3122	99.7807
101517AL4-171	932.081	607882	20.9288	3.32692	0.652842	28.5838	1.29455	0.690002	1.11788	0.863529	3382.63	29.4226	3439.33	12.701	3472.52	10.1138	3472.52	10.1138	97.4113
101517AL4-172	228.807	59637.2	3.06624	18.0592	0.866041	0.520079	1.38811	0.0681482	1.08481	0.781503	424.989	4.46163	425.204	4.82235	426.345	19.3162	424.989	4.46163	99.682
101517AL4-173	361.455	771247	2.4537	9.91714	0.539182	4.08238	1.12145	0.293757	0.983326	0.876835	1660.27	14.393	1650.79	9.14676	1638.72	10.0114	1638.72	10.0114	101.315
101517AL4-174	126.662	10620.6	1.5218	18.0579	0.969183	0.522552	1.32403	0.0684676	0.902078	0.681311	426.917	3.72637	426.855	4.61412	426.497	21.6156	426.917	3.72637	100.098
101517AL4-175	76.4568	67751	3.28967	12.8169	0.72792	2.02211	1.26798	0.18805	1.03823	0.818802	1110.8	10.5938	1122.97	8.61486	1146.59	14.462	1146.59	14.462	96.8787
101517AL4-176	545.516	133306	2.97654	17.6095	0.749266	0.497683	1.41916	0.0635898	1.20524	0.849266	397.42	4.64522	410.132	4.78847	482.35	16.5644	397.42	4.64522	NA
101517AL4-177	1120.93	70847	3.78725	18.6425	0.675818	0.414537	1.20136	0.0560732	0.993242	0.826766	351.7	3.39965	352.138	3.57481	355.017	15.2406	351.7	3.39965	NA
101517AL4-178	240.188	198357	3.4577	9.52481	0.554714	3.72906	1.24584	0.257717	1.11553	0.895404	1478.15	14.7353	1577.63	9.97537	1713.3	10.2008	1713.3	10.2008	86.275
101517AL4-179	175.042	64308	2.75363	13.4681	0.478967	1.73783	1.08483	0.169826	0.973367	0.897254	1011.15	9.10914	1022.66	6.99196	1047.4	9.67573	1047.4	9.67573	96.5395
101517AL4-180	288.621	25579.3	0.936788	19.3579	1.09825	0.285867	1.53352	0.0401522	1.0703	0.697937	253.776	2.66341	255.301	3.46171	269.305	25.1785	253.776	2.66341	NA
101517AL4-181	303.752	61290.5	1.88308	16.9515	1.00039	0.690804	2.2498	0.084967	2.01515	0.895701	525.702	10.1732	533.283	9.33356	565.868	21.8036	525.702	10.1732	92.902
101517AL4-182	421.736	411884	2.3706	9.22541	0.520916	4.52397	1.19347	0.302826	1.07378	0.899718	1705.3	16.0895	1735.39	9.92481	1771.83	9.50927	1771.83	9.50927	96.2455
101517AL4-184	378.895	157579	1.14715	11.4516	0.720925	2.78356	1.43064	0.23129	1.23572	0.863751	1341.25	14.9635	1351.14	10.6875	1366.79	13.8804	1366.79	13.8804	98.1314
101517AL4-185	1357.18	38061.7	3.92878	14.8503	1.15469	0.154061	1.62535	0.0166002	1.14387	0.70377	106.133	1.20409	145.491	2.20313	847.35	23.9952	106.133	1.20409	NA
101517AL4-186	202.324	90829.2	4.00454	10.997	0.736226	3.11227	1.38054	0.248337	1.16784	0.845932	1429.89	14.9765	1435.73	10.6094	1444.37	14.0249	1444.37	14.0249	98.998
101517AL4-187	442.862	79489.4	2.28376	16.1654	0.702621	0.923335	1.41332	0.108301	1.2263	0.86767	662.874	7.72485	664.122	6.88942	668.373	15.0603	662.874	7.72485	99.1773
101517AL4-188	954.219	427663	3.53956	5.36604	0.554672	12.8916	1.11874	0.501936	0.971559	0.868437	2622.11	20.9308	2671.76	10.5422	2709.55	9.1514	2709.55	9.1514	96.773
101517AL4-189	170.434	219825	1.78527	10.3089	0.686266	2.90968	1.3933	0.217642	1.21257	0.870286	1269.41	13.9717	1384.43	10.5292	1566.46	12.8608	1566.46	12.8608	81.0365
101517AL4-190	215.153	167600	1.97079	9.11481	0.520198	4.73918	1.21269	0.313428	1.09545	0.903322	1757.56	16.8517	1774.2	10.1683	1793.82	9.47232	1793.82	9.47232	97.9786
101517AL4-191	537.897	98935.6	2.34532	11.2493	0.894932	2.66134	1.58635	0.217227	1.30981	0.825675	1267.21	15.0685	1317.79	11.7087	1401.03	17.1488	1401.03	17.1488	90.4481
101517AL4-192	225.333	106451	1.17562	9.66268	0.429075	4.2766	1.13395	0.299836	1.04964	0.925646	1690.5	15.6082	1688.87	9.33213	1686.83	7.91812	1686.83	7.91812	100.217
101517AL4-193	1334.18	336900	7.09705	12.7958	0.642626	1.91963	1.18542	0.178227	0.996118	0.840308	1057.28	9.71346	1087.94	7.91409	1149.82	12.7455	1149.82	12.7455	91.9518
101517AL4-194	241.239	146793	4.05806	5.24361	0.699657	13.8092	1.41044	0.525395	1.22467	0.868291	2722.02	27.1922	2736.71	13.3551	2747.55	11.5031	2747.55	11.5031	99.0708
101517AL4-196	92.657	537816	1.84855	5.16616	0.928836	13.2653	1.32767	0.497248	0.948666	0.714536	2601.96	20.3101	2698.72	12.5365	2771.99	15.2331	2771.99	15.2331	93.8662
101517AL4-197	2955.45	57944.3	8.86697	20.9283	0.746865	0.0723692	1.25198	0.0109894	1.00481	0.802577	70.456	0.704092	70.9453	0.857898	87.4911	17.709	70.456	0.704092	NA
101517AL4-198	1367.59	48810.8	4.45682	20.366	1.07274	0.0706775	1.37763	0.0104442	0.864342	0.627411	66.9784	0.575925	69.3422	0.923391	151.651	25.1115	66.9784	0.575925	NA
101517AL4-199	2100.45	10678.9	3.6251	11.4157	1.12099	0.64995	3.42937	0.0538359	3.24098	0.945066	338.029	10.6732	508.448	13.7177	1372.84	21.565	338.029	10.6732	NA
101517AL4-200	149.143	403784	3.74131	12.1962	0.568498	2.32047	1.10076	0.205347	0.942596	0.856312	1203.98	10.3519	1218.57	7.81103	1244.49	11.1345	1244.49	11.1345	96.7451
101517AL4-201	408.649	2.7147e+06	2.36225	10.0882	0.631806	3.51313	1.63706	0.257157	1.51023	0.922524	1475.28	19.9146	1530.17	12.94	1606.9	11.7794	1606.9	11.7794	91.8092
101517AL4-202	1171.06	86298	5.54044	20.4795	1.00241	0.0714305	1.50224	0.0106143	1.11889	0.744811	68.0635	0.757546	70.056	1.01693	138.636	23.5421	68.0635	0.757546	NA
101517AL4-203	1002.95	273798	4.17297	11.7074	0.647478	0.739312	5.09408	0.0628026	5.05276	0.991889	392.647	19.2474	562.004	21.9894	1324.13	12.54	392.647	19.2474	NA
101517AL4-204	86.8279	53602.5	1.33302	10.6393	0.591404	3.40074	0.926692	0.262528	0.713442	0.769881	1502.76	9.56338	1504.57	7.27144	1507.1	11.1716	1507.1	11.1716	99.7124
101517AL4-205	362.305	168220	1.84184	11.6431	0.6907	2.56181	1.23627	0.216422	1.02533	0.829372	1262.94	11.7598	1289.81	9.02882	1334.8	13.3579	1334.8	13.3579	94.6165
101517AL4-207	440.672	11010.9	4.22964	20.7435	1.59739	0.0777358	1.88294	0.0117001	0.996899	0.529438	74.9859	0.743203	76.0139	1.37903	108.444	37.7488	74.9859	0.743203	NA
101517AL4-208	138.795	107231	1.13008	11.0267	0.612526	2.6266	1.02678	0.21015	0.824072	0.802577	1229.62	9.22515	1308.11	7.55111	1439.23	11.6765	1439.23	11.6765	85.4359
101517AL4-209	759.128	96033.8	1.69215	19.357	1.12979	0.187315	1.54659	0.0263087	1.05618	0.682908	167.404	1.74533	174.336	2.4775	269.408	25.9039	167.404	1.74533	NA
101517AL4-210	225.209	358520	3.67634	10.0089	0.573715	3.42016	1.0875	0.248383	0.923858	0.849522	1430.13	11.8494	1509.04	8.54435	1621.59	10.6744	1621.59	10.6744	88.193
101517AL4-211	188.624	87743.3	1.05267	9.86524	0.632239	4.10863	1.17153	0.294098	0.986288	0.841878	1661.98	14.4493	1656.02	9.56731	1648.46	11.7245	1648.46	11.7245	100.82
101517AL4-212	386.03	87742.2	1.34273	17.4211	0.557319	0.570807	1.02651	0.0721528	0.862041	0.83978	449.112	3.73975	458.536	3.78757	506.042	12.2482	449.112	3.73975	88.75
101517AL4-213	236.261	284514	2.40859	10.6459	0.61138	3.35977	1.17961	0.259524	1.0088	0.855204	1487.41	13.3998	1495.07	9.23049	1505.93	11.5508	1505.93	11.5508	98.7697
101517AL4-214	250.968	158438	0.689764	7.76924	0.434078	6.64783	1.93667	0.374754	1.88739	0.974558	2051.73	33.167	2065.72	17.0949	2079.68	7.63964	2079.68	7.63964	98.656
101517AL4-216	453.161	204175	3.68587	11.0896	0.627863	2.64584	1.09608	0.212897	0.898438	0.819679	1244.23	10.166	1313.49	8.07699	1428.37	11.9865	1428.37	11.9865	87.1085
101517AL4-217	110.737	57448.2	2.19823	17.7599	1.31872	0.495025	1.6238	0.0637903	0.947478	0.583494	398.635	3.66257	408.329	5.45942	463.536	29.2237	398.635	3.66257	NA
101517AL4-218	70.7881	441319	0.965701	10.9697	0.75284	2.99438	1.20094	0.238336	0.935676	0.779119	1378.04	11.609	1406.19	9.14156	1449.1	14.3322	1449.1	14.3322	95.0961
101517AL4-219	99.2815	116831	1.90254	10.9907	0.611843	3.00442	1.14539	0.239594	0.968278	0.845371	1384.59	12.0647	1408.74	8.72598	1445.46	11.6537	1445.46	11.6537	95.7888
101517AL4-221	398.978	854929	2.80281	12.6947	0.889214	2.02685	1.43746	0.186695	1.12942	0.785706	1103.44	11.4543	1124.56	9.77397	1165.56	17.6196	1165.56	17.6196	94.6706
101517AL4-222	1066.84	984014	0.458625	10.7627	0.583161	3.11242	1.05394	0.243056	0.8779	0.832971	1402.57	11.0657	1435.76	8.09944	1485.28	11.0481	1485.28	11.0481	94.431
101517AL4-223	392.867	1.04241e+06	2.42566	10.9401	0.521483	3.19187	1.17388	0.253369	1.05169	0.895909	1455.83	13.7051	1455.19	9.07619	1454.25	9.92082	1454.25	9.92082	100.109
101517AL4-224	303.929	347108	3.87156	13.4539	0.70515	1.74466	1.2213	0.170313	0.997163	0.816477	1013.83	9.3547	1025.19	7.88285	1049.53	14.2327	1049.53	14.2327	96.5991
101517AL4-225	359.85	108427	3.67438	10.7505	0.560748	3.28561	1.18316	0.256289	1.04184	0.880557	1470.83	13.7013	1477.65	9.21062	1487.44	10.6204	1487.44	10.6204	98.8833
101517AL4-226	1694.82	16903.5	4.0529	21.0589	0.854669	0.0675297	1.31004	0.0103185	0.992853	0.757877	66.1768	0.653677	66.3526	0.841455	72.7133	20.3132	66.1768	0.653677	NA
101517AL4-227	492.626	140189	1.15914	10.1842	0.682615	3.6733	1.28637	0.271439	1.09031	0.84759	1548.1	15.0054	1565.58	10.267	1589.22	12.7561	1589.22	12.7561	97.413
101517AL4-228	1647.37	1.62728e+06	8.84185	12.7237	0.636124	1.87007	1.15123	0.172648	0.959516	0.833472	1026.68	9.10677	1070.56	7.61666	1161.03	12.6252	1161.03	12.6252	88.4289
101517AL4-229	161.31	1.22619e+06	6.62169	5.94363	0.517976	11.0653	1.03559	0.477201	0.896745	0.865925	2515.06	18.6746	2528.64	9.64399	2539.54	8.68615	2539.54	8.68615	99.0361
101517AL4-230	87.7216	82599.6	1.95633	10.669	0.713666	3.32159	1.31991	0.257132	1.11034	0.841221	1475.15	14.6403	1486.14	10.3013	1501.84	13.4907	1501.84	13.4907	98.2231
101517AL4-232	557.121	383533	2.28977	17.2582	0.920169	0.548414	1.81245	0.068674	1.56149	0.861537	428.162	6.46852	443.957	6.51812	526.687	20.1716	428.162	6.46852	81.2935
101517AL4-233	203.335	60802.7	2.45197	12.3813	0.659085	2.06861	1.17537	0.185836	0.973192	0.827988	1098.78	9.83157	1138.47	8.04545	1214.94	12.9835	1214.94	12.9835	90.4389
101517AL4-234	240.278	261360	2.05993	8.21815	0.539586	6.02611	1.52157	0.359334	1.42268	0.935009	1979.02	24.2438	1979.62	13.2516	1980.24	9.60837	1980.24	9.60837	99.9381
101517AL4-236	77.9576	506386	0.777634	5.27724	0.61659	13.2999	1.12397	0.509265	0.939743	0.836096	2653.49	20.4412	2701.18	10.6149	2737.03	10.1437	2737.03	10.1437	96.9477
101517AL4-239	388.368	505827	2.76377	8.24222	0.60926	6.09316	1.008	0.364397	0.803036	0.796662	2002.98	13.8257	1989.27	8.79233	1975.03	10.8557	1975.03	10.8557	101.415
101517AL4-241	373.811	89967.3	2.69739	13.6419	0.589619	1.69694	1.17822	0.167969	1.02007	0.865774	1000.91	9.45682	1007.38	7.52762	1021.46	11.9354	1021.46	11.9354	97.9882
101517AL4-242	655.748	3.75216e+06	2.45237	10.9627	0.608955	3.2808	1.24144	0.260967	1.08182	0.871428	1494.79	14.4331	1476.51	9.66102	1450.31	11.5911	1450.31	11.5911	103.067
101517AL4-243	170.616	24634.6	3.19792	17.4858	1.03672	0.581974	1.78496	0.0738373	1.45303	0.814039	459.233	6.44064	465.729	6.66758	497.862	22.8175	459.233	6.44064	92.241
101517AL4-244	225.401	215102	3.31887	13.4004	0.734983	1.75628	1.4448	0.170766	1.24388	0.860938	1016.33	11.6958	1029.48	9.34802	1057.55	14.7977	1057.55	14.7977	96.1025
101517AL4-245	379.829	37578.4	1.12363	17.9074	0.720299	0.532457	1.25707	0.0691838	1.03024	0.819557	431.236	4.29744	433.439	4.43496	445.138	16.0134	431.236	4.29744	96.8769
101517AL4-248	2653.94	93263.5	6.4832	20.8093	0.941629	0.072228	1.46607	0.0109056	1.1237	0.766469	69.9217	0.781462	70.8115	1.00277	100.973	22.271	69.9217	0.781462	NA
101517AL4-249	605.246	1.00549e+06	3.36244	11.4352	0.641426	2.84968	1.31408	0.236445	1.1469	0.872778	1368.19	14.1384	1368.73	9.87727	1369.55	12.3453	1369.55	12.3453	99.9004
101517AL4-250	584.61	1.61893e+09	3.65449	7.02818	0.512294	6.61516	1.16063	0.337342	1.04145	0.897314	1873.87	16.935	2061.37	10.2376	2254.43	8.84651	2254.43	8.84651	83.1195
101517AL4-252	159.867	143563	2.0612	9.77601	0.602533	4.07333	1.2473	0.288934	1.09211	0.875582	1636.2	15.7818	1648.98	10.1689	1665.28	11.148	1665.28	11.148	98.2536
101517AL4-253	363.394	134980	1.41047	9.28948	0.56545	3.75512	1.02162	0.253106	0.850862	0.832859	1454.47	11.0788	1583.21	8.19199	1759.18	10.3405	1759.18	10.3405	82.6791
101517AL4-254	294.555	132987	3.81987	11.7456	0.78067	2.27166	1.26356	0.1936	0.993546	0.786308	1140.85	10.3885	1203.53	8.90864	1317.83	15.133	1317.83	15.133	86.57
101517AL4-255	425.143	200055	1.78545	7.98373	0.741729	6.74216	1.65861	0.390564	1.48352	0.894434	2125.44	26.8605	2078.16	14.667	2031.62	13.1276	2031.62	13.1276	104.618
101517AL4-256	2079.86	29907.4	1.80813	20.5233	0.897737	0.0928611	1.44726	0.0138283	1.13518	0.784364	88.5324	0.998132	90.1651	1.24866	133.574	21.1102	88.5324	0.998132	NA
101517AL4-257	82.862	35730.6	4.44119	12.7778	0.838047	1.99514	1.41404	0.184978	1.13894	0.805452	1094.11	11.4612	1113.87	9.56447	1152.61	16.6349	1152.61	16.6349	94.9246
101517AL4-258	841.462	98621.1	16.4518	18.3056	0.694764	0.494272	1.38037	0.0656505	1.19278	0.864101	409.898	4.73697	407.817	4.63622	396.033	15.5776	409.898	4.73697	103.501
101517AL4-260	205.725	103439	3.69023	13.6733	0.798092	1.69012	1.16385	0.167679	0.847116	0.727854	999.309	7.8418	1004.81	7.42476	1016.81	16.1665	1016.81	16.1665	98.2791
101517AL4-261	347.334	2.83215e+06	2.72202	9.66546	0.651686	4.11774	1.19462	0.288781	1.00121	0.838099	1635.44	14.4622	1657.83	9.76009	1686.3	12.027	1686.3	12.027	96.9836
101517AL4-262	68.6913	38575.4	2.66253	5.18312	0.73233	13.8475	1.34951	0.520776	1.13352	0.83995	2702.47	25.0228	2739.33	12.7805	2766.61	12.0189	2766.61	12.0189	97.6817
101517AL4-263	1054.74	10825.5	4.15738	21.168	0.973065	0.0764859	1.40895	0.0117476	1.01896	0.723207	75.2885	0.7627	74.8357	1.01648	60.395	23.1901	75.2885	0.7627	NA
101517AL4-264	250.271	118708	2.72572	12.8517	0.637509	2.04324	1.12475	0.190532	0.92663	0.823855	1124.25	9.55984	1130.04	7.6679	1141.16	12.6764	1141.16	12.6764	98.5184
101517AL4-265	223.13	128838	15.6293	9.67273	0.629522	3.89764	1.26932	0.273551	1.10221	0.868349	1558.8	15.2618	1613.19	10.2572	1684.91	11.62	1684.91	11.62	92.5153
101517AL4-266	528.605	26695.8	0.962663	9.20385	1.02775	4.01983	2.35705	0.268451	2.12119	0.899931	1532.93	28.9395	1638.21	19.1677	1776.1	18.7539	1776.1	18.7539	86.3091
101517AL4-267	230.133	173466	1.5945	8.17802	0.60791	5.83077	1.08082	0.345988	0.893649	0.826828	1915.41	14.8083	1950.99	9.36807	1988.95	10.814	1988.95	10.814	96.3026
101517AL4-268	290.969	139041	2.44521	11.8156	0.657149	2.55789	1.34937	0.219294	1.17854	0.873399	1278.14	13.6641	1288.69	9.85063	1306.3	12.7594	1306.3	12.7594	97.8446
101517AL4-269	169.751	61430.5	0.854251	10.0238	0.694718	3.46234	1.30956	0.25182	1.11009	0.847685	1447.85	14.3955	1518.68	10.3175	1618.84	12.9308	1618.84	12.9308	89.438
101517AL4-270	237.151	8588.52	1.63113	20.6025	2.58372	0.080689	3.02883	0.0120621	1.58058	0.521844	77.2918	1.21436	78.7925	2.29625	124.52	60.8258	77.2918	1.21436	NA
101517AL4-271	418.994	614747	2.80929	8.51216	0.50293	5.39738	1.07029	0.333358	0.944765	0.882719	1854.63	15.2267	1884.44	9.16904	1917.43	9.02199	1917.43	9.02199	96.7252
101517AL4-272	122.062	1.17917e+06	1.51349	10.6277	0.580284	3.44907	1.29705	0.265969	1.16	0.89434	1520.31	15.7104	1515.66	10.2102	1509.16	10.9586	1509.16	10.9586	100.739
101517AL4-273	104.279	89430.1	2.60842	8.90918	0.482751	4.8298	1.24569	0.312216	1.14834	0.921854	1751.6	17.6133	1790.1	10.4792	1835.26	8.74596	1835.26	8.74596	95.4418
101517AL4-275	929.404	390513	4.2322	12.7679	0.597545	2.04227	1.3542	0.1892	1.21524	0.897383	1117.04	12.4637	1129.72	9.23084	1154.15	11.8595	1154.15	11.8595	96.7844
101517AL4-276	91.6964	80870.4	3.05972	8.9655	0.751431	4.93432	1.50108	0.320989	1.29946	0.865683	1794.56	20.3552	1808.15	12.674	1823.83	13.6309	1823.83	13.6309	98.3949
101517AL4-277	419.821	46583.2	1.23356	20.5708	3.07026	0.0255066	3.45311	0.00380707	1.58034	0.457656	24.4954	0.386375	25.5742	0.872077	128.188	72.28	24.4954	0.386375	NA
101517AL4-278	581.024	81737.4	1.33945	17.7353	0.830286	0.488523	1.55457	0.0628654	1.31427	0.845425	393.028	5.01114	403.904	5.18052	466.579	18.3969	393.028	5.01114	NA
101517AL4-279	270.75	110233	3.57317	11.6185	0.568074	2.79502	1.12498	0.235625	0.971019	0.863141	1363.91	11.9366	1354.21	8.41311	1338.89	10.9794	1338.89	10.9794	101.869
101517AL4-280	1153.9	41903.7	4.31339	20.9619	0.939614	0.0703964	1.54232	0.010707	1.22306	0.793	68.655	0.835235	69.0756	1.02994	83.6408	22.2718	68.655	0.835235	NA
101517AL4-281	541.708	386183	2.20538	10.2226	0.670057	3.65488	1.28342	0.271094	1.09462	0.852892	1546.35	15.0495	1561.57	10.2324	1582.2	12.5312	1582.2	12.5312	97.7344
101517AL4-282	103.346	444907	1.02199	5.29927	0.526597	13.1473	1.00761	0.505523	0.859049	0.852565	2637.49	18.5948	2690.28	9.50815	2730.18	8.668	2730.18	8.668	96.6049
101517AL4-283	1945.42	21756.1	3.64414	20.9444	1.13798	0.0719716	1.42314	0.0109375	0.854586	0.600495	70.1247	0.596028	70.5687	0.970185	85.6646	26.9823	70.1247	0.596028	NA
101517AL4-284	308.984	50008.7	2.79479	17.1456	0.764887	0.667291	1.24312	0.0830147	0.979949	0.788297	514.092	4.8422	519.064	5.05186	541.018	16.7318	514.092	4.8422	95.0231
101517AL4-285	103.682	92263.8	1.49405	10.0358	0.566642	3.44708	2.24613	0.251009	2.17348	0.967655	1443.68	28.1128	1515.2	17.6801	1616.61	10.5496	1616.61	10.5496	89.3026
101517AL4-286	2821.28	61005.7	2.79906	18.6918	0.646355	0.257147	2.39702	0.0348755	2.30823	0.962959	220.99	5.01453	232.365	4.97853	349.046	14.6094	220.99	5.01453	NA
101517AL4-287	521.992	231479	3.07614	12.2961	0.596047	2.37376	1.44822	0.211783	1.31987	0.911377	1238.31	14.8702	1234.73	10.3467	1228.52	11.7042	1228.52	11.7042	100.797
101517AL4-288	676.737	604156	1.75433	9.74174	0.662102	3.82498	1.273	0.270367	1.08726	0.854097	1542.67	14.9169	1598.02	10.2472	1671.78	12.2402	1671.78	12.2402	92.2768
101517AL4-289	762.896	103125	1.42588	17.3642	0.926889	0.556974	1.21636	0.0701741	0.787666	0.647558	437.205	3.32953	449.555	4.41824	513.238	20.3443	437.205	3.32953	85.1856
101517AL4-290	370.309	214962	1.23167	10.0085	0.666767	3.9464	1.33776	0.286588	1.15975	0.866935	1624.46	16.6533	1623.25	10.8377	1621.67	12.4059	1621.67	12.4059	100.172
101517AL4-291	97.8556	20927.8	2.57858	14.3651	1.0777	1.43496	1.44976	0.149567	0.969726	0.668888	898.538	8.13336	903.621	8.6753	916.087	22.1527	916.087	22.1527	98.0843
101517AL4-293	570.628	297279	1.17917	10.3561	0.75233	3.12244	1.87755	0.234627	1.72023	0.91621	1358.7	21.0741	1438.23	14.4408	1557.89	14.1165	1557.89	14.1165	87.2146
101517AL4-295	158.971	173269	3.0369	3.9023	2.43652	21.3515	2.87005	0.604558	1.51675	0.528474	3048.18	36.8399	3154.69	27.8452	3223.15	38.4643	3223.15	38.4643	94.5713
101517AL4-296	676.571	682461	1.39713	8.32441	0.579398	5.94362	1.20987	0.358998	1.06211	0.877873	1977.42	18.0868	1967.63	10.5159	1957.34	10.3429	1957.34	10.3429	101.026
101517AL4-297	262.551	95743.2	3.42972	9.91623	0.477726	3.89283	1.04636	0.280092	0.930943	0.889693	1591.82	13.1311	1612.2	8.45334	1638.89	8.87006	1638.89	8.87006	97.1281
101517AL4-298	152.807	188224	0.263857	5.55078	0.503697	12.4921	1.20313	0.503128	1.09261	0.908145	2627.22	23.576	2642.14	11.3114	2653.56	8.35437	2653.56	8.35437	99.0075
101517AL4-299	869.017	73997.6	1.39384	17.0223	0.830858	0.619283	1.70279	0.0764883	1.48633	0.872878	475.128	6.808	489.398	6.61248	556.745	18.1207	475.128	6.808	85.3403
101517AL4-300	153.634	306154	1.87928	8.97633	0.617353	5.09434	1.08338	0.331799	0.890269	0.821755	1847.09	14.298	1835.16	9.19565	1821.64	11.2013	1821.64	11.2013	101.397
101517AL4-303	88.4312	472513	0.368041	8.89908	0.771522	4.985	1.21178	0.321883	0.934434	0.771124	1798.92	14.6681	1816.78	10.2487	1837.31	13.9743	1837.31	13.9743	97.9104
101517AL4-304	184.769	117801	2.05695	9.35348	0.529796	4.52764	1.16864	0.307279	1.04164	0.891335	1727.3	15.7835	1736.06	9.71973	1746.62	9.70186	1746.62	9.70186	98.8943
101517AL4-305	49.2773	11738	1.0534	13.4675	1.2851	1.77459	1.68382	0.17341	1.08801	0.646154	1030.87	10.3651	1036.2	10.9356	1047.49	25.9308	1047.49	25.9308	98.4135
101517AL4-306	187.194	99154.1	1.69258	16.8411	0.792307	0.704381	1.06365	0.0860729	0.709649	0.667182	532.27	3.62551	541.404	4.46347	580.056	17.2247	532.27	3.62551	91.7618
101517AL4-307	217.232	92983	3.49441	10.6863	0.652742	3.39758	1.0892	0.263441	0.871945	0.800536	1507.42	11.7202	1503.84	8.54485	1498.78	12.344	1498.78	12.344	100.577
101517AL4-309	58.9285	108939	0.851687	9.78475	0.621683	3.95891	1.26576	0.281069	1.10257	0.871073	1596.74	15.5943	1625.82	10.2609	1663.63	11.5048	1663.63	11.5048	95.9792
101517AL4-310	505.786	1.67712e+06	1.2338	9.96883	0.448422	4.066	1.38034	0.294103	1.30548	0.945761	1662	19.1258	1647.51	11.2496	1629.06	8.33485	1629.06	8.33485	102.022
101517AL4-311	137.262	57364.3	0.924121	8.25891	0.573434	5.65643	1.15417	0.338964	1.00164	0.867845	1881.68	16.3462	1924.74	9.959	1971.43	10.2196	1971.43	10.2196	95.4477
101517AL4-312	441.368	206851	5.65001	9.481	0.552472	4.34637	1.14147	0.298998	0.998859	0.875067	1686.34	14.8212	1702.21	9.42265	1721.78	10.1505	1721.78	10.1505	97.9417
101517AL4-313	300.539	102846	1.60784	9.88338	0.588012	3.5367	1.75237	0.253625	1.65077	0.942021	1457.14	21.5293	1535.46	13.8721	1645.05	10.9091	1645.05	10.9091	88.5775
101517AL4-314	104.259	35816.1	1.99047	9.22646	0.557173	4.71725	0.88743	0.3158	0.690717	0.778334	1769.19	10.6866	1770.31	7.43487	1771.62	10.1716	1771.62	10.1716	99.8626

## Sheet: Lu-Hf
Lu-Hf detrital zircon isotopic analyses by LA-ICP-MS analysis
Analysis	(176Yb + 176Lu) / 176Hf (%)	Volts Hf	176Hf/177Hf	± (1s)	176Lu/177Hf	176Hf/177Hf (T)	E-Hf (0)	E-Hf (0) ± (1s)	E-Hf (T)	Age (Ma)
101517AL1-203	27.2277	4.07596	0.28304	1.72639e-05	0.00168707	0.283039	9.00605	0.610495	9.53766	25.2
101517AL1-149	40.9541	3.79671	0.283144	2.71891e-05	0.00262825	0.283143	12.7007	0.961477	13.2271	25.7
101517AL1-35	22.3407	4.36515	0.282497	1.84961e-05	0.00147986	0.282497	-10.1764	0.654069	-9.62123	26.2
101517AL1-18	30.9786	4.64467	0.283011	1.88908e-05	0.00201911	0.28301	7.99353	0.668028	8.53835	26.1
101517AL1-222	16.523	4.57431	0.282494	1.77877e-05	0.00108077	0.282493	-10.3061	0.62902	-9.73116	26.8
101517AL1-151	25.8779	4.47933	0.283114	2.00222e-05	0.00163863	0.283113	11.636	0.708036	12.38	35.2
101517AL1-58	29.9518	5.02545	0.282198	1.68768e-05	0.00199192	0.282196	-20.7467	0.596807	-19.3422	67.4
101517AL1-15	13.5165	5.0248	0.28228	1.71983e-05	0.000870852	0.282279	-17.8519	0.608176	-16.2372	74.8
101517AL1-59	13.9767	4.91938	0.282276	1.57051e-05	0.000896584	0.282275	-18.0048	0.555374	-16.3633	76.1
101517AL1-219	11.0238	5.52264	0.282268	1.4847e-05	0.000735575	0.282267	-18.2874	0.525029	-16.6227	76.8
101517AL1-282	30.4688	3.9802	0.282279	2.01124e-05	0.00204498	0.282276	-17.9046	0.711225	-16.2875	77.7
101517AL1-158	14.8012	4.27478	0.282244	1.93709e-05	0.0010765	0.282242	-19.1321	0.685005	-17.3517	83
101517AL1-89	13.5005	4.62709	0.282829	1.69984e-05	0.000944219	0.282827	1.5561	0.601105	3.67603	98.2
101517AL1-213	21.6068	5.62958	0.28247	1.50451e-05	0.00136678	0.282467	-11.1528	0.532034	-9.05024	98.8
101517AL1-270	11.2428	3.64478	0.283002	2.09607e-05	0.000931194	0.282999	7.6713	0.741222	10.9559	151.9
101517AL1-218	10.2804	4.7137	0.282588	1.86845e-05	0.000701334	0.282586	-6.95212	0.660733	-3.62539	153
101517AL1-85	9.94022	5.14032	0.282535	1.70974e-05	0.000663611	0.282533	-8.83514	0.604609	-5.28937	162.9
101517AL1-204	5.747	5.80217	0.282611	1.40532e-05	0.000399148	0.28261	-6.14772	0.496955	-2.53289	164.7
101517AL1-169	70.2452	4.18724	0.282491	2.01948e-05	0.0041892	0.282478	-10.3863	0.714139	-7.14115	167
101517AL1-279	13.6074	4.48371	0.282499	1.43424e-05	0.000872177	0.282497	-10.0999	0.507184	-6.41668	170.3
101517AL1-257	33.714	4.55943	0.282605	1.93782e-05	0.00235285	0.282598	-6.35194	0.685262	-2.82793	170.6
101517AL2-282	29.4217	3.40044	0.283166	2.25281e-05	0.00194621	0.283165	13.4694	0.79665	13.9907	24.9
101517AL2-194	29.0895	3.58369	0.283003	2.12883e-05	0.00167724	0.283002	7.72051	0.75281	8.31131	28
101517AL2-213	29.784	3.97779	0.283013	2.49147e-05	0.00202464	0.283011	8.07552	0.881046	9.49961	68.2
101517AL2-297	37.7251	5.03833	0.282386	2.33111e-05	0.00266017	0.282382	-14.1222	0.82434	-12.6994	69.7
101517AL2-66	26.3826	4.2256	0.282307	1.79977e-05	0.00164057	0.282305	-16.899	0.636444	-15.2757	77
101517AL2-38	20.645	4.05623	0.281414	2.47973e-05	0.00136157	0.281411	-48.4995	0.876894	-46.5301	92.9
101517AL2-27	13.9826	4.8232	0.28249	1.67197e-05	0.000976692	0.282489	-10.4228	0.591251	-8.39164	94.3
101517AL2-83	19.7657	4.17093	0.28244	1.7911e-05	0.00124354	0.282438	-12.2073	0.633379	-10.1376	96.9
101517AL2-151	11.1472	4.04238	0.282418	1.681e-05	0.000687838	0.282417	-12.9608	0.594444	-10.8317	98
101517AL2-192	11.0221	3.76813	0.282304	1.58364e-05	0.000711345	0.282302	-17.0227	0.560016	-14.8744	99
101517AL2-227	34.1736	4.76711	0.283015	1.89599e-05	0.00268079	0.283009	8.1386	0.67047	10.5467	117.7
101517AL2-206	24.2353	6.09814	0.282273	2.04687e-05	0.00165798	0.282269	-18.0998	0.723825	-15.125	141.1
101517AL2-101	15.1194	4.67579	0.282904	1.63531e-05	0.00104009	0.282901	4.22226	0.578286	7.74947	163.7
101517AL2-276	18.0494	4.44166	0.282413	1.7279e-05	0.00114246	0.282409	-13.1724	0.611031	-9.57456	167.8
101517AL3-229	52.2633	6.30176	0.282984	1.53271e-05	0.00335897	0.282983	7.04136	0.542005	7.48505	22.2
101517AL3-130	49.832	3.95294	0.283042	2.30146e-05	0.00320025	0.28304	9.09016	0.813855	9.63076	26.9
101517AL3-103	32.1907	4.86194	0.282128	2.58326e-05	0.00204082	0.282126	-23.218	0.913507	-21.8722	64.7
101517AL3-42	32.0004	3.90111	0.280974	2.23286e-05	0.00201125	0.280972	-64.0363	0.789595	-62.6536	66.7
101517AL3-79	22.159	3.47422	0.282203	1.83617e-05	0.00150943	0.282201	-20.5698	0.649315	-19.1375	67.7
101517AL3-257	28.1739	4.63603	0.282328	1.92066e-05	0.00194292	0.282325	-16.1758	0.679194	-14.7454	68.5
101517AL3-131	13.4577	6.51024	0.282166	1.44718e-05	0.000892365	0.282164	-21.902	0.511761	-20.3904	70.1
101517AL3-74	89.8566	4.53993	0.282108	2.83522e-05	0.00538819	0.282101	-23.9467	1.00261	-22.6325	70.7
101517AL3-296	21.6788	5.76678	0.282201	1.35486e-05	0.00176916	0.282198	-20.6653	0.479112	-18.9841	80.1
101517AL3-107	28.734	5.85705	0.282171	2.02379e-05	0.00203822	0.282167	-21.715	0.715663	-19.3565	113.3
101517AL3-66	26.1378	4.59819	0.283028	2.3865e-05	0.00194917	0.283022	8.59055	0.843927	11.8446	155.3
101517AL3-283	60.8027	4.95912	0.282917	1.92069e-05	0.00370014	0.282906	4.67142	0.679204	7.79577	157.9
101517AL3-31	10.1066	5.37184	0.282827	1.94988e-05	0.000790868	0.282824	1.48103	0.689528	5.06032	164.9
101517AL3-231	16.2519	4.34821	0.28259	1.5994e-05	0.00109578	0.282587	-6.88312	0.565588	-3.26696	168.3
101517AL4-74	22.444	3.46634	0.282083	2.1301e-05	0.00139903	0.282081	-24.8191	0.753258	-23.3995	66.9
101517AL4-96	34.7044	5.02284	0.282195	1.5418e-05	0.00222075	0.282192	-20.8683	0.545221	-19.4657	67.8
101517AL4-82	25.7133	5.33964	0.28221	1.33261e-05	0.00161787	0.282208	-20.3388	0.471246	-18.8669	69.8
101517AL4-112	26.8801	3.54605	0.282025	1.83712e-05	0.00173492	0.282023	-26.8786	0.649652	-25.4132	69.8
101517AL4-102	20.7871	4.40269	0.282272	1.87351e-05	0.00133569	0.28227	-18.1411	0.662522	-16.379	82.8
101517AL4-159	29.0676	3.65147	0.282487	2.10275e-05	0.00195648	0.282483	-10.543	0.743587	-8.56673	94.6
101517AL4-67	30.1274	2.58437	0.283923	3.9787e-05	0.00201059	0.283919	40.2432	1.40697	42.632	113.9
101517AL4-209	15.9869	4.39519	0.282547	1.91891e-05	0.00120946	0.282544	-8.40536	0.678576	-4.82173	167.4
101517AL4-125	32.4669	4.54888	0.283069	2.28073e-05	0.00225229	0.283062	10.0502	0.806525	13.7582	178.6
Notes:
Hf fractionation is corrected by comparing measured 179Hf/177Hf against known 179/177 to determine a Beta value. Beta Hf is applied as a power law. Operator can select between three Beta values (on STD PLOT), calculated as follows:
	Beta determined and applied line-by-line
	Beta determined from the average of the 60 measurements in each analysis (= default selection)
	Beta determined from the sliding window average of the closest 16 analyses. This also has an intensity filter to remove lower intensity analyses.
Yb fractionation is corrected by comparing measured 173Yb/171Yb against known 173/171 to determine a Beta value. Beta Yb is applied as a power law. Operator can select between three Beta values (on STD PLOT), calculated as follows:
	Beta determined and applied line-by-line
	Beta determined from the average of the 60 measurements in each analysis (= default selection)
	Beta determined from the sliding window average of the closest 16 analyses. This also has an intensity filter to remove lower intensity analyses.
Lu fractionation is assumed to be the same as Yb fractionation.
All constants used (and citations) are listed on Sheet "K"
Data are filtered line-by-line relative to the max intensity for the analysis. Cutoff is the % relative to the max, with values below cutoff rejected). % retained is for all STD or UNKNOWN analyses in the session.
Data are filtered by removing 1 max and 1 min value (out of 60).
Data are also filtered by 95% filter (rejected if outside of 2-sigma std dev of 58 analyses)
An optional filter removes analyses from beginning of analysis (first 10 rows) and then end of run (last 10 rowa) if removal yields improved standard error.
Uncertainties are standard error of the mean, expressed at 1-sigma
